# Supplementary material for: Development and Application of a Target Capture Sequencing SNP-Genotyping Platform in Rice
Source: Genes (Basel). 2022 Apr 28;13(5):794. doi: 10.3390/genes13050794 (PMC9141132; doi:10.3390/genes13050794)
Supplement: Supplementary file 1 [file genes-13-00794-s001.zip]

Archive with 5 entries (5 files):
- Figure_S1.pdf
- Table_S1.xlsx
- Table_S2.xlsx
- Table_S3.xlsx
- Table_S4.xlsx
