# Supplementary material for: Development and Application of a Target Capture Sequencing SNP-Genotyping Platform in Rice
Source: Genes (Basel). 2022 Apr 28;13(5):794. doi: 10.3390/genes13050794 (PMC9141132; doi:10.3390/genes13050794)
Supplement: Supplementary file 1 [file genes-13-00794-s001.zip › Table_S1.xlsx]

## Sheet: Sheet1
Table S1. List of varieties included in the diversity analysis using the target capture sequencing SNP-genotyping platform.
No.	Variety name	Subspecies
1	Odae	japonica
2	Unbong40ho	japonica
3	Junam	japonica
4	Samgwang	japonica
5	Hwayeong	japonica
6	Nampyeong	japonica
7	Dongan	japonica
8	Hiami	japonica
9	Ilpum	japonica
10	Giho	japonica
11	Saeilmi	japonica
12	Sindongjin	japonica
13	Sodami	japonica
14	Ungwang	japonica
15	Namchan	japonica
16	Heukgwang	japonica
17	Heuksujeong	japonica
18	Goami	japonica
19	Yechan	japonica
20	Haedeul	japonica
21	Deuraechan	japonica
22	IR24	indica
23	Jangseong	indica
24	Nongan	indica
25	Tongil	indica
26	Yongmun	indica
27	Anda	indica
28	Dasan	indica
29	Dasan1ho	indica
30	Jowoo	indica
31	Mokwoo	indica
32	Yeongwoo	indica
33	Miwoo	indica
34	Mokyang	japonica
35	Nokwoo	japonica
36	Milyang23ho	indica
37	Hanareum2ho	indica
38	Saemimyeon	indica
39	Hanareumchal	indica
40	Hanareum4ho	indica
41	Geumgang1ho	indica
42	93-11	indica
43	Milyang392ho	indica
44	Singwang	indica
45	Saenuri	japonica
46	Calrose	japonica
47	Baekokchal	japonica
48	Aikawa1	japonica
49	Koshihikari	japonica
50	Joun	japonica
