# Supplementary material for: Development and Application of a Target Capture Sequencing SNP-Genotyping Platform in Rice
Source: Genes (Basel). 2022 Apr 28;13(5):794. doi: 10.3390/genes13050794 (PMC9141132; doi:10.3390/genes13050794)
Supplement: Supplementary file 1 [file genes-13-00794-s001.zip › Table_S2.xlsx]

## Sheet: Sheet1
Table S2. List of all SNP markers included in the target capture sequencing SNP-genotyping platform developed in this study.
No.	Marker name (target capture panel)	Marker name (original)	Chromosome	Position (bp)	Reference
1	chr1_194844	s01_194844	1	194844	Arbelaez et al. 2019
2	chr1_375814	s01_375814	1	375814	Arbelaez et al. 2019
3	chr1_717702	s01_717702	1	717702	Arbelaez et al. 2019
4	chr1_728809	KJ01_001	1	728809	Cheon et al. 2018
5	chr1_858021	KGH01_001	1	858021	Cheon et al. 2020
6	chr1_932866	s01_932866	1	932866	Arbelaez et al. 2019
7	chr1_1044946	s01_1044946	1	1044946	Arbelaez et al. 2019
8	chr1_1050097	SK01_1050097	1	1050097	Yang et al. 2019
9	chr1_1175585	SK01_1175585	1	1175585	Yang et al. 2019
10	chr1_1360285	KJ01_002	1	1360285	Cheon et al. 2019
11	chr1_1410467	s01_1410467	1	1410467	Arbelaez et al. 2019
12	chr1_1532281	s01_1532281	1	1532281	Arbelaez et al. 2019
13	chr1_1625482	SK01_1625482	1	1625482	Yang et al. 2019
14	chr1_2072665	KGH01_003	1	2072665	Cheon et al. 2020
15	chr1_2100471	s01_2100471	1	2100471	Arbelaez et al. 2019
16	chr1_2103204	KJ01_005	1	2103204	Cheon et al. 2018
17	chr1_2277961	s01_2277961	1	2277961	Arbelaez et al. 2019
18	chr1_2287476	SK01_2287476	1	2287476	Yang et al. 2019
19	chr1_2363715	KGH01_004	1	2363715	Cheon et al. 2020
20	chr1_2416981	KJ01_007	1	2416981	Cheon et al. 2018
21	chr1_2532252	s01_2532252	1	2532252	Arbelaez et al. 2019
22	chr1_2637005	KGH01_005	1	2637005	Cheon et al. 2020
23	chr1_2726468	SK01_2726468	1	2726468	Yang et al. 2019
24	chr1_2743020	KGH01_006	1	2743020	Cheon et al. 2020
25	chr1_2865232	s01_2865232	1	2865232	Arbelaez et al. 2019
26	chr1_2871043	KJ01_009	1	2871043	Cheon et al. 2018
27	chr1_3236648	s01_3236648	1	3236648	Arbelaez et al. 2019
28	chr1_3257654	KJ01_011	1	3257654	Cheon et al. 2018
29	chr1_3523649	KJ01_013	1	3523649	Cheon et al. 2018
30	chr1_3529691	s01_3529691	1	3529691	Arbelaez et al. 2019
31	chr1_4004196	SK01_4004196	1	4004196	Yang et al. 2019
32	chr1_4167976	s01_4167976	1	4167976	Arbelaez et al. 2019
33	chr1_4209102	KJ01_015	1	4209102	Cheon et al. 2018
34	chr1_4307004	s01_4307004	1	4307004	Arbelaez et al. 2019
35	chr1_5064126	s01_5064126	1	5064126	Arbelaez et al. 2019
36	chr1_5104605	KJ01_017	1	5104605	Cheon et al. 2018
37	chr1_5264642	SK01_5264642	1	5264642	Yang et al. 2019
38	chr1_5273672	SK01_5273672	1	5273672	Yang et al. 2019
39	chr1_5282345	KJ01_018	1	5282345	Cheon et al. 2019
40	chr1_5290075	SK01_5290075	1	5290075	Yang et al. 2019
41	chr1_5317048	SK01_5317048	1	5317048	Yang et al. 2019
42	chr1_5438204	SK01_5438204	1	5438204	Yang et al. 2019
43	chr1_5442863	SK01_5442863	1	5442863	Yang et al. 2019
44	chr1_5510350	s01_5510350	1	5510350	Arbelaez et al. 2019
45	chr1_5545903	KJ01_019	1	5545903	Cheon et al. 2018
46	chr1_6090970	KJ01_020	1	6090970	Cheon et al. 2019
47	chr1_6130240	s01_6130240	1	6130240	Arbelaez et al. 2019
48	chr1_6543217	s01_6543217	1	6543217	Arbelaez et al. 2019
49	chr1_6597130	KJS01_001	1	6597130	Cheon et al. 2020
50	chr1_6802927	KJS01_002	1	6802927	Cheon et al. 2020
51	chr1_6829682	s01_6829682	1	6829682	Arbelaez et al. 2019
52	chr1_6950338	KJS01_003	1	6950338	Cheon et al. 2020
53	chr1_6962310	KJ01_021	1	6962310	Cheon et al. 2018
54	chr1_7005390	KJ01_022	1	7005390	Cheon et al. 2019
55	chr1_7027262	SK01_7027262	1	7027262	Yang et al. 2019
56	chr1_7068516	s01_7068516	1	7068516	Arbelaez et al. 2019
57	chr1_7563923	s01_7563923	1	7563923	Arbelaez et al. 2019
58	chr1_7847128	KJ01_023	1	7847128	Cheon et al. 2018
59	chr1_7854101	SK01_7854101	1	7854101	Yang et al. 2019
60	chr1_8221027	KJ01_024	1	8221027	Cheon et al. 2019
61	chr1_8245748	s01_8245748	1	8245748	Arbelaez et al. 2019
62	chr1_8509783	KJ01_025	1	8509783	Cheon et al. 2018
63	chr1_8657303	SK01_8657303	1	8657303	Yang et al. 2019
64	chr1_8709969	KJ01_026	1	8709969	Cheon et al. 2019
65	chr1_8760562	s01_8760562	1	8760562	Arbelaez et al. 2019
66	chr1_8924578	SK01_8924578	1	8924578	Yang et al. 2019
67	chr1_8959187	KJ01_027	1	8959187	Cheon et al. 2018
68	chr1_9164508	s01_9164508	1	9164508	Arbelaez et al. 2019
69	chr1_9392804	KJ01_029	1	9392804	Cheon et al. 2018
70	chr1_9423941	SK01_9423941	1	9423941	Yang et al. 2019
71	chr1_9727509	KJ01_030	1	9727509	Cheon et al. 2019
72	chr1_9880602	KJ01_031	1	9880602	Cheon et al. 2018
73	chr1_10100605	s01_10100605	1	10100605	Arbelaez et al. 2019
74	chr1_10202227	s01_10202227	1	10202227	Arbelaez et al. 2019
75	chr1_10219743	KJ01_033	1	10219743	Cheon et al. 2018
76	chr1_10438894	SK01_10438894	1	10438894	Yang et al. 2019
77	chr1_10508312	KJ01_034	1	10508312	Cheon et al. 2019
78	chr1_10645259	s01_10645259	1	10645259	Arbelaez et al. 2019
79	chr1_10747508	KJ01_035	1	10747508	Cheon et al. 2018
80	chr1_10846090	s01_10846090	1	10846090	Arbelaez et al. 2019
81	chr1_10949580	KJ01_036	1	10949580	Cheon et al. 2019
82	chr1_11209993	KJ01_037	1	11209993	Cheon et al. 2018
83	chr1_11250486	s01_11250486	1	11250486	Arbelaez et al. 2019
84	chr1_11422519	KJ01_038	1	11422519	Cheon et al. 2019
85	chr1_11459523	SK01_11459523	1	11459523	Yang et al. 2019
86	chr1_11817615	KJ01_039	1	11817615	Cheon et al. 2018
87	chr1_11845635	KJ01_040	1	11845635	Cheon et al. 2019
88	chr1_12085916	KJ01_041	1	12085916	Cheon et al. 2018
89	chr1_12216652	s01_12216652	1	12216652	Arbelaez et al. 2019
90	chr1_12335190	s01_12335190	1	12335190	Arbelaez et al. 2019
91	chr1_12941687	s01_12941687	1	12941687	Arbelaez et al. 2019
92	chr1_12947332	KJ01_043	1	12947332	Cheon et al. 2018
93	chr1_13121543	s01_13121543	1	13121543	Arbelaez et al. 2019
94	chr1_13208844	KJ01_044	1	13208844	Cheon et al. 2019
95	chr1_13245925	SK01_13245925	1	13245925	Yang et al. 2019
96	chr1_13343177	SK01_13343177	1	13343177	Yang et al. 2019
97	chr1_13442034	s01_13442034	1	13442034	Arbelaez et al. 2019
98	chr1_13519853	KJ01_045	1	13519853	Cheon et al. 2018
99	chr1_13777831	s01_13777831	1	13777831	Arbelaez et al. 2019
100	chr1_13902629	s01_13902629	1	13902629	Arbelaez et al. 2019
101	chr1_13954900	KJ01_046	1	13954900	Cheon et al. 2019
102	chr1_14249773	KJS01_004	1	14249773	Cheon et al. 2020
103	chr1_14375630	s01_14375630	1	14375630	Arbelaez et al. 2019
104	chr1_14508449	s01_14508449	1	14508449	Arbelaez et al. 2019
105	chr1_14710701	KJS01_006	1	14710701	Cheon et al. 2020
106	chr1_14937939	s01_14937939	1	14937939	Arbelaez et al. 2019
107	chr1_15013659	KJ01_049	1	15013659	Cheon et al. 2018
108	chr1_15092392	s01_15092392	1	15092392	Arbelaez et al. 2019
109	chr1_15132528	KJ01_050	1	15132528	Cheon et al. 2019
110	chr1_15337994	KJ01_051	1	15337994	Cheon et al. 2018
111	chr1_15393352	s01_15393352	1	15393352	Arbelaez et al. 2019
112	chr1_15883941	s01_15883941	1	15883941	Arbelaez et al. 2019
113	chr1_16113201	s01_16113201	1	16113201	Arbelaez et al. 2019
114	chr1_16144280	SK01_16144280	1	16144280	Yang et al. 2019
115	chr1_16284866	s01_16284866	1	16284866	Arbelaez et al. 2019
116	chr1_16596849	s01_16596849	1	16596849	Arbelaez et al. 2019
117	chr1_16677609	KJ01_055	1	16677609	Cheon et al. 2018
118	chr1_17008280	s01_17008280	1	17008280	Arbelaez et al. 2019
119	chr1_17081395	KJ01_056	1	17081395	Cheon et al. 2019
120	chr1_17219764	s01_17219764	1	17219764	Arbelaez et al. 2019
121	chr1_17387570	KJ01_057	1	17387570	Cheon et al. 2018
122	chr1_17426109	s01_17426109	1	17426109	Arbelaez et al. 2019
123	chr1_17540508	KJ01_058	1	17540508	Cheon et al. 2019
124	chr1_17540508	SK01_17540508	1	17540508	Yang et al. 2019
125	chr1_17743869	s01_17743869	1	17743869	Arbelaez et al. 2019
126	chr1_17904770	KJ01_059	1	17904770	Cheon et al. 2018
127	chr1_18102213	s01_18102213	1	18102213	Arbelaez et al. 2019
128	chr1_18332445	s01_18332445	1	18332445	Arbelaez et al. 2019
129	chr1_18501890	s01_18501890	1	18501890	Arbelaez et al. 2019
130	chr1_18537375	KGH01_008	1	18537375	Cheon et al. 2020
131	chr1_18614158	KGH01_009	1	18614158	Cheon et al. 2020
132	chr1_18639800	KGH01_010	1	18639800	Cheon et al. 2020
133	chr1_18672361	KGH01_011	1	18672361	Cheon et al. 2020
134	chr1_18801488	KJ01_061	1	18801488	Cheon et al. 2018
135	chr1_18891591	s01_18891591	1	18891591	Arbelaez et al. 2019
136	chr1_18944486	SK01_18944486	1	18944486	Yang et al. 2019
137	chr1_18999843	KJ01_062	1	18999843	Cheon et al. 2019
138	chr1_19095472	KJ01_063	1	19095472	Cheon et al. 2018
139	chr1_19269700	SK01_19269700	1	19269700	Yang et al. 2019
140	chr1_19308987	s01_19308987	1	19308987	Arbelaez et al. 2019
141	chr1_19985793	KJ01_065	1	19985793	Cheon et al. 2018
142	chr1_20022126	SK01_20022126	1	20022126	Yang et al. 2019
143	chr1_20262103	s01_20262103	1	20262103	Arbelaez et al. 2019
144	chr1_20278128	KJ01_066	1	20278128	Cheon et al. 2019
145	chr1_20418175	s01_20418175	1	20418175	Arbelaez et al. 2019
146	chr1_20488201	KJ01_067	1	20488201	Cheon et al. 2018
147	chr1_20562598	s01_20562598	1	20562598	Arbelaez et al. 2019
148	chr1_21011077	s01_21011077	1	21011077	Arbelaez et al. 2019
149	chr1_21109231	KJ01_069	1	21109231	Cheon et al. 2018
150	chr1_21361944	KJ01_071	1	21361944	Cheon et al. 2018
151	chr1_22048209	KJ01_073	1	22048209	Cheon et al. 2018
152	chr1_22328417	s01_22328417	1	22328417	Arbelaez et al. 2019
153	chr1_22359292	KJS01_009	1	22359292	Cheon et al. 2020
154	chr1_22380833	SK01_22380833	1	22380833	Yang et al. 2019
155	chr1_22453166	SK01_22453166	1	22453166	Yang et al. 2019
156	chr1_22554065	s01_22554065	1	22554065	Arbelaez et al. 2019
157	chr1_22645446	KJS01_010	1	22645446	Cheon et al. 2020
158	chr1_22829240	s01_22829240	1	22829240	Arbelaez et al. 2019
159	chr1_22955593	SK01_22955593	1	22955593	Yang et al. 2019
160	chr1_23091103	s01_23091103	1	23091103	Arbelaez et al. 2019
161	chr1_23239662	KJ01_074	1	23239662	Cheon et al. 2019
162	chr1_23240729	s01_23240729	1	23240729	Arbelaez et al. 2019
163	chr1_23434283	KJ01_075	1	23434283	Cheon et al. 2018
164	chr1_23656773	s01_23656773	1	23656773	Arbelaez et al. 2019
165	chr1_23672875	KJ01_076	1	23672875	Cheon et al. 2019
166	chr1_23750419	KGH01_012	1	23750419	Cheon et al. 2020
167	chr1_23770117	KGH01_013	1	23770117	Cheon et al. 2020
168	chr1_23788044	KGH01_014	1	23788044	Cheon et al. 2020
169	chr1_23912768	KJ01_077	1	23912768	Cheon et al. 2018
170	chr1_24018937	KGH01_015	1	24018937	Cheon et al. 2020
171	chr1_24050118	s01_24050118	1	24050118	Arbelaez et al. 2019
172	chr1_24056268	SK01_24056268	1	24056268	Yang et al. 2019
173	chr1_24334625	KGH01_016	1	24334625	Cheon et al. 2020
174	chr1_24366725	KJ01_079	1	24366725	Cheon et al. 2018
175	chr1_24391090	KGH01_017	1	24391090	Cheon et al. 2020
176	chr1_24515673	s01_24515673	1	24515673	Arbelaez et al. 2019
177	chr1_24592710	KGH01_018	1	24592710	Cheon et al. 2020
178	chr1_24722142	s01_24722142	1	24722142	Arbelaez et al. 2019
179	chr1_24741254	KJ01_080	1	24741254	Cheon et al. 2019
180	chr1_24958106	KJ01_081	1	24958106	Cheon et al. 2018
181	chr1_25148569	SK01_25148569	1	25148569	Yang et al. 2019
182	chr1_25384027	SK01_25384027	1	25384027	Yang et al. 2019
183	chr1_25548141	KJS01_013	1	25548141	Cheon et al. 2020
184	chr1_25673334	SK01_25673334	1	25673334	Yang et al. 2019
185	chr1_25906183	KJS01_015	1	25906183	Cheon et al. 2020
186	chr1_26112748	KJS01_016	1	26112748	Cheon et al. 2020
187	chr1_26187514	s01_26187514	1	26187514	Arbelaez et al. 2019
188	chr1_26493696	KJS01_018	1	26493696	Cheon et al. 2020
189	chr1_26703729	KJS01_019	1	26703729	Cheon et al. 2020
190	chr1_26880460	SK01_26880460	1	26880460	Yang et al. 2019
191	chr1_26892988	KJS01_020	1	26892988	Cheon et al. 2020
192	chr1_27046296	s01_27046296	1	27046296	Arbelaez et al. 2019
193	chr1_27055210	KJ01_082	1	27055210	Cheon et al. 2019
194	chr1_27330724	s01_27330724	1	27330724	Arbelaez et al. 2019
195	chr1_27486960	KJ01_083	1	27486960	Cheon et al. 2018
196	chr1_28117617	KJ01_084	1	28117617	Cheon et al. 2019
197	chr1_28137217	SK01_28137217	1	28137217	Yang et al. 2019
198	chr1_28142020	s01_28142020	1	28142020	Arbelaez et al. 2019
199	chr1_28478660	s01_28478660	1	28478660	Arbelaez et al. 2019
200	chr1_28826738	s01_28826738	1	28826738	Arbelaez et al. 2019
201	chr1_29047992	KGH01_019	1	29047992	Cheon et al. 2020
202	chr1_30215191	KJ01_087	1	30215191	Cheon et al. 2018
203	chr1_30307657	KJ01_088	1	30307657	Cheon et al. 2019
204	chr1_30341513	s01_30341513	1	30341513	Arbelaez et al. 2019
205	chr1_30569798	s01_30569798	1	30569798	Arbelaez et al. 2019
206	chr1_31000992	KJS01_022	1	31000992	Cheon et al. 2020
207	chr1_31246608	KJS01_023	1	31246608	Cheon et al. 2020
208	chr1_31396842	s01_31396842	1	31396842	Arbelaez et al. 2019
209	chr1_31508266	KJS01_024	1	31508266	Cheon et al. 2020
210	chr1_31720419	KJS01_025	1	31720419	Cheon et al. 2020
211	chr1_31859289	KJ01_089	1	31859289	Cheon et al. 2018
212	chr1_31896769	KJ01_090	1	31896769	Cheon et al. 2019
213	chr1_32041358	s01_32041358	1	32041358	Arbelaez et al. 2019
214	chr1_32130527	KJ01_091	1	32130527	Cheon et al. 2018
215	chr1_32284104	SK01_32284104	1	32284104	Yang et al. 2019
216	chr1_32356312	KJ01_092	1	32356312	Cheon et al. 2019
217	chr1_32359998	s01_32359998	1	32359998	Arbelaez et al. 2019
218	chr1_32551664	KJ01_093	1	32551664	Cheon et al. 2018
219	chr1_32563460	s01_32563460	1	32563460	Arbelaez et al. 2019
220	chr1_32734306	KJ01_094	1	32734306	Cheon et al. 2019
221	chr1_32998897	KGH01_020	1	32998897	Cheon et al. 2020
222	chr1_33164035	s01_33164035	1	33164035	Arbelaez et al. 2019
223	chr1_33176515	KJ01_096	1	33176515	Cheon et al. 2019
224	chr1_33340511	KJ01_097	1	33340511	Cheon et al. 2018
225	chr1_33472174	s01_33472174	1	33472174	Arbelaez et al. 2019
226	chr1_33557575	KJ01_098	1	33557575	Cheon et al. 2019
227	chr1_33695501	s01_33695501	1	33695501	Arbelaez et al. 2019
228	chr1_33887084	KJ01_099	1	33887084	Cheon et al. 2018
229	chr1_33901317	s01_33901317	1	33901317	Arbelaez et al. 2019
230	chr1_34102017	KJ01_100	1	34102017	Cheon et al. 2019
231	chr1_34201543	s01_34201543	1	34201543	Arbelaez et al. 2019
232	chr1_34310167	KJ01_101	1	34310167	Cheon et al. 2018
233	chr1_34363755	s01_34363755	1	34363755	Arbelaez et al. 2019
234	chr1_34508997	s01_34508997	1	34508997	Arbelaez et al. 2019
235	chr1_34728965	KJ01_102	1	34728965	Cheon et al. 2019
236	chr1_34731512	KGH01_022	1	34731512	Cheon et al. 2020
237	chr1_34744713	KGH01_023	1	34744713	Cheon et al. 2020
238	chr1_34919159	KJ01_103	1	34919159	Cheon et al. 2018
239	chr1_35190113	KJ01_105	1	35190113	Cheon et al. 2018
240	chr1_35259107	s01_35259107	1	35259107	Arbelaez et al. 2019
241	chr1_35558484	SK01_35558484	1	35558484	Yang et al. 2019
242	chr1_35794891	s01_35794891	1	35794891	Arbelaez et al. 2019
243	chr1_35909958	KJ01_107	1	35909958	Cheon et al. 2018
244	chr1_36150523	s01_36150523	1	36150523	Arbelaez et al. 2019
245	chr1_36419842	s01_36419842	1	36419842	Arbelaez et al. 2019
246	chr1_36445259	SK01_36445259	1	36445259	Yang et al. 2019
247	chr1_36501158	KJ01_109	1	36501158	Cheon et al. 2018
248	chr1_36649551	KJ01_110	1	36649551	Cheon et al. 2019
249	chr1_36683412	SK01_36683412	1	36683412	Yang et al. 2019
250	chr1_37052448	KJ01_111	1	37052448	Cheon et al. 2018
251	chr1_37274755	s01_37274755	1	37274755	Arbelaez et al. 2019
252	chr1_37284842	KJS01_026	1	37284842	Cheon et al. 2020
253	chr1_37540963	KJS01_028	1	37540963	Cheon et al. 2020
254	chr1_37680628	s01_37680628	1	37680628	Arbelaez et al. 2019
255	chr1_37920337	s01_37920337	1	37920337	Arbelaez et al. 2019
256	chr1_37933342	SK01_37933342	1	37933342	Yang et al. 2019
257	chr1_38079312	KJ01_112	1	38079312	Cheon et al. 2019
258	chr1_38104765	KJ01_113	1	38104765	Cheon et al. 2018
259	chr1_38385081	sd1	1	38385081	Sasaki et al. 2002
260	chr1_38632196	s01_38632196	1	38632196	Arbelaez et al. 2019
261	chr1_38959045	SK01_38959045	1	38959045	Yang et al. 2019
262	chr1_39525573	SK01_39525573	1	39525573	Yang et al. 2019
263	chr1_39548506	s01_39548506	1	39548506	Arbelaez et al. 2019
264	chr1_39622533	KJ01_115	1	39622533	Cheon et al. 2018
265	chr1_39810719	KJ01_116	1	39810719	Cheon et al. 2019
266	chr1_39943861	KGH01_024	1	39943861	Cheon et al. 2020
267	chr1_39955529	s01_39955529	1	39955529	Arbelaez et al. 2019
268	chr1_40089944	KJ01_117	1	40089944	Cheon et al. 2018
269	chr1_40437865	KJ01_119	1	40437865	Cheon et al. 2018
270	chr1_40699488	s01_40699488	1	40699488	Arbelaez et al. 2019
271	chr1_40733249	KJ01_120	1	40733249	Cheon et al. 2019
272	chr1_41020155	s01_41020155	1	41020155	Arbelaez et al. 2019
273	chr1_41026337	SK01_41026337	1	41026337	Yang et al. 2019
274	chr1_41090615	KGH01_025	1	41090615	Cheon et al. 2020
275	chr1_41138835	KJ01_121	1	41138835	Cheon et al. 2018
276	chr1_41371769	KJ01_122	1	41371769	Cheon et al. 2019
277	chr1_41546787	KJ01_123	1	41546787	Cheon et al. 2018
278	chr1_41628856	KJ01_124	1	41628856	Cheon et al. 2019
279	chr1_41822712	SK01_41822712	1	41822712	Yang et al. 2019
280	chr1_41911439	s01_41911439	1	41911439	Arbelaez et al. 2019
281	chr1_41979600	KJ01_125	1	41979600	Cheon et al. 2018
282	chr1_42234111	KJ01_126	1	42234111	Cheon et al. 2019
283	chr1_42357534	SK01_42357534	1	42357534	Yang et al. 2019
284	chr1_42425574	s01_42425574	1	42425574	Arbelaez et al. 2019
285	chr1_42482913	KJ01_127	1	42482913	Cheon et al. 2018
286	chr1_42555349	s01_42555349	1	42555349	Arbelaez et al. 2019
287	chr1_42581030	SK01_42581030	1	42581030	Yang et al. 2019
288	chr1_42661152	KJ01_128	1	42661152	Cheon et al. 2019
289	chr1_42877440	s01_42877440	1	42877440	Arbelaez et al. 2019
290	chr1_42946801	KJ01_129	1	42946801	Cheon et al. 2018
291	chr1_43074709	s01_43074709	1	43074709	Arbelaez et al. 2019
292	chr1_43140530	KJ01_130	1	43140530	Cheon et al. 2019
293	chr1_43200421	SK01_43200421	1	43200421	Yang et al. 2019
294	chr2_103273	s02_103273	2	103273	Arbelaez et al. 2019
295	chr2_118723	KJS02_001	2	118723	Cheon et al. 2020
296	chr2_316859	s02_316859	2	316859	Arbelaez et al. 2019
297	chr2_390336	KJS02_002	2	390336	Cheon et al. 2020
298	chr2_494373	s02_494373	2	494373	Arbelaez et al. 2019
299	chr2_603490	KJS02_003	2	603490	Cheon et al. 2020
300	chr2_629512	s02_629512	2	629512	Arbelaez et al. 2019
301	chr2_890901	s02_890901	2	890901	Arbelaez et al. 2019
302	chr2_1000481	SK02_1000481	2	1000481	Yang et al. 2019
303	chr2_1076260	SK02_1076260	2	1076260	Yang et al. 2019
304	chr2_1082416	s02_1082416	2	1082416	Arbelaez et al. 2019
305	chr2_1090736	SK02_1090736	2	1090736	Yang et al. 2019
306	chr2_1139715	KJS02_004	2	1139715	Cheon et al. 2020
307	chr2_1288670	s02_1288670	2	1288670	Arbelaez et al. 2019
308	chr2_1380527	s02_1380527	2	1380527	Arbelaez et al. 2019
309	chr2_1464369	KJS02_005	2	1464369	Cheon et al. 2020
310	chr2_1487009	s02_1487009	2	1487009	Arbelaez et al. 2019
311	chr2_1660713	s02_1660713	2	1660713	Arbelaez et al. 2019
312	chr2_1920981	KJS02_006	2	1920981	Cheon et al. 2020
313	chr2_1968779	SK02_1968779	2	1968779	Yang et al. 2019
314	chr2_2008370	s02_2008370	2	2008370	Arbelaez et al. 2019
315	chr2_2334960	s02_2334960	2	2334960	Arbelaez et al. 2019
316	chr2_2819095	s02_2819095	2	2819095	Arbelaez et al. 2019
317	chr2_2879584	SK02_2879584	2	2879584	Yang et al. 2019
318	chr2_3136771	s02_3136771	2	3136771	Arbelaez et al. 2019
319	chr2_3230775	SK02_3230775	2	3230775	Yang et al. 2019
320	chr2_3232811	KGH02_001	2	3232811	Cheon et al. 2020
321	chr2_3477202	s02_3477202	2	3477202	Arbelaez et al. 2019
322	chr2_3548115	KJ02_001	2	3548115	Cheon et al. 2018
323	chr2_3622167	KJ02_002	2	3622167	Cheon et al. 2019
324	chr2_3830712	s02_3830712	2	3830712	Arbelaez et al. 2019
325	chr2_4047646	s02_4047646	2	4047646	Arbelaez et al. 2019
326	chr2_4342883	s02_4342883	2	4342883	Arbelaez et al. 2019
327	chr2_4372712	KJ02_003	2	4372712	Cheon et al. 2018
328	chr2_4419382	KJ02_004	2	4419382	Cheon et al. 2019
329	chr2_4605390	SK02_4605390	2	4605390	Yang et al. 2019
330	chr2_4656692	KJ02_005	2	4656692	Cheon et al. 2018
331	chr2_4823175	s02_4823175	2	4823175	Arbelaez et al. 2019
332	chr2_4927125	KJ02_006	2	4927125	Cheon et al. 2019
333	chr2_4930742	s02_4930742	2	4930742	Arbelaez et al. 2019
334	chr2_5029300	SK02_5029300	2	5029300	Yang et al. 2019
335	chr2_5120420	KJ02_007	2	5120420	Cheon et al. 2018
336	chr2_5231169	s02_5231169	2	5231169	Arbelaez et al. 2019
337	chr2_5329403	KJ02_008	2	5329403	Cheon et al. 2019
338	chr2_5523756	KJ02_009	2	5523756	Cheon et al. 2018
339	chr2_5670594	KJ02_010	2	5670594	Cheon et al. 2019
340	chr2_5786547	SK02_5786547	2	5786547	Yang et al. 2019
341	chr2_5819810	KJ02_011	2	5819810	Cheon et al. 2018
342	chr2_5836334	s02_5836334	2	5836334	Arbelaez et al. 2019
343	chr2_6186335	s02_6186335	2	6186335	Arbelaez et al. 2019
344	chr2_6373446	s02_6373446	2	6373446	Arbelaez et al. 2019
345	chr2_6500738	KJ02_012	2	6500738	Cheon et al. 2019
346	chr2_6805305	s02_6805305	2	6805305	Arbelaez et al. 2019
347	chr2_7342223	s02_7342223	2	7342223	Arbelaez et al. 2019
348	chr2_7468550	SK02_7468550	2	7468550	Yang et al. 2019
349	chr2_7581871	KJS02_007	2	7581871	Cheon et al. 2020
350	chr2_7801801	KJ02_013	2	7801801	Cheon et al. 2018
351	chr2_7828021	KJ02_014	2	7828021	Cheon et al. 2019
352	chr2_8019748	s02_8019748	2	8019748	Arbelaez et al. 2019
353	chr2_8119760	SK02_8119760	2	8119760	Yang et al. 2019
354	chr2_8701699	SK02_8701699	2	8701699	Yang et al. 2019
355	chr2_8814718	s02_8814718	2	8814718	Arbelaez et al. 2019
356	chr2_8857888	KJS02_009	2	8857888	Cheon et al. 2020
357	chr2_8917955	KJS02_010	2	8917955	Cheon et al. 2020
358	chr2_8978321	SK02_8978321	2	8978321	Yang et al. 2019
359	chr2_9044730	SK02_9044730	2	9044730	Yang et al. 2019
360	chr2_9106318	KJ02_016	2	9106318	Cheon et al. 2019
361	chr2_9449360	KJ02_018	2	9449360	Cheon et al. 2019
362	chr2_9570228	s02_9570228	2	9570228	Arbelaez et al. 2019
363	chr2_9780295	KJ02_019	2	9780295	Cheon et al. 2018
364	chr2_9801099	s02_9801099	2	9801099	Arbelaez et al. 2019
365	chr2_9975660	s02_9975660	2	9975660	Arbelaez et al. 2019
366	chr2_9978736	KJ02_020	2	9978736	Cheon et al. 2019
367	chr2_10167522	SK02_10167522	2	10167522	Yang et al. 2019
368	chr2_10262031	KGH02_002	2	10262031	Cheon et al. 2020
369	chr2_10555263	s02_10555263	2	10555263	Arbelaez et al. 2019
370	chr2_10801112	KJ02_023	2	10801112	Cheon et al. 2018
371	chr2_10874369	s02_10874369	2	10874369	Arbelaez et al. 2019
372	chr2_11073926	KGH02_003	2	11073926	Cheon et al. 2020
373	chr2_11097886	KJ02_024	2	11097886	Cheon et al. 2019
374	chr2_11102648	s02_11102648	2	11102648	Arbelaez et al. 2019
375	chr2_11211324	KJ02_025	2	11211324	Cheon et al. 2018
376	chr2_11381586	KJ02_026	2	11381586	Cheon et al. 2019
377	chr2_11549357	KJS02_011	2	11549357	Cheon et al. 2020
378	chr2_11701123	s02_11701123	2	11701123	Arbelaez et al. 2019
379	chr2_11999446	SK02_11999446	2	11999446	Yang et al. 2019
380	chr2_12153399	KJS02_014	2	12153399	Cheon et al. 2020
381	chr2_13962476	s02_13962476	2	13962476	Arbelaez et al. 2019
382	chr2_14335102	KGH02_004	2	14335102	Cheon et al. 2020
383	chr2_15300681	KJS02_015	2	15300681	Cheon et al. 2020
384	chr2_15775411	SK02_15775411	2	15775411	Yang et al. 2019
385	chr2_16123749	KJS02_016	2	16123749	Cheon et al. 2020
386	chr2_16224316	s02_16224316	2	16224316	Arbelaez et al. 2019
387	chr2_16464872	s02_16464872	2	16464872	Arbelaez et al. 2019
388	chr2_16919033	s02_16919033	2	16919033	Arbelaez et al. 2019
389	chr2_17152814	SK02_17152814	2	17152814	Yang et al. 2019
390	chr2_17160895	s02_17160895	2	17160895	Arbelaez et al. 2019
391	chr2_17328724	KJS02_017	2	17328724	Cheon et al. 2020
392	chr2_17486274	KJS02_018	2	17486274	Cheon et al. 2020
393	chr2_17497082	SK02_17497082	2	17497082	Yang et al. 2019
394	chr2_17853792	KJS02_020	2	17853792	Cheon et al. 2020
395	chr2_18072082	KJS02_021	2	18072082	Cheon et al. 2020
396	chr2_18128941	KJS02_022	2	18128941	Cheon et al. 2020
397	chr2_18310026	KGH02_005	2	18310026	Cheon et al. 2020
398	chr2_18370293	s02_18370293	2	18370293	Arbelaez et al. 2019
399	chr2_18811812	s02_18811812	2	18811812	Arbelaez et al. 2019
400	chr2_18870899	SK02_18870899	2	18870899	Yang et al. 2019
401	chr2_19283769	s02_19283769	2	19283769	Arbelaez et al. 2019
402	chr2_19483986	KJ02_027	2	19483986	Cheon et al. 2018
403	chr2_19642635	s02_19642635	2	19642635	Arbelaez et al. 2019
404	chr2_19672436	KJ02_028	2	19672436	Cheon et al. 2019
405	chr2_19888551	KJ02_029	2	19888551	Cheon et al. 2018
406	chr2_19981768	s02_19981768	2	19981768	Arbelaez et al. 2019
407	chr2_20079102	KJ02_030	2	20079102	Cheon et al. 2019
408	chr2_20145859	s02_20145859	2	20145859	Arbelaez et al. 2019
409	chr2_20335697	KJ02_031	2	20335697	Cheon et al. 2018
410	chr2_20351059	SK02_20351059	2	20351059	Yang et al. 2019
411	chr2_20720720	SK02_20720720	2	20720720	Yang et al. 2019
412	chr2_20824958	s02_20824958	2	20824958	Arbelaez et al. 2019
413	chr2_21060669	s02_21060669	2	21060669	Arbelaez et al. 2019
414	chr2_21123989	KJ02_032	2	21123989	Cheon et al. 2019
415	chr2_21592733	KJ02_033	2	21592733	Cheon et al. 2018
416	chr2_21610852	SK02_21610852	2	21610852	Yang et al. 2019
417	chr2_21779087	KJ02_034	2	21779087	Cheon et al. 2019
418	chr2_21832777	s02_21832777	2	21832777	Arbelaez et al. 2019
419	chr2_21983655	KJ02_035	2	21983655	Cheon et al. 2018
420	chr2_22218724	KJ02_036	2	22218724	Cheon et al. 2019
421	chr2_22334916	SK02_22334916	2	22334916	Yang et al. 2019
422	chr2_22336215	SK02_22336215	2	22336215	Yang et al. 2019
423	chr2_22340836	s02_22340836	2	22340836	Arbelaez et al. 2019
424	chr2_22584996	KJ02_038	2	22584996	Cheon et al. 2019
425	chr2_22684234	KJ02_039	2	22684234	Cheon et al. 2018
426	chr2_23073414	s02_23073414	2	23073414	Arbelaez et al. 2019
427	chr2_23078724	KJ02_040	2	23078724	Cheon et al. 2019
428	chr2_23182326	KJ02_041	2	23182326	Cheon et al. 2018
429	chr2_23396915	s02_23396915	2	23396915	Arbelaez et al. 2019
430	chr2_23538743	s02_23538743	2	23538743	Arbelaez et al. 2019
431	chr2_23599651	SK02_23599651	2	23599651	Yang et al. 2019
432	chr2_23739361	KJ02_042	2	23739361	Cheon et al. 2019
433	chr2_23850625	KJ02_043	2	23850625	Cheon et al. 2018
434	chr2_23852677	s02_23852677	2	23852677	Arbelaez et al. 2019
435	chr2_24062285	KJ02_044	2	24062285	Cheon et al. 2019
436	chr2_24100885	SK02_24100885	2	24100885	Yang et al. 2019
437	chr2_24168273	s02_24168273	2	24168273	Arbelaez et al. 2019
438	chr2_24236917	SK02_24236917	2	24236917	Yang et al. 2019
439	chr2_24264653	s02_24264653	2	24264653	Arbelaez et al. 2019
440	chr2_24278925	KJ02_045	2	24278925	Cheon et al. 2018
441	chr2_24478726	KJ02_046	2	24478726	Cheon et al. 2019
442	chr2_24517313	SK02_24517313	2	24517313	Yang et al. 2019
443	chr2_24529876	KGH02_008	2	24529876	Cheon et al. 2020
444	chr2_24582137	KJ02_047	2	24582137	Cheon et al. 2018
445	chr2_24720321	SK02_24720321	2	24720321	Yang et al. 2019
446	chr2_24739001	KGH02_009	2	24739001	Cheon et al. 2020
447	chr2_24772301	s02_24772301	2	24772301	Arbelaez et al. 2019
448	chr2_24884978	KJ02_048	2	24884978	Cheon et al. 2019
449	chr2_24887320	s02_24887320	2	24887320	Arbelaez et al. 2019
450	chr2_25019879	KJ02_049	2	25019879	Cheon et al. 2018
451	chr2_25162443	KJ02_050	2	25162443	Cheon et al. 2019
452	chr2_25193353	s02_25193353	2	25193353	Arbelaez et al. 2019
453	chr2_25415397	s02_25415397	2	25415397	Arbelaez et al. 2019
454	chr2_25510192	KJ02_051	2	25510192	Cheon et al. 2018
455	chr2_25949636	s02_25949636	2	25949636	Arbelaez et al. 2019
456	chr2_26003809	KJ02_052	2	26003809	Cheon et al. 2019
457	chr2_26176180	KJ02_053	2	26176180	Cheon et al. 2018
458	chr2_26252449	KJ02_054	2	26252449	Cheon et al. 2019
459	chr2_26406867	s02_26406867	2	26406867	Arbelaez et al. 2019
460	chr2_26684782	KJ02_056	2	26684782	Cheon et al. 2019
461	chr2_26691450	KJ02_057	2	26691450	Cheon et al. 2018
462	chr2_27049326	KJ02_058	2	27049326	Cheon et al. 2019
463	chr2_27208843	SK02_27208843	2	27208843	Yang et al. 2019
464	chr2_27272711	KJS02_023	2	27272711	Cheon et al. 2020
465	chr2_27548893	s02_27548893	2	27548893	Arbelaez et al. 2019
466	chr2_27883376	SK02_27883376	2	27883376	Yang et al. 2019
467	chr2_28049479	s02_28049479	2	28049479	Arbelaez et al. 2019
468	chr2_28099028	KJS02_027	2	28099028	Cheon et al. 2020
469	chr2_28173954	KJ02_061	2	28173954	Cheon et al. 2018
470	chr2_28211032	s02_28211032	2	28211032	Arbelaez et al. 2019
471	chr2_28329161	KJS02_028	2	28329161	Cheon et al. 2020
472	chr2_28487730	KJS02_029	2	28487730	Cheon et al. 2020
473	chr2_28778297	s02_28778297	2	28778297	Arbelaez et al. 2019
474	chr2_28920026	SK02_28920026	2	28920026	Yang et al. 2019
475	chr2_29187837	KJ02_062	2	29187837	Cheon et al. 2019
476	chr2_29343781	SK02_29343781	2	29343781	Yang et al. 2019
477	chr2_29415200	s02_29415200	2	29415200	Arbelaez et al. 2019
478	chr2_29568762	s02_29568762	2	29568762	Arbelaez et al. 2019
479	chr2_29718772	s02_29718772	2	29718772	Arbelaez et al. 2019
480	chr2_29736272	KJ02_064	2	29736272	Cheon et al. 2019
481	chr2_29958026	KJ02_065	2	29958026	Cheon et al. 2018
482	chr2_30196217	KJS02_031	2	30196217	Cheon et al. 2020
483	chr2_30295035	SK02_30295035	2	30295035	Yang et al. 2019
484	chr2_30345735	s02_30345735	2	30345735	Arbelaez et al. 2019
485	chr2_30530432	s02_30530432	2	30530432	Arbelaez et al. 2019
486	chr2_30815946	KJS02_034	2	30815946	Cheon et al. 2020
487	chr2_30869769	SK02_30869769	2	30869769	Yang et al. 2019
488	chr2_31004451	KJS02_035	2	31004451	Cheon et al. 2020
489	chr2_31113969	KJS02_036	2	31113969	Cheon et al. 2020
490	chr2_31135814	s02_31135814	2	31135814	Arbelaez et al. 2019
491	chr2_31269371	SK02_31269371	2	31269371	Yang et al. 2019
492	chr2_31403314	s02_31403314	2	31403314	Arbelaez et al. 2019
493	chr2_31546386	KJ02_068	2	31546386	Cheon et al. 2019
494	chr2_31678155	s02_31678155	2	31678155	Arbelaez et al. 2019
495	chr2_31914486	s02_31914486	2	31914486	Arbelaez et al. 2019
496	chr2_32060976	SK02_32060976	2	32060976	Yang et al. 2019
497	chr2_32101050	s02_32101050	2	32101050	Arbelaez et al. 2019
498	chr2_32118114	KJ02_071	2	32118114	Cheon et al. 2018
499	chr2_32303539	s02_32303539	2	32303539	Arbelaez et al. 2019
500	chr2_32531138	SK02_32531138	2	32531138	Yang et al. 2019
501	chr2_32599323	KGH02_010	2	32599323	Cheon et al. 2020
502	chr2_32959229	KGH02_011	2	32959229	Cheon et al. 2020
503	chr2_33035683	s02_33035683	2	33035683	Arbelaez et al. 2019
504	chr2_33082359	SK02_33082359	2	33082359	Yang et al. 2019
505	chr2_33142844	KJ02_073	2	33142844	Cheon et al. 2018
506	chr2_33208146	KJ02_074	2	33208146	Cheon et al. 2019
507	chr2_33465007	KJ02_075	2	33465007	Cheon et al. 2018
508	chr2_33923958	SK02_33923958	2	33923958	Yang et al. 2019
509	chr2_33973330	KJ02_077	2	33973330	Cheon et al. 2018
510	chr2_34072964	s02_34072964	2	34072964	Arbelaez et al. 2019
511	chr2_34425408	s02_34425408	2	34425408	Arbelaez et al. 2019
512	chr2_34483409	KGH02_012	2	34483409	Cheon et al. 2020
513	chr2_34635870	KJ02_079	2	34635870	Cheon et al. 2018
514	chr2_34687983	SK02_34687983	2	34687983	Yang et al. 2019
515	chr2_34707946	s02_34707946	2	34707946	Arbelaez et al. 2019
516	chr2_34745395	KGH02_013	2	34745395	Cheon et al. 2020
517	chr2_34759938	KGH02_014	2	34759938	Cheon et al. 2020
518	chr2_34865754	s02_34865754	2	34865754	Arbelaez et al. 2019
519	chr2_34868096	s02_34868096	2	34868096	Arbelaez et al. 2019
520	chr2_35036091	KGH02_015	2	35036091	Cheon et al. 2020
521	chr2_35088373	KGH02_016	2	35088373	Cheon et al. 2020
522	chr2_35094096	KGH02_017	2	35094096	Cheon et al. 2020
523	chr2_35115546	KGH02_018	2	35115546	Cheon et al. 2020
524	chr2_35115567	SK02_35115567	2	35115567	Yang et al. 2019
525	chr2_35187201	KJ02_081	2	35187201	Cheon et al. 2018
526	chr2_35216781	s02_35216781	2	35216781	Arbelaez et al. 2019
527	chr2_35401891	s02_35401891	2	35401891	Arbelaez et al. 2019
528	chr2_35501042	KGH02_019	2	35501042	Cheon et al. 2020
529	chr2_35568365	s02_35568365	2	35568365	Arbelaez et al. 2019
530	chr2_35587883	KJ02_083	2	35587883	Cheon et al. 2018
531	chr2_35762475	KGH02_020	2	35762475	Cheon et al. 2020
532	chr2_35788038	KJ02_084	2	35788038	Cheon et al. 2019
533	chr2_35812152	KGH02_021	2	35812152	Cheon et al. 2020
534	chr2_35933995	SK02_35933995	2	35933995	Yang et al. 2019
535	chr3_204361	KJ03_001	3	204361	Cheon et al. 2018
536	chr3_220026	SK03_220026	3	220026	Yang et al. 2019
537	chr3_422648	SK03_422648	3	422648	Yang et al. 2019
538	chr3_431667	SK03_431667	3	431667	Yang et al. 2019
539	chr3_484812	s03_484812	3	484812	Arbelaez et al. 2019
540	chr3_517088	KJ03_003	3	517088	Cheon et al. 2018
541	chr3_851785	s03_851785	3	851785	Arbelaez et al. 2019
542	chr3_872082	SK03_872082	3	872082	Yang et al. 2019
543	chr3_962390	KJ03_004	3	962390	Cheon et al. 2019
544	chr3_1164119	KJ03_005	3	1164119	Cheon et al. 2018
545	chr3_1270943	s03_1270943	3	1270943	Arbelaez et al. 2019
546	chr3_1481412	s03_1481412	3	1481412	Arbelaez et al. 2019
547	chr3_1545991	KJ03_006	3	1545991	Cheon et al. 2019
548	chr3_1729434	KJ03_007	3	1729434	Cheon et al. 2018
549	chr3_1761412	s03_1761412	3	1761412	Arbelaez et al. 2019
550	chr3_1789405	SK03_1789405	3	1789405	Yang et al. 2019
551	chr3_1923995	KJ03_008	3	1923995	Cheon et al. 2019
552	chr3_2086941	SK03_2086941	3	2086941	Yang et al. 2019
553	chr3_2151496	s03_2151496	3	2151496	Arbelaez et al. 2019
554	chr3_2373946	SK03_2373946	3	2373946	Yang et al. 2019
555	chr3_2727136	SK03_2727136	3	2727136	Yang et al. 2019
556	chr3_2745334	KJ03_010	3	2745334	Cheon et al. 2019
557	chr3_2885423	s03_2885423	3	2885423	Arbelaez et al. 2019
558	chr3_3382980	s03_3382980	3	3382980	Arbelaez et al. 2019
559	chr3_3595445	KJS03_003	3	3595445	Cheon et al. 2020
560	chr3_3655067	SK03_3655067	3	3655067	Yang et al. 2019
561	chr3_3657643	s03_3657643	3	3657643	Arbelaez et al. 2019
562	chr3_3704047	SK03_3704047	3	3704047	Yang et al. 2019
563	chr3_4007709	KJS03_005	3	4007709	Cheon et al. 2020
564	chr3_4047654	s03_4047654	3	4047654	Arbelaez et al. 2019
565	chr3_4213581	KJ03_013	3	4213581	Cheon et al. 2018
566	chr3_4321231	s03_4321231	3	4321231	Arbelaez et al. 2019
567	chr3_4338025	KGH03_001	3	4338025	Cheon et al. 2020
568	chr3_4409689	SK03_4409689	3	4409689	Yang et al. 2019
569	chr3_4427241	KJ03_015	3	4427241	Cheon et al. 2018
570	chr3_4788297	KJ03_016	3	4788297	Cheon et al. 2019
571	chr3_5109298	s03_5109298	3	5109298	Arbelaez et al. 2019
572	chr3_5452580	SK03_5452580	3	5452580	Yang et al. 2019
573	chr3_5676626	KJ03_017	3	5676626	Cheon et al. 2018
574	chr3_5824894	KJ03_018	3	5824894	Cheon et al. 2019
575	chr3_5880211	s03_5880211	3	5880211	Arbelaez et al. 2019
576	chr3_6251476	KJ03_019	3	6251476	Cheon et al. 2018
577	chr3_6283461	s03_6283461	3	6283461	Arbelaez et al. 2019
578	chr3_6418648	KJ03_020	3	6418648	Cheon et al. 2019
579	chr3_6633863	KJ03_021	3	6633863	Cheon et al. 2018
580	chr3_6830072	KJ03_022	3	6830072	Cheon et al. 2019
581	chr3_6902921	s03_6902921	3	6902921	Arbelaez et al. 2019
582	chr3_7440357	SK03_7440357	3	7440357	Yang et al. 2019
583	chr3_7605347	s03_7605347	3	7605347	Arbelaez et al. 2019
584	chr3_8182713	KGH03_002	3	8182713	Cheon et al. 2020
585	chr3_8398821	KGH03_004	3	8398821	Cheon et al. 2020
586	chr3_8414645	KGH03_005	3	8414645	Cheon et al. 2020
587	chr3_8434986	KGH03_006	3	8434986	Cheon et al. 2020
588	chr3_8532555	s03_8532555	3	8532555	Arbelaez et al. 2019
589	chr3_8711509	s03_8711509	3	8711509	Arbelaez et al. 2019
590	chr3_9026803	s03_9026803	3	9026803	Arbelaez et al. 2019
591	chr3_9333643	SK03_9333643	3	9333643	Yang et al. 2019
592	chr3_9375374	s03_9375374	3	9375374	Arbelaez et al. 2019
593	chr3_9601602	KJS03_006	3	9601602	Cheon et al. 2020
594	chr3_9636224	s03_9636224	3	9636224	Arbelaez et al. 2019
595	chr3_9751213	s03_9751213	3	9751213	Arbelaez et al. 2019
596	chr3_9878813	s03_9878813	3	9878813	Arbelaez et al. 2019
597	chr3_9913627	SK03_9913627	3	9913627	Yang et al. 2019
598	chr3_10184356	s03_10184356	3	10184356	Arbelaez et al. 2019
599	chr3_10467906	KJS03_007	3	10467906	Cheon et al. 2020
600	chr3_10544320	s03_10544320	3	10544320	Arbelaez et al. 2019
601	chr3_10798982	s03_10798982	3	10798982	Arbelaez et al. 2019
602	chr3_10819217	KJ03_023	3	10819217	Cheon et al. 2018
603	chr3_11025459	SK03_11025459	3	11025459	Yang et al. 2019
604	chr3_11031220	s03_11031220	3	11031220	Arbelaez et al. 2019
605	chr3_11644944	s03_11644944	3	11644944	Arbelaez et al. 2019
606	chr3_11697508	KJ03_026	3	11697508	Cheon et al. 2019
607	chr3_11851886	s03_11851886	3	11851886	Arbelaez et al. 2019
608	chr3_12345604	KJ03_029	3	12345604	Cheon et al. 2018
609	chr3_12564300	s03_12564300	3	12564300	Arbelaez et al. 2019
610	chr3_12785160	KJ03_031	3	12785160	Cheon et al. 2018
611	chr3_13045075	KJ03_032	3	13045075	Cheon et al. 2019
612	chr3_13122748	KJ03_033	3	13122748	Cheon et al. 2018
613	chr3_13156156	SK03_13156156	3	13156156	Yang et al. 2019
614	chr3_13224089	SK03_13224089	3	13224089	Yang et al. 2019
615	chr3_13776057	KJS03_009	3	13776057	Cheon et al. 2020
616	chr3_13932387	s03_13932387	3	13932387	Arbelaez et al. 2019
617	chr3_14106798	KJS03_010	3	14106798	Cheon et al. 2020
618	chr3_14169727	s03_14169727	3	14169727	Arbelaez et al. 2019
619	chr3_14171041	KJS03_011	3	14171041	Cheon et al. 2020
620	chr3_14288844	KJS03_012	3	14288844	Cheon et al. 2020
621	chr3_14554651	s03_14554651	3	14554651	Arbelaez et al. 2019
622	chr3_14603458	SK03_14603458	3	14603458	Yang et al. 2019
623	chr3_14777813	s03_14777813	3	14777813	Arbelaez et al. 2019
624	chr3_14830128	KJS03_013	3	14830128	Cheon et al. 2020
625	chr3_14904428	SK03_14904428	3	14904428	Yang et al. 2019
626	chr3_14932671	SK03_14932671	3	14932671	Yang et al. 2019
627	chr3_14990404	SK03_14990404	3	14990404	Yang et al. 2019
628	chr3_15001183	SK03_15001183	3	15001183	Yang et al. 2019
629	chr3_15074046	SK03_15074046	3	15074046	Yang et al. 2019
630	chr3_15106953	SK03_15106953	3	15106953	Yang et al. 2019
631	chr3_15365726	s03_15365726	3	15365726	Arbelaez et al. 2019
632	chr3_15397382	SK03_15397382	3	15397382	Yang et al. 2019
633	chr3_15485201	KJ03_034	3	15485201	Cheon et al. 2019
634	chr3_16075626	SK03_16075626	3	16075626	Yang et al. 2019
635	chr3_16458072	KGH03_008	3	16458072	Cheon et al. 2020
636	chr3_16551597	KGH03_009	3	16551597	Cheon et al. 2020
637	chr3_16708131	SK03_16708131	3	16708131	Yang et al. 2019
638	chr3_16733441	SK03_16733441	3	16733441	Yang et al. 2019
639	chr3_16877782	KJ03_035	3	16877782	Cheon et al. 2018
640	chr3_17092696	SK03_17092696	3	17092696	Yang et al. 2019
641	chr3_17262406	SK03_17262406	3	17262406	Yang et al. 2019
642	chr3_17273847	KJ03_036	3	17273847	Cheon et al. 2019
643	chr3_17307455	s03_17307455	3	17307455	Arbelaez et al. 2019
644	chr3_17439699	KJ03_037	3	17439699	Cheon et al. 2018
645	chr3_17786669	KJ03_038	3	17786669	Cheon et al. 2019
646	chr3_17827706	s03_17827706	3	17827706	Arbelaez et al. 2019
647	chr3_18053119	SK03_18053119	3	18053119	Yang et al. 2019
648	chr3_18107418	KJ03_039	3	18107418	Cheon et al. 2018
649	chr3_18273682	s03_18273682	3	18273682	Arbelaez et al. 2019
650	chr3_18629240	s03_18629240	3	18629240	Arbelaez et al. 2019
651	chr3_19143571	KJ03_043	3	19143571	Cheon et al. 2018
652	chr3_19245532	SK03_19245532	3	19245532	Yang et al. 2019
653	chr3_19428982	KJ03_044	3	19428982	Cheon et al. 2019
654	chr3_19862435	SK03_19862435	3	19862435	Yang et al. 2019
655	chr3_19929911	s03_19929911	3	19929911	Arbelaez et al. 2019
656	chr3_19960058	KJ03_046	3	19960058	Cheon et al. 2019
657	chr3_20053624	KJ03_047	3	20053624	Cheon et al. 2018
658	chr3_20363332	KJ03_048	3	20363332	Cheon et al. 2019
659	chr3_20832905	KJ03_050	3	20832905	Cheon et al. 2019
660	chr3_21003404	s03_21003404	3	21003404	Arbelaez et al. 2019
661	chr3_21258737	SK03_21258737	3	21258737	Yang et al. 2019
662	chr3_21309886	KJS03_016	3	21309886	Cheon et al. 2020
663	chr3_21465191	KJ03_053	3	21465191	Cheon et al. 2018
664	chr3_21728184	KJ03_054	3	21728184	Cheon et al. 2019
665	chr3_22050510	s03_22050510	3	22050510	Arbelaez et al. 2019
666	chr3_22234816	SK03_22234816	3	22234816	Yang et al. 2019
667	chr3_22264563	SK03_22264563	3	22264563	Yang et al. 2019
668	chr3_22407127	KJ03_057	3	22407127	Cheon et al. 2018
669	chr3_22542344	SK03_22542344	3	22542344	Yang et al. 2019
670	chr3_22586460	KJ03_058	3	22586460	Cheon et al. 2019
671	chr3_22633713	s03_22633713	3	22633713	Arbelaez et al. 2019
672	chr3_22641657	SK03_22641657	3	22641657	Yang et al. 2019
673	chr3_22783071	KJS03_018	3	22783071	Cheon et al. 2020
674	chr3_23037368	s03_23037368	3	23037368	Arbelaez et al. 2019
675	chr3_23354868	s03_23354868	3	23354868	Arbelaez et al. 2019
676	chr3_23491435	KJS03_020	3	23491435	Cheon et al. 2020
677	chr3_23851835	s03_23851835	3	23851835	Arbelaez et al. 2019
678	chr3_23957624	KJS03_022	3	23957624	Cheon et al. 2020
679	chr3_24172246	KJS03_023	3	24172246	Cheon et al. 2020
680	chr3_24294753	KJ03_060	3	24294753	Cheon et al. 2019
681	chr3_24413888	s03_24413888	3	24413888	Arbelaez et al. 2019
682	chr3_24682521	s03_24682521	3	24682521	Arbelaez et al. 2019
683	chr3_24699522	KJ03_062	3	24699522	Cheon et al. 2019
684	chr3_24702097	SK03_24702097	3	24702097	Yang et al. 2019
685	chr3_25091244	KJS03_024	3	25091244	Cheon et al. 2020
686	chr3_25157655	s03_25157655	3	25157655	Arbelaez et al. 2019
687	chr3_25259336	s03_25259336	3	25259336	Arbelaez et al. 2019
688	chr3_25288125	KJ03_063	3	25288125	Cheon et al. 2018
689	chr3_25317391	KJ03_064	3	25317391	Cheon et al. 2019
690	chr3_25395900	KGH03_010	3	25395900	Cheon et al. 2020
691	chr3_25530777	s03_25530777	3	25530777	Arbelaez et al. 2019
692	chr3_25833182	s03_25833182	3	25833182	Arbelaez et al. 2019
693	chr3_25983847	KJ03_065	3	25983847	Cheon et al. 2018
694	chr3_26206682	SK03_26206682	3	26206682	Yang et al. 2019
695	chr3_26334305	s03_26334305	3	26334305	Arbelaez et al. 2019
696	chr3_26456796	s03_26456796	3	26456796	Arbelaez et al. 2019
697	chr3_26590992	s03_26590992	3	26590992	Arbelaez et al. 2019
698	chr3_26858590	KJ03_066	3	26858590	Cheon et al. 2019
699	chr3_26982172	s03_26982172	3	26982172	Arbelaez et al. 2019
700	chr3_27054692	SK03_27054692	3	27054692	Yang et al. 2019
701	chr3_27275567	s03_27275567	3	27275567	Arbelaez et al. 2019
702	chr3_27494934	s03_27494934	3	27494934	Arbelaez et al. 2019
703	chr3_27773851	SK03_27773851	3	27773851	Yang et al. 2019
704	chr3_27813704	s03_27813704	3	27813704	Arbelaez et al. 2019
705	chr3_27996878	KJS03_026	3	27996878	Cheon et al. 2020
706	chr3_28167520	KJ03_067	3	28167520	Cheon et al. 2018
707	chr3_28530956	KJ03_068	3	28530956	Cheon et al. 2019
708	chr3_28851199	s03_28851199	3	28851199	Arbelaez et al. 2019
709	chr3_28852757	SK03_28852757	3	28852757	Yang et al. 2019
710	chr3_29152266	s03_29152266	3	29152266	Arbelaez et al. 2019
711	chr3_29187252	KJS03_027	3	29187252	Cheon et al. 2020
712	chr3_29430694	s03_29430694	3	29430694	Arbelaez et al. 2019
713	chr3_30247826	s03_30247826	3	30247826	Arbelaez et al. 2019
714	chr3_30480853	SK03_30480853	3	30480853	Yang et al. 2019
715	chr3_30604896	s03_30604896	3	30604896	Arbelaez et al. 2019
716	chr3_31025197	s03_31025197	3	31025197	Arbelaez et al. 2019
717	chr3_31050704	SK03_31050704	3	31050704	Yang et al. 2019
718	chr3_31190989	s03_31190989	3	31190989	Arbelaez et al. 2019
719	chr3_31427789	s03_31427789	3	31427789	Arbelaez et al. 2019
720	chr3_31441266	SK03_31441266	3	31441266	Yang et al. 2019
721	chr3_31512460	KGH03_011	3	31512460	Cheon et al. 2020
722	chr3_31614921	s03_31614921	3	31614921	Arbelaez et al. 2019
723	chr3_31881886	SK03_31881886	3	31881886	Yang et al. 2019
724	chr3_31919761	s03_31919761	3	31919761	Arbelaez et al. 2019
725	chr3_32063693	s03_32063693	3	32063693	Arbelaez et al. 2019
726	chr3_32355773	KJ03_069	3	32355773	Cheon et al. 2018
727	chr3_32430702	s03_32430702	3	32430702	Arbelaez et al. 2019
728	chr3_32577650	s03_32577650	3	32577650	Arbelaez et al. 2019
729	chr3_32608218	KJS03_028	3	32608218	Cheon et al. 2020
730	chr3_32674916	SK03_32674916	3	32674916	Yang et al. 2019
731	chr3_32808105	KJS03_029	3	32808105	Cheon et al. 2020
732	chr3_32832500	s03_32832500	3	32832500	Arbelaez et al. 2019
733	chr3_33002005	KJS03_030	3	33002005	Cheon et al. 2020
734	chr3_33080942	s03_33080942	3	33080942	Arbelaez et al. 2019
735	chr3_33148842	KJS03_031	3	33148842	Cheon et al. 2020
736	chr3_33319900	s03_33319900	3	33319900	Arbelaez et al. 2019
737	chr3_33693747	SK03_33693747	3	33693747	Yang et al. 2019
738	chr3_33713486	s03_33713486	3	33713486	Arbelaez et al. 2019
739	chr3_33960369	SK03_33960369	3	33960369	Yang et al. 2019
740	chr3_34275405	s03_34275405	3	34275405	Arbelaez et al. 2019
741	chr3_34476308	s03_34476308	3	34476308	Arbelaez et al. 2019
742	chr3_34678981	s03_34678981	3	34678981	Arbelaez et al. 2019
743	chr3_34900043	KJS03_032	3	34900043	Cheon et al. 2020
744	chr3_35093761	s03_35093761	3	35093761	Arbelaez et al. 2019
745	chr3_35636092	s03_35636092	3	35636092	Arbelaez et al. 2019
746	chr3_35824355	s03_35824355	3	35824355	Arbelaez et al. 2019
747	chr3_35942128	KJS03_034	3	35942128	Cheon et al. 2020
748	chr3_36206765	s03_36206765	3	36206765	Arbelaez et al. 2019
749	chr4_8167	KJ04_001	4	8167	Cheon et al. 2018
750	chr4_193676	s04_193676	4	193676	Arbelaez et al. 2019
751	chr4_603494	s04_603494	4	603494	Arbelaez et al. 2019
752	chr4_864053	KJ04_004	4	864053	Cheon et al. 2019
753	chr4_998087	KJ04_006	4	998087	Cheon et al. 2019
754	chr4_1022225	s04_1022225	4	1022225	Arbelaez et al. 2019
755	chr4_1043226	KGH04_001	4	1043226	Cheon et al. 2020
756	chr4_1136986	s04_1136986	4	1136986	Arbelaez et al. 2019
757	chr4_1336178	KJ04_007	4	1336178	Cheon et al. 2018
758	chr4_1444825	KJ04_008	4	1444825	Cheon et al. 2019
759	chr4_1719865	s04_1719865	4	1719865	Arbelaez et al. 2019
760	chr4_1843334	KJ04_009	4	1843334	Cheon et al. 2018
761	chr4_1878622	KGH04_003	4	1878622	Cheon et al. 2020
762	chr4_2044263	KJ04_010	4	2044263	Cheon et al. 2019
763	chr4_2245964	KJ04_011	4	2245964	Cheon et al. 2018
764	chr4_2445754	KJ04_012	4	2445754	Cheon et al. 2019
765	chr4_2992621	KJ04_015	4	2992621	Cheon et al. 2018
766	chr4_3411505	s04_3411505	4	3411505	Arbelaez et al. 2019
767	chr4_3843536	KJ04_018	4	3843536	Cheon et al. 2019
768	chr4_4035257	KJ04_019	4	4035257	Cheon et al. 2018
769	chr4_4284661	KJ04_020	4	4284661	Cheon et al. 2019
770	chr4_4411950	SK04_4411950	4	4411950	Yang et al. 2019
771	chr4_4414154	SK04_4414154	4	4414154	Yang et al. 2019
772	chr4_4456304	s04_4456304	4	4456304	Arbelaez et al. 2019
773	chr4_4457978	SK04_4457978	4	4457978	Yang et al. 2019
774	chr4_4526234	KJ04_021	4	4526234	Cheon et al. 2018
775	chr4_4559723	SK04_4559723	4	4559723	Yang et al. 2019
776	chr4_4599886	SK04_4599886	4	4599886	Yang et al. 2019
777	chr4_4647693	SK04_4647693	4	4647693	Yang et al. 2019
778	chr4_4723318	KJ04_022	4	4723318	Cheon et al. 2019
779	chr4_4945262	KJ04_023	4	4945262	Cheon et al. 2018
780	chr4_5111222	s04_5111222	4	5111222	Arbelaez et al. 2019
781	chr4_5377293	KJ04_025	4	5377293	Cheon et al. 2018
782	chr4_5625104	s04_5625104	4	5625104	Arbelaez et al. 2019
783	chr4_5789508	KJ04_027	4	5789508	Cheon et al. 2018
784	chr4_6027557	s04_6027557	4	6027557	Arbelaez et al. 2019
785	chr4_6057384	SK04_6057384	4	6057384	Yang et al. 2019
786	chr4_6193569	s04_6193569	4	6193569	Arbelaez et al. 2019
787	chr4_6384872	KJ04_029	4	6384872	Cheon et al. 2018
788	chr4_6434512	KJ04_030	4	6434512	Cheon et al. 2019
789	chr4_6596219	s04_6596219	4	6596219	Arbelaez et al. 2019
790	chr4_7021579	KGH04_007	4	7021579	Cheon et al. 2020
791	chr4_7025113	KGH04_008	4	7025113	Cheon et al. 2020
792	chr4_7031851	KGH04_009	4	7031851	Cheon et al. 2020
793	chr4_7170237	s04_7170237	4	7170237	Arbelaez et al. 2019
794	chr4_7304413	s04_7304413	4	7304413	Arbelaez et al. 2019
795	chr4_7428150	SK04_7428150	4	7428150	Yang et al. 2019
796	chr4_7432489	KJ04_032	4	7432489	Cheon et al. 2019
797	chr4_7680596	KJ04_033	4	7680596	Cheon et al. 2018
798	chr4_7871436	s04_7871436	4	7871436	Arbelaez et al. 2019
799	chr4_8217877	s04_8217877	4	8217877	Arbelaez et al. 2019
800	chr4_8299964	KJ04_036	4	8299964	Cheon et al. 2019
801	chr4_8837857	SK04_8837857	4	8837857	Yang et al. 2019
802	chr4_8876854	s04_8876854	4	8876854	Arbelaez et al. 2019
803	chr4_9051840	KJ04_039	4	9051840	Cheon et al. 2018
804	chr4_9411427	KJ04_040	4	9411427	Cheon et al. 2019
805	chr4_9929207	KJ04_041	4	9929207	Cheon et al. 2018
806	chr4_10212164	KJ04_042	4	10212164	Cheon et al. 2019
807	chr4_10396788	SK04_10396788	4	10396788	Yang et al. 2019
808	chr4_10468507	s04_10468507	4	10468507	Arbelaez et al. 2019
809	chr4_10695483	KJ04_043	4	10695483	Cheon et al. 2018
810	chr4_10991011	s04_10991011	4	10991011	Arbelaez et al. 2019
811	chr4_11598520	KJ04_046	4	11598520	Cheon et al. 2019
812	chr4_11645506	s04_11645506	4	11645506	Arbelaez et al. 2019
813	chr4_11748452	SK04_11748452	4	11748452	Yang et al. 2019
814	chr4_11832332	KJ04_047	4	11832332	Cheon et al. 2018
815	chr4_11879947	s04_11879947	4	11879947	Arbelaez et al. 2019
816	chr4_11986644	s04_11986644	4	11986644	Arbelaez et al. 2019
817	chr4_12116458	KJ04_048	4	12116458	Cheon et al. 2019
818	chr4_12244931	s04_12244931	4	12244931	Arbelaez et al. 2019
819	chr4_12297152	s04_12297152	4	12297152	Arbelaez et al. 2019
820	chr4_12534847	KJS04_001	4	12534847	Cheon et al. 2020
821	chr4_12550310	SK04_12550310	4	12550310	Yang et al. 2019
822	chr4_12594753	s04_12594753	4	12594753	Arbelaez et al. 2019
823	chr4_12684621	s04_12684621	4	12684621	Arbelaez et al. 2019
824	chr4_12778516	KJS04_002	4	12778516	Cheon et al. 2020
825	chr4_13225981	SK04_13225981	4	13225981	Yang et al. 2019
826	chr4_13404485	KJS04_004	4	13404485	Cheon et al. 2020
827	chr4_13551673	s04_13551673	4	13551673	Arbelaez et al. 2019
828	chr4_13640788	KJS04_005	4	13640788	Cheon et al. 2020
829	chr4_13665093	s04_13665093	4	13665093	Arbelaez et al. 2019
830	chr4_13743580	SK04_13743580	4	13743580	Yang et al. 2019
831	chr4_13798238	KJS04_006	4	13798238	Cheon et al. 2020
832	chr4_14094091	SK04_14094091	4	14094091	Yang et al. 2019
833	chr4_14229856	s04_14229856	4	14229856	Arbelaez et al. 2019
834	chr4_14814591	s04_14814591	4	14814591	Arbelaez et al. 2019
835	chr4_15389648	s04_15389648	4	15389648	Arbelaez et al. 2019
836	chr4_15944977	s04_15944977	4	15944977	Arbelaez et al. 2019
837	chr4_16021780	KJS04_008	4	16021780	Cheon et al. 2020
838	chr4_16289829	s04_16289829	4	16289829	Arbelaez et al. 2019
839	chr4_16559384	s04_16559384	4	16559384	Arbelaez et al. 2019
840	chr4_16715200	s04_16715200	4	16715200	Arbelaez et al. 2019
841	chr4_16935377	SK04_16935377	4	16935377	Yang et al. 2019
842	chr4_16999319	KJS04_011	4	16999319	Cheon et al. 2020
843	chr4_17157142	KJS04_012	4	17157142	Cheon et al. 2020
844	chr4_17250626	KJ04_053	4	17250626	Cheon et al. 2018
845	chr4_17465113	s04_17465113	4	17465113	Arbelaez et al. 2019
846	chr4_17867962	KGH04_011	4	17867962	Cheon et al. 2020
847	chr4_17911519	s04_17911519	4	17911519	Arbelaez et al. 2019
848	chr4_18114091	KJ04_057	4	18114091	Cheon et al. 2018
849	chr4_18136052	s04_18136052	4	18136052	Arbelaez et al. 2019
850	chr4_18342721	SK04_18342721	4	18342721	Yang et al. 2019
851	chr4_18368972	KJS04_013	4	18368972	Cheon et al. 2020
852	chr4_18599368	KJS04_014	4	18599368	Cheon et al. 2020
853	chr4_18706317	s04_18706317	4	18706317	Arbelaez et al. 2019
854	chr4_18754459	SK04_18754459	4	18754459	Yang et al. 2019
855	chr4_18899549	KJS04_016	4	18899549	Cheon et al. 2020
856	chr4_19123643	s04_19123643	4	19123643	Arbelaez et al. 2019
857	chr4_19211611	KJS04_017	4	19211611	Cheon et al. 2020
858	chr4_19353709	s04_19353709	4	19353709	Arbelaez et al. 2019
859	chr4_19541114	KJ04_059	4	19541114	Cheon et al. 2018
860	chr4_19622432	KJ04_060	4	19622432	Cheon et al. 2019
861	chr4_19835234	SK04_19835234	4	19835234	Yang et al. 2019
862	chr4_20132588	KGH04_012	4	20132588	Cheon et al. 2020
863	chr4_20396474	SK04_20396474	4	20396474	Yang et al. 2019
864	chr4_20426399	SK04_20426399	4	20426399	Yang et al. 2019
865	chr4_20495719	KJ04_062	4	20495719	Cheon et al. 2019
866	chr4_20507218	s04_20507218	4	20507218	Arbelaez et al. 2019
867	chr4_21237749	s04_21237749	4	21237749	Arbelaez et al. 2019
868	chr4_21305446	KJS04_019	4	21305446	Cheon et al. 2020
869	chr4_21517348	s04_21517348	4	21517348	Arbelaez et al. 2019
870	chr4_21734385	KGH04_013	4	21734385	Cheon et al. 2020
871	chr4_21815986	SK04_21815986	4	21815986	Yang et al. 2019
872	chr4_21825277	KJ04_067	4	21825277	Cheon et al. 2018
873	chr4_21864875	s04_21864875	4	21864875	Arbelaez et al. 2019
874	chr4_22022073	KJ04_068	4	22022073	Cheon et al. 2019
875	chr4_22171220	KJ04_069	4	22171220	Cheon et al. 2018
876	chr4_22435296	SK04_22435296	4	22435296	Yang et al. 2019
877	chr4_22760222	KJS04_021	4	22760222	Cheon et al. 2020
878	chr4_22808095	s04_22808095	4	22808095	Arbelaez et al. 2019
879	chr4_23114102	KJS04_022	4	23114102	Cheon et al. 2020
880	chr4_23126372	KJS04_023	4	23126372	Cheon et al. 2020
881	chr4_23248365	s04_23248365	4	23248365	Arbelaez et al. 2019
882	chr4_23467371	SK04_23467371	4	23467371	Yang et al. 2019
883	chr4_23485871	KJS04_025	4	23485871	Cheon et al. 2020
884	chr4_23526762	s04_23526762	4	23526762	Arbelaez et al. 2019
885	chr4_23586775	KGH04_014	4	23586775	Cheon et al. 2020
886	chr4_23846299	s04_23846299	4	23846299	Arbelaez et al. 2019
887	chr4_23886835	KJ04_072	4	23886835	Cheon et al. 2019
888	chr4_24250223	KJ04_073	4	24250223	Cheon et al. 2018
889	chr4_24388444	KJ04_074	4	24388444	Cheon et al. 2019
890	chr4_24593462	KJ04_075	4	24593462	Cheon et al. 2018
891	chr4_24747105	KGH04_015	4	24747105	Cheon et al. 2020
892	chr4_24757162	KJ04_076	4	24757162	Cheon et al. 2019
893	chr4_24780440	KJ04_077	4	24780440	Cheon et al. 2018
894	chr4_24949703	SK04_24949703	4	24949703	Yang et al. 2019
895	chr4_25164916	KJS04_027	4	25164916	Cheon et al. 2020
896	chr4_25245272	s04_25245272	4	25245272	Arbelaez et al. 2019
897	chr4_25437295	s04_25437295	4	25437295	Arbelaez et al. 2019
898	chr4_25837976	KJ04_078	4	25837976	Cheon et al. 2019
899	chr4_25898378	SK04_25898378	4	25898378	Yang et al. 2019
900	chr4_25947245	KJS04_028	4	25947245	Cheon et al. 2020
901	chr4_26227955	KJS04_030	4	26227955	Cheon et al. 2020
902	chr4_26309089	s04_26309089	4	26309089	Arbelaez et al. 2019
903	chr4_26422660	KJS04_031	4	26422660	Cheon et al. 2020
904	chr4_26545849	s04_26545849	4	26545849	Arbelaez et al. 2019
905	chr4_26832471	s04_26832471	4	26832471	Arbelaez et al. 2019
906	chr4_26907634	SK04_26907634	4	26907634	Yang et al. 2019
907	chr4_27107735	KJ04_080	4	27107735	Cheon et al. 2019
908	chr4_27179949	KJ04_081	4	27179949	Cheon et al. 2018
909	chr4_27540988	s04_27540988	4	27540988	Arbelaez et al. 2019
910	chr4_27567935	SK04_27567935	4	27567935	Yang et al. 2019
911	chr4_27670273	KJ04_083	4	27670273	Cheon et al. 2018
912	chr4_27755621	KJ04_084	4	27755621	Cheon et al. 2019
913	chr4_27800401	SK04_27800401	4	27800401	Yang et al. 2019
914	chr4_28004788	s04_28004788	4	28004788	Arbelaez et al. 2019
915	chr4_28901886	s04_28901886	4	28901886	Arbelaez et al. 2019
916	chr4_29136343	KJ04_085	4	29136343	Cheon et al. 2018
917	chr4_29405465	KJS04_034	4	29405465	Cheon et al. 2020
918	chr4_29533215	s04_29533215	4	29533215	Arbelaez et al. 2019
919	chr4_29594692	KJS04_035	4	29594692	Cheon et al. 2020
920	chr4_29715617	s04_29715617	4	29715617	Arbelaez et al. 2019
921	chr4_29751343	KJS04_036	4	29751343	Cheon et al. 2020
922	chr4_29881066	s04_29881066	4	29881066	Arbelaez et al. 2019
923	chr4_30174083	s04_30174083	4	30174083	Arbelaez et al. 2019
924	chr4_30198373	KGH04_016	4	30198373	Cheon et al. 2020
925	chr4_30438901	s04_30438901	4	30438901	Arbelaez et al. 2019
926	chr4_30511827	KGH04_019	4	30511827	Cheon et al. 2020
927	chr4_30879875	s04_30879875	4	30879875	Arbelaez et al. 2019
928	chr4_31277196	KGH04_020	4	31277196	Cheon et al. 2020
929	chr4_31341572	KGH04_021	4	31341572	Cheon et al. 2020
930	chr4_31373467	SK04_31373467	4	31373467	Yang et al. 2019
931	chr4_31409353	KJ04_086	4	31409353	Cheon et al. 2019
932	chr4_31450795	KGH04_022	4	31450795	Cheon et al. 2020
933	chr4_31464748	KGH04_023	4	31464748	Cheon et al. 2020
934	chr4_31509863	s04_31509863	4	31509863	Arbelaez et al. 2019
935	chr4_31581963	KJ04_087	4	31581963	Cheon et al. 2018
936	chr4_31671271	KGH04_025	4	31671271	Cheon et al. 2020
937	chr4_31678447	s04_31678447	4	31678447	Arbelaez et al. 2019
938	chr4_31904771	SK04_31904771	4	31904771	Yang et al. 2019
939	chr4_32038496	s04_32038496	4	32038496	Arbelaez et al. 2019
940	chr4_32083594	KGH04_026	4	32083594	Cheon et al. 2020
941	chr4_32189893	s04_32189893	4	32189893	Arbelaez et al. 2019
942	chr4_32196610	KGH04_027	4	32196610	Cheon et al. 2020
943	chr4_32223351	KGH04_028	4	32223351	Cheon et al. 2020
944	chr4_32241178	KGH04_029	4	32241178	Cheon et al. 2020
945	chr4_32259816	KJ04_088	4	32259816	Cheon et al. 2019
946	chr4_32660337	KJ04_089	4	32660337	Cheon et al. 2018
947	chr4_32748870	KGH04_030	4	32748870	Cheon et al. 2020
948	chr4_32807202	KGH04_031	4	32807202	Cheon et al. 2020
949	chr4_32843112	SK04_32843112	4	32843112	Yang et al. 2019
950	chr4_33073892	s04_33073892	4	33073892	Arbelaez et al. 2019
951	chr4_33606106	KJ04_090	4	33606106	Cheon et al. 2019
952	chr4_33626126	SK04_33626126	4	33626126	Yang et al. 2019
953	chr4_33868056	SK04_33868056	4	33868056	Yang et al. 2019
954	chr4_34209963	KJ04_091	4	34209963	Cheon et al. 2018
955	chr4_34382077	KJ04_092	4	34382077	Cheon et al. 2019
956	chr4_34535832	KJ04_093	4	34535832	Cheon et al. 2018
957	chr4_34643455	s04_34643455	4	34643455	Arbelaez et al. 2019
958	chr4_34683717	SK04_34683717	4	34683717	Yang et al. 2019
959	chr4_34925111	s04_34925111	4	34925111	Arbelaez et al. 2019
960	chr4_35078228	KJ04_095	4	35078228	Cheon et al. 2018
961	chr4_35395197	s04_35395197	4	35395197	Arbelaez et al. 2019
962	chr5_7130	KJ05_001	5	7130	Cheon et al. 2018
963	chr5_44806	s05_44806	5	44806	Arbelaez et al. 2019
964	chr5_201193	s05_201193	5	201193	Arbelaez et al. 2019
965	chr5_207008	KJ05_002	5	207008	Cheon et al. 2019
966	chr5_437499	xa5_01	5	437499	Arbelaez et al. 2019
967	chr5_440644	s05_440644	5	440644	Arbelaez et al. 2019
968	chr5_591451	KJ05_003	5	591451	Cheon et al. 2018
969	chr5_593158	SK05_593158	5	593158	Yang et al. 2019
970	chr5_641051	KJ05_004	5	641051	Cheon et al. 2019
971	chr5_661832	s05_661832	5	661832	Arbelaez et al. 2019
972	chr5_922530	s05_922530	5	922530	Arbelaez et al. 2019
973	chr5_990754	SK05_990754	5	990754	Yang et al. 2019
974	chr5_1243736	KJ05_005	5	1243736	Cheon et al. 2018
975	chr5_1277191	s05_1277191	5	1277191	Arbelaez et al. 2019
976	chr5_1351848	SK05_1351848	5	1351848	Yang et al. 2019
977	chr5_1487229	s05_1487229	5	1487229	Arbelaez et al. 2019
978	chr5_1766082	KJ05_007	5	1766082	Cheon et al. 2018
979	chr5_2007954	KJ05_008	5	2007954	Cheon et al. 2019
980	chr5_2291156	s05_2291156	5	2291156	Arbelaez et al. 2019
981	chr5_2360311	KJ05_009	5	2360311	Cheon et al. 2018
982	chr5_2394819	KJ05_010	5	2394819	Cheon et al. 2019
983	chr5_2525289	s05_2525289	5	2525289	Arbelaez et al. 2019
984	chr5_2570081	SK05_2570081	5	2570081	Yang et al. 2019
985	chr5_2736952	SK05_2736952	5	2736952	Yang et al. 2019
986	chr5_2831817	KJ05_011	5	2831817	Cheon et al. 2018
987	chr5_2889262	s05_2889262	5	2889262	Arbelaez et al. 2019
988	chr5_3044947	KJ05_012	5	3044947	Cheon et al. 2019
989	chr5_3092113	s05_3092113	5	3092113	Arbelaez et al. 2019
990	chr5_3172800	KJS05_001	5	3172800	Cheon et al. 2020
991	chr5_3207628	SK05_3207628	5	3207628	Yang et al. 2019
992	chr5_3340204	SK05_3340204	5	3340204	Yang et al. 2019
993	chr5_3470087	s05_3470087	5	3470087	Arbelaez et al. 2019
994	chr5_3817643	s05_3817643	5	3817643	Arbelaez et al. 2019
995	chr5_4195403	SK05_4195403	5	4195403	Yang et al. 2019
996	chr5_4205413	s05_4205413	5	4205413	Arbelaez et al. 2019
997	chr5_4589783	s05_4589783	5	4589783	Arbelaez et al. 2019
998	chr5_4663967	KJS05_002	5	4663967	Cheon et al. 2020
999	chr5_4783888	KJ05_013	5	4783888	Cheon et al. 2018
1000	chr5_4794565	SK05_4794565	5	4794565	Yang et al. 2019
1001	chr5_4819475	s05_4819475	5	4819475	Arbelaez et al. 2019
1002	chr5_4953754	s05_4953754	5	4953754	Arbelaez et al. 2019
1003	chr5_4984766	SK05_4984766	5	4984766	Yang et al. 2019
1004	chr5_5339085	SK05_5339085	5	5339085	Yang et al. 2019
1005	chr5_5341385	SK05_5341385	5	5341385	Yang et al. 2019
1006	chr5_5354416	KJ05_014	5	5354416	Cheon et al. 2019
1007	chr5_5360210	KJ05_015	5	5360210	Cheon et al. 2018
1008	chr5_5364311	SK05_5364311	5	5364311	Yang et al. 2019
1009	chr5_5396755	SK05_5396755	5	5396755	Yang et al. 2019
1010	chr5_5425895	SK05_5425895	5	5425895	Yang et al. 2019
1011	chr5_5427770	SK05_5427770	5	5427770	Yang et al. 2019
1012	chr5_5441846	SK05_5441846	5	5441846	Yang et al. 2019
1013	chr5_5445097	SK05_5445097	5	5445097	Yang et al. 2019
1014	chr5_5472427	KJ05_016	5	5472427	Cheon et al. 2019
1015	chr5_5537852	SK05_5537852	5	5537852	Yang et al. 2019
1016	chr5_5984919	KJ05_017	5	5984919	Cheon et al. 2018
1017	chr5_6109831	KJ05_018	5	6109831	Cheon et al. 2019
1018	chr5_6129755	s05_6129755	5	6129755	Arbelaez et al. 2019
1019	chr5_6544781	s05_6544781	5	6544781	Arbelaez et al. 2019
1020	chr5_6562635	KJ05_019	5	6562635	Cheon et al. 2018
1021	chr5_6607675	s05_6607675	5	6607675	Arbelaez et al. 2019
1022	chr5_6674203	KJ05_020	5	6674203	Cheon et al. 2019
1023	chr5_6707417	SK05_6707417	5	6707417	Yang et al. 2019
1024	chr5_6833061	s05_6833061	5	6833061	Arbelaez et al. 2019
1025	chr5_7040154	KJ05_021	5	7040154	Cheon et al. 2018
1026	chr5_7194845	KJ05_022	5	7194845	Cheon et al. 2019
1027	chr5_7195992	s05_7195992	5	7195992	Arbelaez et al. 2019
1028	chr5_7328783	s05_7328783	5	7328783	Arbelaez et al. 2019
1029	chr5_7392294	KJ05_023	5	7392294	Cheon et al. 2018
1030	chr5_7411452	SK05_7411452	5	7411452	Yang et al. 2019
1031	chr5_7706179	s05_7706179	5	7706179	Arbelaez et al. 2019
1032	chr5_7756614	KJ05_025	5	7756614	Cheon et al. 2018
1033	chr5_8021900	KJ05_026	5	8021900	Cheon et al. 2019
1034	chr5_8080666	s05_8080666	5	8080666	Arbelaez et al. 2019
1035	chr5_8384781	s05_8384781	5	8384781	Arbelaez et al. 2019
1036	chr5_8385270	SK05_8385270	5	8385270	Yang et al. 2019
1037	chr5_8585466	s05_8585466	5	8585466	Arbelaez et al. 2019
1038	chr5_9214505	SK05_9214505	5	9214505	Yang et al. 2019
1039	chr5_9316830	KJS05_007	5	9316830	Cheon et al. 2020
1040	chr5_9519668	KJS05_008	5	9519668	Cheon et al. 2020
1041	chr5_9712988	s05_9712988	5	9712988	Arbelaez et al. 2019
1042	chr5_10539124	s05_10539124	5	10539124	Arbelaez et al. 2019
1043	chr5_10886331	s05_10886331	5	10886331	Arbelaez et al. 2019
1044	chr5_11098186	KJ05_028	5	11098186	Cheon et al. 2019
1045	chr5_11679660	s05_11679660	5	11679660	Arbelaez et al. 2019
1046	chr5_12087975	KJS05_015	5	12087975	Cheon et al. 2020
1047	chr5_12458461	KJS05_016	5	12458461	Cheon et al. 2020
1048	chr5_12691869	KJ05_029	5	12691869	Cheon et al. 2018
1049	chr5_13046184	SK05_13046184	5	13046184	Yang et al. 2019
1050	chr5_13232318	KJS05_018	5	13232318	Cheon et al. 2020
1051	chr5_13325546	s05_13325546	5	13325546	Arbelaez et al. 2019
1052	chr5_13602020	KJS05_019	5	13602020	Cheon et al. 2020
1053	chr5_13768744	s05_13768744	5	13768744	Arbelaez et al. 2019
1054	chr5_14301919	SK05_14301919	5	14301919	Yang et al. 2019
1055	chr5_14412355	s05_14412355	5	14412355	Arbelaez et al. 2019
1056	chr5_14541042	KJS05_022	5	14541042	Cheon et al. 2020
1057	chr5_14643984	s05_14643984	5	14643984	Arbelaez et al. 2019
1058	chr5_14928105	s05_14928105	5	14928105	Arbelaez et al. 2019
1059	chr5_15317821	KJ05_030	5	15317821	Cheon et al. 2019
1060	chr5_15556017	SK05_15556017	5	15556017	Yang et al. 2019
1061	chr5_15567844	s05_15567844	5	15567844	Arbelaez et al. 2019
1062	chr5_16055903	s05_16055903	5	16055903	Arbelaez et al. 2019
1063	chr5_16262586	SK05_16262586	5	16262586	Yang et al. 2019
1064	chr5_16326736	KJ05_032	5	16326736	Cheon et al. 2019
1065	chr5_16500527	s05_16500527	5	16500527	Arbelaez et al. 2019
1066	chr5_16512716	SK05_16512716	5	16512716	Yang et al. 2019
1067	chr5_16752221	s05_16752221	5	16752221	Arbelaez et al. 2019
1068	chr5_16955234	s05_16955234	5	16955234	Arbelaez et al. 2019
1069	chr5_17017106	s05_17017106	5	17017106	Arbelaez et al. 2019
1070	chr5_17252517	KJ05_033	5	17252517	Cheon et al. 2018
1071	chr5_17371944	KJ05_034	5	17371944	Cheon et al. 2019
1072	chr5_17637398	KJ05_035	5	17637398	Cheon et al. 2018
1073	chr5_17830875	SK05_17830875	5	17830875	Yang et al. 2019
1074	chr5_17834629	KJ05_036	5	17834629	Cheon et al. 2019
1075	chr5_17887666	KGH05_005	5	17887666	Cheon et al. 2020
1076	chr5_18031950	KJ05_037	5	18031950	Cheon et al. 2018
1077	chr5_18108765	s05_18108765	5	18108765	Arbelaez et al. 2019
1078	chr5_18405433	s05_18405433	5	18405433	Arbelaez et al. 2019
1079	chr5_18443082	KJ05_038	5	18443082	Cheon et al. 2019
1080	chr5_18623022	KJ05_039	5	18623022	Cheon et al. 2018
1081	chr5_18816269	s05_18816269	5	18816269	Arbelaez et al. 2019
1082	chr5_18905370	KJ05_040	5	18905370	Cheon et al. 2019
1083	chr5_18986036	KJ05_041	5	18986036	Cheon et al. 2018
1084	chr5_19098650	s05_19098650	5	19098650	Arbelaez et al. 2019
1085	chr5_19155333	s05_19155333	5	19155333	Arbelaez et al. 2019
1086	chr5_19160084	SK05_19160084	5	19160084	Yang et al. 2019
1087	chr5_19480980	KJ05_042	5	19480980	Cheon et al. 2019
1088	chr5_19516545	s05_19516545	5	19516545	Arbelaez et al. 2019
1089	chr5_19521378	KJ05_043	5	19521378	Cheon et al. 2018
1090	chr5_19723342	s05_19723342	5	19723342	Arbelaez et al. 2019
1091	chr5_19893809	KJ05_044	5	19893809	Cheon et al. 2019
1092	chr5_19974373	s05_19974373	5	19974373	Arbelaez et al. 2019
1093	chr5_20331215	s05_20331215	5	20331215	Arbelaez et al. 2019
1094	chr5_20493787	SK05_20493787	5	20493787	Yang et al. 2019
1095	chr5_20551103	s05_20551103	5	20551103	Arbelaez et al. 2019
1096	chr5_20774465	KJ05_046	5	20774465	Cheon et al. 2019
1097	chr5_20785235	KJ05_047	5	20785235	Cheon et al. 2018
1098	chr5_21280487	KJS05_028	5	21280487	Cheon et al. 2020
1099	chr5_21494622	s05_21494622	5	21494622	Arbelaez et al. 2019
1100	chr5_21562338	SK05_21562338	5	21562338	Yang et al. 2019
1101	chr5_21567051	KJS05_029	5	21567051	Cheon et al. 2020
1102	chr5_21766289	KJ05_050	5	21766289	Cheon et al. 2019
1103	chr5_22075948	s05_22075948	5	22075948	Arbelaez et al. 2019
1104	chr5_22081477	KJ05_051	5	22081477	Cheon et al. 2018
1105	chr5_22295097	s05_22295097	5	22295097	Arbelaez et al. 2019
1106	chr5_22543984	SK05_22543984	5	22543984	Yang et al. 2019
1107	chr5_22711811	s05_22711811	5	22711811	Arbelaez et al. 2019
1108	chr5_22805256	KJ05_053	5	22805256	Cheon et al. 2018
1109	chr5_23143060	s05_23143060	5	23143060	Arbelaez et al. 2019
1110	chr5_23216295	KJ05_054	5	23216295	Cheon et al. 2019
1111	chr5_23661597	s05_23661597	5	23661597	Arbelaez et al. 2019
1112	chr5_23727191	KJ05_055	5	23727191	Cheon et al. 2018
1113	chr5_23733220	SK05_23733220	5	23733220	Yang et al. 2019
1114	chr5_23824618	s05_23824618	5	23824618	Arbelaez et al. 2019
1115	chr5_24020057	KJ05_056	5	24020057	Cheon et al. 2019
1116	chr5_24070572	SK05_24070572	5	24070572	Yang et al. 2019
1117	chr5_24090514	s05_24090514	5	24090514	Arbelaez et al. 2019
1118	chr5_24196872	KJ05_057	5	24196872	Cheon et al. 2018
1119	chr5_24231845	KJ05_058	5	24231845	Cheon et al. 2019
1120	chr5_24773184	KJ05_059	5	24773184	Cheon et al. 2018
1121	chr5_24999987	KJ05_060	5	24999987	Cheon et al. 2019
1122	chr5_25215570	SK05_25215570	5	25215570	Yang et al. 2019
1123	chr5_25234430	s05_25234430	5	25234430	Arbelaez et al. 2019
1124	chr5_25246244	KJ05_061	5	25246244	Cheon et al. 2018
1125	chr5_25852536	KJ05_063	5	25852536	Cheon et al. 2018
1126	chr5_25956535	KJ05_064	5	25956535	Cheon et al. 2019
1127	chr5_26029645	KJ05_065	5	26029645	Cheon et al. 2018
1128	chr5_26185802	s05_26185802	5	26185802	Arbelaez et al. 2019
1129	chr5_26260986	SK05_26260986	5	26260986	Yang et al. 2019
1130	chr5_26390859	KJ05_066	5	26390859	Cheon et al. 2019
1131	chr5_26813227	KJ05_067	5	26813227	Cheon et al. 2018
1132	chr5_27086886	s05_27086886	5	27086886	Arbelaez et al. 2019
1133	chr5_27289052	s05_27289052	5	27289052	Arbelaez et al. 2019
1134	chr5_27531788	s05_27531788	5	27531788	Arbelaez et al. 2019
1135	chr5_27627633	s05_27627633	5	27627633	Arbelaez et al. 2019
1136	chr5_27742506	SK05_27742506	5	27742506	Yang et al. 2019
1137	chr5_27795820	KJ05_071	5	27795820	Cheon et al. 2018
1138	chr5_27899049	s05_27899049	5	27899049	Arbelaez et al. 2019
1139	chr5_27944747	KJ05_072	5	27944747	Cheon et al. 2019
1140	chr5_28101376	s05_28101376	5	28101376	Arbelaez et al. 2019
1141	chr5_28344771	s05_28344771	5	28344771	Arbelaez et al. 2019
1142	chr5_28383107	KJ05_074	5	28383107	Cheon et al. 2019
1143	chr5_28560614	KJ05_075	5	28560614	Cheon et al. 2018
1144	chr5_28642522	s05_28642522	5	28642522	Arbelaez et al. 2019
1145	chr5_28718002	KJ05_076	5	28718002	Cheon et al. 2019
1146	chr5_28772543	s05_28772543	5	28772543	Arbelaez et al. 2019
1147	chr5_28816449	KJS05_030	5	28816449	Cheon et al. 2020
1148	chr5_28853059	KJS05_031	5	28853059	Cheon et al. 2020
1149	chr5_29017036	SK05_29017036	5	29017036	Yang et al. 2019
1150	chr5_29061672	s05_29061672	5	29061672	Arbelaez et al. 2019
1151	chr5_29100308	s05_29100308	5	29100308	Arbelaez et al. 2019
1152	chr5_29217223	KJS05_032	5	29217223	Cheon et al. 2020
1153	chr5_29490231	s05_29490231	5	29490231	Arbelaez et al. 2019
1154	chr5_29497783	SK05_29497783	5	29497783	Yang et al. 2019
1155	chr5_29590621	KJS05_033	5	29590621	Cheon et al. 2020
1156	chr6_244274	s06_244274	6	244274	Arbelaez et al. 2019
1157	chr6_382564	SK06_382564	6	382564	Yang et al. 2019
1158	chr6_395890	SK06_395890	6	395890	Yang et al. 2019
1159	chr6_400753	s06_400753	6	400753	Arbelaez et al. 2019
1160	chr6_454048	SK06_454048	6	454048	Yang et al. 2019
1161	chr6_637769	KJ06_004	6	637769	Cheon et al. 2019
1162	chr6_638510	SK06_638510	6	638510	Yang et al. 2019
1163	chr6_646915	s06_646915	6	646915	Arbelaez et al. 2019
1164	chr6_647869	SK06_647869	6	647869	Yang et al. 2019
1165	chr6_662221	SK06_662221	6	662221	Yang et al. 2019
1166	chr6_677288	s06_677288	6	677288	Arbelaez et al. 2019
1167	chr6_701439	SK06_701439	6	701439	Yang et al. 2019
1168	chr6_873670	SK06_873670	6	873670	Yang et al. 2019
1169	chr6_1038324	KJ06_005	6	1038324	Cheon et al. 2018
1170	chr6_1114863	KJ06_006	6	1114863	Cheon et al. 2019
1171	chr6_1266434	KJ06_007	6	1266434	Cheon et al. 2018
1172	chr6_1272777	s06_1272777	6	1272777	Arbelaez et al. 2019
1173	chr6_1349980	SK06_1349980	6	1349980	Yang et al. 2019
1174	chr6_1372731	SK06_1372731	6	1372731	Yang et al. 2019
1175	chr6_1378891	s06_1378891	6	1378891	Arbelaez et al. 2019
1176	chr6_1455037	KJS06_001	6	1455037	Cheon et al. 2020
1177	chr6_1471478	SK06_1471478	6	1471478	Yang et al. 2019
1178	chr6_1509884	SK06_1509884	6	1509884	Yang et al. 2019
1179	chr6_1521855	s06_1521855	6	1521855	Arbelaez et al. 2019
1180	chr6_1529726	SK06_1529726	6	1529726	Yang et al. 2019
1181	chr6_1586456	SK06_1586456	6	1586456	Yang et al. 2019
1182	chr6_1587473	SK06_1587473	6	1587473	Yang et al. 2019
1183	chr6_1594975	SK06_1594975	6	1594975	Yang et al. 2019
1184	chr6_1765761	SK06_1765761	6	1765761	Yang et al. 2019
1185	chr6_1768006	SK06_1768006	6	1768006	Yang et al. 2019
1186	chr6_1768997	SK06_1768997	6	1768997	Yang et al. 2019
1187	chr6_1768998	Wxa_Wxg2	6	1768998	Arbelaez et al. 2019
1188	chr6_1962294	SK06_1962294	6	1962294	Yang et al. 2019
1189	chr6_1975737	SK06_1975737	6	1975737	Yang et al. 2019
1190	chr6_2025629	s06_2025629	6	2025629	Arbelaez et al. 2019
1191	chr6_2099853	SK06_2099853	6	2099853	Yang et al. 2019
1192	chr6_2430760	s06_2430760	6	2430760	Arbelaez et al. 2019
1193	chr6_2438361	KJS06_003	6	2438361	Cheon et al. 2020
1194	chr6_2535102	s06_2535102	6	2535102	Arbelaez et al. 2019
1195	chr6_2751641	KJ06_008	6	2751641	Cheon et al. 2019
1196	chr6_2781588	SK06_2781588	6	2781588	Yang et al. 2019
1197	chr6_2783620	s06_2783620	6	2783620	Arbelaez et al. 2019
1198	chr6_2808467	s06_2808467	6	2808467	Arbelaez et al. 2019
1199	chr6_2936067	KJ06_009	6	2936067	Cheon et al. 2018
1200	chr6_3140863	s06_3140863	6	3140863	Arbelaez et al. 2019
1201	chr6_3244503	s06_3244503	6	3244503	Arbelaez et al. 2019
1202	chr6_3277562	KJ06_010	6	3277562	Cheon et al. 2019
1203	chr6_3300607	KGH06_001	6	3300607	Cheon et al. 2020
1204	chr6_3306874	KGH06_002	6	3306874	Cheon et al. 2020
1205	chr6_3365147	KJ06_011	6	3365147	Cheon et al. 2018
1206	chr6_3431721	s06_3431721	6	3431721	Arbelaez et al. 2019
1207	chr6_3571407	KJ06_012	6	3571407	Cheon et al. 2019
1208	chr6_3590969	SK06_3590969	6	3590969	Yang et al. 2019
1209	chr6_3598843	s06_3598843	6	3598843	Arbelaez et al. 2019
1210	chr6_3632725	s06_3632725	6	3632725	Arbelaez et al. 2019
1211	chr6_3721346	s06_3721346	6	3721346	Arbelaez et al. 2019
1212	chr6_3754113	KJ06_013	6	3754113	Cheon et al. 2018
1213	chr6_3951547	s06_3951547	6	3951547	Arbelaez et al. 2019
1214	chr6_3977139	KJ06_014	6	3977139	Cheon et al. 2019
1215	chr6_4022325	SK06_4022325	6	4022325	Yang et al. 2019
1216	chr6_4076903	s06_4076903	6	4076903	Arbelaez et al. 2019
1217	chr6_4212402	SK06_4212402	6	4212402	Yang et al. 2019
1218	chr6_4637190	SK06_4637190	6	4637190	Yang et al. 2019
1219	chr6_4641044	s06_4641044	6	4641044	Arbelaez et al. 2019
1220	chr6_4708665	KJ06_015	6	4708665	Cheon et al. 2018
1221	chr6_4737177	SK06_4737177	6	4737177	Yang et al. 2019
1222	chr6_4757948	s06_4757948	6	4757948	Arbelaez et al. 2019
1223	chr6_4795998	SK06_4795998	6	4795998	Yang et al. 2019
1224	chr6_4870556	SK06_4870556	6	4870556	Yang et al. 2019
1225	chr6_4887859	s06_4887859	6	4887859	Arbelaez et al. 2019
1226	chr6_4892296	SK06_4892296	6	4892296	Yang et al. 2019
1227	chr6_4930358	SK06_4930358	6	4930358	Yang et al. 2019
1228	chr6_5036025	SK06_5036025	6	5036025	Yang et al. 2019
1229	chr6_5167941	KGH06_003	6	5167941	Cheon et al. 2020
1230	chr6_5195334	s06_5195334	6	5195334	Arbelaez et al. 2019
1231	chr6_5299280	KJ06_016	6	5299280	Cheon et al. 2019
1232	chr6_5495783	KJ06_017	6	5495783	Cheon et al. 2018
1233	chr6_5612809	SK06_5612809	6	5612809	Yang et al. 2019
1234	chr6_5707236	s06_5707236	6	5707236	Arbelaez et al. 2019
1235	chr6_5731693	KJ06_018	6	5731693	Cheon et al. 2019
1236	chr6_5874707	SK06_5874707	6	5874707	Yang et al. 2019
1237	chr6_5911796	KJ06_019	6	5911796	Cheon et al. 2018
1238	chr6_6093491	s06_6093491	6	6093491	Arbelaez et al. 2019
1239	chr6_6478676	SK06_6478676	6	6478676	Yang et al. 2019
1240	chr6_6508525	s06_6508525	6	6508525	Arbelaez et al. 2019
1241	chr6_6635225	KJ06_022	6	6635225	Cheon et al. 2019
1242	chr6_6749313	SK06_6749313	6	6749313	Yang et al. 2019
1243	chr6_6752756	SK06_6752756	6	6752756	Yang et al. 2019
1244	chr6_6752887	SK06_6752887	6	6752887	Yang et al. 2019
1245	chr6_6770568	KJ06_023	6	6770568	Cheon et al. 2018
1246	chr6_7003213	SK06_7003213	6	7003213	Yang et al. 2019
1247	chr6_7019948	SK06_7019948	6	7019948	Yang et al. 2019
1248	chr6_7229106	KJ06_025	6	7229106	Cheon et al. 2018
1249	chr6_7435718	KJ06_026	6	7435718	Cheon et al. 2019
1250	chr6_7629011	s06_7629011	6	7629011	Arbelaez et al. 2019
1251	chr6_7670859	SK06_7670859	6	7670859	Yang et al. 2019
1252	chr6_7708089	KJ06_027	6	7708089	Cheon et al. 2018
1253	chr6_7822950	KJ06_028	6	7822950	Cheon et al. 2019
1254	chr6_7837648	KJ06_029	6	7837648	Cheon et al. 2018
1255	chr6_8153078	s06_8153078	6	8153078	Arbelaez et al. 2019
1256	chr6_8334407	KJ06_030	6	8334407	Cheon et al. 2019
1257	chr6_8405025	s06_8405025	6	8405025	Arbelaez et al. 2019
1258	chr6_8481127	KJ06_031	6	8481127	Cheon et al. 2018
1259	chr6_8937542	KGH06_005	6	8937542	Cheon et al. 2020
1260	chr6_9035697	KJ06_033	6	9035697	Cheon et al. 2018
1261	chr6_9138291	KJ06_034	6	9138291	Cheon et al. 2019
1262	chr6_9222038	s06_9222038	6	9222038	Arbelaez et al. 2019
1263	chr6_9271476	KJ06_035	6	9271476	Cheon et al. 2018
1264	chr6_9289417	KGH06_007	6	9289417	Cheon et al. 2020
1265	chr6_9338330	SK06_9338330	6	9338330	Yang et al. 2019
1266	chr6_9529669	KJ06_036	6	9529669	Cheon et al. 2019
1267	chr6_9566049	KGH06_008	6	9566049	Cheon et al. 2020
1268	chr6_9652784	SK06_9652784	6	9652784	Yang et al. 2019
1269	chr6_9836381	s06_9836381	6	9836381	Arbelaez et al. 2019
1270	chr6_10006906	s06_10006906	6	10006906	Arbelaez et al. 2019
1271	chr6_10279890	KGH06_009	6	10279890	Cheon et al. 2020
1272	chr6_10319632	KJ06_038	6	10319632	Cheon et al. 2019
1273	chr6_10388662	SK06_10388662	6	10388662	Yang et al. 2019
1274	chr6_10389729	SK06_10389729	6	10389729	Yang et al. 2019
1275	chr6_10437834	KJ06_039	6	10437834	Cheon et al. 2018
1276	chr6_10447926	KGH06_010	6	10447926	Cheon et al. 2020
1277	chr6_10780360	KJ06_040	6	10780360	Cheon et al. 2019
1278	chr6_10966744	s06_10966744	6	10966744	Arbelaez et al. 2019
1279	chr6_11131403	s06_11131403	6	11131403	Arbelaez et al. 2019
1280	chr6_11287473	SK06_11287473	6	11287473	Yang et al. 2019
1281	chr6_11692013	s06_11692013	6	11692013	Arbelaez et al. 2019
1282	chr6_11914008	KJ06_041	6	11914008	Cheon et al. 2018
1283	chr6_12191074	SK06_12191074	6	12191074	Yang et al. 2019
1284	chr6_12329977	KJS06_006	6	12329977	Cheon et al. 2020
1285	chr6_12772228	KJS06_008	6	12772228	Cheon et al. 2020
1286	chr6_12927975	KJ06_044	6	12927975	Cheon et al. 2019
1287	chr6_12988857	KJ06_045	6	12988857	Cheon et al. 2018
1288	chr6_12989252	s06_12989252	6	12989252	Arbelaez et al. 2019
1289	chr6_13056699	SK06_13056699	6	13056699	Yang et al. 2019
1290	chr6_13351589	KJ06_047	6	13351589	Cheon et al. 2018
1291	chr6_13501409	KGH06_011	6	13501409	Cheon et al. 2020
1292	chr6_13702743	s06_13702743	6	13702743	Arbelaez et al. 2019
1293	chr6_13715792	KGH06_012	6	13715792	Cheon et al. 2020
1294	chr6_13814825	KJ06_049	6	13814825	Cheon et al. 2018
1295	chr6_14006726	s06_14006726	6	14006726	Arbelaez et al. 2019
1296	chr6_14151281	KGH06_013	6	14151281	Cheon et al. 2020
1297	chr6_14504992	s06_14504992	6	14504992	Arbelaez et al. 2019
1298	chr6_14773434	KGH06_015	6	14773434	Cheon et al. 2020
1299	chr6_14939243	SK06_14939243	6	14939243	Yang et al. 2019
1300	chr6_15196594	KJ06_055	6	15196594	Cheon et al. 2018
1301	chr6_15358704	s06_15358704	6	15358704	Arbelaez et al. 2019
1302	chr6_15408817	KJ06_056	6	15408817	Cheon et al. 2019
1303	chr6_15538142	SK06_15538142	6	15538142	Yang et al. 2019
1304	chr6_16220700	KJ06_059	6	16220700	Cheon et al. 2018
1305	chr6_16304717	s06_16304717	6	16304717	Arbelaez et al. 2019
1306	chr6_16417487	SK06_16417487	6	16417487	Yang et al. 2019
1307	chr6_16429856	KGH06_017	6	16429856	Cheon et al. 2020
1308	chr6_16440691	KGH06_018	6	16440691	Cheon et al. 2020
1309	chr6_16507688	KGH06_019	6	16507688	Cheon et al. 2020
1310	chr6_16609478	KJ06_061	6	16609478	Cheon et al. 2018
1311	chr6_16614854	SK06_16614854	6	16614854	Yang et al. 2019
1312	chr6_16806254	s06_16806254	6	16806254	Arbelaez et al. 2019
1313	chr6_16865337	KJ06_062	6	16865337	Cheon et al. 2019
1314	chr6_17005893	KGH06_020	6	17005893	Cheon et al. 2020
1315	chr6_17076390	s06_17076390	6	17076390	Arbelaez et al. 2019
1316	chr6_17163218	SK06_17163218	6	17163218	Yang et al. 2019
1317	chr6_17285715	KGH06_021	6	17285715	Cheon et al. 2020
1318	chr6_17698448	s06_17698448	6	17698448	Arbelaez et al. 2019
1319	chr6_17875066	KJ06_064	6	17875066	Cheon et al. 2019
1320	chr6_18066193	KGH06_022	6	18066193	Cheon et al. 2020
1321	chr6_18163084	KGH06_023	6	18163084	Cheon et al. 2020
1322	chr6_18746527	KJ06_066	6	18746527	Cheon et al. 2019
1323	chr6_19101835	KGH06_024	6	19101835	Cheon et al. 2020
1324	chr6_19182748	KJ06_067	6	19182748	Cheon et al. 2018
1325	chr6_19462276	s06_19462276	6	19462276	Arbelaez et al. 2019
1326	chr6_19665735	SK06_19665735	6	19665735	Yang et al. 2019
1327	chr6_19783820	KJ06_068	6	19783820	Cheon et al. 2019
1328	chr6_19989362	s06_19989362	6	19989362	Arbelaez et al. 2019
1329	chr6_20282850	KGH06_026	6	20282850	Cheon et al. 2020
1330	chr6_20462203	s06_20462203	6	20462203	Arbelaez et al. 2019
1331	chr6_20551516	KJS06_009	6	20551516	Cheon et al. 2020
1332	chr6_20800091	KJS06_010	6	20800091	Cheon et al. 2020
1333	chr6_20950922	SK06_20950922	6	20950922	Yang et al. 2019
1334	chr6_20976276	KJS06_011	6	20976276	Cheon et al. 2020
1335	chr6_21246829	s06_21246829	6	21246829	Arbelaez et al. 2019
1336	chr6_21491695	s06_21491695	6	21491695	Arbelaez et al. 2019
1337	chr6_21537543	KJS06_012	6	21537543	Cheon et al. 2020
1338	chr6_21690712	KJ06_070	6	21690712	Cheon et al. 2019
1339	chr6_21799623	KJ06_071	6	21799623	Cheon et al. 2018
1340	chr6_21818860	s06_21818860	6	21818860	Arbelaez et al. 2019
1341	chr6_22115798	KJ06_072	6	22115798	Cheon et al. 2019
1342	chr6_22155057	SK06_22155057	6	22155057	Yang et al. 2019
1343	chr6_22306256	KJ06_073	6	22306256	Cheon et al. 2018
1344	chr6_22371041	s06_22371041	6	22371041	Arbelaez et al. 2019
1345	chr6_22536653	KJ06_074	6	22536653	Cheon et al. 2019
1346	chr6_22670232	SK06_22670232	6	22670232	Yang et al. 2019
1347	chr6_22769496	KJ06_075	6	22769496	Cheon et al. 2018
1348	chr6_22952048	SK06_22952048	6	22952048	Yang et al. 2019
1349	chr6_23836891	KJ06_077	6	23836891	Cheon et al. 2018
1350	chr6_23854416	SK06_23854416	6	23854416	Yang et al. 2019
1351	chr6_23960981	KJ06_078	6	23960981	Cheon et al. 2019
1352	chr6_24003856	s06_24003856	6	24003856	Arbelaez et al. 2019
1353	chr6_24219798	s06_24219798	6	24219798	Arbelaez et al. 2019
1354	chr6_24268236	KJS06_013	6	24268236	Cheon et al. 2020
1355	chr6_24331932	s06_24331932	6	24331932	Arbelaez et al. 2019
1356	chr6_24502000	s06_24502000	6	24502000	Arbelaez et al. 2019
1357	chr6_24682553	KJS06_015	6	24682553	Cheon et al. 2020
1358	chr6_24997051	KJ06_079	6	24997051	Cheon et al. 2018
1359	chr6_25033082	SK06_25033082	6	25033082	Yang et al. 2019
1360	chr6_25203744	SK06_25203744	6	25203744	Yang et al. 2019
1361	chr6_25277863	s06_25277863	6	25277863	Arbelaez et al. 2019
1362	chr6_25433672	KJ06_080	6	25433672	Cheon et al. 2019
1363	chr6_25434460	s06_25434460	6	25434460	Arbelaez et al. 2019
1364	chr6_25793346	KJ06_081	6	25793346	Cheon et al. 2018
1365	chr6_26139965	s06_26139965	6	26139965	Arbelaez et al. 2019
1366	chr6_26266828	SK06_26266828	6	26266828	Yang et al. 2019
1367	chr6_26513610	s06_26513610	6	26513610	Arbelaez et al. 2019
1368	chr6_26747288	KJS06_017	6	26747288	Cheon et al. 2020
1369	chr6_26938344	Xa7_01	6	26938344	Arbelaez et al. 2019
1370	chr6_27209983	KJS06_019	6	27209983	Cheon et al. 2020
1371	chr6_27275515	s06_27275515	6	27275515	Arbelaez et al. 2019
1372	chr6_27326725	SK06_27326725	6	27326725	Yang et al. 2019
1373	chr6_27364485	s06_27364485	6	27364485	Arbelaez et al. 2019
1374	chr6_27368248	SK06_27368248	6	27368248	Yang et al. 2019
1375	chr6_27423294	KJS06_020	6	27423294	Cheon et al. 2020
1376	chr6_27438624	SK06_27438624	6	27438624	Yang et al. 2019
1377	chr6_27481339	SK06_27481339	6	27481339	Yang et al. 2019
1378	chr6_27498819	SK06_27498819	6	27498819	Yang et al. 2019
1379	chr6_27526542	SK06_27526542	6	27526542	Yang et al. 2019
1380	chr6_27526729	SK06_27526729	6	27526729	Yang et al. 2019
1381	chr6_27627615	SK06_27627615	6	27627615	Yang et al. 2019
1382	chr6_27761109	s06_27761109	6	27761109	Arbelaez et al. 2019
1383	chr6_28100960	s06_28100960	6	28100960	Arbelaez et al. 2019
1384	chr6_28107682	Xa7_05	6	28107682	Arbelaez et al. 2019
1385	chr6_28109159	SK06_28109159	6	28109159	Yang et al. 2019
1386	chr6_28201282	s06_28201282	6	28201282	Arbelaez et al. 2019
1387	chr6_28723997	s06_28723997	6	28723997	Arbelaez et al. 2019
1388	chr6_28796789	SK06_28796789	6	28796789	Yang et al. 2019
1389	chr6_28800531	SK06_28800531	6	28800531	Yang et al. 2019
1390	chr6_28871380	SK06_28871380	6	28871380	Yang et al. 2019
1391	chr6_28873249	SK06_28873249	6	28873249	Yang et al. 2019
1392	chr6_28879041	SK06_28879041	6	28879041	Yang et al. 2019
1393	chr6_28999672	SK06_28999672	6	28999672	Yang et al. 2019
1394	chr6_29000232	SK06_29000232	6	29000232	Yang et al. 2019
1395	chr6_29179807	KJ06_082	6	29179807	Cheon et al. 2019
1396	chr6_29208264	SK06_29208264	6	29208264	Yang et al. 2019
1397	chr6_29416997	s06_29416997	6	29416997	Arbelaez et al. 2019
1398	chr6_29648332	s06_29648332	6	29648332	Arbelaez et al. 2019
1399	chr6_29960908	KJ06_083	6	29960908	Cheon et al. 2018
1400	chr6_30176430	SK06_30176430	6	30176430	Yang et al. 2019
1401	chr6_30402598	KJ06_084	6	30402598	Cheon et al. 2019
1402	chr6_30809492	SK06_30809492	6	30809492	Yang et al. 2019
1403	chr7_3980	KJ07_001	7	3980	Cheon et al. 2018
1404	chr7_183081	KGH07_001	7	183081	Cheon et al. 2020
1405	chr7_184193	s07_184193	7	184193	Arbelaez et al. 2019
1406	chr7_216333	KJ07_002	7	216333	Cheon et al. 2019
1407	chr7_289217	KJ07_003	7	289217	Cheon et al. 2018
1408	chr7_472805	SK07_472805	7	472805	Yang et al. 2019
1409	chr7_514293	s07_514293	7	514293	Arbelaez et al. 2019
1410	chr7_770090	s07_770090	7	770090	Arbelaez et al. 2019
1411	chr7_866524	KJ07_004	7	866524	Cheon et al. 2019
1412	chr7_928984	KJ07_005	7	928984	Cheon et al. 2018
1413	chr7_940832	s07_940832	7	940832	Arbelaez et al. 2019
1414	chr7_1058718	s07_1058718	7	1058718	Arbelaez et al. 2019
1415	chr7_1113524	KJ07_006	7	1113524	Cheon et al. 2019
1416	chr7_1195861	s07_1195861	7	1195861	Arbelaez et al. 2019
1417	chr7_1317761	s07_1317761	7	1317761	Arbelaez et al. 2019
1418	chr7_1317768	KJ07_007	7	1317768	Cheon et al. 2018
1419	chr7_1432567	s07_1432567	7	1432567	Arbelaez et al. 2019
1420	chr7_1558687	s07_1558687	7	1558687	Arbelaez et al. 2019
1421	chr7_1611002	KJ07_008	7	1611002	Cheon et al. 2019
1422	chr7_1865306	s07_1865306	7	1865306	Arbelaez et al. 2019
1423	chr7_1867588	SK07_1867588	7	1867588	Yang et al. 2019
1424	chr7_2025847	KJ07_010	7	2025847	Cheon et al. 2019
1425	chr7_2128881	s07_2128881	7	2128881	Arbelaez et al. 2019
1426	chr7_2277644	KJ07_011	7	2277644	Cheon et al. 2018
1427	chr7_2331583	s07_2331583	7	2331583	Arbelaez et al. 2019
1428	chr7_2682973	KJ07_012	7	2682973	Cheon et al. 2019
1429	chr7_2749068	KJ07_013	7	2749068	Cheon et al. 2018
1430	chr7_3108600	KJ07_014	7	3108600	Cheon et al. 2019
1431	chr7_3190324	KGH07_003	7	3190324	Cheon et al. 2020
1432	chr7_3300456	KJ07_015	7	3300456	Cheon et al. 2018
1433	chr7_3431101	SK07_3431101	7	3431101	Yang et al. 2019
1434	chr7_3510553	KJ07_016	7	3510553	Cheon et al. 2019
1435	chr7_3616857	s07_3616857	7	3616857	Arbelaez et al. 2019
1436	chr7_3705757	KJ07_017	7	3705757	Cheon et al. 2018
1437	chr7_3789086	KJ07_018	7	3789086	Cheon et al. 2019
1438	chr7_4239741	KJ07_019	7	4239741	Cheon et al. 2018
1439	chr7_4448493	KJ07_020	7	4448493	Cheon et al. 2019
1440	chr7_4644793	KJ07_021	7	4644793	Cheon et al. 2018
1441	chr7_4770598	KJ07_022	7	4770598	Cheon et al. 2019
1442	chr7_5205982	KJS07_001	7	5205982	Cheon et al. 2020
1443	chr7_5442983	s07_5442983	7	5442983	Arbelaez et al. 2019
1444	chr7_5729056	s07_5729056	7	5729056	Arbelaez et al. 2019
1445	chr7_5895703	KJS07_003	7	5895703	Cheon et al. 2020
1446	chr7_5973717	SK07_5973717	7	5973717	Yang et al. 2019
1447	chr7_6029723	s07_6029723	7	6029723	Arbelaez et al. 2019
1448	chr7_6720823	KJ07_023	7	6720823	Cheon et al. 2018
1449	chr7_6991402	SK07_6991402	7	6991402	Yang et al. 2019
1450	chr7_7036726	KJ07_024	7	7036726	Cheon et al. 2019
1451	chr7_7317122	s07_7317122	7	7317122	Arbelaez et al. 2019
1452	chr7_7431843	KJ07_026	7	7431843	Cheon et al. 2019
1453	chr7_7951167	KGH07_004	7	7951167	Cheon et al. 2020
1454	chr7_8140854	s07_8140854	7	8140854	Arbelaez et al. 2019
1455	chr7_8320872	s07_8320872	7	8320872	Arbelaez et al. 2019
1456	chr7_8487862	s07_8487862	7	8487862	Arbelaez et al. 2019
1457	chr7_8546130	SK07_8546130	7	8546130	Yang et al. 2019
1458	chr7_8918567	KJ07_028	7	8918567	Cheon et al. 2019
1459	chr7_9147667	KJ07_029	7	9147667	Cheon et al. 2018
1460	chr7_9324798	KJ07_030	7	9324798	Cheon et al. 2019
1461	chr7_10088239	KJS07_007	7	10088239	Cheon et al. 2020
1462	chr7_10654969	KJS07_010	7	10654969	Cheon et al. 2020
1463	chr7_10865813	KJS07_011	7	10865813	Cheon et al. 2020
1464	chr7_11030430	KJ07_033	7	11030430	Cheon et al. 2018
1465	chr7_11052704	KJ07_034	7	11052704	Cheon et al. 2019
1466	chr7_11290725	s07_11290725	7	11290725	Arbelaez et al. 2019
1467	chr7_11294662	KJS07_012	7	11294662	Cheon et al. 2020
1468	chr7_11590149	KJS07_013	7	11590149	Cheon et al. 2020
1469	chr7_11777418	KJS07_014	7	11777418	Cheon et al. 2020
1470	chr7_11876978	KJS07_015	7	11876978	Cheon et al. 2020
1471	chr7_12740701	KJS07_018	7	12740701	Cheon et al. 2020
1472	chr7_12903072	KJS07_019	7	12903072	Cheon et al. 2020
1473	chr7_13324721	KGH07_005	7	13324721	Cheon et al. 2020
1474	chr7_13501565	KJS07_021	7	13501565	Cheon et al. 2020
1475	chr7_13701611	KJS07_022	7	13701611	Cheon et al. 2020
1476	chr7_13776155	SK07_13776155	7	13776155	Yang et al. 2019
1477	chr7_14432880	KJ07_037	7	14432880	Cheon et al. 2018
1478	chr7_14729119	s07_14729119	7	14729119	Arbelaez et al. 2019
1479	chr7_14739487	KJ07_038	7	14739487	Cheon et al. 2019
1480	chr7_15311521	KJ07_039	7	15311521	Cheon et al. 2018
1481	chr7_15340454	s07_15340454	7	15340454	Arbelaez et al. 2019
1482	chr7_15512750	KJ07_040	7	15512750	Cheon et al. 2019
1483	chr7_15712796	KJ07_041	7	15712796	Cheon et al. 2018
1484	chr7_15912596	KJ07_042	7	15912596	Cheon et al. 2019
1485	chr7_16023116	KJ07_043	7	16023116	Cheon et al. 2018
1486	chr7_16118477	KJ07_044	7	16118477	Cheon et al. 2019
1487	chr7_16313631	s07_16313631	7	16313631	Arbelaez et al. 2019
1488	chr7_16761823	KJ07_045	7	16761823	Cheon et al. 2018
1489	chr7_16957375	SK07_16957375	7	16957375	Yang et al. 2019
1490	chr7_16961376	KJ07_046	7	16961376	Cheon et al. 2019
1491	chr7_17277936	KJ07_047	7	17277936	Cheon et al. 2018
1492	chr7_17553044	KJ07_048	7	17553044	Cheon et al. 2019
1493	chr7_17654305	s07_17654305	7	17654305	Arbelaez et al. 2019
1494	chr7_17762865	KJ07_049	7	17762865	Cheon et al. 2018
1495	chr7_17877865	s07_17877865	7	17877865	Arbelaez et al. 2019
1496	chr7_17883910	KGH07_006	7	17883910	Cheon et al. 2020
1497	chr7_17957356	KJ07_050	7	17957356	Cheon et al. 2019
1498	chr7_18168615	KJ07_051	7	18168615	Cheon et al. 2018
1499	chr7_18208798	s07_18208798	7	18208798	Arbelaez et al. 2019
1500	chr7_18503646	SK07_18503646	7	18503646	Yang et al. 2019
1501	chr7_18689329	s07_18689329	7	18689329	Arbelaez et al. 2019
1502	chr7_18700679	KJ07_053	7	18700679	Cheon et al. 2018
1503	chr7_18895399	s07_18895399	7	18895399	Arbelaez et al. 2019
1504	chr7_18895470	KJ07_054	7	18895470	Cheon et al. 2019
1505	chr7_18927936	SK07_18927936	7	18927936	Yang et al. 2019
1506	chr7_19696332	KJ07_057	7	19696332	Cheon et al. 2018
1507	chr7_19741549	KGH07_007	7	19741549	Cheon et al. 2020
1508	chr7_19929771	KJ07_058	7	19929771	Cheon et al. 2019
1509	chr7_20124410	KJ07_059	7	20124410	Cheon et al. 2018
1510	chr7_20514892	s07_20514892	7	20514892	Arbelaez et al. 2019
1511	chr7_20648508	KJ07_060	7	20648508	Cheon et al. 2019
1512	chr7_20728990	KJ07_061	7	20728990	Cheon et al. 2018
1513	chr7_20809098	s07_20809098	7	20809098	Arbelaez et al. 2019
1514	chr7_21096419	KJ07_062	7	21096419	Cheon et al. 2019
1515	chr7_21104616	KGH07_008	7	21104616	Cheon et al. 2020
1516	chr7_21135004	s07_21135004	7	21135004	Arbelaez et al. 2019
1517	chr7_21280092	SK07_21280092	7	21280092	Yang et al. 2019
1518	chr7_21293691	KGH07_009	7	21293691	Cheon et al. 2020
1519	chr7_21345932	KGH07_010	7	21345932	Cheon et al. 2020
1520	chr7_21367800	KJ07_063	7	21367800	Cheon et al. 2018
1521	chr7_21385114	KGH07_011	7	21385114	Cheon et al. 2020
1522	chr7_21539524	s07_21539524	7	21539524	Arbelaez et al. 2019
1523	chr7_21671752	KGH07_012	7	21671752	Cheon et al. 2020
1524	chr7_21848848	s07_21848848	7	21848848	Arbelaez et al. 2019
1525	chr7_22057564	SK07_22057564	7	22057564	Yang et al. 2019
1526	chr7_22119347	RSTV1_01	7	22119347	Arbelaez et al. 2019
1527	chr7_22196332	KJ07_066	7	22196332	Cheon et al. 2019
1528	chr7_22277144	s07_22277144	7	22277144	Arbelaez et al. 2019
1529	chr7_22377948	KJ07_067	7	22377948	Cheon et al. 2018
1530	chr7_22593213	SK07_22593213	7	22593213	Yang et al. 2019
1531	chr7_22724630	KJ07_068	7	22724630	Cheon et al. 2019
1532	chr7_22811363	s07_22811363	7	22811363	Arbelaez et al. 2019
1533	chr7_23087994	s07_23087994	7	23087994	Arbelaez et al. 2019
1534	chr7_23471376	KJ07_069	7	23471376	Cheon et al. 2018
1535	chr7_23535052	s07_23535052	7	23535052	Arbelaez et al. 2019
1536	chr7_23785728	s07_23785728	7	23785728	Arbelaez et al. 2019
1537	chr7_23967813	KJ07_070	7	23967813	Cheon et al. 2019
1538	chr7_24026475	s07_24026475	7	24026475	Arbelaez et al. 2019
1539	chr7_24146716	KJ07_071	7	24146716	Cheon et al. 2018
1540	chr7_24313817	s07_24313817	7	24313817	Arbelaez et al. 2019
1541	chr7_24507157	s07_24507157	7	24507157	Arbelaez et al. 2019
1542	chr7_24575395	KGH07_013	7	24575395	Cheon et al. 2020
1543	chr7_24636588	s07_24636588	7	24636588	Arbelaez et al. 2019
1544	chr7_24653396	SK07_24653396	7	24653396	Yang et al. 2019
1545	chr7_24674898	KJ07_073	7	24674898	Cheon et al. 2018
1546	chr7_24775370	KJ07_074	7	24775370	Cheon et al. 2019
1547	chr7_24845026	SK07_24845026	7	24845026	Yang et al. 2019
1548	chr7_24968707	KJ07_075	7	24968707	Cheon et al. 2018
1549	chr7_25132131	KJ07_076	7	25132131	Cheon et al. 2019
1550	chr7_25319809	SK07_25319809	7	25319809	Yang et al. 2019
1551	chr7_25327472	KGH07_015	7	25327472	Cheon et al. 2020
1552	chr7_25339609	s07_25339609	7	25339609	Arbelaez et al. 2019
1553	chr7_25365395	SK07_25365395	7	25365395	Yang et al. 2019
1554	chr7_25381724	SK07_25381724	7	25381724	Yang et al. 2019
1555	chr7_25520705	KGH07_016	7	25520705	Cheon et al. 2020
1556	chr7_25647896	KJ07_078	7	25647896	Cheon et al. 2019
1557	chr7_25935801	s07_25935801	7	25935801	Arbelaez et al. 2019
1558	chr7_26092398	KJS07_027	7	26092398	Cheon et al. 2020
1559	chr7_26502762	SK07_26502762	7	26502762	Yang et al. 2019
1560	chr7_26611324	SK07_26611324	7	26611324	Yang et al. 2019
1561	chr7_26963593	KGH07_017	7	26963593	Cheon et al. 2020
1562	chr7_27021585	s07_27021585	7	27021585	Arbelaez et al. 2019
1563	chr7_27244224	KJS07_029	7	27244224	Cheon et al. 2020
1564	chr7_27883987	s07_27883987	7	27883987	Arbelaez et al. 2019
1565	chr7_27960534	KJ07_080	7	27960534	Cheon et al. 2019
1566	chr7_28091875	KJ07_081	7	28091875	Cheon et al. 2018
1567	chr7_28187994	s07_28187994	7	28187994	Arbelaez et al. 2019
1568	chr7_28197301	SK07_28197301	7	28197301	Yang et al. 2019
1569	chr7_28377055	KJ07_082	7	28377055	Cheon et al. 2019
1570	chr7_28409912	s07_28409912	7	28409912	Arbelaez et al. 2019
1571	chr7_29062014	s07_29062014	7	29062014	Arbelaez et al. 2019
1572	chr7_29318430	KJ07_084	7	29318430	Cheon et al. 2019
1573	chr7_29529536	KJ07_085	7	29529536	Cheon et al. 2018
1574	chr8_213580	s08_213580	8	213580	Arbelaez et al. 2019
1575	chr8_269238	KGH08_001	8	269238	Cheon et al. 2020
1576	chr8_528441	s08_528441	8	528441	Arbelaez et al. 2019
1577	chr8_658032	s08_658032	8	658032	Arbelaez et al. 2019
1578	chr8_730526	SK08_730526	8	730526	Yang et al. 2019
1579	chr8_811201	s08_811201	8	811201	Arbelaez et al. 2019
1580	chr8_927616	SK08_927616	8	927616	Yang et al. 2019
1581	chr8_1044621	KJ08_002	8	1044621	Cheon et al. 2019
1582	chr8_1088007	s08_1088007	8	1088007	Arbelaez et al. 2019
1583	chr8_1198055	s08_1198055	8	1198055	Arbelaez et al. 2019
1584	chr8_1282290	KJ08_003	8	1282290	Cheon et al. 2018
1585	chr8_1287293	KGH08_002	8	1287293	Cheon et al. 2020
1586	chr8_1670756	KJ08_004	8	1670756	Cheon et al. 2019
1587	chr8_1836529	s08_1836529	8	1836529	Arbelaez et al. 2019
1588	chr8_2107949	KJ08_007	8	2107949	Cheon et al. 2018
1589	chr8_2208785	s08_2208785	8	2208785	Arbelaez et al. 2019
1590	chr8_2479524	KJ08_008	8	2479524	Cheon et al. 2019
1591	chr8_2523368	KJ08_009	8	2523368	Cheon et al. 2018
1592	chr8_2673447	s08_2673447	8	2673447	Arbelaez et al. 2019
1593	chr8_2890468	SK08_2890468	8	2890468	Yang et al. 2019
1594	chr8_2940939	KJ08_011	8	2940939	Cheon et al. 2018
1595	chr8_3212821	s08_3212821	8	3212821	Arbelaez et al. 2019
1596	chr8_3275444	KJ08_012	8	3275444	Cheon et al. 2019
1597	chr8_3339157	KJ08_013	8	3339157	Cheon et al. 2018
1598	chr8_3365127	s08_3365127	8	3365127	Arbelaez et al. 2019
1599	chr8_3528585	KJ08_014	8	3528585	Cheon et al. 2019
1600	chr8_3682006	s08_3682006	8	3682006	Arbelaez et al. 2019
1601	chr8_3700395	KJ08_015	8	3700395	Cheon et al. 2018
1602	chr8_3702914	SK08_3702914	8	3702914	Yang et al. 2019
1603	chr8_3866523	s08_3866523	8	3866523	Arbelaez et al. 2019
1604	chr8_3976061	KJ08_016	8	3976061	Cheon et al. 2019
1605	chr8_3988029	KGH08_003	8	3988029	Cheon et al. 2020
1606	chr8_4097511	KJ08_017	8	4097511	Cheon et al. 2018
1607	chr8_4190544	s08_4190544	8	4190544	Arbelaez et al. 2019
1608	chr8_4511882	s08_4511882	8	4511882	Arbelaez et al. 2019
1609	chr8_4557652	SK08_4557652	8	4557652	Yang et al. 2019
1610	chr8_4732019	SK08_4732019	8	4732019	Yang et al. 2019
1611	chr8_4755855	KJ08_019	8	4755855	Cheon et al. 2018
1612	chr8_4853081	s08_4853081	8	4853081	Arbelaez et al. 2019
1613	chr8_5082883	s08_5082883	8	5082883	Arbelaez et al. 2019
1614	chr8_5136182	SK08_5136182	8	5136182	Yang et al. 2019
1615	chr8_5140824	SK08_5140824	8	5140824	Yang et al. 2019
1616	chr8_5172167	KJ08_020	8	5172167	Cheon et al. 2019
1617	chr8_5319168	KGH08_004	8	5319168	Cheon et al. 2020
1618	chr8_5371341	KJ08_021	8	5371341	Cheon et al. 2018
1619	chr8_5383178	KGH08_005	8	5383178	Cheon et al. 2020
1620	chr8_5394572	s08_5394572	8	5394572	Arbelaez et al. 2019
1621	chr8_5577588	KGH08_006	8	5577588	Cheon et al. 2020
1622	chr8_5601170	KJ08_022	8	5601170	Cheon et al. 2019
1623	chr8_5634800	s08_5634800	8	5634800	Arbelaez et al. 2019
1624	chr8_5681862	KGH08_007	8	5681862	Cheon et al. 2020
1625	chr8_5754369	SK08_5754369	8	5754369	Yang et al. 2019
1626	chr8_5786550	KJ08_023	8	5786550	Cheon et al. 2018
1627	chr8_6057127	KGH08_008	8	6057127	Cheon et al. 2020
1628	chr8_6068261	KJ08_024	8	6068261	Cheon et al. 2019
1629	chr8_6204862	KJ08_025	8	6204862	Cheon et al. 2018
1630	chr8_6269190	s08_6269190	8	6269190	Arbelaez et al. 2019
1631	chr8_6404031	KJ08_026	8	6404031	Cheon et al. 2019
1632	chr8_6765057	KJ08_028	8	6765057	Cheon et al. 2019
1633	chr8_7135930	SK08_7135930	8	7135930	Yang et al. 2019
1634	chr8_7263851	KJ08_030	8	7263851	Cheon et al. 2019
1635	chr8_7549599	s08_7549599	8	7549599	Arbelaez et al. 2019
1636	chr8_7550250	KGH08_009	8	7550250	Cheon et al. 2020
1637	chr8_7686809	KJ08_032	8	7686809	Cheon et al. 2019
1638	chr8_7694157	KGH08_010	8	7694157	Cheon et al. 2020
1639	chr8_7711263	KGH08_011	8	7711263	Cheon et al. 2020
1640	chr8_7760906	KGH08_012	8	7760906	Cheon et al. 2020
1641	chr8_7778741	KGH08_013	8	7778741	Cheon et al. 2020
1642	chr8_7854002	s08_7854002	8	7854002	Arbelaez et al. 2019
1643	chr8_8332647	KJ08_035	8	8332647	Cheon et al. 2018
1644	chr8_8386031	s08_8386031	8	8386031	Arbelaez et al. 2019
1645	chr8_8504536	KJ08_036	8	8504536	Cheon et al. 2019
1646	chr8_8580913	s08_8580913	8	8580913	Arbelaez et al. 2019
1647	chr8_8703041	s08_8703041	8	8703041	Arbelaez et al. 2019
1648	chr8_8813868	KGH08_015	8	8813868	Cheon et al. 2020
1649	chr8_8846356	KJ08_037	8	8846356	Cheon et al. 2018
1650	chr8_8897653	s08_8897653	8	8897653	Arbelaez et al. 2019
1651	chr8_9004923	KJ08_038	8	9004923	Cheon et al. 2019
1652	chr8_9203557	SK08_9203557	8	9203557	Yang et al. 2019
1653	chr8_9400516	s08_9400516	8	9400516	Arbelaez et al. 2019
1654	chr8_9488704	KJ08_040	8	9488704	Cheon et al. 2019
1655	chr8_9510603	KGH08_016	8	9510603	Cheon et al. 2020
1656	chr8_9769758	s08_9769758	8	9769758	Arbelaez et al. 2019
1657	chr8_10105233	s08_10105233	8	10105233	Arbelaez et al. 2019
1658	chr8_10188041	s08_10188041	8	10188041	Arbelaez et al. 2019
1659	chr8_10216974	KJ08_043	8	10216974	Cheon et al. 2018
1660	chr8_10273969	KJ08_044	8	10273969	Cheon et al. 2019
1661	chr8_10358484	SK08_10358484	8	10358484	Yang et al. 2019
1662	chr8_10453731	KGH08_019	8	10453731	Cheon et al. 2020
1663	chr8_10499283	KJ08_045	8	10499283	Cheon et al. 2018
1664	chr8_10926383	KGH08_020	8	10926383	Cheon et al. 2020
1665	chr8_11065511	KJ08_046	8	11065511	Cheon et al. 2019
1666	chr8_11248949	s08_11248949	8	11248949	Arbelaez et al. 2019
1667	chr8_11369197	KJ08_048	8	11369197	Cheon et al. 2019
1668	chr8_11370680	s08_11370680	8	11370680	Arbelaez et al. 2019
1669	chr8_11510855	KGH08_021	8	11510855	Cheon et al. 2020
1670	chr8_11565636	s08_11565636	8	11565636	Arbelaez et al. 2019
1671	chr8_11622925	KJ08_049	8	11622925	Cheon et al. 2018
1672	chr8_11707115	SK08_11707115	8	11707115	Yang et al. 2019
1673	chr8_11727432	s08_11727432	8	11727432	Arbelaez et al. 2019
1674	chr8_11869322	KJ08_050	8	11869322	Cheon et al. 2019
1675	chr8_11888511	s08_11888511	8	11888511	Arbelaez et al. 2019
1676	chr8_11981330	KGH08_022	8	11981330	Cheon et al. 2020
1677	chr8_12145970	s08_12145970	8	12145970	Arbelaez et al. 2019
1678	chr8_12276749	KJ08_052	8	12276749	Cheon et al. 2019
1679	chr8_12421145	s08_12421145	8	12421145	Arbelaez et al. 2019
1680	chr8_12459153	KJ08_053	8	12459153	Cheon et al. 2018
1681	chr8_12723619	s08_12723619	8	12723619	Arbelaez et al. 2019
1682	chr8_12914215	KJ08_055	8	12914215	Cheon et al. 2018
1683	chr8_12914511	KGH08_023	8	12914511	Cheon et al. 2020
1684	chr8_13017690	s08_13017690	8	13017690	Arbelaez et al. 2019
1685	chr8_13057016	SK08_13057016	8	13057016	Yang et al. 2019
1686	chr8_13354771	s08_13354771	8	13354771	Arbelaez et al. 2019
1687	chr8_13735599	KJ08_058	8	13735599	Cheon et al. 2019
1688	chr8_13741571	s08_13741571	8	13741571	Arbelaez et al. 2019
1689	chr8_13990791	KJ08_059	8	13990791	Cheon et al. 2018
1690	chr8_14054517	SK08_14054517	8	14054517	Yang et al. 2019
1691	chr8_14184612	s08_14184612	8	14184612	Arbelaez et al. 2019
1692	chr8_14184710	KJ08_060	8	14184710	Cheon et al. 2019
1693	chr8_14361448	KJ08_061	8	14361448	Cheon et al. 2018
1694	chr8_14374315	KGH08_024	8	14374315	Cheon et al. 2020
1695	chr8_14593407	KJ08_062	8	14593407	Cheon et al. 2019
1696	chr8_14676962	s08_14676962	8	14676962	Arbelaez et al. 2019
1697	chr8_14715341	KGH08_025	8	14715341	Cheon et al. 2020
1698	chr8_14799421	s08_14799421	8	14799421	Arbelaez et al. 2019
1699	chr8_14908464	SK08_14908464	8	14908464	Yang et al. 2019
1700	chr8_14986111	s08_14986111	8	14986111	Arbelaez et al. 2019
1701	chr8_14994188	KJ08_064	8	14994188	Cheon et al. 2019
1702	chr8_15195898	KJ08_065	8	15195898	Cheon et al. 2018
1703	chr8_15200594	KGH08_026	8	15200594	Cheon et al. 2020
1704	chr8_15439243	s08_15439243	8	15439243	Arbelaez et al. 2019
1705	chr8_15481942	KGH08_027	8	15481942	Cheon et al. 2020
1706	chr8_15666434	s08_15666434	8	15666434	Arbelaez et al. 2019
1707	chr8_15752022	SK08_15752022	8	15752022	Yang et al. 2019
1708	chr8_16036605	KJ08_069	8	16036605	Cheon et al. 2018
1709	chr8_16436301	KJ08_070	8	16436301	Cheon et al. 2019
1710	chr8_16451909	KJ08_071	8	16451909	Cheon et al. 2018
1711	chr8_16612067	KGH08_029	8	16612067	Cheon et al. 2020
1712	chr8_16618829	s08_16618829	8	16618829	Arbelaez et al. 2019
1713	chr8_16880843	KJ08_072	8	16880843	Cheon et al. 2019
1714	chr8_17179846	SK08_17179846	8	17179846	Yang et al. 2019
1715	chr8_17319167	s08_17319167	8	17319167	Arbelaez et al. 2019
1716	chr8_17319329	KJ08_073	8	17319329	Cheon et al. 2018
1717	chr8_17439797	KGH08_030	8	17439797	Cheon et al. 2020
1718	chr8_17540888	KGH08_031	8	17540888	Cheon et al. 2020
1719	chr8_17618902	s08_17618902	8	17618902	Arbelaez et al. 2019
1720	chr8_17642104	KJ08_074	8	17642104	Cheon et al. 2019
1721	chr8_17643955	KGH08_032	8	17643955	Cheon et al. 2020
1722	chr8_17664969	KGH08_033	8	17664969	Cheon et al. 2020
1723	chr8_17714734	KGH08_034	8	17714734	Cheon et al. 2020
1724	chr8_17721768	SK08_17721768	8	17721768	Yang et al. 2019
1725	chr8_17925692	KJ08_075	8	17925692	Cheon et al. 2018
1726	chr8_18108496	s08_18108496	8	18108496	Arbelaez et al. 2019
1727	chr8_18221884	s08_18221884	8	18221884	Arbelaez et al. 2019
1728	chr8_18494713	KJ08_077	8	18494713	Cheon et al. 2018
1729	chr8_18552226	s08_18552226	8	18552226	Arbelaez et al. 2019
1730	chr8_18585825	s08_18585825	8	18585825	Arbelaez et al. 2019
1731	chr8_18719247	s08_18719247	8	18719247	Arbelaez et al. 2019
1732	chr8_18827037	KJ08_078	8	18827037	Cheon et al. 2019
1733	chr8_19033700	KGH08_036	8	19033700	Cheon et al. 2020
1734	chr8_19136483	KJ08_079	8	19136483	Cheon et al. 2018
1735	chr8_19220614	KGH08_037	8	19220614	Cheon et al. 2020
1736	chr8_19333715	KJ08_080	8	19333715	Cheon et al. 2019
1737	chr8_19351882	s08_19351882	8	19351882	Arbelaez et al. 2019
1738	chr8_19432537	KJ08_081	8	19432537	Cheon et al. 2018
1739	chr8_19716832	KGH08_038	8	19716832	Cheon et al. 2020
1740	chr8_19799253	KJ08_083	8	19799253	Cheon et al. 2018
1741	chr8_19833397	s08_19833397	8	19833397	Arbelaez et al. 2019
1742	chr8_19905228	KGH08_040	8	19905228	Cheon et al. 2020
1743	chr8_20053642	s08_20053642	8	20053642	Arbelaez et al. 2019
1744	chr8_20253954	KJ08_085	8	20253954	Cheon et al. 2018
1745	chr8_20358826	SK08_8008549	8	20358826	Yang et al. 2019
1746	chr8_20382857	SK08_20382857	8	20382857	Yang et al. 2019
1747	chr8_20456774	KJ08_086	8	20456774	Cheon et al. 2019
1748	chr8_20637053	KJ08_087	8	20637053	Cheon et al. 2018
1749	chr8_21011651	s08_21011651	8	21011651	Arbelaez et al. 2019
1750	chr8_21039211	KJ08_088	8	21039211	Cheon et al. 2019
1751	chr8_21253397	s08_21253397	8	21253397	Arbelaez et al. 2019
1752	chr8_21463546	KJS08_001	8	21463546	Cheon et al. 2020
1753	chr8_21582840	SK08_21582840	8	21582840	Yang et al. 2019
1754	chr8_21667240	s08_21667240	8	21667240	Arbelaez et al. 2019
1755	chr8_22119651	KJS08_003	8	22119651	Cheon et al. 2020
1756	chr8_22252502	s08_22252502	8	22252502	Arbelaez et al. 2019
1757	chr8_22776414	s08_22776414	8	22776414	Arbelaez et al. 2019
1758	chr8_22845257	SK08_22845257	8	22845257	Yang et al. 2019
1759	chr8_23040011	KJS08_006	8	23040011	Cheon et al. 2020
1760	chr8_23713744	s08_23713744	8	23713744	Arbelaez et al. 2019
1761	chr8_24125399	SK08_24125399	8	24125399	Yang et al. 2019
1762	chr8_24205833	s08_24205833	8	24205833	Arbelaez et al. 2019
1763	chr8_24753844	s08_24753844	8	24753844	Arbelaez et al. 2019
1764	chr8_24903648	s08_24903648	8	24903648	Arbelaez et al. 2019
1765	chr8_25157676	s08_25157676	8	25157676	Arbelaez et al. 2019
1766	chr8_25208014	SK08_25208014	8	25208014	Yang et al. 2019
1767	chr8_25275885	SK08_25275885	8	25275885	Yang et al. 2019
1768	chr8_25320080	SK08_25320080	8	25320080	Yang et al. 2019
1769	chr8_25343868	SK08_25343868	8	25343868	Yang et al. 2019
1770	chr8_25456191	SK08_25456191	8	25456191	Yang et al. 2019
1771	chr8_25467581	s08_25467581	8	25467581	Arbelaez et al. 2019
1772	chr8_25757847	s08_25757847	8	25757847	Arbelaez et al. 2019
1773	chr8_26223300	KJ08_089	8	26223300	Cheon et al. 2018
1774	chr8_26326397	SK08_26326397	8	26326397	Yang et al. 2019
1775	chr8_26448560	xa13_01	8	26448560	Arbelaez et al. 2019
1776	chr8_26503563	SK08_26503563	8	26503563	Yang et al. 2019
1777	chr8_26709228	xa13_02	8	26709228	Arbelaez et al. 2019
1778	chr8_26728254	SK08_26728254	8	26728254	Yang et al. 2019
1779	chr8_26755059	xa13_03	8	26755059	Arbelaez et al. 2019
1780	chr8_26788194	KJ08_090	8	26788194	Cheon et al. 2019
1781	chr8_26898822	xa13_04	8	26898822	Arbelaez et al. 2019
1782	chr8_26979434	KJ08_091	8	26979434	Cheon et al. 2018
1783	chr8_27039158	s08_27039158	8	27039158	Arbelaez et al. 2019
1784	chr8_27239923	KJ08_092	8	27239923	Cheon et al. 2019
1785	chr8_27282645	s08_27282645	8	27282645	Arbelaez et al. 2019
1786	chr8_27563586	s08_27563586	8	27563586	Arbelaez et al. 2019
1787	chr8_27604168	KJ08_094	8	27604168	Cheon et al. 2019
1788	chr8_27805960	SK08_27805960	8	27805960	Yang et al. 2019
1789	chr8_27860056	KJ08_095	8	27860056	Cheon et al. 2018
1790	chr8_28125942	s08_28125942	8	28125942	Arbelaez et al. 2019
1791	chr9_148594	s09_148594	9	148594	Arbelaez et al. 2019
1792	chr9_243538	KJ09_001	9	243538	Cheon et al. 2018
1793	chr9_434420	KJ09_002	9	434420	Cheon et al. 2019
1794	chr9_496013	s09_496013	9	496013	Arbelaez et al. 2019
1795	chr9_591085	s09_591085	9	591085	Arbelaez et al. 2019
1796	chr9_929479	KJ09_004	9	929479	Cheon et al. 2019
1797	chr9_1098249	s09_1098249	9	1098249	Arbelaez et al. 2019
1798	chr9_1158812	SK09_1158812	9	1158812	Yang et al. 2019
1799	chr9_1467951	s09_1467951	9	1467951	Arbelaez et al. 2019
1800	chr9_1744797	KJ09_007	9	1744797	Cheon et al. 2018
1801	chr9_2298381	s09_2298381	9	2298381	Arbelaez et al. 2019
1802	chr9_2360445	SK09_2360445	9	2360445	Yang et al. 2019
1803	chr9_2380203	s09_2380203	9	2380203	Arbelaez et al. 2019
1804	chr9_2549780	KJ09_009	9	2549780	Cheon et al. 2018
1805	chr9_2930321	s09_2930321	9	2930321	Arbelaez et al. 2019
1806	chr9_3357568	s09_3357568	9	3357568	Arbelaez et al. 2019
1807	chr9_3603443	s09_3603443	9	3603443	Arbelaez et al. 2019
1808	chr9_3627789	KJ09_011	9	3627789	Cheon et al. 2018
1809	chr9_3717701	SK09_3717701	9	3717701	Yang et al. 2019
1810	chr9_3854200	KJ09_012	9	3854200	Cheon et al. 2019
1811	chr9_3934768	s09_3934768	9	3934768	Arbelaez et al. 2019
1812	chr9_4004403	KJ09_013	9	4004403	Cheon et al. 2018
1813	chr9_4136552	s09_4136552	9	4136552	Arbelaez et al. 2019
1814	chr9_4289783	KJ09_014	9	4289783	Cheon et al. 2019
1815	chr9_4595478	KGH09_001	9	4595478	Cheon et al. 2020
1816	chr9_4650293	s09_4650293	9	4650293	Arbelaez et al. 2019
1817	chr9_4668812	KJ09_015	9	4668812	Cheon et al. 2018
1818	chr9_4793301	SK09_4793301	9	4793301	Yang et al. 2019
1819	chr9_4962209	KJ09_016	9	4962209	Cheon et al. 2019
1820	chr9_4973082	KGH09_002	9	4973082	Cheon et al. 2020
1821	chr9_5008706	s09_5008706	9	5008706	Arbelaez et al. 2019
1822	chr9_5121916	KGH09_003	9	5121916	Cheon et al. 2020
1823	chr9_5126602	KGH09_004	9	5126602	Cheon et al. 2020
1824	chr9_5305969	s09_5305969	9	5305969	Arbelaez et al. 2019
1825	chr9_5343850	KJ09_018	9	5343850	Cheon et al. 2019
1826	chr9_5812738	s09_5812738	9	5812738	Arbelaez et al. 2019
1827	chr9_5922125	Sub1_01	9	5922125	Arbelaez et al. 2019
1828	chr9_5948910	KJ09_020	9	5948910	Cheon et al. 2019
1829	chr9_6093984	s09_6093984	9	6093984	Arbelaez et al. 2019
1830	chr9_6252407	Sub1_02	9	6252407	Arbelaez et al. 2019
1831	chr9_6360984	s09_6360984	9	6360984	Arbelaez et al. 2019
1832	chr9_6413498	KJ09_021	9	6413498	Cheon et al. 2018
1833	chr9_6657081	KJ09_022	9	6657081	Cheon et al. 2019
1834	chr9_6774928	s09_6774928	9	6774928	Arbelaez et al. 2019
1835	chr9_6796269	s09_6796269	9	6796269	Arbelaez et al. 2019
1836	chr9_6913547	Sub1_03	9	6913547	Arbelaez et al. 2019
1837	chr9_6982338	SK09_6982338	9	6982338	Yang et al. 2019
1838	chr9_7116276	s09_7116276	9	7116276	Arbelaez et al. 2019
1839	chr9_7280339	s09_7280339	9	7280339	Arbelaez et al. 2019
1840	chr9_7356016	KJ09_024	9	7356016	Cheon et al. 2019
1841	chr9_7555220	KJ09_025	9	7555220	Cheon et al. 2018
1842	chr9_8043218	s09_8043218	9	8043218	Arbelaez et al. 2019
1843	chr9_8073443	KJ09_027	9	8073443	Cheon et al. 2018
1844	chr9_8744926	KJ09_029	9	8744926	Cheon et al. 2018
1845	chr9_8851945	s09_8851945	9	8851945	Arbelaez et al. 2019
1846	chr9_8913296	KJ09_030	9	8913296	Cheon et al. 2019
1847	chr9_9087088	KJ09_031	9	9087088	Cheon et al. 2018
1848	chr9_9252104	s09_9252104	9	9252104	Arbelaez et al. 2019
1849	chr9_9431973	KGH09_006	9	9431973	Cheon et al. 2020
1850	chr9_9626056	s09_9626056	9	9626056	Arbelaez et al. 2019
1851	chr9_9674556	KJ09_033	9	9674556	Cheon et al. 2018
1852	chr9_9784212	s09_9784212	9	9784212	Arbelaez et al. 2019
1853	chr9_9837388	SK09_9837388	9	9837388	Yang et al. 2019
1854	chr9_9918781	KGH09_007	9	9918781	Cheon et al. 2020
1855	chr9_9945591	s09_9945591	9	9945591	Arbelaez et al. 2019
1856	chr9_10119114	s09_10119114	9	10119114	Arbelaez et al. 2019
1857	chr9_10123678	KJ09_035	9	10123678	Cheon et al. 2018
1858	chr9_10324014	s09_10324014	9	10324014	Arbelaez et al. 2019
1859	chr9_10741078	KGH09_009	9	10741078	Cheon et al. 2020
1860	chr9_10757351	s09_10757351	9	10757351	Arbelaez et al. 2019
1861	chr9_10788256	KJ09_036	9	10788256	Cheon et al. 2019
1862	chr9_10934233	s09_10934233	9	10934233	Arbelaez et al. 2019
1863	chr9_11237877	s09_11237877	9	11237877	Arbelaez et al. 2019
1864	chr9_11240172	KJ09_038	9	11240172	Cheon et al. 2019
1865	chr9_11439570	KJ09_039	9	11439570	Cheon et al. 2018
1866	chr9_11442404	KGH09_010	9	11442404	Cheon et al. 2020
1867	chr9_11540748	KGH09_011	9	11540748	Cheon et al. 2020
1868	chr9_11568260	KGH09_012	9	11568260	Cheon et al. 2020
1869	chr9_11653914	KJ09_040	9	11653914	Cheon et al. 2019
1870	chr9_11746684	s09_11746684	9	11746684	Arbelaez et al. 2019
1871	chr9_11776387	KJ09_041	9	11776387	Cheon et al. 2018
1872	chr9_11791221	KGH09_013	9	11791221	Cheon et al. 2020
1873	chr9_11848827	s09_11848827	9	11848827	Arbelaez et al. 2019
1874	chr9_11871485	s09_11871485	9	11871485	Arbelaez et al. 2019
1875	chr9_12029697	s09_12029697	9	12029697	Arbelaez et al. 2019
1876	chr9_12077897	KJ09_042	9	12077897	Cheon et al. 2019
1877	chr9_12211991	KJ09_043	9	12211991	Cheon et al. 2018
1878	chr9_12326525	s09_12326525	9	12326525	Arbelaez et al. 2019
1879	chr9_12358633	KGH09_014	9	12358633	Cheon et al. 2020
1880	chr9_12495597	KGH09_015	9	12495597	Cheon et al. 2020
1881	chr9_12546207	KGH09_016	9	12546207	Cheon et al. 2020
1882	chr9_12568549	KJ09_044	9	12568549	Cheon et al. 2019
1883	chr9_12575974	KGH09_017	9	12575974	Cheon et al. 2020
1884	chr9_12716578	KJ09_045	9	12716578	Cheon et al. 2018
1885	chr9_12959873	KGH09_018	9	12959873	Cheon et al. 2020
1886	chr9_13006983	KJ09_046	9	13006983	Cheon et al. 2019
1887	chr9_13589939	KJ09_049	9	13589939	Cheon et al. 2018
1888	chr9_13601851	KGH09_019	9	13601851	Cheon et al. 2020
1889	chr9_13760690	SK09_13760690	9	13760690	Yang et al. 2019
1890	chr9_13898873	KJ09_050	9	13898873	Cheon et al. 2019
1891	chr9_14184948	KJ09_051	9	14184948	Cheon et al. 2018
1892	chr9_14635830	KGH09_020	9	14635830	Cheon et al. 2020
1893	chr9_14700805	KJ09_052	9	14700805	Cheon et al. 2019
1894	chr9_14727088	SK09_14727088	9	14727088	Yang et al. 2019
1895	chr9_14796397	KJ09_053	9	14796397	Cheon et al. 2018
1896	chr9_14889045	SK09_14889045	9	14889045	Yang et al. 2019
1897	chr9_14920092	s09_14920092	9	14920092	Arbelaez et al. 2019
1898	chr9_14978933	KJ09_054	9	14978933	Cheon et al. 2019
1899	chr9_15213454	KJ09_055	9	15213454	Cheon et al. 2018
1900	chr9_15322775	s09_15322775	9	15322775	Arbelaez et al. 2019
1901	chr9_15429734	s09_15429734	9	15429734	Arbelaez et al. 2019
1902	chr9_15655654	KJ09_056	9	15655654	Cheon et al. 2019
1903	chr9_15765355	SK09_15765355	9	15765355	Yang et al. 2019
1904	chr9_15802245	KJ09_057	9	15802245	Cheon et al. 2018
1905	chr9_16277986	KJ09_059	9	16277986	Cheon et al. 2018
1906	chr9_16412063	SK09_16412063	9	16412063	Yang et al. 2019
1907	chr9_16616509	s09_16616509	9	16616509	Arbelaez et al. 2019
1908	chr9_17031996	KJ09_061	9	17031996	Cheon et al. 2018
1909	chr9_17213519	s09_17213519	9	17213519	Arbelaez et al. 2019
1910	chr9_17414249	KGH09_021	9	17414249	Cheon et al. 2020
1911	chr9_17447522	s09_17447522	9	17447522	Arbelaez et al. 2019
1912	chr9_17465569	KJ09_062	9	17465569	Cheon et al. 2019
1913	chr9_17680896	KJ09_063	9	17680896	Cheon et al. 2018
1914	chr9_17707080	s09_17707080	9	17707080	Arbelaez et al. 2019
1915	chr9_17872367	KJ09_064	9	17872367	Cheon et al. 2019
1916	chr9_18190238	KJ09_065	9	18190238	Cheon et al. 2018
1917	chr9_18306435	KJ09_066	9	18306435	Cheon et al. 2019
1918	chr9_18502078	KJ09_067	9	18502078	Cheon et al. 2018
1919	chr9_18597901	KJ09_068	9	18597901	Cheon et al. 2019
1920	chr9_18818854	KJ09_069	9	18818854	Cheon et al. 2018
1921	chr9_18868484	SK09_18868484	9	18868484	Yang et al. 2019
1922	chr9_19322095	s09_19322095	9	19322095	Arbelaez et al. 2019
1923	chr9_19337813	KJ09_071	9	19337813	Cheon et al. 2018
1924	chr9_19683788	s09_19683788	9	19683788	Arbelaez et al. 2019
1925	chr9_19709461	SK09_19709461	9	19709461	Yang et al. 2019
1926	chr9_20091056	KJ09_073	9	20091056	Cheon et al. 2018
1927	chr9_20138174	s09_20138174	9	20138174	Arbelaez et al. 2019
1928	chr9_20317688	KJ09_074	9	20317688	Cheon et al. 2019
1929	chr9_20497375	KJ09_075	9	20497375	Cheon et al. 2018
1930	chr9_20682114	s09_20682114	9	20682114	Arbelaez et al. 2019
1931	chr9_20688681	KJ09_076	9	20688681	Cheon et al. 2019
1932	chr9_21004828	KJ09_077	9	21004828	Cheon et al. 2018
1933	chr9_21127955	SK09_21127955	9	21127955	Yang et al. 2019
1934	chr9_21148430	s09_21148430	9	21148430	Arbelaez et al. 2019
1935	chr9_21196217	KJ09_078	9	21196217	Cheon et al. 2019
1936	chr9_21240672	SK09_21240672	9	21240672	Yang et al. 2019
1937	chr9_21348882	s09_21348882	9	21348882	Arbelaez et al. 2019
1938	chr9_21598192	KJ09_079	9	21598192	Cheon et al. 2018
1939	chr9_21604405	SK09_21604405	9	21604405	Yang et al. 2019
1940	chr9_21612758	s09_21612758	9	21612758	Arbelaez et al. 2019
1941	chr9_21667022	s09_21667022	9	21667022	Arbelaez et al. 2019
1942	chr9_21813051	KJ09_080	9	21813051	Cheon et al. 2019
1943	chr9_21885499	s09_21885499	9	21885499	Arbelaez et al. 2019
1944	chr9_21896910	s09_21896910	9	21896910	Arbelaez et al. 2019
1945	chr9_22076185	s09_22076185	9	22076185	Arbelaez et al. 2019
1946	chr9_22166657	KJ09_081	9	22166657	Cheon et al. 2018
1947	chr9_22173140	KJ09_082	9	22173140	Cheon et al. 2019
1948	chr9_22403093	KJ09_083	9	22403093	Cheon et al. 2018
1949	chr10_146531	s10_146531	10	146531	Arbelaez et al. 2019
1950	chr10_432398	KGH10_001	10	432398	Cheon et al. 2020
1951	chr10_493487	KJ10_001	10	493487	Cheon et al. 2018
1952	chr10_790044	s10_790044	10	790044	Arbelaez et al. 2019
1953	chr10_973578	KJ10_003	10	973578	Cheon et al. 2018
1954	chr10_1141117	KGH10_003	10	1141117	Cheon et al. 2020
1955	chr10_1562931	s10_1562931	10	1562931	Arbelaez et al. 2019
1956	chr10_1637004	KJ10_004	10	1637004	Cheon et al. 2019
1957	chr10_1796849	KJ10_005	10	1796849	Cheon et al. 2018
1958	chr10_1873548	s10_1873548	10	1873548	Arbelaez et al. 2019
1959	chr10_2064828	KJ10_006	10	2064828	Cheon et al. 2019
1960	chr10_2107854	KGH10_004	10	2107854	Cheon et al. 2020
1961	chr10_2129424	s10_2129424	10	2129424	Arbelaez et al. 2019
1962	chr10_2195402	KJ10_007	10	2195402	Cheon et al. 2018
1963	chr10_2241754	KGH10_006	10	2241754	Cheon et al. 2020
1964	chr10_2258418	s10_2258418	10	2258418	Arbelaez et al. 2019
1965	chr10_2335726	SK10_2335726	10	2335726	Yang et al. 2019
1966	chr10_2387834	KJ10_008	10	2387834	Cheon et al. 2019
1967	chr10_2438975	KGH10_007	10	2438975	Cheon et al. 2020
1968	chr10_2518001	KGH10_008	10	2518001	Cheon et al. 2020
1969	chr10_2524054	KGH10_009	10	2524054	Cheon et al. 2020
1970	chr10_2596048	KGH10_010	10	2596048	Cheon et al. 2020
1971	chr10_2760140	KJ10_009	10	2760140	Cheon et al. 2018
1972	chr10_3174353	KJ10_010	10	3174353	Cheon et al. 2019
1973	chr10_3187409	KJ10_011	10	3187409	Cheon et al. 2018
1974	chr10_3358419	s10_3358419	10	3358419	Arbelaez et al. 2019
1975	chr10_3382280	KJ10_012	10	3382280	Cheon et al. 2019
1976	chr10_3400212	s10_3400212	10	3400212	Arbelaez et al. 2019
1977	chr10_3502733	SK10_3502733	10	3502733	Yang et al. 2019
1978	chr10_3771667	KJ10_013	10	3771667	Cheon et al. 2018
1979	chr10_3833548	KJ10_014	10	3833548	Cheon et al. 2019
1980	chr10_4027971	KGH10_011	10	4027971	Cheon et al. 2020
1981	chr10_4053858	KGH10_012	10	4053858	Cheon et al. 2020
1982	chr10_4081648	KGH10_013	10	4081648	Cheon et al. 2020
1983	chr10_4281052	s10_4281052	10	4281052	Arbelaez et al. 2019
1984	chr10_4327595	KGH10_014	10	4327595	Cheon et al. 2020
1985	chr10_4664638	SK10_4664638	10	4664638	Yang et al. 2019
1986	chr10_4725869	KGH10_015	10	4725869	Cheon et al. 2020
1987	chr10_4744001	KGH10_016	10	4744001	Cheon et al. 2020
1988	chr10_4914965	KGH10_017	10	4914965	Cheon et al. 2020
1989	chr10_4950569	KGH10_018	10	4950569	Cheon et al. 2020
1990	chr10_5257224	s10_5257224	10	5257224	Arbelaez et al. 2019
1991	chr10_5488256	s10_5488256	10	5488256	Arbelaez et al. 2019
1992	chr10_5813299	KJS10_001	10	5813299	Cheon et al. 2020
1993	chr10_5826161	s10_5826161	10	5826161	Arbelaez et al. 2019
1994	chr10_6011207	KJS10_002	10	6011207	Cheon et al. 2020
1995	chr10_6099319	KJS10_003	10	6099319	Cheon et al. 2020
1996	chr10_6107128	SK10_6107128	10	6107128	Yang et al. 2019
1997	chr10_6640908	SK10_6640908	10	6640908	Yang et al. 2019
1998	chr10_6648158	s10_6648158	10	6648158	Arbelaez et al. 2019
[truncated: 567 more rows]

## Sheet: Sheet2
Table S1. List of SNP markers included in the target capture panel developed in this study.
No.	marker name (target capture panel)	marker name (original)	chromosome	position (bp)	Reference
1	chr1_858021	KGH01_001	1	858021	Cheon et al. 2020
2	chr1_2072665	KGH01_003	1	2072665	Cheon et al. 2020
3	chr1_2363715	KGH01_004	1	2363715	Cheon et al. 2020
4	chr1_2637005	KGH01_005	1	2637005	Cheon et al. 2020
5	chr1_2743020	KGH01_006	1	2743020	Cheon et al. 2020
6	chr1_18537375	KGH01_008	1	18537375	Cheon et al. 2020
7	chr1_18614158	KGH01_009	1	18614158	Cheon et al. 2020
8	chr1_18639800	KGH01_010	1	18639800	Cheon et al. 2020
9	chr1_18672361	KGH01_011	1	18672361	Cheon et al. 2020
10	chr1_23750419	KGH01_012	1	23750419	Cheon et al. 2020
11	chr1_23770117	KGH01_013	1	23770117	Cheon et al. 2020
12	chr1_23788044	KGH01_014	1	23788044	Cheon et al. 2020
13	chr1_24018937	KGH01_015	1	24018937	Cheon et al. 2020
14	chr1_24334625	KGH01_016	1	24334625	Cheon et al. 2020
15	chr1_24391090	KGH01_017	1	24391090	Cheon et al. 2020
16	chr1_24592710	KGH01_018	1	24592710	Cheon et al. 2020
17	chr1_29047992	KGH01_019	1	29047992	Cheon et al. 2020
18	chr1_32998897	KGH01_020	1	32998897	Cheon et al. 2020
19	chr1_34731512	KGH01_022	1	34731512	Cheon et al. 2020
20	chr1_34744713	KGH01_023	1	34744713	Cheon et al. 2020
21	chr1_39943861	KGH01_024	1	39943861	Cheon et al. 2020
22	chr1_41090615	KGH01_025	1	41090615	Cheon et al. 2020
23	chr2_3232811	KGH02_001	2	3232811	Cheon et al. 2020
24	chr2_10262031	KGH02_002	2	10262031	Cheon et al. 2020
25	chr2_11073926	KGH02_003	2	11073926	Cheon et al. 2020
26	chr2_14335102	KGH02_004	2	14335102	Cheon et al. 2020
27	chr2_18310026	KGH02_005	2	18310026	Cheon et al. 2020
28	chr2_24529876	KGH02_008	2	24529876	Cheon et al. 2020
29	chr2_24739001	KGH02_009	2	24739001	Cheon et al. 2020
30	chr2_32599323	KGH02_010	2	32599323	Cheon et al. 2020
31	chr2_32959229	KGH02_011	2	32959229	Cheon et al. 2020
32	chr2_34483409	KGH02_012	2	34483409	Cheon et al. 2020
33	chr2_34745395	KGH02_013	2	34745395	Cheon et al. 2020
34	chr2_34759938	KGH02_014	2	34759938	Cheon et al. 2020
35	chr2_35036091	KGH02_015	2	35036091	Cheon et al. 2020
36	chr2_35088373	KGH02_016	2	35088373	Cheon et al. 2020
37	chr2_35094096	KGH02_017	2	35094096	Cheon et al. 2020
38	chr2_35115546	KGH02_018	2	35115546	Cheon et al. 2020
39	chr2_35501042	KGH02_019	2	35501042	Cheon et al. 2020
40	chr2_35762475	KGH02_020	2	35762475	Cheon et al. 2020
41	chr2_35812152	KGH02_021	2	35812152	Cheon et al. 2020
42	chr3_4338025	KGH03_001	3	4338025	Cheon et al. 2020
43	chr3_8182713	KGH03_002	3	8182713	Cheon et al. 2020
44	chr3_8398821	KGH03_004	3	8398821	Cheon et al. 2020
45	chr3_8414645	KGH03_005	3	8414645	Cheon et al. 2020
46	chr3_8434986	KGH03_006	3	8434986	Cheon et al. 2020
47	chr3_16458072	KGH03_008	3	16458072	Cheon et al. 2020
48	chr3_16551597	KGH03_009	3	16551597	Cheon et al. 2020
49	chr3_25395900	KGH03_010	3	25395900	Cheon et al. 2020
50	chr3_31512460	KGH03_011	3	31512460	Cheon et al. 2020
51	chr4_1043226	KGH04_001	4	1043226	Cheon et al. 2020
52	chr4_1878622	KGH04_003	4	1878622	Cheon et al. 2020
53	chr4_7021579	KGH04_007	4	7021579	Cheon et al. 2020
54	chr4_7025113	KGH04_008	4	7025113	Cheon et al. 2020
55	chr4_7031851	KGH04_009	4	7031851	Cheon et al. 2020
56	chr4_17867962	KGH04_011	4	17867962	Cheon et al. 2020
57	chr4_20132588	KGH04_012	4	20132588	Cheon et al. 2020
58	chr4_21734385	KGH04_013	4	21734385	Cheon et al. 2020
59	chr4_23586775	KGH04_014	4	23586775	Cheon et al. 2020
60	chr4_24747105	KGH04_015	4	24747105	Cheon et al. 2020
61	chr4_30198373	KGH04_016	4	30198373	Cheon et al. 2020
62	chr4_30511827	KGH04_019	4	30511827	Cheon et al. 2020
63	chr4_31277196	KGH04_020	4	31277196	Cheon et al. 2020
64	chr4_31341572	KGH04_021	4	31341572	Cheon et al. 2020
65	chr4_31450795	KGH04_022	4	31450795	Cheon et al. 2020
66	chr4_31464748	KGH04_023	4	31464748	Cheon et al. 2020
67	chr4_31671271	KGH04_025	4	31671271	Cheon et al. 2020
68	chr4_32083594	KGH04_026	4	32083594	Cheon et al. 2020
69	chr4_32196610	KGH04_027	4	32196610	Cheon et al. 2020
70	chr4_32223351	KGH04_028	4	32223351	Cheon et al. 2020
71	chr4_32241178	KGH04_029	4	32241178	Cheon et al. 2020
72	chr4_32748870	KGH04_030	4	32748870	Cheon et al. 2020
73	chr4_32807202	KGH04_031	4	32807202	Cheon et al. 2020
74	chr5_17887666	KGH05_005	5	17887666	Cheon et al. 2020
75	chr6_3300607	KGH06_001	6	3300607	Cheon et al. 2020
76	chr6_3306874	KGH06_002	6	3306874	Cheon et al. 2020
77	chr6_5167941	KGH06_003	6	5167941	Cheon et al. 2020
78	chr6_8937542	KGH06_005	6	8937542	Cheon et al. 2020
79	chr6_9289417	KGH06_007	6	9289417	Cheon et al. 2020
80	chr6_9566049	KGH06_008	6	9566049	Cheon et al. 2020
81	chr6_10279890	KGH06_009	6	10279890	Cheon et al. 2020
82	chr6_10447926	KGH06_010	6	10447926	Cheon et al. 2020
83	chr6_13501409	KGH06_011	6	13501409	Cheon et al. 2020
84	chr6_13715792	KGH06_012	6	13715792	Cheon et al. 2020
85	chr6_14151281	KGH06_013	6	14151281	Cheon et al. 2020
86	chr6_14773434	KGH06_015	6	14773434	Cheon et al. 2020
87	chr6_16429856	KGH06_017	6	16429856	Cheon et al. 2020
88	chr6_16440691	KGH06_018	6	16440691	Cheon et al. 2020
89	chr6_16507688	KGH06_019	6	16507688	Cheon et al. 2020
90	chr6_17005893	KGH06_020	6	17005893	Cheon et al. 2020
91	chr6_17285715	KGH06_021	6	17285715	Cheon et al. 2020
92	chr6_18066193	KGH06_022	6	18066193	Cheon et al. 2020
93	chr6_18163084	KGH06_023	6	18163084	Cheon et al. 2020
94	chr6_19101835	KGH06_024	6	19101835	Cheon et al. 2020
95	chr6_20282850	KGH06_026	6	20282850	Cheon et al. 2020
96	chr7_183081	KGH07_001	7	183081	Cheon et al. 2020
97	chr7_3190324	KGH07_003	7	3190324	Cheon et al. 2020
98	chr7_7951167	KGH07_004	7	7951167	Cheon et al. 2020
99	chr7_13324721	KGH07_005	7	13324721	Cheon et al. 2020
100	chr7_17883910	KGH07_006	7	17883910	Cheon et al. 2020
101	chr7_19741549	KGH07_007	7	19741549	Cheon et al. 2020
102	chr7_21104616	KGH07_008	7	21104616	Cheon et al. 2020
103	chr7_21293691	KGH07_009	7	21293691	Cheon et al. 2020
104	chr7_21345932	KGH07_010	7	21345932	Cheon et al. 2020
105	chr7_21385114	KGH07_011	7	21385114	Cheon et al. 2020
106	chr7_21671752	KGH07_012	7	21671752	Cheon et al. 2020
107	chr7_24575395	KGH07_013	7	24575395	Cheon et al. 2020
108	chr7_25327472	KGH07_015	7	25327472	Cheon et al. 2020
109	chr7_25520705	KGH07_016	7	25520705	Cheon et al. 2020
110	chr7_26963593	KGH07_017	7	26963593	Cheon et al. 2020
111	chr8_269238	KGH08_001	8	269238	Cheon et al. 2020
112	chr8_1287293	KGH08_002	8	1287293	Cheon et al. 2020
113	chr8_3988029	KGH08_003	8	3988029	Cheon et al. 2020
114	chr8_5319168	KGH08_004	8	5319168	Cheon et al. 2020
115	chr8_5383178	KGH08_005	8	5383178	Cheon et al. 2020
116	chr8_5577588	KGH08_006	8	5577588	Cheon et al. 2020
117	chr8_5681862	KGH08_007	8	5681862	Cheon et al. 2020
118	chr8_6057127	KGH08_008	8	6057127	Cheon et al. 2020
119	chr8_7550250	KGH08_009	8	7550250	Cheon et al. 2020
120	chr8_7694157	KGH08_010	8	7694157	Cheon et al. 2020
121	chr8_7711263	KGH08_011	8	7711263	Cheon et al. 2020
122	chr8_7760906	KGH08_012	8	7760906	Cheon et al. 2020
123	chr8_7778741	KGH08_013	8	7778741	Cheon et al. 2020
124	chr8_8813868	KGH08_015	8	8813868	Cheon et al. 2020
125	chr8_9510603	KGH08_016	8	9510603	Cheon et al. 2020
126	chr8_10453731	KGH08_019	8	10453731	Cheon et al. 2020
127	chr8_10926383	KGH08_020	8	10926383	Cheon et al. 2020
128	chr8_11510855	KGH08_021	8	11510855	Cheon et al. 2020
129	chr8_11981330	KGH08_022	8	11981330	Cheon et al. 2020
130	chr8_12914511	KGH08_023	8	12914511	Cheon et al. 2020
131	chr8_14374315	KGH08_024	8	14374315	Cheon et al. 2020
132	chr8_14715341	KGH08_025	8	14715341	Cheon et al. 2020
133	chr8_15200594	KGH08_026	8	15200594	Cheon et al. 2020
134	chr8_15481942	KGH08_027	8	15481942	Cheon et al. 2020
135	chr8_16612067	KGH08_029	8	16612067	Cheon et al. 2020
136	chr8_17439797	KGH08_030	8	17439797	Cheon et al. 2020
137	chr8_17540888	KGH08_031	8	17540888	Cheon et al. 2020
138	chr8_17643955	KGH08_032	8	17643955	Cheon et al. 2020
139	chr8_17664969	KGH08_033	8	17664969	Cheon et al. 2020
140	chr8_17714734	KGH08_034	8	17714734	Cheon et al. 2020
141	chr8_19033700	KGH08_036	8	19033700	Cheon et al. 2020
142	chr8_19220614	KGH08_037	8	19220614	Cheon et al. 2020
143	chr8_19716832	KGH08_038	8	19716832	Cheon et al. 2020
144	chr8_19905228	KGH08_040	8	19905228	Cheon et al. 2020
145	chr9_4595478	KGH09_001	9	4595478	Cheon et al. 2020
146	chr9_4973082	KGH09_002	9	4973082	Cheon et al. 2020
147	chr9_5121916	KGH09_003	9	5121916	Cheon et al. 2020
148	chr9_5126602	KGH09_004	9	5126602	Cheon et al. 2020
149	chr9_9431973	KGH09_006	9	9431973	Cheon et al. 2020
150	chr9_9918781	KGH09_007	9	9918781	Cheon et al. 2020
151	chr9_10741078	KGH09_009	9	10741078	Cheon et al. 2020
152	chr9_11442404	KGH09_010	9	11442404	Cheon et al. 2020
153	chr9_11540748	KGH09_011	9	11540748	Cheon et al. 2020
154	chr9_11568260	KGH09_012	9	11568260	Cheon et al. 2020
155	chr9_11791221	KGH09_013	9	11791221	Cheon et al. 2020
156	chr9_12358633	KGH09_014	9	12358633	Cheon et al. 2020
157	chr9_12495597	KGH09_015	9	12495597	Cheon et al. 2020
158	chr9_12546207	KGH09_016	9	12546207	Cheon et al. 2020
159	chr9_12575974	KGH09_017	9	12575974	Cheon et al. 2020
160	chr9_12959873	KGH09_018	9	12959873	Cheon et al. 2020
161	chr9_13601851	KGH09_019	9	13601851	Cheon et al. 2020
162	chr9_14635830	KGH09_020	9	14635830	Cheon et al. 2020
163	chr9_17414249	KGH09_021	9	17414249	Cheon et al. 2020
164	chr10_432398	KGH10_001	10	432398	Cheon et al. 2020
165	chr10_1141117	KGH10_003	10	1141117	Cheon et al. 2020
166	chr10_2107854	KGH10_004	10	2107854	Cheon et al. 2020
167	chr10_2241754	KGH10_006	10	2241754	Cheon et al. 2020
168	chr10_2438975	KGH10_007	10	2438975	Cheon et al. 2020
169	chr10_2518001	KGH10_008	10	2518001	Cheon et al. 2020
170	chr10_2524054	KGH10_009	10	2524054	Cheon et al. 2020
171	chr10_2596048	KGH10_010	10	2596048	Cheon et al. 2020
172	chr10_4027971	KGH10_011	10	4027971	Cheon et al. 2020
173	chr10_4053858	KGH10_012	10	4053858	Cheon et al. 2020
174	chr10_4081648	KGH10_013	10	4081648	Cheon et al. 2020
175	chr10_4327595	KGH10_014	10	4327595	Cheon et al. 2020
176	chr10_4725869	KGH10_015	10	4725869	Cheon et al. 2020
177	chr10_4744001	KGH10_016	10	4744001	Cheon et al. 2020
178	chr10_4914965	KGH10_017	10	4914965	Cheon et al. 2020
179	chr10_4950569	KGH10_018	10	4950569	Cheon et al. 2020
180	chr10_6716328	KGH10_020	10	6716328	Cheon et al. 2020
181	chr10_7436052	KGH10_023	10	7436052	Cheon et al. 2020
182	chr10_9089540	KGH10_024	10	9089540	Cheon et al. 2020
183	chr10_9389161	KGH10_025	10	9389161	Cheon et al. 2020
184	chr10_9541536	KGH10_026	10	9541536	Cheon et al. 2020
185	chr10_17065456	KGH10_027	10	17065456	Cheon et al. 2020
186	chr10_17348388	KGH10_028	10	17348388	Cheon et al. 2020
187	chr10_21256365	KGH10_030	10	21256365	Cheon et al. 2020
188	chr10_22608401	KGH10_031	10	22608401	Cheon et al. 2020
189	chr11_2972385	KGH11_003	11	2972385	Cheon et al. 2020
190	chr11_3631498	KGH11_005	11	3631498	Cheon et al. 2020
191	chr11_4264190	KGH11_008	11	4264190	Cheon et al. 2020
192	chr11_4757668	KGH11_010	11	4757668	Cheon et al. 2020
193	chr11_5087782	KGH11_011	11	5087782	Cheon et al. 2020
194	chr11_5091251	KGH11_012	11	5091251	Cheon et al. 2020
195	chr11_5514857	KGH11_013	11	5514857	Cheon et al. 2020
196	chr11_5533095	KGH11_014	11	5533095	Cheon et al. 2020
197	chr11_5593226	KGH11_015	11	5593226	Cheon et al. 2020
198	chr11_5610243	KGH11_016	11	5610243	Cheon et al. 2020
199	chr11_5634011	KGH11_017	11	5634011	Cheon et al. 2020
200	chr11_5917206	KGH11_018	11	5917206	Cheon et al. 2020
201	chr11_6634324	KGH11_019	11	6634324	Cheon et al. 2020
202	chr11_7228370	KGH11_021	11	7228370	Cheon et al. 2020
203	chr11_10185437	KGH11_022	11	10185437	Cheon et al. 2020
204	chr11_10253132	KGH11_023	11	10253132	Cheon et al. 2020
205	chr11_10582260	KGH11_024	11	10582260	Cheon et al. 2020
206	chr11_10868271	KGH11_025	11	10868271	Cheon et al. 2020
207	chr11_11586629	KGH11_028	11	11586629	Cheon et al. 2020
208	chr11_11655042	KGH11_029	11	11655042	Cheon et al. 2020
209	chr11_12078602	KGH11_030	11	12078602	Cheon et al. 2020
210	chr11_13443576	KGH11_031	11	13443576	Cheon et al. 2020
211	chr11_14098131	KGH11_032	11	14098131	Cheon et al. 2020
212	chr11_14203355	KGH11_033	11	14203355	Cheon et al. 2020
213	chr11_15339988	KGH11_034	11	15339988	Cheon et al. 2020
214	chr11_17100122	KGH11_035	11	17100122	Cheon et al. 2020
215	chr11_18070384	KGH11_036	11	18070384	Cheon et al. 2020
216	chr11_18376215	KGH11_037	11	18376215	Cheon et al. 2020
217	chr11_18445711	KGH11_038	11	18445711	Cheon et al. 2020
218	chr11_18904361	KGH11_039	11	18904361	Cheon et al. 2020
219	chr11_19056233	KGH11_040	11	19056233	Cheon et al. 2020
220	chr11_19211841	KGH11_041	11	19211841	Cheon et al. 2020
221	chr11_19451975	KGH11_042	11	19451975	Cheon et al. 2020
222	chr11_19695582	KGH11_044	11	19695582	Cheon et al. 2020
223	chr11_19803133	KGH11_046	11	19803133	Cheon et al. 2020
224	chr11_20144928	KGH11_049	11	20144928	Cheon et al. 2020
225	chr11_20388085	KGH11_050	11	20388085	Cheon et al. 2020
226	chr11_20464509	KGH11_052	11	20464509	Cheon et al. 2020
227	chr11_20572652	KGH11_053	11	20572652	Cheon et al. 2020
228	chr11_21047520	KGH11_056	11	21047520	Cheon et al. 2020
229	chr11_21254126	KGH11_057	11	21254126	Cheon et al. 2020
230	chr11_21286982	KGH11_058	11	21286982	Cheon et al. 2020
231	chr11_21299432	KGH11_059	11	21299432	Cheon et al. 2020
232	chr11_21531950	KGH11_060	11	21531950	Cheon et al. 2020
233	chr11_21732190	KGH11_062	11	21732190	Cheon et al. 2020
234	chr11_21790322	KGH11_063	11	21790322	Cheon et al. 2020
235	chr11_21818061	KGH11_064	11	21818061	Cheon et al. 2020
236	chr11_21841863	KGH11_065	11	21841863	Cheon et al. 2020
237	chr11_21851168	KGH11_066	11	21851168	Cheon et al. 2020
238	chr11_22026410	KGH11_067	11	22026410	Cheon et al. 2020
239	chr11_22434043	KGH11_069	11	22434043	Cheon et al. 2020
240	chr11_22506057	KGH11_070	11	22506057	Cheon et al. 2020
241	chr11_22534482	KGH11_071	11	22534482	Cheon et al. 2020
242	chr11_22640936	KGH11_073	11	22640936	Cheon et al. 2020
243	chr11_23122912	KGH11_075	11	23122912	Cheon et al. 2020
244	chr11_23405245	KGH11_076	11	23405245	Cheon et al. 2020
245	chr11_23556556	KGH11_077	11	23556556	Cheon et al. 2020
246	chr11_23853670	KGH11_078	11	23853670	Cheon et al. 2020
247	chr11_24388188	KGH11_080	11	24388188	Cheon et al. 2020
248	chr11_26917403	KGH11_082	11	26917403	Cheon et al. 2020
249	chr11_27177126	KGH11_083	11	27177126	Cheon et al. 2020
250	chr11_27285004	KGH11_085	11	27285004	Cheon et al. 2020
251	chr11_27381040	KGH11_087	11	27381040	Cheon et al. 2020
252	chr11_27565680	KGH11_089	11	27565680	Cheon et al. 2020
253	chr11_27789512	KGH11_090	11	27789512	Cheon et al. 2020
254	chr11_27796938	KGH11_091	11	27796938	Cheon et al. 2020
255	chr11_27888930	KGH11_092	11	27888930	Cheon et al. 2020
256	chr11_28226234	KGH11_093	11	28226234	Cheon et al. 2020
257	chr11_28256156	KGH11_094	11	28256156	Cheon et al. 2020
258	chr11_28653979	KGH11_097	11	28653979	Cheon et al. 2020
259	chr11_28728619	KGH11_098	11	28728619	Cheon et al. 2020
260	chr11_28813415	KGH11_100	11	28813415	Cheon et al. 2020
261	chr12_4097562	KGH12_003	12	4097562	Cheon et al. 2020
262	chr12_4213201	KGH12_004	12	4213201	Cheon et al. 2020
263	chr12_4213739	KGH12_005	12	4213739	Cheon et al. 2020
264	chr12_4399597	KGH12_006	12	4399597	Cheon et al. 2020
265	chr12_5470453	KGH12_007	12	5470453	Cheon et al. 2020
266	chr12_5740881	KGH12_008	12	5740881	Cheon et al. 2020
267	chr12_6139263	KGH12_009	12	6139263	Cheon et al. 2020
268	chr12_6895629	KGH12_010	12	6895629	Cheon et al. 2020
269	chr12_7101501	KGH12_011	12	7101501	Cheon et al. 2020
270	chr12_7932244	KGH12_012	12	7932244	Cheon et al. 2020
271	chr12_8164981	KGH12_013	12	8164981	Cheon et al. 2020
272	chr12_8822047	KGH12_015	12	8822047	Cheon et al. 2020
273	chr12_9538201	KGH12_016	12	9538201	Cheon et al. 2020
274	chr12_10059389	KGH12_017	12	10059389	Cheon et al. 2020
275	chr12_14111662	KGH12_019	12	14111662	Cheon et al. 2020
276	chr12_14977279	KGH12_020	12	14977279	Cheon et al. 2020
277	chr12_18371874	KGH12_021	12	18371874	Cheon et al. 2020
278	chr12_19381814	KGH12_023	12	19381814	Cheon et al. 2020
279	chr12_20086566	KGH12_024	12	20086566	Cheon et al. 2020
280	chr12_20750154	KGH12_025	12	20750154	Cheon et al. 2020
281	chr12_20868573	KGH12_026	12	20868573	Cheon et al. 2020
282	chr12_27024272	KGH12_027	12	27024272	Cheon et al. 2020
283	chr12_27062146	KGH12_028	12	27062146	Cheon et al. 2020
284	chr1_728809	KJ01_001	1	728809	Cheon et al. 2018
285	chr1_1360285	KJ01_002	1	1360285	Cheon et al. 2019
286	chr1_2103204	KJ01_005	1	2103204	Cheon et al. 2018
287	chr1_2416981	KJ01_007	1	2416981	Cheon et al. 2018
288	chr1_2871043	KJ01_009	1	2871043	Cheon et al. 2018
289	chr1_3257654	KJ01_011	1	3257654	Cheon et al. 2018
290	chr1_3523649	KJ01_013	1	3523649	Cheon et al. 2018
291	chr1_4209102	KJ01_015	1	4209102	Cheon et al. 2018
292	chr1_5104605	KJ01_017	1	5104605	Cheon et al. 2018
293	chr1_5282345	KJ01_018	1	5282345	Cheon et al. 2019
294	chr1_5545903	KJ01_019	1	5545903	Cheon et al. 2018
295	chr1_6090970	KJ01_020	1	6090970	Cheon et al. 2019
296	chr1_6962310	KJ01_021	1	6962310	Cheon et al. 2018
297	chr1_7005390	KJ01_022	1	7005390	Cheon et al. 2019
298	chr1_7847128	KJ01_023	1	7847128	Cheon et al. 2018
299	chr1_8221027	KJ01_024	1	8221027	Cheon et al. 2019
300	chr1_8509783	KJ01_025	1	8509783	Cheon et al. 2018
301	chr1_8709969	KJ01_026	1	8709969	Cheon et al. 2019
302	chr1_8959187	KJ01_027	1	8959187	Cheon et al. 2018
303	chr1_9392804	KJ01_029	1	9392804	Cheon et al. 2018
304	chr1_9727509	KJ01_030	1	9727509	Cheon et al. 2019
305	chr1_9880602	KJ01_031	1	9880602	Cheon et al. 2018
306	chr1_10219743	KJ01_033	1	10219743	Cheon et al. 2018
307	chr1_10508312	KJ01_034	1	10508312	Cheon et al. 2019
308	chr1_10747508	KJ01_035	1	10747508	Cheon et al. 2018
309	chr1_10949580	KJ01_036	1	10949580	Cheon et al. 2019
310	chr1_11209993	KJ01_037	1	11209993	Cheon et al. 2018
311	chr1_11422519	KJ01_038	1	11422519	Cheon et al. 2019
312	chr1_11817615	KJ01_039	1	11817615	Cheon et al. 2018
313	chr1_11845635	KJ01_040	1	11845635	Cheon et al. 2019
314	chr1_12085916	KJ01_041	1	12085916	Cheon et al. 2018
315	chr1_12947332	KJ01_043	1	12947332	Cheon et al. 2018
316	chr1_13208844	KJ01_044	1	13208844	Cheon et al. 2019
317	chr1_13519853	KJ01_045	1	13519853	Cheon et al. 2018
318	chr1_13954900	KJ01_046	1	13954900	Cheon et al. 2019
319	chr1_15013659	KJ01_049	1	15013659	Cheon et al. 2018
320	chr1_15132528	KJ01_050	1	15132528	Cheon et al. 2019
321	chr1_15337994	KJ01_051	1	15337994	Cheon et al. 2018
322	chr1_16677609	KJ01_055	1	16677609	Cheon et al. 2018
323	chr1_17081395	KJ01_056	1	17081395	Cheon et al. 2019
324	chr1_17387570	KJ01_057	1	17387570	Cheon et al. 2018
325	chr1_17540508	KJ01_058	1	17540508	Cheon et al. 2019
326	chr1_17904770	KJ01_059	1	17904770	Cheon et al. 2018
327	chr1_18801488	KJ01_061	1	18801488	Cheon et al. 2018
328	chr1_18999843	KJ01_062	1	18999843	Cheon et al. 2019
329	chr1_19095472	KJ01_063	1	19095472	Cheon et al. 2018
330	chr1_19985793	KJ01_065	1	19985793	Cheon et al. 2018
331	chr1_20278128	KJ01_066	1	20278128	Cheon et al. 2019
332	chr1_20488201	KJ01_067	1	20488201	Cheon et al. 2018
333	chr1_21109231	KJ01_069	1	21109231	Cheon et al. 2018
334	chr1_21361944	KJ01_071	1	21361944	Cheon et al. 2018
335	chr1_22048209	KJ01_073	1	22048209	Cheon et al. 2018
336	chr1_23239662	KJ01_074	1	23239662	Cheon et al. 2019
337	chr1_23434283	KJ01_075	1	23434283	Cheon et al. 2018
338	chr1_23672875	KJ01_076	1	23672875	Cheon et al. 2019
339	chr1_23912768	KJ01_077	1	23912768	Cheon et al. 2018
340	chr1_24366725	KJ01_079	1	24366725	Cheon et al. 2018
341	chr1_24741254	KJ01_080	1	24741254	Cheon et al. 2019
342	chr1_24958106	KJ01_081	1	24958106	Cheon et al. 2018
343	chr1_27055210	KJ01_082	1	27055210	Cheon et al. 2019
344	chr1_27486960	KJ01_083	1	27486960	Cheon et al. 2018
345	chr1_28117617	KJ01_084	1	28117617	Cheon et al. 2019
346	chr1_30215191	KJ01_087	1	30215191	Cheon et al. 2018
347	chr1_30307657	KJ01_088	1	30307657	Cheon et al. 2019
348	chr1_31859289	KJ01_089	1	31859289	Cheon et al. 2018
349	chr1_31896769	KJ01_090	1	31896769	Cheon et al. 2019
350	chr1_32130527	KJ01_091	1	32130527	Cheon et al. 2018
351	chr1_32356312	KJ01_092	1	32356312	Cheon et al. 2019
352	chr1_32551664	KJ01_093	1	32551664	Cheon et al. 2018
353	chr1_32734306	KJ01_094	1	32734306	Cheon et al. 2019
354	chr1_33176515	KJ01_096	1	33176515	Cheon et al. 2019
355	chr1_33340511	KJ01_097	1	33340511	Cheon et al. 2018
356	chr1_33557575	KJ01_098	1	33557575	Cheon et al. 2019
357	chr1_33887084	KJ01_099	1	33887084	Cheon et al. 2018
358	chr1_34102017	KJ01_100	1	34102017	Cheon et al. 2019
359	chr1_34310167	KJ01_101	1	34310167	Cheon et al. 2018
360	chr1_34728965	KJ01_102	1	34728965	Cheon et al. 2019
361	chr1_34919159	KJ01_103	1	34919159	Cheon et al. 2018
362	chr1_35190113	KJ01_105	1	35190113	Cheon et al. 2018
363	chr1_35909958	KJ01_107	1	35909958	Cheon et al. 2018
364	chr1_36501158	KJ01_109	1	36501158	Cheon et al. 2018
365	chr1_36649551	KJ01_110	1	36649551	Cheon et al. 2019
366	chr1_37052448	KJ01_111	1	37052448	Cheon et al. 2018
367	chr1_38079312	KJ01_112	1	38079312	Cheon et al. 2019
368	chr1_38104765	KJ01_113	1	38104765	Cheon et al. 2018
369	chr1_39622533	KJ01_115	1	39622533	Cheon et al. 2018
370	chr1_39810719	KJ01_116	1	39810719	Cheon et al. 2019
371	chr1_40089944	KJ01_117	1	40089944	Cheon et al. 2018
372	chr1_40437865	KJ01_119	1	40437865	Cheon et al. 2018
373	chr1_40733249	KJ01_120	1	40733249	Cheon et al. 2019
374	chr1_41138835	KJ01_121	1	41138835	Cheon et al. 2018
375	chr1_41371769	KJ01_122	1	41371769	Cheon et al. 2019
376	chr1_41546787	KJ01_123	1	41546787	Cheon et al. 2018
377	chr1_41628856	KJ01_124	1	41628856	Cheon et al. 2019
378	chr1_41979600	KJ01_125	1	41979600	Cheon et al. 2018
379	chr1_42234111	KJ01_126	1	42234111	Cheon et al. 2019
380	chr1_42482913	KJ01_127	1	42482913	Cheon et al. 2018
381	chr1_42661152	KJ01_128	1	42661152	Cheon et al. 2019
382	chr1_42946801	KJ01_129	1	42946801	Cheon et al. 2018
383	chr1_43140530	KJ01_130	1	43140530	Cheon et al. 2019
384	chr2_3548115	KJ02_001	2	3548115	Cheon et al. 2018
385	chr2_3622167	KJ02_002	2	3622167	Cheon et al. 2019
386	chr2_4372712	KJ02_003	2	4372712	Cheon et al. 2018
387	chr2_4419382	KJ02_004	2	4419382	Cheon et al. 2019
388	chr2_4656692	KJ02_005	2	4656692	Cheon et al. 2018
389	chr2_4927125	KJ02_006	2	4927125	Cheon et al. 2019
390	chr2_5120420	KJ02_007	2	5120420	Cheon et al. 2018
391	chr2_5329403	KJ02_008	2	5329403	Cheon et al. 2019
392	chr2_5523756	KJ02_009	2	5523756	Cheon et al. 2018
393	chr2_5670594	KJ02_010	2	5670594	Cheon et al. 2019
394	chr2_5819810	KJ02_011	2	5819810	Cheon et al. 2018
395	chr2_6500738	KJ02_012	2	6500738	Cheon et al. 2019
396	chr2_7801801	KJ02_013	2	7801801	Cheon et al. 2018
397	chr2_7828021	KJ02_014	2	7828021	Cheon et al. 2019
398	chr2_9106318	KJ02_016	2	9106318	Cheon et al. 2019
399	chr2_9449360	KJ02_018	2	9449360	Cheon et al. 2019
400	chr2_9780295	KJ02_019	2	9780295	Cheon et al. 2018
401	chr2_9978736	KJ02_020	2	9978736	Cheon et al. 2019
402	chr2_10801112	KJ02_023	2	10801112	Cheon et al. 2018
403	chr2_11097886	KJ02_024	2	11097886	Cheon et al. 2019
404	chr2_11211324	KJ02_025	2	11211324	Cheon et al. 2018
405	chr2_11381586	KJ02_026	2	11381586	Cheon et al. 2019
406	chr2_19483986	KJ02_027	2	19483986	Cheon et al. 2018
407	chr2_19672436	KJ02_028	2	19672436	Cheon et al. 2019
408	chr2_19888551	KJ02_029	2	19888551	Cheon et al. 2018
409	chr2_20079102	KJ02_030	2	20079102	Cheon et al. 2019
410	chr2_20335697	KJ02_031	2	20335697	Cheon et al. 2018
411	chr2_21123989	KJ02_032	2	21123989	Cheon et al. 2019
412	chr2_21592733	KJ02_033	2	21592733	Cheon et al. 2018
413	chr2_21779087	KJ02_034	2	21779087	Cheon et al. 2019
414	chr2_21983655	KJ02_035	2	21983655	Cheon et al. 2018
415	chr2_22218724	KJ02_036	2	22218724	Cheon et al. 2019
416	chr2_22584996	KJ02_038	2	22584996	Cheon et al. 2019
417	chr2_22684234	KJ02_039	2	22684234	Cheon et al. 2018
418	chr2_23078724	KJ02_040	2	23078724	Cheon et al. 2019
419	chr2_23182326	KJ02_041	2	23182326	Cheon et al. 2018
420	chr2_23739361	KJ02_042	2	23739361	Cheon et al. 2019
421	chr2_23850625	KJ02_043	2	23850625	Cheon et al. 2018
422	chr2_24062285	KJ02_044	2	24062285	Cheon et al. 2019
423	chr2_24278925	KJ02_045	2	24278925	Cheon et al. 2018
424	chr2_24478726	KJ02_046	2	24478726	Cheon et al. 2019
425	chr2_24582137	KJ02_047	2	24582137	Cheon et al. 2018
426	chr2_24884978	KJ02_048	2	24884978	Cheon et al. 2019
427	chr2_25019879	KJ02_049	2	25019879	Cheon et al. 2018
428	chr2_25162443	KJ02_050	2	25162443	Cheon et al. 2019
429	chr2_25510192	KJ02_051	2	25510192	Cheon et al. 2018
430	chr2_26003809	KJ02_052	2	26003809	Cheon et al. 2019
431	chr2_26176180	KJ02_053	2	26176180	Cheon et al. 2018
432	chr2_26252449	KJ02_054	2	26252449	Cheon et al. 2019
433	chr2_26684782	KJ02_056	2	26684782	Cheon et al. 2019
434	chr2_26691450	KJ02_057	2	26691450	Cheon et al. 2018
435	chr2_27049326	KJ02_058	2	27049326	Cheon et al. 2019
436	chr2_28173954	KJ02_061	2	28173954	Cheon et al. 2018
437	chr2_29187837	KJ02_062	2	29187837	Cheon et al. 2019
438	chr2_29736272	KJ02_064	2	29736272	Cheon et al. 2019
439	chr2_29958026	KJ02_065	2	29958026	Cheon et al. 2018
440	chr2_31546386	KJ02_068	2	31546386	Cheon et al. 2019
441	chr2_32118114	KJ02_071	2	32118114	Cheon et al. 2018
442	chr2_33142844	KJ02_073	2	33142844	Cheon et al. 2018
443	chr2_33208146	KJ02_074	2	33208146	Cheon et al. 2019
444	chr2_33465007	KJ02_075	2	33465007	Cheon et al. 2018
445	chr2_33973330	KJ02_077	2	33973330	Cheon et al. 2018
446	chr2_34635870	KJ02_079	2	34635870	Cheon et al. 2018
447	chr2_35187201	KJ02_081	2	35187201	Cheon et al. 2018
448	chr2_35587883	KJ02_083	2	35587883	Cheon et al. 2018
449	chr2_35788038	KJ02_084	2	35788038	Cheon et al. 2019
450	chr3_204361	KJ03_001	3	204361	Cheon et al. 2018
451	chr3_517088	KJ03_003	3	517088	Cheon et al. 2018
452	chr3_962390	KJ03_004	3	962390	Cheon et al. 2019
453	chr3_1164119	KJ03_005	3	1164119	Cheon et al. 2018
454	chr3_1545991	KJ03_006	3	1545991	Cheon et al. 2019
455	chr3_1729434	KJ03_007	3	1729434	Cheon et al. 2018
456	chr3_1923995	KJ03_008	3	1923995	Cheon et al. 2019
457	chr3_2745334	KJ03_010	3	2745334	Cheon et al. 2019
458	chr3_4213581	KJ03_013	3	4213581	Cheon et al. 2018
459	chr3_4427241	KJ03_015	3	4427241	Cheon et al. 2018
460	chr3_4788297	KJ03_016	3	4788297	Cheon et al. 2019
461	chr3_5676626	KJ03_017	3	5676626	Cheon et al. 2018
462	chr3_5824894	KJ03_018	3	5824894	Cheon et al. 2019
463	chr3_6251476	KJ03_019	3	6251476	Cheon et al. 2018
464	chr3_6418648	KJ03_020	3	6418648	Cheon et al. 2019
465	chr3_6633863	KJ03_021	3	6633863	Cheon et al. 2018
466	chr3_6830072	KJ03_022	3	6830072	Cheon et al. 2019
467	chr3_10819217	KJ03_023	3	10819217	Cheon et al. 2018
468	chr3_11697508	KJ03_026	3	11697508	Cheon et al. 2019
469	chr3_12345604	KJ03_029	3	12345604	Cheon et al. 2018
470	chr3_12785160	KJ03_031	3	12785160	Cheon et al. 2018
471	chr3_13045075	KJ03_032	3	13045075	Cheon et al. 2019
472	chr3_13122748	KJ03_033	3	13122748	Cheon et al. 2018
473	chr3_15485201	KJ03_034	3	15485201	Cheon et al. 2019
474	chr3_16877782	KJ03_035	3	16877782	Cheon et al. 2018
475	chr3_17273847	KJ03_036	3	17273847	Cheon et al. 2019
476	chr3_17439699	KJ03_037	3	17439699	Cheon et al. 2018
477	chr3_17786669	KJ03_038	3	17786669	Cheon et al. 2019
478	chr3_18107418	KJ03_039	3	18107418	Cheon et al. 2018
479	chr3_19143571	KJ03_043	3	19143571	Cheon et al. 2018
480	chr3_19428982	KJ03_044	3	19428982	Cheon et al. 2019
481	chr3_19960058	KJ03_046	3	19960058	Cheon et al. 2019
482	chr3_20053624	KJ03_047	3	20053624	Cheon et al. 2018
483	chr3_20363332	KJ03_048	3	20363332	Cheon et al. 2019
484	chr3_20832905	KJ03_050	3	20832905	Cheon et al. 2019
485	chr3_21465191	KJ03_053	3	21465191	Cheon et al. 2018
486	chr3_21728184	KJ03_054	3	21728184	Cheon et al. 2019
487	chr3_22407127	KJ03_057	3	22407127	Cheon et al. 2018
488	chr3_22586460	KJ03_058	3	22586460	Cheon et al. 2019
489	chr3_24294753	KJ03_060	3	24294753	Cheon et al. 2019
490	chr3_24699522	KJ03_062	3	24699522	Cheon et al. 2019
491	chr3_25288125	KJ03_063	3	25288125	Cheon et al. 2018
492	chr3_25317391	KJ03_064	3	25317391	Cheon et al. 2019
493	chr3_25983847	KJ03_065	3	25983847	Cheon et al. 2018
494	chr3_26858590	KJ03_066	3	26858590	Cheon et al. 2019
495	chr3_28167520	KJ03_067	3	28167520	Cheon et al. 2018
496	chr3_28530956	KJ03_068	3	28530956	Cheon et al. 2019
497	chr3_32355773	KJ03_069	3	32355773	Cheon et al. 2018
498	chr4_8167	KJ04_001	4	8167	Cheon et al. 2018
499	chr4_864053	KJ04_004	4	864053	Cheon et al. 2019
500	chr4_998087	KJ04_006	4	998087	Cheon et al. 2019
501	chr4_1336178	KJ04_007	4	1336178	Cheon et al. 2018
502	chr4_1444825	KJ04_008	4	1444825	Cheon et al. 2019
503	chr4_1843334	KJ04_009	4	1843334	Cheon et al. 2018
504	chr4_2044263	KJ04_010	4	2044263	Cheon et al. 2019
505	chr4_2245964	KJ04_011	4	2245964	Cheon et al. 2018
506	chr4_2445754	KJ04_012	4	2445754	Cheon et al. 2019
507	chr4_2992621	KJ04_015	4	2992621	Cheon et al. 2018
508	chr4_3843536	KJ04_018	4	3843536	Cheon et al. 2019
509	chr4_4035257	KJ04_019	4	4035257	Cheon et al. 2018
510	chr4_4284661	KJ04_020	4	4284661	Cheon et al. 2019
511	chr4_4526234	KJ04_021	4	4526234	Cheon et al. 2018
512	chr4_4723318	KJ04_022	4	4723318	Cheon et al. 2019
513	chr4_4945262	KJ04_023	4	4945262	Cheon et al. 2018
514	chr4_5377293	KJ04_025	4	5377293	Cheon et al. 2018
515	chr4_5789508	KJ04_027	4	5789508	Cheon et al. 2018
516	chr4_6384872	KJ04_029	4	6384872	Cheon et al. 2018
517	chr4_6434512	KJ04_030	4	6434512	Cheon et al. 2019
518	chr4_7432489	KJ04_032	4	7432489	Cheon et al. 2019
519	chr4_7680596	KJ04_033	4	7680596	Cheon et al. 2018
520	chr4_8299964	KJ04_036	4	8299964	Cheon et al. 2019
521	chr4_9051840	KJ04_039	4	9051840	Cheon et al. 2018
522	chr4_9411427	KJ04_040	4	9411427	Cheon et al. 2019
523	chr4_9929207	KJ04_041	4	9929207	Cheon et al. 2018
524	chr4_10212164	KJ04_042	4	10212164	Cheon et al. 2019
525	chr4_10695483	KJ04_043	4	10695483	Cheon et al. 2018
526	chr4_11598520	KJ04_046	4	11598520	Cheon et al. 2019
527	chr4_11832332	KJ04_047	4	11832332	Cheon et al. 2018
528	chr4_12116458	KJ04_048	4	12116458	Cheon et al. 2019
529	chr4_17250626	KJ04_053	4	17250626	Cheon et al. 2018
530	chr4_18114091	KJ04_057	4	18114091	Cheon et al. 2018
531	chr4_19541114	KJ04_059	4	19541114	Cheon et al. 2018
532	chr4_19622432	KJ04_060	4	19622432	Cheon et al. 2019
533	chr4_20495719	KJ04_062	4	20495719	Cheon et al. 2019
534	chr4_21825277	KJ04_067	4	21825277	Cheon et al. 2018
535	chr4_22022073	KJ04_068	4	22022073	Cheon et al. 2019
536	chr4_22171220	KJ04_069	4	22171220	Cheon et al. 2018
537	chr4_23886835	KJ04_072	4	23886835	Cheon et al. 2019
538	chr4_24250223	KJ04_073	4	24250223	Cheon et al. 2018
539	chr4_24388444	KJ04_074	4	24388444	Cheon et al. 2019
540	chr4_24593462	KJ04_075	4	24593462	Cheon et al. 2018
541	chr4_24757162	KJ04_076	4	24757162	Cheon et al. 2019
542	chr4_24780440	KJ04_077	4	24780440	Cheon et al. 2018
543	chr4_25837976	KJ04_078	4	25837976	Cheon et al. 2019
544	chr4_27107735	KJ04_080	4	27107735	Cheon et al. 2019
545	chr4_27179949	KJ04_081	4	27179949	Cheon et al. 2018
546	chr4_27670273	KJ04_083	4	27670273	Cheon et al. 2018
547	chr4_27755621	KJ04_084	4	27755621	Cheon et al. 2019
548	chr4_29136343	KJ04_085	4	29136343	Cheon et al. 2018
549	chr4_31409353	KJ04_086	4	31409353	Cheon et al. 2019
550	chr4_31581963	KJ04_087	4	31581963	Cheon et al. 2018
551	chr4_32259816	KJ04_088	4	32259816	Cheon et al. 2019
552	chr4_32660337	KJ04_089	4	32660337	Cheon et al. 2018
553	chr4_33606106	KJ04_090	4	33606106	Cheon et al. 2019
554	chr4_34209963	KJ04_091	4	34209963	Cheon et al. 2018
555	chr4_34382077	KJ04_092	4	34382077	Cheon et al. 2019
556	chr4_34535832	KJ04_093	4	34535832	Cheon et al. 2018
557	chr4_35078228	KJ04_095	4	35078228	Cheon et al. 2018
558	chr5_7130	KJ05_001	5	7130	Cheon et al. 2018
559	chr5_207008	KJ05_002	5	207008	Cheon et al. 2019
560	chr5_591451	KJ05_003	5	591451	Cheon et al. 2018
561	chr5_641051	KJ05_004	5	641051	Cheon et al. 2019
562	chr5_1243736	KJ05_005	5	1243736	Cheon et al. 2018
563	chr5_1766082	KJ05_007	5	1766082	Cheon et al. 2018
564	chr5_2007954	KJ05_008	5	2007954	Cheon et al. 2019
565	chr5_2360311	KJ05_009	5	2360311	Cheon et al. 2018
566	chr5_2394819	KJ05_010	5	2394819	Cheon et al. 2019
567	chr5_2831817	KJ05_011	5	2831817	Cheon et al. 2018
568	chr5_3044947	KJ05_012	5	3044947	Cheon et al. 2019
569	chr5_4783888	KJ05_013	5	4783888	Cheon et al. 2018
570	chr5_5354416	KJ05_014	5	5354416	Cheon et al. 2019
571	chr5_5360210	KJ05_015	5	5360210	Cheon et al. 2018
572	chr5_5472427	KJ05_016	5	5472427	Cheon et al. 2019
573	chr5_5984919	KJ05_017	5	5984919	Cheon et al. 2018
574	chr5_6109831	KJ05_018	5	6109831	Cheon et al. 2019
575	chr5_6562635	KJ05_019	5	6562635	Cheon et al. 2018
576	chr5_6674203	KJ05_020	5	6674203	Cheon et al. 2019
577	chr5_7040154	KJ05_021	5	7040154	Cheon et al. 2018
578	chr5_7194845	KJ05_022	5	7194845	Cheon et al. 2019
579	chr5_7392294	KJ05_023	5	7392294	Cheon et al. 2018
580	chr5_7756614	KJ05_025	5	7756614	Cheon et al. 2018
581	chr5_8021900	KJ05_026	5	8021900	Cheon et al. 2019
582	chr5_11098186	KJ05_028	5	11098186	Cheon et al. 2019
583	chr5_12691869	KJ05_029	5	12691869	Cheon et al. 2018
584	chr5_15317821	KJ05_030	5	15317821	Cheon et al. 2019
585	chr5_16326736	KJ05_032	5	16326736	Cheon et al. 2019
586	chr5_17252517	KJ05_033	5	17252517	Cheon et al. 2018
587	chr5_17371944	KJ05_034	5	17371944	Cheon et al. 2019
588	chr5_17637398	KJ05_035	5	17637398	Cheon et al. 2018
589	chr5_17834629	KJ05_036	5	17834629	Cheon et al. 2019
590	chr5_18031950	KJ05_037	5	18031950	Cheon et al. 2018
591	chr5_18443082	KJ05_038	5	18443082	Cheon et al. 2019
592	chr5_18623022	KJ05_039	5	18623022	Cheon et al. 2018
593	chr5_18905370	KJ05_040	5	18905370	Cheon et al. 2019
594	chr5_18986036	KJ05_041	5	18986036	Cheon et al. 2018
595	chr5_19480980	KJ05_042	5	19480980	Cheon et al. 2019
596	chr5_19521378	KJ05_043	5	19521378	Cheon et al. 2018
597	chr5_19893809	KJ05_044	5	19893809	Cheon et al. 2019
598	chr5_20774465	KJ05_046	5	20774465	Cheon et al. 2019
599	chr5_20785235	KJ05_047	5	20785235	Cheon et al. 2018
600	chr5_21766289	KJ05_050	5	21766289	Cheon et al. 2019
601	chr5_22081477	KJ05_051	5	22081477	Cheon et al. 2018
602	chr5_22805256	KJ05_053	5	22805256	Cheon et al. 2018
603	chr5_23216295	KJ05_054	5	23216295	Cheon et al. 2019
604	chr5_23727191	KJ05_055	5	23727191	Cheon et al. 2018
605	chr5_24020057	KJ05_056	5	24020057	Cheon et al. 2019
606	chr5_24196872	KJ05_057	5	24196872	Cheon et al. 2018
607	chr5_24231845	KJ05_058	5	24231845	Cheon et al. 2019
608	chr5_24773184	KJ05_059	5	24773184	Cheon et al. 2018
609	chr5_24999987	KJ05_060	5	24999987	Cheon et al. 2019
610	chr5_25246244	KJ05_061	5	25246244	Cheon et al. 2018
611	chr5_25852536	KJ05_063	5	25852536	Cheon et al. 2018
612	chr5_25956535	KJ05_064	5	25956535	Cheon et al. 2019
613	chr5_26029645	KJ05_065	5	26029645	Cheon et al. 2018
614	chr5_26390859	KJ05_066	5	26390859	Cheon et al. 2019
615	chr5_26813227	KJ05_067	5	26813227	Cheon et al. 2018
616	chr5_27795820	KJ05_071	5	27795820	Cheon et al. 2018
617	chr5_27944747	KJ05_072	5	27944747	Cheon et al. 2019
618	chr5_28383107	KJ05_074	5	28383107	Cheon et al. 2019
619	chr5_28560614	KJ05_075	5	28560614	Cheon et al. 2018
620	chr5_28718002	KJ05_076	5	28718002	Cheon et al. 2019
621	chr6_637769	KJ06_004	6	637769	Cheon et al. 2019
622	chr6_1038324	KJ06_005	6	1038324	Cheon et al. 2018
623	chr6_1114863	KJ06_006	6	1114863	Cheon et al. 2019
624	chr6_1266434	KJ06_007	6	1266434	Cheon et al. 2018
625	chr6_2751641	KJ06_008	6	2751641	Cheon et al. 2019
626	chr6_2936067	KJ06_009	6	2936067	Cheon et al. 2018
627	chr6_3277562	KJ06_010	6	3277562	Cheon et al. 2019
628	chr6_3365147	KJ06_011	6	3365147	Cheon et al. 2018
629	chr6_3571407	KJ06_012	6	3571407	Cheon et al. 2019
630	chr6_3754113	KJ06_013	6	3754113	Cheon et al. 2018
631	chr6_3977139	KJ06_014	6	3977139	Cheon et al. 2019
632	chr6_4708665	KJ06_015	6	4708665	Cheon et al. 2018
633	chr6_5299280	KJ06_016	6	5299280	Cheon et al. 2019
634	chr6_5495783	KJ06_017	6	5495783	Cheon et al. 2018
635	chr6_5731693	KJ06_018	6	5731693	Cheon et al. 2019
636	chr6_5911796	KJ06_019	6	5911796	Cheon et al. 2018
637	chr6_6635225	KJ06_022	6	6635225	Cheon et al. 2019
638	chr6_6770568	KJ06_023	6	6770568	Cheon et al. 2018
639	chr6_7229106	KJ06_025	6	7229106	Cheon et al. 2018
640	chr6_7435718	KJ06_026	6	7435718	Cheon et al. 2019
641	chr6_7708089	KJ06_027	6	7708089	Cheon et al. 2018
642	chr6_7822950	KJ06_028	6	7822950	Cheon et al. 2019
643	chr6_7837648	KJ06_029	6	7837648	Cheon et al. 2018
644	chr6_8334407	KJ06_030	6	8334407	Cheon et al. 2019
645	chr6_8481127	KJ06_031	6	8481127	Cheon et al. 2018
646	chr6_9035697	KJ06_033	6	9035697	Cheon et al. 2018
647	chr6_9138291	KJ06_034	6	9138291	Cheon et al. 2019
648	chr6_9271476	KJ06_035	6	9271476	Cheon et al. 2018
649	chr6_9529669	KJ06_036	6	9529669	Cheon et al. 2019
650	chr6_10319632	KJ06_038	6	10319632	Cheon et al. 2019
651	chr6_10437834	KJ06_039	6	10437834	Cheon et al. 2018
652	chr6_10780360	KJ06_040	6	10780360	Cheon et al. 2019
653	chr6_11914008	KJ06_041	6	11914008	Cheon et al. 2018
654	chr6_12927975	KJ06_044	6	12927975	Cheon et al. 2019
655	chr6_12988857	KJ06_045	6	12988857	Cheon et al. 2018
656	chr6_13351589	KJ06_047	6	13351589	Cheon et al. 2018
657	chr6_13814825	KJ06_049	6	13814825	Cheon et al. 2018
658	chr6_15196594	KJ06_055	6	15196594	Cheon et al. 2018
659	chr6_15408817	KJ06_056	6	15408817	Cheon et al. 2019
660	chr6_16220700	KJ06_059	6	16220700	Cheon et al. 2018
661	chr6_16609478	KJ06_061	6	16609478	Cheon et al. 2018
662	chr6_16865337	KJ06_062	6	16865337	Cheon et al. 2019
663	chr6_17875066	KJ06_064	6	17875066	Cheon et al. 2019
664	chr6_18746527	KJ06_066	6	18746527	Cheon et al. 2019
665	chr6_19182748	KJ06_067	6	19182748	Cheon et al. 2018
666	chr6_19783820	KJ06_068	6	19783820	Cheon et al. 2019
667	chr6_21690712	KJ06_070	6	21690712	Cheon et al. 2019
668	chr6_21799623	KJ06_071	6	21799623	Cheon et al. 2018
669	chr6_22115798	KJ06_072	6	22115798	Cheon et al. 2019
670	chr6_22306256	KJ06_073	6	22306256	Cheon et al. 2018
671	chr6_22536653	KJ06_074	6	22536653	Cheon et al. 2019
672	chr6_22769496	KJ06_075	6	22769496	Cheon et al. 2018
673	chr6_23836891	KJ06_077	6	23836891	Cheon et al. 2018
674	chr6_23960981	KJ06_078	6	23960981	Cheon et al. 2019
675	chr6_24997051	KJ06_079	6	24997051	Cheon et al. 2018
676	chr6_25433672	KJ06_080	6	25433672	Cheon et al. 2019
677	chr6_25793346	KJ06_081	6	25793346	Cheon et al. 2018
678	chr6_29179807	KJ06_082	6	29179807	Cheon et al. 2019
679	chr6_29960908	KJ06_083	6	29960908	Cheon et al. 2018
680	chr6_30402598	KJ06_084	6	30402598	Cheon et al. 2019
681	chr7_3980	KJ07_001	7	3980	Cheon et al. 2018
682	chr7_216333	KJ07_002	7	216333	Cheon et al. 2019
683	chr7_289217	KJ07_003	7	289217	Cheon et al. 2018
684	chr7_866524	KJ07_004	7	866524	Cheon et al. 2019
685	chr7_928984	KJ07_005	7	928984	Cheon et al. 2018
686	chr7_1113524	KJ07_006	7	1113524	Cheon et al. 2019
687	chr7_1317768	KJ07_007	7	1317768	Cheon et al. 2018
688	chr7_1611002	KJ07_008	7	1611002	Cheon et al. 2019
689	chr7_2025847	KJ07_010	7	2025847	Cheon et al. 2019
690	chr7_2277644	KJ07_011	7	2277644	Cheon et al. 2018
691	chr7_2682973	KJ07_012	7	2682973	Cheon et al. 2019
692	chr7_2749068	KJ07_013	7	2749068	Cheon et al. 2018
693	chr7_3108600	KJ07_014	7	3108600	Cheon et al. 2019
694	chr7_3300456	KJ07_015	7	3300456	Cheon et al. 2018
695	chr7_3510553	KJ07_016	7	3510553	Cheon et al. 2019
696	chr7_3705757	KJ07_017	7	3705757	Cheon et al. 2018
697	chr7_3789086	KJ07_018	7	3789086	Cheon et al. 2019
698	chr7_4239741	KJ07_019	7	4239741	Cheon et al. 2018
699	chr7_4448493	KJ07_020	7	4448493	Cheon et al. 2019
700	chr7_4644793	KJ07_021	7	4644793	Cheon et al. 2018
701	chr7_4770598	KJ07_022	7	4770598	Cheon et al. 2019
702	chr7_6720823	KJ07_023	7	6720823	Cheon et al. 2018
703	chr7_7036726	KJ07_024	7	7036726	Cheon et al. 2019
704	chr7_7431843	KJ07_026	7	7431843	Cheon et al. 2019
705	chr7_8918567	KJ07_028	7	8918567	Cheon et al. 2019
706	chr7_9147667	KJ07_029	7	9147667	Cheon et al. 2018
707	chr7_9324798	KJ07_030	7	9324798	Cheon et al. 2019
708	chr7_11030430	KJ07_033	7	11030430	Cheon et al. 2018
709	chr7_11052704	KJ07_034	7	11052704	Cheon et al. 2019
710	chr7_14432880	KJ07_037	7	14432880	Cheon et al. 2018
711	chr7_14739487	KJ07_038	7	14739487	Cheon et al. 2019
712	chr7_15311521	KJ07_039	7	15311521	Cheon et al. 2018
713	chr7_15512750	KJ07_040	7	15512750	Cheon et al. 2019
714	chr7_15712796	KJ07_041	7	15712796	Cheon et al. 2018
715	chr7_15912596	KJ07_042	7	15912596	Cheon et al. 2019
716	chr7_16023116	KJ07_043	7	16023116	Cheon et al. 2018
717	chr7_16118477	KJ07_044	7	16118477	Cheon et al. 2019
718	chr7_16761823	KJ07_045	7	16761823	Cheon et al. 2018
719	chr7_16961376	KJ07_046	7	16961376	Cheon et al. 2019
720	chr7_17277936	KJ07_047	7	17277936	Cheon et al. 2018
721	chr7_17553044	KJ07_048	7	17553044	Cheon et al. 2019
722	chr7_17762865	KJ07_049	7	17762865	Cheon et al. 2018
723	chr7_17957356	KJ07_050	7	17957356	Cheon et al. 2019
724	chr7_18168615	KJ07_051	7	18168615	Cheon et al. 2018
725	chr7_18700679	KJ07_053	7	18700679	Cheon et al. 2018
726	chr7_18895470	KJ07_054	7	18895470	Cheon et al. 2019
727	chr7_19696332	KJ07_057	7	19696332	Cheon et al. 2018
728	chr7_19929771	KJ07_058	7	19929771	Cheon et al. 2019
729	chr7_20124410	KJ07_059	7	20124410	Cheon et al. 2018
730	chr7_20648508	KJ07_060	7	20648508	Cheon et al. 2019
731	chr7_20728990	KJ07_061	7	20728990	Cheon et al. 2018
732	chr7_21096419	KJ07_062	7	21096419	Cheon et al. 2019
733	chr7_21367800	KJ07_063	7	21367800	Cheon et al. 2018
734	chr7_22196332	KJ07_066	7	22196332	Cheon et al. 2019
735	chr7_22377948	KJ07_067	7	22377948	Cheon et al. 2018
736	chr7_22724630	KJ07_068	7	22724630	Cheon et al. 2019
737	chr7_23471376	KJ07_069	7	23471376	Cheon et al. 2018
738	chr7_23967813	KJ07_070	7	23967813	Cheon et al. 2019
739	chr7_24146716	KJ07_071	7	24146716	Cheon et al. 2018
740	chr7_24674898	KJ07_073	7	24674898	Cheon et al. 2018
741	chr7_24775370	KJ07_074	7	24775370	Cheon et al. 2019
742	chr7_24968707	KJ07_075	7	24968707	Cheon et al. 2018
743	chr7_25132131	KJ07_076	7	25132131	Cheon et al. 2019
744	chr7_25647896	KJ07_078	7	25647896	Cheon et al. 2019
745	chr7_27960534	KJ07_080	7	27960534	Cheon et al. 2019
746	chr7_28091875	KJ07_081	7	28091875	Cheon et al. 2018
747	chr7_28377055	KJ07_082	7	28377055	Cheon et al. 2019
748	chr7_29318430	KJ07_084	7	29318430	Cheon et al. 2019
749	chr7_29529536	KJ07_085	7	29529536	Cheon et al. 2018
750	chr8_1044621	KJ08_002	8	1044621	Cheon et al. 2019
751	chr8_1282290	KJ08_003	8	1282290	Cheon et al. 2018
752	chr8_1670756	KJ08_004	8	1670756	Cheon et al. 2019
753	chr8_2107949	KJ08_007	8	2107949	Cheon et al. 2018
754	chr8_2479524	KJ08_008	8	2479524	Cheon et al. 2019
755	chr8_2523368	KJ08_009	8	2523368	Cheon et al. 2018
756	chr8_2940939	KJ08_011	8	2940939	Cheon et al. 2018
757	chr8_3275444	KJ08_012	8	3275444	Cheon et al. 2019
758	chr8_3339157	KJ08_013	8	3339157	Cheon et al. 2018
759	chr8_3528585	KJ08_014	8	3528585	Cheon et al. 2019
760	chr8_3700395	KJ08_015	8	3700395	Cheon et al. 2018
761	chr8_3976061	KJ08_016	8	3976061	Cheon et al. 2019
762	chr8_4097511	KJ08_017	8	4097511	Cheon et al. 2018
763	chr8_4755855	KJ08_019	8	4755855	Cheon et al. 2018
764	chr8_5172167	KJ08_020	8	5172167	Cheon et al. 2019
765	chr8_5371341	KJ08_021	8	5371341	Cheon et al. 2018
766	chr8_5601170	KJ08_022	8	5601170	Cheon et al. 2019
767	chr8_5786550	KJ08_023	8	5786550	Cheon et al. 2018
768	chr8_6068261	KJ08_024	8	6068261	Cheon et al. 2019
769	chr8_6204862	KJ08_025	8	6204862	Cheon et al. 2018
770	chr8_6404031	KJ08_026	8	6404031	Cheon et al. 2019
771	chr8_6765057	KJ08_028	8	6765057	Cheon et al. 2019
772	chr8_7263851	KJ08_030	8	7263851	Cheon et al. 2019
773	chr8_7686809	KJ08_032	8	7686809	Cheon et al. 2019
774	chr8_8332647	KJ08_035	8	8332647	Cheon et al. 2018
775	chr8_8504536	KJ08_036	8	8504536	Cheon et al. 2019
776	chr8_8846356	KJ08_037	8	8846356	Cheon et al. 2018
777	chr8_9004923	KJ08_038	8	9004923	Cheon et al. 2019
778	chr8_9488704	KJ08_040	8	9488704	Cheon et al. 2019
779	chr8_10216974	KJ08_043	8	10216974	Cheon et al. 2018
780	chr8_10273969	KJ08_044	8	10273969	Cheon et al. 2019
781	chr8_10499283	KJ08_045	8	10499283	Cheon et al. 2018
782	chr8_11065511	KJ08_046	8	11065511	Cheon et al. 2019
783	chr8_11369197	KJ08_048	8	11369197	Cheon et al. 2019
784	chr8_11622925	KJ08_049	8	11622925	Cheon et al. 2018
785	chr8_11869322	KJ08_050	8	11869322	Cheon et al. 2019
786	chr8_12276749	KJ08_052	8	12276749	Cheon et al. 2019
787	chr8_12459153	KJ08_053	8	12459153	Cheon et al. 2018
788	chr8_12914215	KJ08_055	8	12914215	Cheon et al. 2018
789	chr8_13735599	KJ08_058	8	13735599	Cheon et al. 2019
790	chr8_13990791	KJ08_059	8	13990791	Cheon et al. 2018
791	chr8_14184710	KJ08_060	8	14184710	Cheon et al. 2019
792	chr8_14361448	KJ08_061	8	14361448	Cheon et al. 2018
793	chr8_14593407	KJ08_062	8	14593407	Cheon et al. 2019
794	chr8_14994188	KJ08_064	8	14994188	Cheon et al. 2019
795	chr8_15195898	KJ08_065	8	15195898	Cheon et al. 2018
796	chr8_16036605	KJ08_069	8	16036605	Cheon et al. 2018
797	chr8_16436301	KJ08_070	8	16436301	Cheon et al. 2019
798	chr8_16451909	KJ08_071	8	16451909	Cheon et al. 2018
799	chr8_16880843	KJ08_072	8	16880843	Cheon et al. 2019
800	chr8_17319329	KJ08_073	8	17319329	Cheon et al. 2018
801	chr8_17642104	KJ08_074	8	17642104	Cheon et al. 2019
802	chr8_17925692	KJ08_075	8	17925692	Cheon et al. 2018
803	chr8_18494713	KJ08_077	8	18494713	Cheon et al. 2018
804	chr8_18827037	KJ08_078	8	18827037	Cheon et al. 2019
805	chr8_19136483	KJ08_079	8	19136483	Cheon et al. 2018
806	chr8_19333715	KJ08_080	8	19333715	Cheon et al. 2019
807	chr8_19432537	KJ08_081	8	19432537	Cheon et al. 2018
808	chr8_19799253	KJ08_083	8	19799253	Cheon et al. 2018
809	chr8_20253954	KJ08_085	8	20253954	Cheon et al. 2018
810	chr8_20456774	KJ08_086	8	20456774	Cheon et al. 2019
811	chr8_20637053	KJ08_087	8	20637053	Cheon et al. 2018
812	chr8_21039211	KJ08_088	8	21039211	Cheon et al. 2019
813	chr8_26223300	KJ08_089	8	26223300	Cheon et al. 2018
814	chr8_26788194	KJ08_090	8	26788194	Cheon et al. 2019
815	chr8_26979434	KJ08_091	8	26979434	Cheon et al. 2018
816	chr8_27239923	KJ08_092	8	27239923	Cheon et al. 2019
817	chr8_27407698	KJ08_093	8	27407698	Cheon et al. 2018
818	chr8_27604168	KJ08_094	8	27604168	Cheon et al. 2019
819	chr8_27860056	KJ08_095	8	27860056	Cheon et al. 2018
820	chr9_243538	KJ09_001	9	243538	Cheon et al. 2018
821	chr9_434420	KJ09_002	9	434420	Cheon et al. 2019
822	chr9_929479	KJ09_004	9	929479	Cheon et al. 2019
823	chr9_1744797	KJ09_007	9	1744797	Cheon et al. 2018
824	chr9_2549780	KJ09_009	9	2549780	Cheon et al. 2018
825	chr9_3627789	KJ09_011	9	3627789	Cheon et al. 2018
826	chr9_3854200	KJ09_012	9	3854200	Cheon et al. 2019
827	chr9_4004403	KJ09_013	9	4004403	Cheon et al. 2018
828	chr9_4289783	KJ09_014	9	4289783	Cheon et al. 2019
829	chr9_4668812	KJ09_015	9	4668812	Cheon et al. 2018
830	chr9_4962209	KJ09_016	9	4962209	Cheon et al. 2019
831	chr9_5343850	KJ09_018	9	5343850	Cheon et al. 2019
832	chr9_5948910	KJ09_020	9	5948910	Cheon et al. 2019
833	chr9_6413498	KJ09_021	9	6413498	Cheon et al. 2018
834	chr9_6657081	KJ09_022	9	6657081	Cheon et al. 2019
835	chr9_7356016	KJ09_024	9	7356016	Cheon et al. 2019
836	chr9_7555220	KJ09_025	9	7555220	Cheon et al. 2018
837	chr9_8073443	KJ09_027	9	8073443	Cheon et al. 2018
838	chr9_8744926	KJ09_029	9	8744926	Cheon et al. 2018
839	chr9_8913296	KJ09_030	9	8913296	Cheon et al. 2019
840	chr9_9087088	KJ09_031	9	9087088	Cheon et al. 2018
841	chr9_9674556	KJ09_033	9	9674556	Cheon et al. 2018
842	chr9_10123678	KJ09_035	9	10123678	Cheon et al. 2018
843	chr9_10788256	KJ09_036	9	10788256	Cheon et al. 2019
844	chr9_11240172	KJ09_038	9	11240172	Cheon et al. 2019
845	chr9_11439570	KJ09_039	9	11439570	Cheon et al. 2018
846	chr9_11653914	KJ09_040	9	11653914	Cheon et al. 2019
847	chr9_11776387	KJ09_041	9	11776387	Cheon et al. 2018
848	chr9_12077897	KJ09_042	9	12077897	Cheon et al. 2019
849	chr9_12211991	KJ09_043	9	12211991	Cheon et al. 2018
850	chr9_12568549	KJ09_044	9	12568549	Cheon et al. 2019
851	chr9_12716578	KJ09_045	9	12716578	Cheon et al. 2018
852	chr9_13006983	KJ09_046	9	13006983	Cheon et al. 2019
853	chr9_13589939	KJ09_049	9	13589939	Cheon et al. 2018
854	chr9_13898873	KJ09_050	9	13898873	Cheon et al. 2019
855	chr9_14184948	KJ09_051	9	14184948	Cheon et al. 2018
856	chr9_14700805	KJ09_052	9	14700805	Cheon et al. 2019
857	chr9_14796397	KJ09_053	9	14796397	Cheon et al. 2018
858	chr9_14978933	KJ09_054	9	14978933	Cheon et al. 2019
859	chr9_15213454	KJ09_055	9	15213454	Cheon et al. 2018
860	chr9_15655654	KJ09_056	9	15655654	Cheon et al. 2019
861	chr9_15802245	KJ09_057	9	15802245	Cheon et al. 2018
862	chr9_16277986	KJ09_059	9	16277986	Cheon et al. 2018
863	chr9_17031996	KJ09_061	9	17031996	Cheon et al. 2018
864	chr9_17465569	KJ09_062	9	17465569	Cheon et al. 2019
865	chr9_17680896	KJ09_063	9	17680896	Cheon et al. 2018
866	chr9_17872367	KJ09_064	9	17872367	Cheon et al. 2019
867	chr9_18190238	KJ09_065	9	18190238	Cheon et al. 2018
868	chr9_18306435	KJ09_066	9	18306435	Cheon et al. 2019
869	chr9_18502078	KJ09_067	9	18502078	Cheon et al. 2018
870	chr9_18597901	KJ09_068	9	18597901	Cheon et al. 2019
871	chr9_18818854	KJ09_069	9	18818854	Cheon et al. 2018
872	chr9_19337813	KJ09_071	9	19337813	Cheon et al. 2018
873	chr9_20091056	KJ09_073	9	20091056	Cheon et al. 2018
874	chr9_20317688	KJ09_074	9	20317688	Cheon et al. 2019
875	chr9_20497375	KJ09_075	9	20497375	Cheon et al. 2018
876	chr9_20688681	KJ09_076	9	20688681	Cheon et al. 2019
877	chr9_21004828	KJ09_077	9	21004828	Cheon et al. 2018
878	chr9_21196217	KJ09_078	9	21196217	Cheon et al. 2019
879	chr9_21598192	KJ09_079	9	21598192	Cheon et al. 2018
880	chr9_21813051	KJ09_080	9	21813051	Cheon et al. 2019
881	chr9_22166657	KJ09_081	9	22166657	Cheon et al. 2018
882	chr9_22173140	KJ09_082	9	22173140	Cheon et al. 2019
883	chr9_22403093	KJ09_083	9	22403093	Cheon et al. 2018
884	chr10_493487	KJ10_001	10	493487	Cheon et al. 2018
885	chr10_973578	KJ10_003	10	973578	Cheon et al. 2018
886	chr10_1637004	KJ10_004	10	1637004	Cheon et al. 2019
887	chr10_1796849	KJ10_005	10	1796849	Cheon et al. 2018
888	chr10_2064828	KJ10_006	10	2064828	Cheon et al. 2019
889	chr10_2195402	KJ10_007	10	2195402	Cheon et al. 2018
890	chr10_2387834	KJ10_008	10	2387834	Cheon et al. 2019
891	chr10_2760140	KJ10_009	10	2760140	Cheon et al. 2018
892	chr10_3174353	KJ10_010	10	3174353	Cheon et al. 2019
893	chr10_3187409	KJ10_011	10	3187409	Cheon et al. 2018
894	chr10_3382280	KJ10_012	10	3382280	Cheon et al. 2019
895	chr10_3771667	KJ10_013	10	3771667	Cheon et al. 2018
896	chr10_3833548	KJ10_014	10	3833548	Cheon et al. 2019
897	chr10_9513814	KJ10_015	10	9513814	Cheon et al. 2018
898	chr10_14166643	KJ10_017	10	14166643	Cheon et al. 2018
899	chr10_14629323	KJ10_018	10	14629323	Cheon et al. 2019
900	chr10_15128495	KJ10_019	10	15128495	Cheon et al. 2018
901	chr10_15821749	KJ10_021	10	15821749	Cheon et al. 2018
902	chr10_16001680	KJ10_022	10	16001680	Cheon et al. 2019
903	chr10_16202743	KJ10_023	10	16202743	Cheon et al. 2018
904	chr10_16700924	KJ10_024	10	16700924	Cheon et al. 2019
905	chr10_17050840	KJ10_025	10	17050840	Cheon et al. 2018
906	chr10_17232520	KJ10_026	10	17232520	Cheon et al. 2019
907	chr10_17508129	KJ10_027	10	17508129	Cheon et al. 2018
908	chr10_17782820	KJ10_028	10	17782820	Cheon et al. 2019
909	chr10_17855985	KJ10_029	10	17855985	Cheon et al. 2018
910	chr10_18059286	KJ10_030	10	18059286	Cheon et al. 2019
911	chr10_18196228	KJ10_031	10	18196228	Cheon et al. 2018
912	chr10_18355033	KJ10_032	10	18355033	Cheon et al. 2019
913	chr10_18461290	KJ10_033	10	18461290	Cheon et al. 2018
914	chr10_19212489	KJ10_034	10	19212489	Cheon et al. 2019
915	chr10_19473918	KJ10_035	10	19473918	Cheon et al. 2018
916	chr10_19635346	KJ10_036	10	19635346	Cheon et al. 2019
917	chr10_20358666	KJ10_039	10	20358666	Cheon et al. 2018
918	chr10_20894522	KJ10_040	10	20894522	Cheon et al. 2019
919	chr10_21047555	KJ10_041	10	21047555	Cheon et al. 2018
920	chr10_21090119	KJ10_042	10	21090119	Cheon et al. 2019
921	chr10_21389928	KJ10_043	10	21389928	Cheon et al. 2018
922	chr10_21823138	KJ10_045	10	21823138	Cheon et al. 2018
923	chr10_21931430	KJ10_046	10	21931430	Cheon et al. 2019
924	chr10_22128982	KJ10_047	10	22128982	Cheon et al. 2018
925	chr10_22389675	KJ10_048	10	22389675	Cheon et al. 2019
926	chr10_22459939	KJ10_049	10	22459939	Cheon et al. 2018
927	chr10_22758731	KJ10_050	10	22758731	Cheon et al. 2019
928	chr11_273657	KJ11_001	11	273657	Cheon et al. 2018
929	chr11_624865	KJ11_002	11	624865	Cheon et al. 2019
930	chr11_741739	KJ11_003	11	741739	Cheon et al. 2018
931	chr11_1080991	KJ11_004	11	1080991	Cheon et al. 2019
932	chr11_2455283	KJ11_005	11	2455283	Cheon et al. 2018
933	chr11_2831357	KJ11_007	11	2831357	Cheon et al. 2018
934	chr11_3780339	KJ11_008	11	3780339	Cheon et al. 2019
935	chr11_4141123	KJ11_010	11	4141123	Cheon et al. 2019
936	chr11_4803442	KJ11_012	11	4803442	Cheon et al. 2019
937	chr11_5007156	KJ11_013	11	5007156	Cheon et al. 2018
938	chr11_5560424	KJ11_015	11	5560424	Cheon et al. 2018
939	chr11_5675607	KJ11_016	11	5675607	Cheon et al. 2019
940	chr11_5928004	KJ11_017	11	5928004	Cheon et al. 2018
941	chr11_6377155	KJ11_019	11	6377155	Cheon et al. 2018
942	chr11_6603547	KJ11_020	11	6603547	Cheon et al. 2019
943	chr11_7069824	KJ11_022	11	7069824	Cheon et al. 2019
944	chr11_7461078	KJ11_024	11	7461078	Cheon et al. 2019
945	chr11_7667318	KJ11_025	11	7667318	Cheon et al. 2018
946	chr11_7888490	KJ11_026	11	7888490	Cheon et al. 2019
947	chr11_8225301	KJ11_028	11	8225301	Cheon et al. 2019
948	chr11_9486873	KJ11_030	11	9486873	Cheon et al. 2019
949	chr11_9734345	KJ11_031	11	9734345	Cheon et al. 2018
950	chr11_9809482	KJ11_032	11	9809482	Cheon et al. 2019
951	chr11_10335474	KJ11_033	11	10335474	Cheon et al. 2018
952	chr11_10468333	KJ11_034	11	10468333	Cheon et al. 2019
953	chr11_10738094	KJ11_035	11	10738094	Cheon et al. 2018
954	chr11_11138532	KJ11_037	11	11138532	Cheon et al. 2018
955	chr11_11945191	KJ11_041	11	11945191	Cheon et al. 2018
956	chr11_12066584	KJ11_042	11	12066584	Cheon et al. 2019
957	chr11_12295393	KJ11_043	11	12295393	Cheon et al. 2018
958	chr11_12747515	KJ11_044	11	12747515	Cheon et al. 2019
959	chr11_13176854	KJ11_046	11	13176854	Cheon et al. 2019
960	chr11_13368816	KJ11_047	11	13368816	Cheon et al. 2018
961	chr11_13793186	KJ11_049	11	13793186	Cheon et al. 2018
962	chr11_14070665	KJ11_050	11	14070665	Cheon et al. 2019
963	chr11_14468323	KJ11_052	11	14468323	Cheon et al. 2019
964	chr11_14924704	KJ11_054	11	14924704	Cheon et al. 2019
965	chr11_15133279	KJ11_055	11	15133279	Cheon et al. 2018
966	chr11_15350659	KJ11_056	11	15350659	Cheon et al. 2019
967	chr11_15591509	KJ11_057	11	15591509	Cheon et al. 2018
968	chr11_15638184	KJ11_058	11	15638184	Cheon et al. 2019
969	chr11_15869882	KJ11_059	11	15869882	Cheon et al. 2018
970	chr11_16457906	KJ11_060	11	16457906	Cheon et al. 2019
971	chr11_17062104	KJ11_061	11	17062104	Cheon et al. 2018
972	chr11_17089696	KJ11_062	11	17089696	Cheon et al. 2019
973	chr11_17506323	KJ11_063	11	17506323	Cheon et al. 2018
974	chr11_17886991	KJ11_064	11	17886991	Cheon et al. 2019
975	chr11_18287255	KJ11_066	11	18287255	Cheon et al. 2019
976	chr11_18487411	KJ11_067	11	18487411	Cheon et al. 2018
977	chr11_18687760	KJ11_068	11	18687760	Cheon et al. 2019
978	chr11_18887525	KJ11_069	11	18887525	Cheon et al. 2018
979	chr11_19088213	KJ11_070	11	19088213	Cheon et al. 2019
980	chr11_19328968	KJ11_071	11	19328968	Cheon et al. 2018
981	chr11_19593598	KJ11_072	11	19593598	Cheon et al. 2019
982	chr11_20119905	KJ11_075	11	20119905	Cheon et al. 2018
983	chr11_20528145	KJ11_077	11	20528145	Cheon et al. 2018
984	chr11_21124032	KJ11_080	11	21124032	Cheon et al. 2019
985	chr11_22091425	KJ11_084	11	22091425	Cheon et al. 2019
986	chr11_22288085	KJ11_085	11	22288085	Cheon et al. 2018
987	chr11_22495597	KJ11_086	11	22495597	Cheon et al. 2019
988	chr11_22702187	KJ11_087	11	22702187	Cheon et al. 2018
989	chr11_22899600	KJ11_088	11	22899600	Cheon et al. 2019
990	chr11_23101149	KJ11_089	11	23101149	Cheon et al. 2018
991	chr11_23426303	KJ11_090	11	23426303	Cheon et al. 2019
992	chr11_23553576	KJ11_091	11	23553576	Cheon et al. 2018
993	chr11_23754037	KJ11_092	11	23754037	Cheon et al. 2019
994	chr11_25542171	KJ11_095	11	25542171	Cheon et al. 2018
995	chr11_25557823	KJ11_096	11	25557823	Cheon et al. 2019
996	chr11_27029658	KJ11_097	11	27029658	Cheon et al. 2018
997	chr11_27209749	KJ11_098	11	27209749	Cheon et al. 2019
998	chr11_27579717	KJ11_099	11	27579717	Cheon et al. 2018
999	chr11_27626227	KJ11_100	11	27626227	Cheon et al. 2019
1000	chr11_27843952	KJ11_101	11	27843952	Cheon et al. 2018
1001	chr11_28187137	KJ11_102	11	28187137	Cheon et al. 2019
1002	chr11_28739183	KJ11_103	11	28739183	Cheon et al. 2018
1003	chr11_28957960	KJ11_104	11	28957960	Cheon et al. 2019
1004	chr12_357315	KJ12_001	12	357315	Cheon et al. 2018
1005	chr12_576240	KJ12_002	12	576240	Cheon et al. 2019
1006	chr12_1095997	KJ12_003	12	1095997	Cheon et al. 2018
1007	chr12_2146459	KJ12_004	12	2146459	Cheon et al. 2019
1008	chr12_3394821	KJ12_005	12	3394821	Cheon et al. 2018
1009	chr12_3580379	KJ12_006	12	3580379	Cheon et al. 2019
1010	chr12_3791039	KJ12_007	12	3791039	Cheon et al. 2018
1011	chr12_4055380	KJ12_008	12	4055380	Cheon et al. 2019
1012	chr12_4218137	KJ12_009	12	4218137	Cheon et al. 2018
1013	chr12_4591704	KJ12_010	12	4591704	Cheon et al. 2019
1014	chr12_4802189	KJ12_011	12	4802189	Cheon et al. 2018
1015	chr12_5021887	KJ12_012	12	5021887	Cheon et al. 2019
1016	chr12_5273365	KJ12_013	12	5273365	Cheon et al. 2018
1017	chr12_5486498	KJ12_014	12	5486498	Cheon et al. 2019
1018	chr12_5699135	KJ12_015	12	5699135	Cheon et al. 2018
1019	chr12_5782882	KJ12_016	12	5782882	Cheon et al. 2019
1020	chr12_6810046	KJ12_017	12	6810046	Cheon et al. 2018
1021	chr12_7100606	KJ12_018	12	7100606	Cheon et al. 2019
1022	chr12_9489380	KJ12_023	12	9489380	Cheon et al. 2018
1023	chr12_9531486	KJ12_024	12	9531486	Cheon et al. 2019
1024	chr12_10409212	KJ12_025	12	10409212	Cheon et al. 2018
1025	chr12_10614915	KJ12_026	12	10614915	Cheon et al. 2019
1026	chr12_11258678	KJ12_028	12	11258678	Cheon et al. 2019
1027	chr12_11965502	KJ12_029	12	11965502	Cheon et al. 2018
1028	chr12_12418159	KJ12_030	12	12418159	Cheon et al. 2019
1029	chr12_12937191	KJ12_033	12	12937191	Cheon et al. 2018
1030	chr12_13958031	KJ12_035	12	13958031	Cheon et al. 2018
1031	chr12_14173587	KJ12_036	12	14173587	Cheon et al. 2019
1032	chr12_14360470	KJ12_037	12	14360470	Cheon et al. 2018
1033	chr12_14669321	KJ12_038	12	14669321	Cheon et al. 2019
1034	chr12_15190673	KJ12_040	12	15190673	Cheon et al. 2019
1035	chr12_15328542	KJ12_041	12	15328542	Cheon et al. 2018
1036	chr12_15663475	KJ12_042	12	15663475	Cheon et al. 2019
1037	chr12_15839951	KJ12_043	12	15839951	Cheon et al. 2018
1038	chr12_16097568	KJ12_044	12	16097568	Cheon et al. 2019
1039	chr12_16493747	KJ12_045	12	16493747	Cheon et al. 2018
1040	chr12_16697390	KJ12_046	12	16697390	Cheon et al. 2019
1041	chr12_19885739	KJ12_051	12	19885739	Cheon et al. 2018
1042	chr12_21117596	KJ12_054	12	21117596	Cheon et al. 2019
1043	chr12_21484803	KJ12_055	12	21484803	Cheon et al. 2018
1044	chr12_21903642	KJ12_056	12	21903642	Cheon et al. 2019
1045	chr12_22115896	KJ12_057	12	22115896	Cheon et al. 2018
1046	chr12_22479641	KJ12_058	12	22479641	Cheon et al. 2019
1047	chr12_23255904	KJ12_059	12	23255904	Cheon et al. 2018
1048	chr12_23446940	KJ12_060	12	23446940	Cheon et al. 2019
1049	chr12_25291346	KJ12_061	12	25291346	Cheon et al. 2018
1050	chr12_25427169	KJ12_062	12	25427169	Cheon et al. 2019
1051	chr12_25549618	KJ12_063	12	25549618	Cheon et al. 2018
1052	chr12_26066441	KJ12_064	12	26066441	Cheon et al. 2019
1053	chr12_26277111	KJ12_066	12	26277111	Cheon et al. 2019
1054	chr12_26557893	KJ12_067	12	26557893	Cheon et al. 2018
1055	chr1_6597130	KJS01_001	1	6597130	Cheon et al. 2020
1056	chr1_6802927	KJS01_002	1	6802927	Cheon et al. 2020
1057	chr1_6950338	KJS01_003	1	6950338	Cheon et al. 2020
1058	chr1_14249773	KJS01_004	1	14249773	Cheon et al. 2020
1059	chr1_14710701	KJS01_006	1	14710701	Cheon et al. 2020
1060	chr1_22359292	KJS01_009	1	22359292	Cheon et al. 2020
1061	chr1_22645446	KJS01_010	1	22645446	Cheon et al. 2020
1062	chr1_25548141	KJS01_013	1	25548141	Cheon et al. 2020
1063	chr1_25906183	KJS01_015	1	25906183	Cheon et al. 2020
1064	chr1_26112748	KJS01_016	1	26112748	Cheon et al. 2020
1065	chr1_26493696	KJS01_018	1	26493696	Cheon et al. 2020
1066	chr1_26703729	KJS01_019	1	26703729	Cheon et al. 2020
1067	chr1_26892988	KJS01_020	1	26892988	Cheon et al. 2020
1068	chr1_31000992	KJS01_022	1	31000992	Cheon et al. 2020
1069	chr1_31246608	KJS01_023	1	31246608	Cheon et al. 2020
1070	chr1_31508266	KJS01_024	1	31508266	Cheon et al. 2020
1071	chr1_31720419	KJS01_025	1	31720419	Cheon et al. 2020
1072	chr1_37284842	KJS01_026	1	37284842	Cheon et al. 2020
1073	chr1_37540963	KJS01_028	1	37540963	Cheon et al. 2020
1074	chr2_118723	KJS02_001	2	118723	Cheon et al. 2020
1075	chr2_390336	KJS02_002	2	390336	Cheon et al. 2020
1076	chr2_603490	KJS02_003	2	603490	Cheon et al. 2020
1077	chr2_1139715	KJS02_004	2	1139715	Cheon et al. 2020
1078	chr2_1464369	KJS02_005	2	1464369	Cheon et al. 2020
1079	chr2_1920981	KJS02_006	2	1920981	Cheon et al. 2020
1080	chr2_7581871	KJS02_007	2	7581871	Cheon et al. 2020
1081	chr2_8857888	KJS02_009	2	8857888	Cheon et al. 2020
1082	chr2_8917955	KJS02_010	2	8917955	Cheon et al. 2020
1083	chr2_11549357	KJS02_011	2	11549357	Cheon et al. 2020
1084	chr2_12153399	KJS02_014	2	12153399	Cheon et al. 2020
1085	chr2_15300681	KJS02_015	2	15300681	Cheon et al. 2020
1086	chr2_16123749	KJS02_016	2	16123749	Cheon et al. 2020
1087	chr2_17328724	KJS02_017	2	17328724	Cheon et al. 2020
1088	chr2_17486274	KJS02_018	2	17486274	Cheon et al. 2020
1089	chr2_17853792	KJS02_020	2	17853792	Cheon et al. 2020
1090	chr2_18072082	KJS02_021	2	18072082	Cheon et al. 2020
1091	chr2_18128941	KJS02_022	2	18128941	Cheon et al. 2020
1092	chr2_27272711	KJS02_023	2	27272711	Cheon et al. 2020
1093	chr2_28099028	KJS02_027	2	28099028	Cheon et al. 2020
1094	chr2_28329161	KJS02_028	2	28329161	Cheon et al. 2020
1095	chr2_28487730	KJS02_029	2	28487730	Cheon et al. 2020
1096	chr2_30196217	KJS02_031	2	30196217	Cheon et al. 2020
1097	chr2_30815946	KJS02_034	2	30815946	Cheon et al. 2020
1098	chr2_31004451	KJS02_035	2	31004451	Cheon et al. 2020
1099	chr2_31113969	KJS02_036	2	31113969	Cheon et al. 2020
1100	chr3_3595445	KJS03_003	3	3595445	Cheon et al. 2020
1101	chr3_4007709	KJS03_005	3	4007709	Cheon et al. 2020
1102	chr3_9601602	KJS03_006	3	9601602	Cheon et al. 2020
1103	chr3_10467906	KJS03_007	3	10467906	Cheon et al. 2020
1104	chr3_13776057	KJS03_009	3	13776057	Cheon et al. 2020
1105	chr3_14106798	KJS03_010	3	14106798	Cheon et al. 2020
1106	chr3_14171041	KJS03_011	3	14171041	Cheon et al. 2020
1107	chr3_14288844	KJS03_012	3	14288844	Cheon et al. 2020
1108	chr3_14830128	KJS03_013	3	14830128	Cheon et al. 2020
1109	chr3_21309886	KJS03_016	3	21309886	Cheon et al. 2020
1110	chr3_22783071	KJS03_018	3	22783071	Cheon et al. 2020
1111	chr3_23491435	KJS03_020	3	23491435	Cheon et al. 2020
1112	chr3_23957624	KJS03_022	3	23957624	Cheon et al. 2020
1113	chr3_24172246	KJS03_023	3	24172246	Cheon et al. 2020
1114	chr3_25091244	KJS03_024	3	25091244	Cheon et al. 2020
1115	chr3_27996878	KJS03_026	3	27996878	Cheon et al. 2020
1116	chr3_29187252	KJS03_027	3	29187252	Cheon et al. 2020
1117	chr3_32608218	KJS03_028	3	32608218	Cheon et al. 2020
1118	chr3_32808105	KJS03_029	3	32808105	Cheon et al. 2020
1119	chr3_33002005	KJS03_030	3	33002005	Cheon et al. 2020
1120	chr3_33148842	KJS03_031	3	33148842	Cheon et al. 2020
1121	chr3_34900043	KJS03_032	3	34900043	Cheon et al. 2020
1122	chr3_35942128	KJS03_034	3	35942128	Cheon et al. 2020
1123	chr4_12534847	KJS04_001	4	12534847	Cheon et al. 2020
1124	chr4_12778516	KJS04_002	4	12778516	Cheon et al. 2020
1125	chr4_13404485	KJS04_004	4	13404485	Cheon et al. 2020
1126	chr4_13640788	KJS04_005	4	13640788	Cheon et al. 2020
1127	chr4_13798238	KJS04_006	4	13798238	Cheon et al. 2020
1128	chr4_16021780	KJS04_008	4	16021780	Cheon et al. 2020
1129	chr4_16999319	KJS04_011	4	16999319	Cheon et al. 2020
1130	chr4_17157142	KJS04_012	4	17157142	Cheon et al. 2020
1131	chr4_18368972	KJS04_013	4	18368972	Cheon et al. 2020
1132	chr4_18599368	KJS04_014	4	18599368	Cheon et al. 2020
1133	chr4_18899549	KJS04_016	4	18899549	Cheon et al. 2020
1134	chr4_19211611	KJS04_017	4	19211611	Cheon et al. 2020
1135	chr4_21305446	KJS04_019	4	21305446	Cheon et al. 2020
1136	chr4_22760222	KJS04_021	4	22760222	Cheon et al. 2020
1137	chr4_23114102	KJS04_022	4	23114102	Cheon et al. 2020
1138	chr4_23126372	KJS04_023	4	23126372	Cheon et al. 2020
1139	chr4_23485871	KJS04_025	4	23485871	Cheon et al. 2020
1140	chr4_25164916	KJS04_027	4	25164916	Cheon et al. 2020
1141	chr4_25947245	KJS04_028	4	25947245	Cheon et al. 2020
1142	chr4_26227955	KJS04_030	4	26227955	Cheon et al. 2020
1143	chr4_26422660	KJS04_031	4	26422660	Cheon et al. 2020
1144	chr4_29405465	KJS04_034	4	29405465	Cheon et al. 2020
1145	chr4_29594692	KJS04_035	4	29594692	Cheon et al. 2020
1146	chr4_29751343	KJS04_036	4	29751343	Cheon et al. 2020
1147	chr5_3172800	KJS05_001	5	3172800	Cheon et al. 2020
1148	chr5_4663967	KJS05_002	5	4663967	Cheon et al. 2020
1149	chr5_9316830	KJS05_007	5	9316830	Cheon et al. 2020
1150	chr5_9519668	KJS05_008	5	9519668	Cheon et al. 2020
1151	chr5_12087975	KJS05_015	5	12087975	Cheon et al. 2020
1152	chr5_12458461	KJS05_016	5	12458461	Cheon et al. 2020
1153	chr5_13232318	KJS05_018	5	13232318	Cheon et al. 2020
1154	chr5_13602020	KJS05_019	5	13602020	Cheon et al. 2020
1155	chr5_14541042	KJS05_022	5	14541042	Cheon et al. 2020
1156	chr5_21280487	KJS05_028	5	21280487	Cheon et al. 2020
1157	chr5_21567051	KJS05_029	5	21567051	Cheon et al. 2020
1158	chr5_28816449	KJS05_030	5	28816449	Cheon et al. 2020
1159	chr5_28853059	KJS05_031	5	28853059	Cheon et al. 2020
1160	chr5_29217223	KJS05_032	5	29217223	Cheon et al. 2020
1161	chr5_29590621	KJS05_033	5	29590621	Cheon et al. 2020
1162	chr6_1455037	KJS06_001	6	1455037	Cheon et al. 2020
1163	chr6_2438361	KJS06_003	6	2438361	Cheon et al. 2020
1164	chr6_12329977	KJS06_006	6	12329977	Cheon et al. 2020
1165	chr6_12772228	KJS06_008	6	12772228	Cheon et al. 2020
1166	chr6_20551516	KJS06_009	6	20551516	Cheon et al. 2020
1167	chr6_20800091	KJS06_010	6	20800091	Cheon et al. 2020
1168	chr6_20976276	KJS06_011	6	20976276	Cheon et al. 2020
1169	chr6_21537543	KJS06_012	6	21537543	Cheon et al. 2020
1170	chr6_24268236	KJS06_013	6	24268236	Cheon et al. 2020
1171	chr6_24682553	KJS06_015	6	24682553	Cheon et al. 2020
1172	chr6_26747288	KJS06_017	6	26747288	Cheon et al. 2020
1173	chr6_27209983	KJS06_019	6	27209983	Cheon et al. 2020
1174	chr6_27423294	KJS06_020	6	27423294	Cheon et al. 2020
1175	chr7_5205982	KJS07_001	7	5205982	Cheon et al. 2020
1176	chr7_5895703	KJS07_003	7	5895703	Cheon et al. 2020
1177	chr7_10088239	KJS07_007	7	10088239	Cheon et al. 2020
1178	chr7_10654969	KJS07_010	7	10654969	Cheon et al. 2020
1179	chr7_10865813	KJS07_011	7	10865813	Cheon et al. 2020
1180	chr7_11294662	KJS07_012	7	11294662	Cheon et al. 2020
1181	chr7_11590149	KJS07_013	7	11590149	Cheon et al. 2020
1182	chr7_11777418	KJS07_014	7	11777418	Cheon et al. 2020
1183	chr7_11876978	KJS07_015	7	11876978	Cheon et al. 2020
1184	chr7_12740701	KJS07_018	7	12740701	Cheon et al. 2020
1185	chr7_12903072	KJS07_019	7	12903072	Cheon et al. 2020
1186	chr7_13501565	KJS07_021	7	13501565	Cheon et al. 2020
1187	chr7_13701611	KJS07_022	7	13701611	Cheon et al. 2020
1188	chr7_26092398	KJS07_027	7	26092398	Cheon et al. 2020
1189	chr7_27244224	KJS07_029	7	27244224	Cheon et al. 2020
1190	chr8_21463546	KJS08_001	8	21463546	Cheon et al. 2020
1191	chr8_22119651	KJS08_003	8	22119651	Cheon et al. 2020
1192	chr8_23040011	KJS08_006	8	23040011	Cheon et al. 2020
1193	chr10_5813299	KJS10_001	10	5813299	Cheon et al. 2020
1194	chr10_6011207	KJS10_002	10	6011207	Cheon et al. 2020
1195	chr10_6099319	KJS10_003	10	6099319	Cheon et al. 2020
1196	chr10_7508870	KJS10_006	10	7508870	Cheon et al. 2020
1197	chr10_7802770	KJS10_007	10	7802770	Cheon et al. 2020
1198	chr10_8109463	KJS10_008	10	8109463	Cheon et al. 2020
1199	chr10_9601267	KJS10_011	10	9601267	Cheon et al. 2020
1200	chr10_9971897	KJS10_012	10	9971897	Cheon et al. 2020
1201	chr10_10635040	KJS10_014	10	10635040	Cheon et al. 2020
1202	chr10_11010846	KJS10_015	10	11010846	Cheon et al. 2020
1203	chr10_11408139	KJS10_016	10	11408139	Cheon et al. 2020
1204	chr10_12001021	KJS10_017	10	12001021	Cheon et al. 2020
1205	chr10_12944024	KJS10_019	10	12944024	Cheon et al. 2020
1206	chr10_13763356	KJS10_021	10	13763356	Cheon et al. 2020
1207	chr11_1231705	KJS11_001	11	1231705	Cheon et al. 2020
1208	chr11_1825100	KJS11_003	11	1825100	Cheon et al. 2020
1209	chr11_1950899	KJS11_004	11	1950899	Cheon et al. 2020
1210	chr11_2097945	KJS11_005	11	2097945	Cheon et al. 2020
1211	chr11_8414156	KJS11_007	11	8414156	Cheon et al. 2020
1212	chr11_8793721	KJS11_009	11	8793721	Cheon et al. 2020
1213	chr11_9053289	KJS11_010	11	9053289	Cheon et al. 2020
1214	chr11_24210972	KJS11_012	11	24210972	Cheon et al. 2020
1215	chr11_24229633	KJS11_013	11	24229633	Cheon et al. 2020
1216	chr11_24618889	KJS11_014	11	24618889	Cheon et al. 2020
1217	chr11_25083312	KJS11_016	11	25083312	Cheon et al. 2020
1218	chr11_25359888	KJS11_019	11	25359888	Cheon et al. 2020
1219	chr12_1433766	KJS12_001	12	1433766	Cheon et al. 2020
1220	chr12_2319598	KJS12_002	12	2319598	Cheon et al. 2020
1221	chr12_2901299	KJS12_003	12	2901299	Cheon et al. 2020
1222	chr12_13763813	KJS12_005	12	13763813	Cheon et al. 2020
1223	chr12_17004142	KJS12_006	12	17004142	Cheon et al. 2020
1224	chr12_24117295	KJS12_008	12	24117295	Cheon et al. 2020
1225	chr12_24239197	KJS12_009	12	24239197	Cheon et al. 2020
1526	chr7_22119347	RSTV1_01	7	22119347	Arbelaez et al. 2019
73	chr1_10100605	s01_10100605	1	10100605	Arbelaez et al. 2019
74	chr1_10202227	s01_10202227	1	10202227	Arbelaez et al. 2019
7	chr1_1044946	s01_1044946	1	1044946	Arbelaez et al. 2019
78	chr1_10645259	s01_10645259	1	10645259	Arbelaez et al. 2019
80	chr1_10846090	s01_10846090	1	10846090	Arbelaez et al. 2019
83	chr1_11250486	s01_11250486	1	11250486	Arbelaez et al. 2019
89	chr1_12216652	s01_12216652	1	12216652	Arbelaez et al. 2019
90	chr1_12335190	s01_12335190	1	12335190	Arbelaez et al. 2019
91	chr1_12941687	s01_12941687	1	12941687	Arbelaez et al. 2019
93	chr1_13121543	s01_13121543	1	13121543	Arbelaez et al. 2019
97	chr1_13442034	s01_13442034	1	13442034	Arbelaez et al. 2019
99	chr1_13777831	s01_13777831	1	13777831	Arbelaez et al. 2019
100	chr1_13902629	s01_13902629	1	13902629	Arbelaez et al. 2019
11	chr1_1410467	s01_1410467	1	1410467	Arbelaez et al. 2019
103	chr1_14375630	s01_14375630	1	14375630	Arbelaez et al. 2019
104	chr1_14508449	s01_14508449	1	14508449	Arbelaez et al. 2019
106	chr1_14937939	s01_14937939	1	14937939	Arbelaez et al. 2019
108	chr1_15092392	s01_15092392	1	15092392	Arbelaez et al. 2019
12	chr1_1532281	s01_1532281	1	1532281	Arbelaez et al. 2019
111	chr1_15393352	s01_15393352	1	15393352	Arbelaez et al. 2019
112	chr1_15883941	s01_15883941	1	15883941	Arbelaez et al. 2019
113	chr1_16113201	s01_16113201	1	16113201	Arbelaez et al. 2019
115	chr1_16284866	s01_16284866	1	16284866	Arbelaez et al. 2019
116	chr1_16596849	s01_16596849	1	16596849	Arbelaez et al. 2019
118	chr1_17008280	s01_17008280	1	17008280	Arbelaez et al. 2019
120	chr1_17219764	s01_17219764	1	17219764	Arbelaez et al. 2019
122	chr1_17426109	s01_17426109	1	17426109	Arbelaez et al. 2019
125	chr1_17743869	s01_17743869	1	17743869	Arbelaez et al. 2019
127	chr1_18102213	s01_18102213	1	18102213	Arbelaez et al. 2019
128	chr1_18332445	s01_18332445	1	18332445	Arbelaez et al. 2019
129	chr1_18501890	s01_18501890	1	18501890	Arbelaez et al. 2019
135	chr1_18891591	s01_18891591	1	18891591	Arbelaez et al. 2019
140	chr1_19308987	s01_19308987	1	19308987	Arbelaez et al. 2019
1	chr1_194844	s01_194844	1	194844	Arbelaez et al. 2019
143	chr1_20262103	s01_20262103	1	20262103	Arbelaez et al. 2019
145	chr1_20418175	s01_20418175	1	20418175	Arbelaez et al. 2019
147	chr1_20562598	s01_20562598	1	20562598	Arbelaez et al. 2019
15	chr1_2100471	s01_2100471	1	2100471	Arbelaez et al. 2019
148	chr1_21011077	s01_21011077	1	21011077	Arbelaez et al. 2019
152	chr1_22328417	s01_22328417	1	22328417	Arbelaez et al. 2019
156	chr1_22554065	s01_22554065	1	22554065	Arbelaez et al. 2019
17	chr1_2277961	s01_2277961	1	2277961	Arbelaez et al. 2019
158	chr1_22829240	s01_22829240	1	22829240	Arbelaez et al. 2019
160	chr1_23091103	s01_23091103	1	23091103	Arbelaez et al. 2019
162	chr1_23240729	s01_23240729	1	23240729	Arbelaez et al. 2019
164	chr1_23656773	s01_23656773	1	23656773	Arbelaez et al. 2019
171	chr1_24050118	s01_24050118	1	24050118	Arbelaez et al. 2019
176	chr1_24515673	s01_24515673	1	24515673	Arbelaez et al. 2019
178	chr1_24722142	s01_24722142	1	24722142	Arbelaez et al. 2019
21	chr1_2532252	s01_2532252	1	2532252	Arbelaez et al. 2019
187	chr1_26187514	s01_26187514	1	26187514	Arbelaez et al. 2019
192	chr1_27046296	s01_27046296	1	27046296	Arbelaez et al. 2019
194	chr1_27330724	s01_27330724	1	27330724	Arbelaez et al. 2019
198	chr1_28142020	s01_28142020	1	28142020	Arbelaez et al. 2019
199	chr1_28478660	s01_28478660	1	28478660	Arbelaez et al. 2019
25	chr1_2865232	s01_2865232	1	2865232	Arbelaez et al. 2019
200	chr1_28826738	s01_28826738	1	28826738	Arbelaez et al. 2019
204	chr1_30341513	s01_30341513	1	30341513	Arbelaez et al. 2019
205	chr1_30569798	s01_30569798	1	30569798	Arbelaez et al. 2019
208	chr1_31396842	s01_31396842	1	31396842	Arbelaez et al. 2019
213	chr1_32041358	s01_32041358	1	32041358	Arbelaez et al. 2019
217	chr1_32359998	s01_32359998	1	32359998	Arbelaez et al. 2019
27	chr1_3236648	s01_3236648	1	3236648	Arbelaez et al. 2019
219	chr1_32563460	s01_32563460	1	32563460	Arbelaez et al. 2019
222	chr1_33164035	s01_33164035	1	33164035	Arbelaez et al. 2019
225	chr1_33472174	s01_33472174	1	33472174	Arbelaez et al. 2019
227	chr1_33695501	s01_33695501	1	33695501	Arbelaez et al. 2019
229	chr1_33901317	s01_33901317	1	33901317	Arbelaez et al. 2019
231	chr1_34201543	s01_34201543	1	34201543	Arbelaez et al. 2019
233	chr1_34363755	s01_34363755	1	34363755	Arbelaez et al. 2019
234	chr1_34508997	s01_34508997	1	34508997	Arbelaez et al. 2019
240	chr1_35259107	s01_35259107	1	35259107	Arbelaez et al. 2019
30	chr1_3529691	s01_3529691	1	3529691	Arbelaez et al. 2019
242	chr1_35794891	s01_35794891	1	35794891	Arbelaez et al. 2019
244	chr1_36150523	s01_36150523	1	36150523	Arbelaez et al. 2019
245	chr1_36419842	s01_36419842	1	36419842	Arbelaez et al. 2019
251	chr1_37274755	s01_37274755	1	37274755	Arbelaez et al. 2019
2	chr1_375814	s01_375814	1	375814	Arbelaez et al. 2019
254	chr1_37680628	s01_37680628	1	37680628	Arbelaez et al. 2019
255	chr1_37920337	s01_37920337	1	37920337	Arbelaez et al. 2019
260	chr1_38632196	s01_38632196	1	38632196	Arbelaez et al. 2019
263	chr1_39548506	s01_39548506	1	39548506	Arbelaez et al. 2019
267	chr1_39955529	s01_39955529	1	39955529	Arbelaez et al. 2019
270	chr1_40699488	s01_40699488	1	40699488	Arbelaez et al. 2019
272	chr1_41020155	s01_41020155	1	41020155	Arbelaez et al. 2019
32	chr1_4167976	s01_4167976	1	4167976	Arbelaez et al. 2019
280	chr1_41911439	s01_41911439	1	41911439	Arbelaez et al. 2019
284	chr1_42425574	s01_42425574	1	42425574	Arbelaez et al. 2019
286	chr1_42555349	s01_42555349	1	42555349	Arbelaez et al. 2019
289	chr1_42877440	s01_42877440	1	42877440	Arbelaez et al. 2019
34	chr1_4307004	s01_4307004	1	4307004	Arbelaez et al. 2019
291	chr1_43074709	s01_43074709	1	43074709	Arbelaez et al. 2019
35	chr1_5064126	s01_5064126	1	5064126	Arbelaez et al. 2019
44	chr1_5510350	s01_5510350	1	5510350	Arbelaez et al. 2019
47	chr1_6130240	s01_6130240	1	6130240	Arbelaez et al. 2019
48	chr1_6543217	s01_6543217	1	6543217	Arbelaez et al. 2019
51	chr1_6829682	s01_6829682	1	6829682	Arbelaez et al. 2019
56	chr1_7068516	s01_7068516	1	7068516	Arbelaez et al. 2019
3	chr1_717702	s01_717702	1	717702	Arbelaez et al. 2019
57	chr1_7563923	s01_7563923	1	7563923	Arbelaez et al. 2019
61	chr1_8245748	s01_8245748	1	8245748	Arbelaez et al. 2019
65	chr1_8760562	s01_8760562	1	8760562	Arbelaez et al. 2019
68	chr1_9164508	s01_9164508	1	9164508	Arbelaez et al. 2019
6	chr1_932866	s01_932866	1	932866	Arbelaez et al. 2019
294	chr2_103273	s02_103273	2	103273	Arbelaez et al. 2019
369	chr2_10555263	s02_10555263	2	10555263	Arbelaez et al. 2019
304	chr2_1082416	s02_1082416	2	1082416	Arbelaez et al. 2019
371	chr2_10874369	s02_10874369	2	10874369	Arbelaez et al. 2019
374	chr2_11102648	s02_11102648	2	11102648	Arbelaez et al. 2019
378	chr2_11701123	s02_11701123	2	11701123	Arbelaez et al. 2019
307	chr2_1288670	s02_1288670	2	1288670	Arbelaez et al. 2019
308	chr2_1380527	s02_1380527	2	1380527	Arbelaez et al. 2019
381	chr2_13962476	s02_13962476	2	13962476	Arbelaez et al. 2019
310	chr2_1487009	s02_1487009	2	1487009	Arbelaez et al. 2019
386	chr2_16224316	s02_16224316	2	16224316	Arbelaez et al. 2019
387	chr2_16464872	s02_16464872	2	16464872	Arbelaez et al. 2019
311	chr2_1660713	s02_1660713	2	1660713	Arbelaez et al. 2019
388	chr2_16919033	s02_16919033	2	16919033	Arbelaez et al. 2019
390	chr2_17160895	s02_17160895	2	17160895	Arbelaez et al. 2019
398	chr2_18370293	s02_18370293	2	18370293	Arbelaez et al. 2019
399	chr2_18811812	s02_18811812	2	18811812	Arbelaez et al. 2019
401	chr2_19283769	s02_19283769	2	19283769	Arbelaez et al. 2019
403	chr2_19642635	s02_19642635	2	19642635	Arbelaez et al. 2019
406	chr2_19981768	s02_19981768	2	19981768	Arbelaez et al. 2019
314	chr2_2008370	s02_2008370	2	2008370	Arbelaez et al. 2019
408	chr2_20145859	s02_20145859	2	20145859	Arbelaez et al. 2019
412	chr2_20824958	s02_20824958	2	20824958	Arbelaez et al. 2019
413	chr2_21060669	s02_21060669	2	21060669	Arbelaez et al. 2019
418	chr2_21832777	s02_21832777	2	21832777	Arbelaez et al. 2019
423	chr2_22340836	s02_22340836	2	22340836	Arbelaez et al. 2019
426	chr2_23073414	s02_23073414	2	23073414	Arbelaez et al. 2019
315	chr2_2334960	s02_2334960	2	2334960	Arbelaez et al. 2019
429	chr2_23396915	s02_23396915	2	23396915	Arbelaez et al. 2019
430	chr2_23538743	s02_23538743	2	23538743	Arbelaez et al. 2019
434	chr2_23852677	s02_23852677	2	23852677	Arbelaez et al. 2019
437	chr2_24168273	s02_24168273	2	24168273	Arbelaez et al. 2019
439	chr2_24264653	s02_24264653	2	24264653	Arbelaez et al. 2019
447	chr2_24772301	s02_24772301	2	24772301	Arbelaez et al. 2019
449	chr2_24887320	s02_24887320	2	24887320	Arbelaez et al. 2019
452	chr2_25193353	s02_25193353	2	25193353	Arbelaez et al. 2019
453	chr2_25415397	s02_25415397	2	25415397	Arbelaez et al. 2019
455	chr2_25949636	s02_25949636	2	25949636	Arbelaez et al. 2019
459	chr2_26406867	s02_26406867	2	26406867	Arbelaez et al. 2019
465	chr2_27548893	s02_27548893	2	27548893	Arbelaez et al. 2019
467	chr2_28049479	s02_28049479	2	28049479	Arbelaez et al. 2019
316	chr2_2819095	s02_2819095	2	2819095	Arbelaez et al. 2019
470	chr2_28211032	s02_28211032	2	28211032	Arbelaez et al. 2019
473	chr2_28778297	s02_28778297	2	28778297	Arbelaez et al. 2019
477	chr2_29415200	s02_29415200	2	29415200	Arbelaez et al. 2019
478	chr2_29568762	s02_29568762	2	29568762	Arbelaez et al. 2019
479	chr2_29718772	s02_29718772	2	29718772	Arbelaez et al. 2019
484	chr2_30345735	s02_30345735	2	30345735	Arbelaez et al. 2019
485	chr2_30530432	s02_30530432	2	30530432	Arbelaez et al. 2019
490	chr2_31135814	s02_31135814	2	31135814	Arbelaez et al. 2019
318	chr2_3136771	s02_3136771	2	3136771	Arbelaez et al. 2019
492	chr2_31403314	s02_31403314	2	31403314	Arbelaez et al. 2019
494	chr2_31678155	s02_31678155	2	31678155	Arbelaez et al. 2019
296	chr2_316859	s02_316859	2	316859	Arbelaez et al. 2019
495	chr2_31914486	s02_31914486	2	31914486	Arbelaez et al. 2019
497	chr2_32101050	s02_32101050	2	32101050	Arbelaez et al. 2019
499	chr2_32303539	s02_32303539	2	32303539	Arbelaez et al. 2019
503	chr2_33035683	s02_33035683	2	33035683	Arbelaez et al. 2019
510	chr2_34072964	s02_34072964	2	34072964	Arbelaez et al. 2019
511	chr2_34425408	s02_34425408	2	34425408	Arbelaez et al. 2019
515	chr2_34707946	s02_34707946	2	34707946	Arbelaez et al. 2019
321	chr2_3477202	s02_3477202	2	3477202	Arbelaez et al. 2019
518	chr2_34865754	s02_34865754	2	34865754	Arbelaez et al. 2019
519	chr2_34868096	s02_34868096	2	34868096	Arbelaez et al. 2019
526	chr2_35216781	s02_35216781	2	35216781	Arbelaez et al. 2019
527	chr2_35401891	s02_35401891	2	35401891	Arbelaez et al. 2019
529	chr2_35568365	s02_35568365	2	35568365	Arbelaez et al. 2019
324	chr2_3830712	s02_3830712	2	3830712	Arbelaez et al. 2019
325	chr2_4047646	s02_4047646	2	4047646	Arbelaez et al. 2019
326	chr2_4342883	s02_4342883	2	4342883	Arbelaez et al. 2019
331	chr2_4823175	s02_4823175	2	4823175	Arbelaez et al. 2019
333	chr2_4930742	s02_4930742	2	4930742	Arbelaez et al. 2019
298	chr2_494373	s02_494373	2	494373	Arbelaez et al. 2019
336	chr2_5231169	s02_5231169	2	5231169	Arbelaez et al. 2019
342	chr2_5836334	s02_5836334	2	5836334	Arbelaez et al. 2019
343	chr2_6186335	s02_6186335	2	6186335	Arbelaez et al. 2019
300	chr2_629512	s02_629512	2	629512	Arbelaez et al. 2019
344	chr2_6373446	s02_6373446	2	6373446	Arbelaez et al. 2019
346	chr2_6805305	s02_6805305	2	6805305	Arbelaez et al. 2019
347	chr2_7342223	s02_7342223	2	7342223	Arbelaez et al. 2019
352	chr2_8019748	s02_8019748	2	8019748	Arbelaez et al. 2019
355	chr2_8814718	s02_8814718	2	8814718	Arbelaez et al. 2019
301	chr2_890901	s02_890901	2	890901	Arbelaez et al. 2019
362	chr2_9570228	s02_9570228	2	9570228	Arbelaez et al. 2019
364	chr2_9801099	s02_9801099	2	9801099	Arbelaez et al. 2019
365	chr2_9975660	s02_9975660	2	9975660	Arbelaez et al. 2019
598	chr3_10184356	s03_10184356	3	10184356	Arbelaez et al. 2019
600	chr3_10544320	s03_10544320	3	10544320	Arbelaez et al. 2019
601	chr3_10798982	s03_10798982	3	10798982	Arbelaez et al. 2019
604	chr3_11031220	s03_11031220	3	11031220	Arbelaez et al. 2019
605	chr3_11644944	s03_11644944	3	11644944	Arbelaez et al. 2019
607	chr3_11851886	s03_11851886	3	11851886	Arbelaez et al. 2019
609	chr3_12564300	s03_12564300	3	12564300	Arbelaez et al. 2019
545	chr3_1270943	s03_1270943	3	1270943	Arbelaez et al. 2019
616	chr3_13932387	s03_13932387	3	13932387	Arbelaez et al. 2019
618	chr3_14169727	s03_14169727	3	14169727	Arbelaez et al. 2019
621	chr3_14554651	s03_14554651	3	14554651	Arbelaez et al. 2019
623	chr3_14777813	s03_14777813	3	14777813	Arbelaez et al. 2019
546	chr3_1481412	s03_1481412	3	1481412	Arbelaez et al. 2019
631	chr3_15365726	s03_15365726	3	15365726	Arbelaez et al. 2019
643	chr3_17307455	s03_17307455	3	17307455	Arbelaez et al. 2019
549	chr3_1761412	s03_1761412	3	1761412	Arbelaez et al. 2019
646	chr3_17827706	s03_17827706	3	17827706	Arbelaez et al. 2019
649	chr3_18273682	s03_18273682	3	18273682	Arbelaez et al. 2019
650	chr3_18629240	s03_18629240	3	18629240	Arbelaez et al. 2019
655	chr3_19929911	s03_19929911	3	19929911	Arbelaez et al. 2019
660	chr3_21003404	s03_21003404	3	21003404	Arbelaez et al. 2019
553	chr3_2151496	s03_2151496	3	2151496	Arbelaez et al. 2019
665	chr3_22050510	s03_22050510	3	22050510	Arbelaez et al. 2019
671	chr3_22633713	s03_22633713	3	22633713	Arbelaez et al. 2019
674	chr3_23037368	s03_23037368	3	23037368	Arbelaez et al. 2019
675	chr3_23354868	s03_23354868	3	23354868	Arbelaez et al. 2019
677	chr3_23851835	s03_23851835	3	23851835	Arbelaez et al. 2019
681	chr3_24413888	s03_24413888	3	24413888	Arbelaez et al. 2019
682	chr3_24682521	s03_24682521	3	24682521	Arbelaez et al. 2019
686	chr3_25157655	s03_25157655	3	25157655	Arbelaez et al. 2019
687	chr3_25259336	s03_25259336	3	25259336	Arbelaez et al. 2019
691	chr3_25530777	s03_25530777	3	25530777	Arbelaez et al. 2019
692	chr3_25833182	s03_25833182	3	25833182	Arbelaez et al. 2019
695	chr3_26334305	s03_26334305	3	26334305	Arbelaez et al. 2019
696	chr3_26456796	s03_26456796	3	26456796	Arbelaez et al. 2019
697	chr3_26590992	s03_26590992	3	26590992	Arbelaez et al. 2019
699	chr3_26982172	s03_26982172	3	26982172	Arbelaez et al. 2019
701	chr3_27275567	s03_27275567	3	27275567	Arbelaez et al. 2019
702	chr3_27494934	s03_27494934	3	27494934	Arbelaez et al. 2019
704	chr3_27813704	s03_27813704	3	27813704	Arbelaez et al. 2019
708	chr3_28851199	s03_28851199	3	28851199	Arbelaez et al. 2019
557	chr3_2885423	s03_2885423	3	2885423	Arbelaez et al. 2019
710	chr3_29152266	s03_29152266	3	29152266	Arbelaez et al. 2019
712	chr3_29430694	s03_29430694	3	29430694	Arbelaez et al. 2019
713	chr3_30247826	s03_30247826	3	30247826	Arbelaez et al. 2019
715	chr3_30604896	s03_30604896	3	30604896	Arbelaez et al. 2019
716	chr3_31025197	s03_31025197	3	31025197	Arbelaez et al. 2019
718	chr3_31190989	s03_31190989	3	31190989	Arbelaez et al. 2019
719	chr3_31427789	s03_31427789	3	31427789	Arbelaez et al. 2019
722	chr3_31614921	s03_31614921	3	31614921	Arbelaez et al. 2019
724	chr3_31919761	s03_31919761	3	31919761	Arbelaez et al. 2019
725	chr3_32063693	s03_32063693	3	32063693	Arbelaez et al. 2019
727	chr3_32430702	s03_32430702	3	32430702	Arbelaez et al. 2019
728	chr3_32577650	s03_32577650	3	32577650	Arbelaez et al. 2019
732	chr3_32832500	s03_32832500	3	32832500	Arbelaez et al. 2019
734	chr3_33080942	s03_33080942	3	33080942	Arbelaez et al. 2019
736	chr3_33319900	s03_33319900	3	33319900	Arbelaez et al. 2019
738	chr3_33713486	s03_33713486	3	33713486	Arbelaez et al. 2019
558	chr3_3382980	s03_3382980	3	3382980	Arbelaez et al. 2019
740	chr3_34275405	s03_34275405	3	34275405	Arbelaez et al. 2019
741	chr3_34476308	s03_34476308	3	34476308	Arbelaez et al. 2019
742	chr3_34678981	s03_34678981	3	34678981	Arbelaez et al. 2019
744	chr3_35093761	s03_35093761	3	35093761	Arbelaez et al. 2019
745	chr3_35636092	s03_35636092	3	35636092	Arbelaez et al. 2019
746	chr3_35824355	s03_35824355	3	35824355	Arbelaez et al. 2019
748	chr3_36206765	s03_36206765	3	36206765	Arbelaez et al. 2019
561	chr3_3657643	s03_3657643	3	3657643	Arbelaez et al. 2019
564	chr3_4047654	s03_4047654	3	4047654	Arbelaez et al. 2019
566	chr3_4321231	s03_4321231	3	4321231	Arbelaez et al. 2019
539	chr3_484812	s03_484812	3	484812	Arbelaez et al. 2019
571	chr3_5109298	s03_5109298	3	5109298	Arbelaez et al. 2019
575	chr3_5880211	s03_5880211	3	5880211	Arbelaez et al. 2019
577	chr3_6283461	s03_6283461	3	6283461	Arbelaez et al. 2019
581	chr3_6902921	s03_6902921	3	6902921	Arbelaez et al. 2019
583	chr3_7605347	s03_7605347	3	7605347	Arbelaez et al. 2019
541	chr3_851785	s03_851785	3	851785	Arbelaez et al. 2019
588	chr3_8532555	s03_8532555	3	8532555	Arbelaez et al. 2019
589	chr3_8711509	s03_8711509	3	8711509	Arbelaez et al. 2019
590	chr3_9026803	s03_9026803	3	9026803	Arbelaez et al. 2019
592	chr3_9375374	s03_9375374	3	9375374	Arbelaez et al. 2019
594	chr3_9636224	s03_9636224	3	9636224	Arbelaez et al. 2019
595	chr3_9751213	s03_9751213	3	9751213	Arbelaez et al. 2019
596	chr3_9878813	s03_9878813	3	9878813	Arbelaez et al. 2019
754	chr4_1022225	s04_1022225	4	1022225	Arbelaez et al. 2019
808	chr4_10468507	s04_10468507	4	10468507	Arbelaez et al. 2019
810	chr4_10991011	s04_10991011	4	10991011	Arbelaez et al. 2019
756	chr4_1136986	s04_1136986	4	1136986	Arbelaez et al. 2019
812	chr4_11645506	s04_11645506	4	11645506	Arbelaez et al. 2019
815	chr4_11879947	s04_11879947	4	11879947	Arbelaez et al. 2019
816	chr4_11986644	s04_11986644	4	11986644	Arbelaez et al. 2019
818	chr4_12244931	s04_12244931	4	12244931	Arbelaez et al. 2019
819	chr4_12297152	s04_12297152	4	12297152	Arbelaez et al. 2019
822	chr4_12594753	s04_12594753	4	12594753	Arbelaez et al. 2019
823	chr4_12684621	s04_12684621	4	12684621	Arbelaez et al. 2019
827	chr4_13551673	s04_13551673	4	13551673	Arbelaez et al. 2019
829	chr4_13665093	s04_13665093	4	13665093	Arbelaez et al. 2019
833	chr4_14229856	s04_14229856	4	14229856	Arbelaez et al. 2019
834	chr4_14814591	s04_14814591	4	14814591	Arbelaez et al. 2019
835	chr4_15389648	s04_15389648	4	15389648	Arbelaez et al. 2019
836	chr4_15944977	s04_15944977	4	15944977	Arbelaez et al. 2019
838	chr4_16289829	s04_16289829	4	16289829	Arbelaez et al. 2019
839	chr4_16559384	s04_16559384	4	16559384	Arbelaez et al. 2019
840	chr4_16715200	s04_16715200	4	16715200	Arbelaez et al. 2019
759	chr4_1719865	s04_1719865	4	1719865	Arbelaez et al. 2019
845	chr4_17465113	s04_17465113	4	17465113	Arbelaez et al. 2019
847	chr4_17911519	s04_17911519	4	17911519	Arbelaez et al. 2019
849	chr4_18136052	s04_18136052	4	18136052	Arbelaez et al. 2019
853	chr4_18706317	s04_18706317	4	18706317	Arbelaez et al. 2019
856	chr4_19123643	s04_19123643	4	19123643	Arbelaez et al. 2019
858	chr4_19353709	s04_19353709	4	19353709	Arbelaez et al. 2019
750	chr4_193676	s04_193676	4	193676	Arbelaez et al. 2019
866	chr4_20507218	s04_20507218	4	20507218	Arbelaez et al. 2019
867	chr4_21237749	s04_21237749	4	21237749	Arbelaez et al. 2019
869	chr4_21517348	s04_21517348	4	21517348	Arbelaez et al. 2019
873	chr4_21864875	s04_21864875	4	21864875	Arbelaez et al. 2019
878	chr4_22808095	s04_22808095	4	22808095	Arbelaez et al. 2019
881	chr4_23248365	s04_23248365	4	23248365	Arbelaez et al. 2019
884	chr4_23526762	s04_23526762	4	23526762	Arbelaez et al. 2019
886	chr4_23846299	s04_23846299	4	23846299	Arbelaez et al. 2019
896	chr4_25245272	s04_25245272	4	25245272	Arbelaez et al. 2019
897	chr4_25437295	s04_25437295	4	25437295	Arbelaez et al. 2019
902	chr4_26309089	s04_26309089	4	26309089	Arbelaez et al. 2019
904	chr4_26545849	s04_26545849	4	26545849	Arbelaez et al. 2019
905	chr4_26832471	s04_26832471	4	26832471	Arbelaez et al. 2019
909	chr4_27540988	s04_27540988	4	27540988	Arbelaez et al. 2019
914	chr4_28004788	s04_28004788	4	28004788	Arbelaez et al. 2019
915	chr4_28901886	s04_28901886	4	28901886	Arbelaez et al. 2019
918	chr4_29533215	s04_29533215	4	29533215	Arbelaez et al. 2019
920	chr4_29715617	s04_29715617	4	29715617	Arbelaez et al. 2019
922	chr4_29881066	s04_29881066	4	29881066	Arbelaez et al. 2019
923	chr4_30174083	s04_30174083	4	30174083	Arbelaez et al. 2019
925	chr4_30438901	s04_30438901	4	30438901	Arbelaez et al. 2019
927	chr4_30879875	s04_30879875	4	30879875	Arbelaez et al. 2019
934	chr4_31509863	s04_31509863	4	31509863	Arbelaez et al. 2019
937	chr4_31678447	s04_31678447	4	31678447	Arbelaez et al. 2019
939	chr4_32038496	s04_32038496	4	32038496	Arbelaez et al. 2019
941	chr4_32189893	s04_32189893	4	32189893	Arbelaez et al. 2019
950	chr4_33073892	s04_33073892	4	33073892	Arbelaez et al. 2019
766	chr4_3411505	s04_3411505	4	3411505	Arbelaez et al. 2019
957	chr4_34643455	s04_34643455	4	34643455	Arbelaez et al. 2019
959	chr4_34925111	s04_34925111	4	34925111	Arbelaez et al. 2019
961	chr4_35395197	s04_35395197	4	35395197	Arbelaez et al. 2019
772	chr4_4456304	s04_4456304	4	4456304	Arbelaez et al. 2019
780	chr4_5111222	s04_5111222	4	5111222	Arbelaez et al. 2019
782	chr4_5625104	s04_5625104	4	5625104	Arbelaez et al. 2019
784	chr4_6027557	s04_6027557	4	6027557	Arbelaez et al. 2019
751	chr4_603494	s04_603494	4	603494	Arbelaez et al. 2019
786	chr4_6193569	s04_6193569	4	6193569	Arbelaez et al. 2019
789	chr4_6596219	s04_6596219	4	6596219	Arbelaez et al. 2019
793	chr4_7170237	s04_7170237	4	7170237	Arbelaez et al. 2019
794	chr4_7304413	s04_7304413	4	7304413	Arbelaez et al. 2019
798	chr4_7871436	s04_7871436	4	7871436	Arbelaez et al. 2019
799	chr4_8217877	s04_8217877	4	8217877	Arbelaez et al. 2019
802	chr4_8876854	s04_8876854	4	8876854	Arbelaez et al. 2019
1042	chr5_10539124	s05_10539124	5	10539124	Arbelaez et al. 2019
1043	chr5_10886331	s05_10886331	5	10886331	Arbelaez et al. 2019
1045	chr5_11679660	s05_11679660	5	11679660	Arbelaez et al. 2019
975	chr5_1277191	s05_1277191	5	1277191	Arbelaez et al. 2019
1051	chr5_13325546	s05_13325546	5	13325546	Arbelaez et al. 2019
1053	chr5_13768744	s05_13768744	5	13768744	Arbelaez et al. 2019
1055	chr5_14412355	s05_14412355	5	14412355	Arbelaez et al. 2019
1057	chr5_14643984	s05_14643984	5	14643984	Arbelaez et al. 2019
977	chr5_1487229	s05_1487229	5	1487229	Arbelaez et al. 2019
1058	chr5_14928105	s05_14928105	5	14928105	Arbelaez et al. 2019
1061	chr5_15567844	s05_15567844	5	15567844	Arbelaez et al. 2019
1062	chr5_16055903	s05_16055903	5	16055903	Arbelaez et al. 2019
1065	chr5_16500527	s05_16500527	5	16500527	Arbelaez et al. 2019
1067	chr5_16752221	s05_16752221	5	16752221	Arbelaez et al. 2019
1068	chr5_16955234	s05_16955234	5	16955234	Arbelaez et al. 2019
1069	chr5_17017106	s05_17017106	5	17017106	Arbelaez et al. 2019
1077	chr5_18108765	s05_18108765	5	18108765	Arbelaez et al. 2019
1078	chr5_18405433	s05_18405433	5	18405433	Arbelaez et al. 2019
1081	chr5_18816269	s05_18816269	5	18816269	Arbelaez et al. 2019
1084	chr5_19098650	s05_19098650	5	19098650	Arbelaez et al. 2019
1085	chr5_19155333	s05_19155333	5	19155333	Arbelaez et al. 2019
1088	chr5_19516545	s05_19516545	5	19516545	Arbelaez et al. 2019
1090	chr5_19723342	s05_19723342	5	19723342	Arbelaez et al. 2019
1092	chr5_19974373	s05_19974373	5	19974373	Arbelaez et al. 2019
964	chr5_201193	s05_201193	5	201193	Arbelaez et al. 2019
1093	chr5_20331215	s05_20331215	5	20331215	Arbelaez et al. 2019
1095	chr5_20551103	s05_20551103	5	20551103	Arbelaez et al. 2019
1099	chr5_21494622	s05_21494622	5	21494622	Arbelaez et al. 2019
1103	chr5_22075948	s05_22075948	5	22075948	Arbelaez et al. 2019
1105	chr5_22295097	s05_22295097	5	22295097	Arbelaez et al. 2019
1107	chr5_22711811	s05_22711811	5	22711811	Arbelaez et al. 2019
980	chr5_2291156	s05_2291156	5	2291156	Arbelaez et al. 2019
1109	chr5_23143060	s05_23143060	5	23143060	Arbelaez et al. 2019
1111	chr5_23661597	s05_23661597	5	23661597	Arbelaez et al. 2019
1114	chr5_23824618	s05_23824618	5	23824618	Arbelaez et al. 2019
1117	chr5_24090514	s05_24090514	5	24090514	Arbelaez et al. 2019
1123	chr5_25234430	s05_25234430	5	25234430	Arbelaez et al. 2019
983	chr5_2525289	s05_2525289	5	2525289	Arbelaez et al. 2019
1128	chr5_26185802	s05_26185802	5	26185802	Arbelaez et al. 2019
1132	chr5_27086886	s05_27086886	5	27086886	Arbelaez et al. 2019
1133	chr5_27289052	s05_27289052	5	27289052	Arbelaez et al. 2019
1134	chr5_27531788	s05_27531788	5	27531788	Arbelaez et al. 2019
1135	chr5_27627633	s05_27627633	5	27627633	Arbelaez et al. 2019
1138	chr5_27899049	s05_27899049	5	27899049	Arbelaez et al. 2019
1140	chr5_28101376	s05_28101376	5	28101376	Arbelaez et al. 2019
1141	chr5_28344771	s05_28344771	5	28344771	Arbelaez et al. 2019
1144	chr5_28642522	s05_28642522	5	28642522	Arbelaez et al. 2019
1146	chr5_28772543	s05_28772543	5	28772543	Arbelaez et al. 2019
987	chr5_2889262	s05_2889262	5	2889262	Arbelaez et al. 2019
1150	chr5_29061672	s05_29061672	5	29061672	Arbelaez et al. 2019
1151	chr5_29100308	s05_29100308	5	29100308	Arbelaez et al. 2019
1153	chr5_29490231	s05_29490231	5	29490231	Arbelaez et al. 2019
989	chr5_3092113	s05_3092113	5	3092113	Arbelaez et al. 2019
993	chr5_3470087	s05_3470087	5	3470087	Arbelaez et al. 2019
994	chr5_3817643	s05_3817643	5	3817643	Arbelaez et al. 2019
996	chr5_4205413	s05_4205413	5	4205413	Arbelaez et al. 2019
967	chr5_440644	s05_440644	5	440644	Arbelaez et al. 2019
963	chr5_44806	s05_44806	5	44806	Arbelaez et al. 2019
997	chr5_4589783	s05_4589783	5	4589783	Arbelaez et al. 2019
1001	chr5_4819475	s05_4819475	5	4819475	Arbelaez et al. 2019
1002	chr5_4953754	s05_4953754	5	4953754	Arbelaez et al. 2019
1018	chr5_6129755	s05_6129755	5	6129755	Arbelaez et al. 2019
1019	chr5_6544781	s05_6544781	5	6544781	Arbelaez et al. 2019
1021	chr5_6607675	s05_6607675	5	6607675	Arbelaez et al. 2019
971	chr5_661832	s05_661832	5	661832	Arbelaez et al. 2019
1024	chr5_6833061	s05_6833061	5	6833061	Arbelaez et al. 2019
1027	chr5_7195992	s05_7195992	5	7195992	Arbelaez et al. 2019
1028	chr5_7328783	s05_7328783	5	7328783	Arbelaez et al. 2019
1031	chr5_7706179	s05_7706179	5	7706179	Arbelaez et al. 2019
1034	chr5_8080666	s05_8080666	5	8080666	Arbelaez et al. 2019
1035	chr5_8384781	s05_8384781	5	8384781	Arbelaez et al. 2019
1037	chr5_8585466	s05_8585466	5	8585466	Arbelaez et al. 2019
972	chr5_922530	s05_922530	5	922530	Arbelaez et al. 2019
1041	chr5_9712988	s05_9712988	5	9712988	Arbelaez et al. 2019
1270	chr6_10006906	s06_10006906	6	10006906	Arbelaez et al. 2019
1278	chr6_10966744	s06_10966744	6	10966744	Arbelaez et al. 2019
1279	chr6_11131403	s06_11131403	6	11131403	Arbelaez et al. 2019
1281	chr6_11692013	s06_11692013	6	11692013	Arbelaez et al. 2019
1172	chr6_1272777	s06_1272777	6	1272777	Arbelaez et al. 2019
1288	chr6_12989252	s06_12989252	6	12989252	Arbelaez et al. 2019
1292	chr6_13702743	s06_13702743	6	13702743	Arbelaez et al. 2019
1175	chr6_1378891	s06_1378891	6	1378891	Arbelaez et al. 2019
1295	chr6_14006726	s06_14006726	6	14006726	Arbelaez et al. 2019
1297	chr6_14504992	s06_14504992	6	14504992	Arbelaez et al. 2019
1179	chr6_1521855	s06_1521855	6	1521855	Arbelaez et al. 2019
1301	chr6_15358704	s06_15358704	6	15358704	Arbelaez et al. 2019
1305	chr6_16304717	s06_16304717	6	16304717	Arbelaez et al. 2019
1312	chr6_16806254	s06_16806254	6	16806254	Arbelaez et al. 2019
1315	chr6_17076390	s06_17076390	6	17076390	Arbelaez et al. 2019
1318	chr6_17698448	s06_17698448	6	17698448	Arbelaez et al. 2019
1325	chr6_19462276	s06_19462276	6	19462276	Arbelaez et al. 2019
1328	chr6_19989362	s06_19989362	6	19989362	Arbelaez et al. 2019
1190	chr6_2025629	s06_2025629	6	2025629	Arbelaez et al. 2019
1330	chr6_20462203	s06_20462203	6	20462203	Arbelaez et al. 2019
1335	chr6_21246829	s06_21246829	6	21246829	Arbelaez et al. 2019
1336	chr6_21491695	s06_21491695	6	21491695	Arbelaez et al. 2019
1340	chr6_21818860	s06_21818860	6	21818860	Arbelaez et al. 2019
1344	chr6_22371041	s06_22371041	6	22371041	Arbelaez et al. 2019
1352	chr6_24003856	s06_24003856	6	24003856	Arbelaez et al. 2019
1353	chr6_24219798	s06_24219798	6	24219798	Arbelaez et al. 2019
1192	chr6_2430760	s06_2430760	6	2430760	Arbelaez et al. 2019
1355	chr6_24331932	s06_24331932	6	24331932	Arbelaez et al. 2019
1156	chr6_244274	s06_244274	6	244274	Arbelaez et al. 2019
1356	chr6_24502000	s06_24502000	6	24502000	Arbelaez et al. 2019
1361	chr6_25277863	s06_25277863	6	25277863	Arbelaez et al. 2019
1194	chr6_2535102	s06_2535102	6	2535102	Arbelaez et al. 2019
1363	chr6_25434460	s06_25434460	6	25434460	Arbelaez et al. 2019
1365	chr6_26139965	s06_26139965	6	26139965	Arbelaez et al. 2019
1367	chr6_26513610	s06_26513610	6	26513610	Arbelaez et al. 2019
1371	chr6_27275515	s06_27275515	6	27275515	Arbelaez et al. 2019
1373	chr6_27364485	s06_27364485	6	27364485	Arbelaez et al. 2019
1382	chr6_27761109	s06_27761109	6	27761109	Arbelaez et al. 2019
1197	chr6_2783620	s06_2783620	6	2783620	Arbelaez et al. 2019
1198	chr6_2808467	s06_2808467	6	2808467	Arbelaez et al. 2019
1383	chr6_28100960	s06_28100960	6	28100960	Arbelaez et al. 2019
1386	chr6_28201282	s06_28201282	6	28201282	Arbelaez et al. 2019
1387	chr6_28723997	s06_28723997	6	28723997	Arbelaez et al. 2019
1397	chr6_29416997	s06_29416997	6	29416997	Arbelaez et al. 2019
1398	chr6_29648332	s06_29648332	6	29648332	Arbelaez et al. 2019
1200	chr6_3140863	s06_3140863	6	3140863	Arbelaez et al. 2019
1201	chr6_3244503	s06_3244503	6	3244503	Arbelaez et al. 2019
1206	chr6_3431721	s06_3431721	6	3431721	Arbelaez et al. 2019
1209	chr6_3598843	s06_3598843	6	3598843	Arbelaez et al. 2019
1210	chr6_3632725	s06_3632725	6	3632725	Arbelaez et al. 2019
1211	chr6_3721346	s06_3721346	6	3721346	Arbelaez et al. 2019
1213	chr6_3951547	s06_3951547	6	3951547	Arbelaez et al. 2019
1159	chr6_400753	s06_400753	6	400753	Arbelaez et al. 2019
1216	chr6_4076903	s06_4076903	6	4076903	Arbelaez et al. 2019
1219	chr6_4641044	s06_4641044	6	4641044	Arbelaez et al. 2019
1222	chr6_4757948	s06_4757948	6	4757948	Arbelaez et al. 2019
1225	chr6_4887859	s06_4887859	6	4887859	Arbelaez et al. 2019
1230	chr6_5195334	s06_5195334	6	5195334	Arbelaez et al. 2019
1234	chr6_5707236	s06_5707236	6	5707236	Arbelaez et al. 2019
1238	chr6_6093491	s06_6093491	6	6093491	Arbelaez et al. 2019
1163	chr6_646915	s06_646915	6	646915	Arbelaez et al. 2019
1240	chr6_6508525	s06_6508525	6	6508525	Arbelaez et al. 2019
1166	chr6_677288	s06_677288	6	677288	Arbelaez et al. 2019
1250	chr6_7629011	s06_7629011	6	7629011	Arbelaez et al. 2019
1255	chr6_8153078	s06_8153078	6	8153078	Arbelaez et al. 2019
1257	chr6_8405025	s06_8405025	6	8405025	Arbelaez et al. 2019
1262	chr6_9222038	s06_9222038	6	9222038	Arbelaez et al. 2019
1269	chr6_9836381	s06_9836381	6	9836381	Arbelaez et al. 2019
1414	chr7_1058718	s07_1058718	7	1058718	Arbelaez et al. 2019
1466	chr7_11290725	s07_11290725	7	11290725	Arbelaez et al. 2019
1416	chr7_1195861	s07_1195861	7	1195861	Arbelaez et al. 2019
1417	chr7_1317761	s07_1317761	7	1317761	Arbelaez et al. 2019
1419	chr7_1432567	s07_1432567	7	1432567	Arbelaez et al. 2019
1478	chr7_14729119	s07_14729119	7	14729119	Arbelaez et al. 2019
1481	chr7_15340454	s07_15340454	7	15340454	Arbelaez et al. 2019
1420	chr7_1558687	s07_1558687	7	1558687	Arbelaez et al. 2019
1487	chr7_16313631	s07_16313631	7	16313631	Arbelaez et al. 2019
1493	chr7_17654305	s07_17654305	7	17654305	Arbelaez et al. 2019
1495	chr7_17877865	s07_17877865	7	17877865	Arbelaez et al. 2019
1499	chr7_18208798	s07_18208798	7	18208798	Arbelaez et al. 2019
1405	chr7_184193	s07_184193	7	184193	Arbelaez et al. 2019
1422	chr7_1865306	s07_1865306	7	1865306	Arbelaez et al. 2019
1501	chr7_18689329	s07_18689329	7	18689329	Arbelaez et al. 2019
1503	chr7_18895399	s07_18895399	7	18895399	Arbelaez et al. 2019
1510	chr7_20514892	s07_20514892	7	20514892	Arbelaez et al. 2019
1513	chr7_20809098	s07_20809098	7	20809098	Arbelaez et al. 2019
1516	chr7_21135004	s07_21135004	7	21135004	Arbelaez et al. 2019
1425	chr7_2128881	s07_2128881	7	2128881	Arbelaez et al. 2019
1522	chr7_21539524	s07_21539524	7	21539524	Arbelaez et al. 2019
1524	chr7_21848848	s07_21848848	7	21848848	Arbelaez et al. 2019
1528	chr7_22277144	s07_22277144	7	22277144	Arbelaez et al. 2019
1532	chr7_22811363	s07_22811363	7	22811363	Arbelaez et al. 2019
1533	chr7_23087994	s07_23087994	7	23087994	Arbelaez et al. 2019
1427	chr7_2331583	s07_2331583	7	2331583	Arbelaez et al. 2019
1535	chr7_23535052	s07_23535052	7	23535052	Arbelaez et al. 2019
1536	chr7_23785728	s07_23785728	7	23785728	Arbelaez et al. 2019
1538	chr7_24026475	s07_24026475	7	24026475	Arbelaez et al. 2019
1540	chr7_24313817	s07_24313817	7	24313817	Arbelaez et al. 2019
1541	chr7_24507157	s07_24507157	7	24507157	Arbelaez et al. 2019
1543	chr7_24636588	s07_24636588	7	24636588	Arbelaez et al. 2019
1552	chr7_25339609	s07_25339609	7	25339609	Arbelaez et al. 2019
1557	chr7_25935801	s07_25935801	7	25935801	Arbelaez et al. 2019
1562	chr7_27021585	s07_27021585	7	27021585	Arbelaez et al. 2019
1564	chr7_27883987	s07_27883987	7	27883987	Arbelaez et al. 2019
1567	chr7_28187994	s07_28187994	7	28187994	Arbelaez et al. 2019
1570	chr7_28409912	s07_28409912	7	28409912	Arbelaez et al. 2019
1571	chr7_29062014	s07_29062014	7	29062014	Arbelaez et al. 2019
1435	chr7_3616857	s07_3616857	7	3616857	Arbelaez et al. 2019
1409	chr7_514293	s07_514293	7	514293	Arbelaez et al. 2019
1443	chr7_5442983	s07_5442983	7	5442983	Arbelaez et al. 2019
1444	chr7_5729056	s07_5729056	7	5729056	Arbelaez et al. 2019
1447	chr7_6029723	s07_6029723	7	6029723	Arbelaez et al. 2019
1451	chr7_7317122	s07_7317122	7	7317122	Arbelaez et al. 2019
1410	chr7_770090	s07_770090	7	770090	Arbelaez et al. 2019
1454	chr7_8140854	s07_8140854	7	8140854	Arbelaez et al. 2019
1455	chr7_8320872	s07_8320872	7	8320872	Arbelaez et al. 2019
1456	chr7_8487862	s07_8487862	7	8487862	Arbelaez et al. 2019
1413	chr7_940832	s07_940832	7	940832	Arbelaez et al. 2019
1657	chr8_10105233	s08_10105233	8	10105233	Arbelaez et al. 2019
1658	chr8_10188041	s08_10188041	8	10188041	Arbelaez et al. 2019
1582	chr8_1088007	s08_1088007	8	1088007	Arbelaez et al. 2019
1666	chr8_11248949	s08_11248949	8	11248949	Arbelaez et al. 2019
1668	chr8_11370680	s08_11370680	8	11370680	Arbelaez et al. 2019
1670	chr8_11565636	s08_11565636	8	11565636	Arbelaez et al. 2019
1673	chr8_11727432	s08_11727432	8	11727432	Arbelaez et al. 2019
1675	chr8_11888511	s08_11888511	8	11888511	Arbelaez et al. 2019
1583	chr8_1198055	s08_1198055	8	1198055	Arbelaez et al. 2019
1677	chr8_12145970	s08_12145970	8	12145970	Arbelaez et al. 2019
1679	chr8_12421145	s08_12421145	8	12421145	Arbelaez et al. 2019
1681	chr8_12723619	s08_12723619	8	12723619	Arbelaez et al. 2019
1684	chr8_13017690	s08_13017690	8	13017690	Arbelaez et al. 2019
1686	chr8_13354771	s08_13354771	8	13354771	Arbelaez et al. 2019
1688	chr8_13741571	s08_13741571	8	13741571	Arbelaez et al. 2019
1691	chr8_14184612	s08_14184612	8	14184612	Arbelaez et al. 2019
1696	chr8_14676962	s08_14676962	8	14676962	Arbelaez et al. 2019
1698	chr8_14799421	s08_14799421	8	14799421	Arbelaez et al. 2019
1700	chr8_14986111	s08_14986111	8	14986111	Arbelaez et al. 2019
1704	chr8_15439243	s08_15439243	8	15439243	Arbelaez et al. 2019
1706	chr8_15666434	s08_15666434	8	15666434	Arbelaez et al. 2019
1712	chr8_16618829	s08_16618829	8	16618829	Arbelaez et al. 2019
1715	chr8_17319167	s08_17319167	8	17319167	Arbelaez et al. 2019
1719	chr8_17618902	s08_17618902	8	17618902	Arbelaez et al. 2019
1726	chr8_18108496	s08_18108496	8	18108496	Arbelaez et al. 2019
1727	chr8_18221884	s08_18221884	8	18221884	Arbelaez et al. 2019
1587	chr8_1836529	s08_1836529	8	1836529	Arbelaez et al. 2019
1729	chr8_18552226	s08_18552226	8	18552226	Arbelaez et al. 2019
1730	chr8_18585825	s08_18585825	8	18585825	Arbelaez et al. 2019
1731	chr8_18719247	s08_18719247	8	18719247	Arbelaez et al. 2019
1737	chr8_19351882	s08_19351882	8	19351882	Arbelaez et al. 2019
1741	chr8_19833397	s08_19833397	8	19833397	Arbelaez et al. 2019
1743	chr8_20053642	s08_20053642	8	20053642	Arbelaez et al. 2019
1749	chr8_21011651	s08_21011651	8	21011651	Arbelaez et al. 2019
1751	chr8_21253397	s08_21253397	8	21253397	Arbelaez et al. 2019
1574	chr8_213580	s08_213580	8	213580	Arbelaez et al. 2019
1754	chr8_21667240	s08_21667240	8	21667240	Arbelaez et al. 2019
1589	chr8_2208785	s08_2208785	8	2208785	Arbelaez et al. 2019
1756	chr8_22252502	s08_22252502	8	22252502	Arbelaez et al. 2019
1757	chr8_22776414	s08_22776414	8	22776414	Arbelaez et al. 2019
1760	chr8_23713744	s08_23713744	8	23713744	Arbelaez et al. 2019
1762	chr8_24205833	s08_24205833	8	24205833	Arbelaez et al. 2019
1763	chr8_24753844	s08_24753844	8	24753844	Arbelaez et al. 2019
1764	chr8_24903648	s08_24903648	8	24903648	Arbelaez et al. 2019
1765	chr8_25157676	s08_25157676	8	25157676	Arbelaez et al. 2019
1771	chr8_25467581	s08_25467581	8	25467581	Arbelaez et al. 2019
1772	chr8_25757847	s08_25757847	8	25757847	Arbelaez et al. 2019
1592	chr8_2673447	s08_2673447	8	2673447	Arbelaez et al. 2019
1783	chr8_27039158	s08_27039158	8	27039158	Arbelaez et al. 2019
1785	chr8_27282645	s08_27282645	8	27282645	Arbelaez et al. 2019
1787	chr8_27563586	s08_27563586	8	27563586	Arbelaez et al. 2019
1791	chr8_28125942	s08_28125942	8	28125942	Arbelaez et al. 2019
1595	chr8_3212821	s08_3212821	8	3212821	Arbelaez et al. 2019
1598	chr8_3365127	s08_3365127	8	3365127	Arbelaez et al. 2019
1600	chr8_3682006	s08_3682006	8	3682006	Arbelaez et al. 2019
1603	chr8_3866523	s08_3866523	8	3866523	Arbelaez et al. 2019
1607	chr8_4190544	s08_4190544	8	4190544	Arbelaez et al. 2019
1608	chr8_4511882	s08_4511882	8	4511882	Arbelaez et al. 2019
1612	chr8_4853081	s08_4853081	8	4853081	Arbelaez et al. 2019
1613	chr8_5082883	s08_5082883	8	5082883	Arbelaez et al. 2019
1576	chr8_528441	s08_528441	8	528441	Arbelaez et al. 2019
1620	chr8_5394572	s08_5394572	8	5394572	Arbelaez et al. 2019
1623	chr8_5634800	s08_5634800	8	5634800	Arbelaez et al. 2019
1630	chr8_6269190	s08_6269190	8	6269190	Arbelaez et al. 2019
1577	chr8_658032	s08_658032	8	658032	Arbelaez et al. 2019
1635	chr8_7549599	s08_7549599	8	7549599	Arbelaez et al. 2019
1642	chr8_7854002	s08_7854002	8	7854002	Arbelaez et al. 2019
1579	chr8_811201	s08_811201	8	811201	Arbelaez et al. 2019
1644	chr8_8386031	s08_8386031	8	8386031	Arbelaez et al. 2019
1646	chr8_8580913	s08_8580913	8	8580913	Arbelaez et al. 2019
1647	chr8_8703041	s08_8703041	8	8703041	Arbelaez et al. 2019
1650	chr8_8897653	s08_8897653	8	8897653	Arbelaez et al. 2019
1653	chr8_9400516	s08_9400516	8	9400516	Arbelaez et al. 2019
1656	chr8_9769758	s08_9769758	8	9769758	Arbelaez et al. 2019
1857	chr9_10119114	s09_10119114	9	10119114	Arbelaez et al. 2019
1859	chr9_10324014	s09_10324014	9	10324014	Arbelaez et al. 2019
1861	chr9_10757351	s09_10757351	9	10757351	Arbelaez et al. 2019
1863	chr9_10934233	s09_10934233	9	10934233	Arbelaez et al. 2019
1798	chr9_1098249	s09_1098249	9	1098249	Arbelaez et al. 2019
1864	chr9_11237877	s09_11237877	9	11237877	Arbelaez et al. 2019
1871	chr9_11746684	s09_11746684	9	11746684	Arbelaez et al. 2019
1874	chr9_11848827	s09_11848827	9	11848827	Arbelaez et al. 2019
1875	chr9_11871485	s09_11871485	9	11871485	Arbelaez et al. 2019
1876	chr9_12029697	s09_12029697	9	12029697	Arbelaez et al. 2019
1879	chr9_12326525	s09_12326525	9	12326525	Arbelaez et al. 2019
1800	chr9_1467951	s09_1467951	9	1467951	Arbelaez et al. 2019
1792	chr9_148594	s09_148594	9	148594	Arbelaez et al. 2019
1898	chr9_14920092	s09_14920092	9	14920092	Arbelaez et al. 2019
1901	chr9_15322775	s09_15322775	9	15322775	Arbelaez et al. 2019
1902	chr9_15429734	s09_15429734	9	15429734	Arbelaez et al. 2019
1908	chr9_16616509	s09_16616509	9	16616509	Arbelaez et al. 2019
1910	chr9_17213519	s09_17213519	9	17213519	Arbelaez et al. 2019
1912	chr9_17447522	s09_17447522	9	17447522	Arbelaez et al. 2019
1915	chr9_17707080	s09_17707080	9	17707080	Arbelaez et al. 2019
1923	chr9_19322095	s09_19322095	9	19322095	Arbelaez et al. 2019
1925	chr9_19683788	s09_19683788	9	19683788	Arbelaez et al. 2019
1928	chr9_20138174	s09_20138174	9	20138174	Arbelaez et al. 2019
1931	chr9_20682114	s09_20682114	9	20682114	Arbelaez et al. 2019
1935	chr9_21148430	s09_21148430	9	21148430	Arbelaez et al. 2019
1938	chr9_21348882	s09_21348882	9	21348882	Arbelaez et al. 2019
1941	chr9_21612758	s09_21612758	9	21612758	Arbelaez et al. 2019
1942	chr9_21667022	s09_21667022	9	21667022	Arbelaez et al. 2019
1944	chr9_21885499	s09_21885499	9	21885499	Arbelaez et al. 2019
1945	chr9_21896910	s09_21896910	9	21896910	Arbelaez et al. 2019
1946	chr9_22076185	s09_22076185	9	22076185	Arbelaez et al. 2019
1802	chr9_2298381	s09_2298381	9	2298381	Arbelaez et al. 2019
1804	chr9_2380203	s09_2380203	9	2380203	Arbelaez et al. 2019
1806	chr9_2930321	s09_2930321	9	2930321	Arbelaez et al. 2019
1807	chr9_3357568	s09_3357568	9	3357568	Arbelaez et al. 2019
1808	chr9_3603443	s09_3603443	9	3603443	Arbelaez et al. 2019
1812	chr9_3934768	s09_3934768	9	3934768	Arbelaez et al. 2019
1814	chr9_4136552	s09_4136552	9	4136552	Arbelaez et al. 2019
1817	chr9_4650293	s09_4650293	9	4650293	Arbelaez et al. 2019
1795	chr9_496013	s09_496013	9	496013	Arbelaez et al. 2019
1822	chr9_5008706	s09_5008706	9	5008706	Arbelaez et al. 2019
1825	chr9_5305969	s09_5305969	9	5305969	Arbelaez et al. 2019
1827	chr9_5812738	s09_5812738	9	5812738	Arbelaez et al. 2019
1796	chr9_591085	s09_591085	9	591085	Arbelaez et al. 2019
1830	chr9_6093984	s09_6093984	9	6093984	Arbelaez et al. 2019
1832	chr9_6360984	s09_6360984	9	6360984	Arbelaez et al. 2019
1835	chr9_6774928	s09_6774928	9	6774928	Arbelaez et al. 2019
1836	chr9_6796269	s09_6796269	9	6796269	Arbelaez et al. 2019
1839	chr9_7116276	s09_7116276	9	7116276	Arbelaez et al. 2019
1840	chr9_7280339	s09_7280339	9	7280339	Arbelaez et al. 2019
1843	chr9_8043218	s09_8043218	9	8043218	Arbelaez et al. 2019
1846	chr9_8851945	s09_8851945	9	8851945	Arbelaez et al. 2019
1849	chr9_9252104	s09_9252104	9	9252104	Arbelaez et al. 2019
1851	chr9_9626056	s09_9626056	9	9626056	Arbelaez et al. 2019
1853	chr9_9784212	s09_9784212	9	9784212	Arbelaez et al. 2019
1856	chr9_9945591	s09_9945591	9	9945591	Arbelaez et al. 2019
2021	chr10_10293012	s10_10293012	10	10293012	Arbelaez et al. 2019
2022	chr10_10476379	s10_10476379	10	10476379	Arbelaez et al. 2019
2024	chr10_10755400	s10_10755400	10	10755400	Arbelaez et al. 2019
2026	chr10_11087428	s10_11087428	10	11087428	Arbelaez et al. 2019
2027	chr10_11195773	s10_11195773	10	11195773	Arbelaez et al. 2019
2029	chr10_11664750	s10_11664750	10	11664750	Arbelaez et al. 2019
2030	chr10_11918679	s10_11918679	10	11918679	Arbelaez et al. 2019
2032	chr10_12145295	s10_12145295	10	12145295	Arbelaez et al. 2019
2033	chr10_12658334	s10_12658334	10	12658334	Arbelaez et al. 2019
2034	chr10_12780901	s10_12780901	10	12780901	Arbelaez et al. 2019
2037	chr10_13551338	s10_13551338	10	13551338	Arbelaez et al. 2019
2039	chr10_13778768	s10_13778768	10	13778768	Arbelaez et al. 2019
2044	chr10_14640458	s10_14640458	10	14640458	Arbelaez et al. 2019
1950	chr10_146531	s10_146531	10	146531	Arbelaez et al. 2019
2045	chr10_14777004	s10_14777004	10	14777004	Arbelaez et al. 2019
1956	chr10_1562931	s10_1562931	10	1562931	Arbelaez et al. 2019
2049	chr10_15824876	s10_15824876	10	15824876	Arbelaez et al. 2019
2052	chr10_16229530	s10_16229530	10	16229530	Arbelaez et al. 2019
2054	chr10_16742656	s10_16742656	10	16742656	Arbelaez et al. 2019
2061	chr10_17397576	s10_17397576	10	17397576	Arbelaez et al. 2019
2067	chr10_18098744	s10_18098744	10	18098744	Arbelaez et al. 2019
2069	chr10_18302926	s10_18302926	10	18302926	Arbelaez et al. 2019
2072	chr10_18583084	s10_18583084	10	18583084	Arbelaez et al. 2019
1959	chr10_1873548	s10_1873548	10	1873548	Arbelaez et al. 2019
2074	chr10_18852690	s10_18852690	10	18852690	Arbelaez et al. 2019
2076	chr10_19025553	s10_19025553	10	19025553	Arbelaez et al. 2019
2079	chr10_19217152	s10_19217152	10	19217152	Arbelaez et al. 2019
2080	chr10_19378143	s10_19378143	10	19378143	Arbelaez et al. 2019
2081	chr10_19421322	s10_19421322	10	19421322	Arbelaez et al. 2019
2085	chr10_19678268	s10_19678268	10	19678268	Arbelaez et al. 2019
2086	chr10_19899160	s10_19899160	10	19899160	Arbelaez et al. 2019
2087	chr10_20272810	s10_20272810	10	20272810	Arbelaez et al. 2019
2089	chr10_20723502	s10_20723502	10	20723502	Arbelaez et al. 2019
1962	chr10_2129424	s10_2129424	10	2129424	Arbelaez et al. 2019
2095	chr10_21338558	s10_21338558	10	21338558	Arbelaez et al. 2019
2097	chr10_21596449	s10_21596449	10	21596449	Arbelaez et al. 2019
1965	chr10_2258418	s10_2258418	10	2258418	Arbelaez et al. 2019
2106	chr10_22979577	s10_22979577	10	22979577	Arbelaez et al. 2019
1975	chr10_3358419	s10_3358419	10	3358419	Arbelaez et al. 2019
1977	chr10_3400212	s10_3400212	10	3400212	Arbelaez et al. 2019
1984	chr10_4281052	s10_4281052	10	4281052	Arbelaez et al. 2019
1991	chr10_5257224	s10_5257224	10	5257224	Arbelaez et al. 2019
1992	chr10_5488256	s10_5488256	10	5488256	Arbelaez et al. 2019
1994	chr10_5826161	s10_5826161	10	5826161	Arbelaez et al. 2019
1999	chr10_6648158	s10_6648158	10	6648158	Arbelaez et al. 2019
2001	chr10_6798684	s10_6798684	10	6798684	Arbelaez et al. 2019
2002	chr10_7120214	s10_7120214	10	7120214	Arbelaez et al. 2019
2003	chr10_7397104	s10_7397104	10	7397104	Arbelaez et al. 2019
2006	chr10_7530092	s10_7530092	10	7530092	Arbelaez et al. 2019
1953	chr10_790044	s10_790044	10	790044	Arbelaez et al. 2019
2010	chr10_8404652	s10_8404652	10	8404652	Arbelaez et al. 2019
2011	chr10_8795028	s10_8795028	10	8795028	Arbelaez et al. 2019
2014	chr10_9095431	s10_9095431	10	9095431	Arbelaez et al. 2019
2184	chr11_10741559	s11_10741559	11	10741559	Arbelaez et al. 2019
2188	chr11_11600170	s11_11600170	11	11600170	Arbelaez et al. 2019
2190	chr11_11715177	s11_11715177	11	11715177	Arbelaez et al. 2019
2195	chr11_12142966	s11_12142966	11	12142966	Arbelaez et al. 2019
2197	chr11_12583306	s11_12583306	11	12583306	Arbelaez et al. 2019
2199	chr11_13020856	s11_13020856	11	13020856	Arbelaez et al. 2019
2205	chr11_13926471	s11_13926471	11	13926471	Arbelaez et al. 2019
2210	chr11_14737362	s11_14737362	11	14737362	Arbelaez et al. 2019
2215	chr11_15447862	s11_15447862	11	15447862	Arbelaez et al. 2019
2218	chr11_15638505	s11_15638505	11	15638505	Arbelaez et al. 2019
2219	chr11_15850522	s11_15850522	11	15850522	Arbelaez et al. 2019
2221	chr11_16284824	s11_16284824	11	16284824	Arbelaez et al. 2019
2222	chr11_16440431	s11_16440431	11	16440431	Arbelaez et al. 2019
2224	chr11_17047762	s11_17047762	11	17047762	Arbelaez et al. 2019
2228	chr11_17292835	s11_17292835	11	17292835	Arbelaez et al. 2019
2229	chr11_17489208	s11_17489208	11	17489208	Arbelaez et al. 2019
2231	chr11_17697337	s11_17697337	11	17697337	Arbelaez et al. 2019
2233	chr11_17908099	s11_17908099	11	17908099	Arbelaez et al. 2019
2236	chr11_18290104	s11_18290104	11	18290104	Arbelaez et al. 2019
2239	chr11_18483298	s11_18483298	11	18483298	Arbelaez et al. 2019
2244	chr11_18936070	s11_18936070	11	18936070	Arbelaez et al. 2019
2245	chr11_18993024	s11_18993024	11	18993024	Arbelaez et al. 2019
2252	chr11_19648542	s11_19648542	11	19648542	Arbelaez et al. 2019
2255	chr11_19898835	s11_19898835	11	19898835	Arbelaez et al. 2019
2257	chr11_20074439	s11_20074439	11	20074439	Arbelaez et al. 2019
2261	chr11_20353609	s11_20353609	11	20353609	Arbelaez et al. 2019
2266	chr11_20647651	s11_20647651	11	20647651	Arbelaez et al. 2019
2281	chr11_21446099	s11_21446099	11	21446099	Arbelaez et al. 2019
2283	chr11_21689303	s11_21689303	11	21689303	Arbelaez et al. 2019
2284	chr11_21691103	s11_21691103	11	21691103	Arbelaez et al. 2019
2291	chr11_22044151	s11_22044151	11	22044151	Arbelaez et al. 2019
2297	chr11_22440795	s11_22440795	11	22440795	Arbelaez et al. 2019
2302	chr11_22562351	s11_22562351	11	22562351	Arbelaez et al. 2019
2307	chr11_22912310	s11_22912310	11	22912310	Arbelaez et al. 2019
2308	chr11_23023708	s11_23023708	11	23023708	Arbelaez et al. 2019
2309	chr11_23080452	s11_23080452	11	23080452	Arbelaez et al. 2019
2310	chr11_23083051	s11_23083051	11	23083051	Arbelaez et al. 2019
2120	chr11_2393690	s11_2393690	11	2393690	Arbelaez et al. 2019
2324	chr11_24100905	s11_24100905	11	24100905	Arbelaez et al. 2019
2328	chr11_24585862	s11_24585862	11	24585862	Arbelaez et al. 2019
2332	chr11_25135188	s11_25135188	11	25135188	Arbelaez et al. 2019
2333	chr11_25279481	s11_25279481	11	25279481	Arbelaez et al. 2019
2336	chr11_25432067	s11_25432067	11	25432067	Arbelaez et al. 2019
2339	chr11_25562299	s11_25562299	11	25562299	Arbelaez et al. 2019
2341	chr11_25811598	s11_25811598	11	25811598	Arbelaez et al. 2019
2357	chr11_27817978	s11_27817978	11	27817978	Arbelaez et al. 2019
2365	chr11_27994133	s11_27994133	11	27994133	Arbelaez et al. 2019
2125	chr11_2875870	s11_2875870	11	2875870	Arbelaez et al. 2019
2380	chr11_28966693	s11_28966693	11	28966693	Arbelaez et al. 2019
2130	chr11_3802930	s11_3802930	11	3802930	Arbelaez et al. 2019
2135	chr11_4783262	s11_4783262	11	4783262	Arbelaez et al. 2019
2145	chr11_5615885	s11_5615885	11	5615885	Arbelaez et al. 2019
2150	chr11_6088667	s11_6088667	11	6088667	Arbelaez et al. 2019
[truncated: 567 more rows]

## Sheet: Sheet3
Table S1. List of SNP markers included in the target capture panel developed in this study.
No.	marker name (target capture panel)	marker name (original)		chromosome	position (bp)	Reference
1	chr1_194844	s01_194844		1	194844	Arbelaez et al. 2019
2	chr1_375814	s01_375814		1	375814	Arbelaez et al. 2019
3	chr1_717702	s01_717702		1	717702	Arbelaez et al. 2019
4	chr1_728809	KJ01_001		1	728809	Cheon et al. 2018
5	chr1_858021	KGH01_001		1	858021	Cheon et al. 2020
6	chr1_932866	s01_932866		1	932866	Arbelaez et al. 2019
7	chr1_1044946	s01_1044946		1	1044946	Arbelaez et al. 2019
8	chr1_1050097	SK01_1050097		1	1050097	Yang et al. 2019
9	chr1_1175585	SK01_1175585		1	1175585	Yang et al. 2019
10	chr1_1360285	KJ01_002		1	1360285	Cheon et al. 2019
11	chr1_1410467	s01_1410467		1	1410467	Arbelaez et al. 2019
12	chr1_1532281	s01_1532281		1	1532281	Arbelaez et al. 2019
13	chr1_1625482	SK01_1625482		1	1625482	Yang et al. 2019
14	chr1_2072665	KGH01_003		1	2072665	Cheon et al. 2020
15	chr1_2100471	s01_2100471		1	2100471	Arbelaez et al. 2019
16	chr1_2103204	KJ01_005		1	2103204	Cheon et al. 2018
17	chr1_2277961	s01_2277961		1	2277961	Arbelaez et al. 2019
18	chr1_2287476	SK01_2287476		1	2287476	Yang et al. 2019
19	chr1_2363715	KGH01_004		1	2363715	Cheon et al. 2020
20	chr1_2416981	KJ01_007		1	2416981	Cheon et al. 2018
21	chr1_2532252	s01_2532252		1	2532252	Arbelaez et al. 2019
22	chr1_2637005	KGH01_005		1	2637005	Cheon et al. 2020
23	chr1_2726468	SK01_2726468		1	2726468	Yang et al. 2019
24	chr1_2743020	KGH01_006		1	2743020	Cheon et al. 2020
25	chr1_2865232	s01_2865232		1	2865232	Arbelaez et al. 2019
26	chr1_2871043	KJ01_009		1	2871043	Cheon et al. 2018
27	chr1_3236648	s01_3236648		1	3236648	Arbelaez et al. 2019
28	chr1_3257654	KJ01_011		1	3257654	Cheon et al. 2018
29	chr1_3523649	KJ01_013		1	3523649	Cheon et al. 2018
30	chr1_3529691	s01_3529691		1	3529691	Arbelaez et al. 2019
31	chr1_4004196	SK01_4004196		1	4004196	Yang et al. 2019
32	chr1_4167976	s01_4167976		1	4167976	Arbelaez et al. 2019
33	chr1_4209102	KJ01_015		1	4209102	Cheon et al. 2018
34	chr1_4307004	s01_4307004		1	4307004	Arbelaez et al. 2019
35	chr1_5064126	s01_5064126		1	5064126	Arbelaez et al. 2019
36	chr1_5104605	KJ01_017		1	5104605	Cheon et al. 2018
37	chr1_5264642	SK01_5264642		1	5264642	Yang et al. 2019
38	chr1_5273672	SK01_5273672		1	5273672	Yang et al. 2019
39	chr1_5282345	KJ01_018		1	5282345	Cheon et al. 2019
40	chr1_5290075	SK01_5290075		1	5290075	Yang et al. 2019
41	chr1_5317048	SK01_5317048		1	5317048	Yang et al. 2019
42	chr1_5438204	SK01_5438204		1	5438204	Yang et al. 2019
43	chr1_5442863	SK01_5442863		1	5442863	Yang et al. 2019
44	chr1_5510350	s01_5510350		1	5510350	Arbelaez et al. 2019
45	chr1_5545903	KJ01_019		1	5545903	Cheon et al. 2018
46	chr1_6090970	KJ01_020		1	6090970	Cheon et al. 2019
47	chr1_6130240	s01_6130240		1	6130240	Arbelaez et al. 2019
48	chr1_6543217	s01_6543217		1	6543217	Arbelaez et al. 2019
49	chr1_6597130	KJS01_001		1	6597130	Cheon et al. 2020
50	chr1_6802927	KJS01_002		1	6802927	Cheon et al. 2020
51	chr1_6829682	s01_6829682		1	6829682	Arbelaez et al. 2019
52	chr1_6950338	KJS01_003		1	6950338	Cheon et al. 2020
53	chr1_6962310	KJ01_021		1	6962310	Cheon et al. 2018
54	chr1_7005390	KJ01_022		1	7005390	Cheon et al. 2019
55	chr1_7027262	SK01_7027262		1	7027262	Yang et al. 2019
56	chr1_7068516	s01_7068516		1	7068516	Arbelaez et al. 2019
57	chr1_7563923	s01_7563923		1	7563923	Arbelaez et al. 2019
58	chr1_7847128	KJ01_023		1	7847128	Cheon et al. 2018
59	chr1_7854101	SK01_7854101		1	7854101	Yang et al. 2019
60	chr1_8221027	KJ01_024		1	8221027	Cheon et al. 2019
61	chr1_8245748	s01_8245748		1	8245748	Arbelaez et al. 2019
62	chr1_8509783	KJ01_025		1	8509783	Cheon et al. 2018
63	chr1_8657303	SK01_8657303		1	8657303	Yang et al. 2019
64	chr1_8709969	KJ01_026		1	8709969	Cheon et al. 2019
65	chr1_8760562	s01_8760562		1	8760562	Arbelaez et al. 2019
66	chr1_8924578	SK01_8924578		1	8924578	Yang et al. 2019
67	chr1_8959187	KJ01_027		1	8959187	Cheon et al. 2018
68	chr1_9164508	s01_9164508		1	9164508	Arbelaez et al. 2019
69	chr1_9392804	KJ01_029		1	9392804	Cheon et al. 2018
70	chr1_9423941	SK01_9423941		1	9423941	Yang et al. 2019
71	chr1_9727509	KJ01_030		1	9727509	Cheon et al. 2019
72	chr1_9880602	KJ01_031		1	9880602	Cheon et al. 2018
73	chr1_10100605	s01_10100605		1	10100605	Arbelaez et al. 2019
74	chr1_10202227	s01_10202227		1	10202227	Arbelaez et al. 2019
75	chr1_10219743	KJ01_033		1	10219743	Cheon et al. 2018
76	chr1_10438894	SK01_10438894		1	10438894	Yang et al. 2019
77	chr1_10508312	KJ01_034		1	10508312	Cheon et al. 2019
78	chr1_10645259	s01_10645259		1	10645259	Arbelaez et al. 2019
79	chr1_10747508	KJ01_035		1	10747508	Cheon et al. 2018
80	chr1_10846090	s01_10846090		1	10846090	Arbelaez et al. 2019
81	chr1_10949580	KJ01_036		1	10949580	Cheon et al. 2019
82	chr1_11209993	KJ01_037		1	11209993	Cheon et al. 2018
83	chr1_11250486	s01_11250486		1	11250486	Arbelaez et al. 2019
84	chr1_11422519	KJ01_038		1	11422519	Cheon et al. 2019
85	chr1_11459523	SK01_11459523		1	11459523	Yang et al. 2019
86	chr1_11817615	KJ01_039		1	11817615	Cheon et al. 2018
87	chr1_11845635	KJ01_040		1	11845635	Cheon et al. 2019
88	chr1_12085916	KJ01_041		1	12085916	Cheon et al. 2018
89	chr1_12216652	s01_12216652		1	12216652	Arbelaez et al. 2019
90	chr1_12335190	s01_12335190		1	12335190	Arbelaez et al. 2019
91	chr1_12941687	s01_12941687		1	12941687	Arbelaez et al. 2019
92	chr1_12947332	KJ01_043		1	12947332	Cheon et al. 2018
93	chr1_13121543	s01_13121543		1	13121543	Arbelaez et al. 2019
94	chr1_13208844	KJ01_044		1	13208844	Cheon et al. 2019
95	chr1_13245925	SK01_13245925		1	13245925	Yang et al. 2019
96	chr1_13343177	SK01_13343177		1	13343177	Yang et al. 2019
97	chr1_13442034	s01_13442034		1	13442034	Arbelaez et al. 2019
98	chr1_13519853	KJ01_045		1	13519853	Cheon et al. 2018
99	chr1_13777831	s01_13777831		1	13777831	Arbelaez et al. 2019
100	chr1_13902629	s01_13902629		1	13902629	Arbelaez et al. 2019
101	chr1_13954900	KJ01_046		1	13954900	Cheon et al. 2019
102	chr1_14249773	KJS01_004		1	14249773	Cheon et al. 2020
103	chr1_14375630	s01_14375630		1	14375630	Arbelaez et al. 2019
104	chr1_14508449	s01_14508449		1	14508449	Arbelaez et al. 2019
105	chr1_14710701	KJS01_006		1	14710701	Cheon et al. 2020
106	chr1_14937939	s01_14937939		1	14937939	Arbelaez et al. 2019
107	chr1_15013659	KJ01_049		1	15013659	Cheon et al. 2018
108	chr1_15092392	s01_15092392		1	15092392	Arbelaez et al. 2019
109	chr1_15132528	KJ01_050		1	15132528	Cheon et al. 2019
110	chr1_15337994	KJ01_051		1	15337994	Cheon et al. 2018
111	chr1_15393352	s01_15393352		1	15393352	Arbelaez et al. 2019
112	chr1_15883941	s01_15883941		1	15883941	Arbelaez et al. 2019
113	chr1_16113201	s01_16113201		1	16113201	Arbelaez et al. 2019
114	chr1_16144280	SK01_16144280		1	16144280	Yang et al. 2019
115	chr1_16284866	s01_16284866		1	16284866	Arbelaez et al. 2019
116	chr1_16596849	s01_16596849		1	16596849	Arbelaez et al. 2019
117	chr1_16677609	KJ01_055		1	16677609	Cheon et al. 2018
118	chr1_17008280	s01_17008280		1	17008280	Arbelaez et al. 2019
119	chr1_17081395	KJ01_056		1	17081395	Cheon et al. 2019
120	chr1_17219764	s01_17219764		1	17219764	Arbelaez et al. 2019
121	chr1_17387570	KJ01_057		1	17387570	Cheon et al. 2018
122	chr1_17426109	s01_17426109		1	17426109	Arbelaez et al. 2019
123	chr1_17540508	KJ01_058		1	17540508	Cheon et al. 2019
124	chr1_17540508	SK01_17540508		1	17540508	Yang et al. 2019
125	chr1_17743869	s01_17743869		1	17743869	Arbelaez et al. 2019
126	chr1_17904770	KJ01_059		1	17904770	Cheon et al. 2018
127	chr1_18102213	s01_18102213		1	18102213	Arbelaez et al. 2019
128	chr1_18332445	s01_18332445		1	18332445	Arbelaez et al. 2019
129	chr1_18501890	s01_18501890		1	18501890	Arbelaez et al. 2019
130	chr1_18537375	KGH01_008		1	18537375	Cheon et al. 2020
131	chr1_18614158	KGH01_009		1	18614158	Cheon et al. 2020
132	chr1_18639800	KGH01_010		1	18639800	Cheon et al. 2020
133	chr1_18672361	KGH01_011		1	18672361	Cheon et al. 2020
134	chr1_18801488	KJ01_061		1	18801488	Cheon et al. 2018
135	chr1_18891591	s01_18891591		1	18891591	Arbelaez et al. 2019
136	chr1_18944486	SK01_18944486		1	18944486	Yang et al. 2019
137	chr1_18999843	KJ01_062		1	18999843	Cheon et al. 2019
138	chr1_19095472	KJ01_063		1	19095472	Cheon et al. 2018
139	chr1_19269700	SK01_19269700		1	19269700	Yang et al. 2019
140	chr1_19308987	s01_19308987		1	19308987	Arbelaez et al. 2019
141	chr1_19985793	KJ01_065		1	19985793	Cheon et al. 2018
142	chr1_20022126	SK01_20022126		1	20022126	Yang et al. 2019
143	chr1_20262103	s01_20262103		1	20262103	Arbelaez et al. 2019
144	chr1_20278128	KJ01_066		1	20278128	Cheon et al. 2019
145	chr1_20418175	s01_20418175		1	20418175	Arbelaez et al. 2019
146	chr1_20488201	KJ01_067		1	20488201	Cheon et al. 2018
147	chr1_20562598	s01_20562598		1	20562598	Arbelaez et al. 2019
148	chr1_21011077	s01_21011077		1	21011077	Arbelaez et al. 2019
149	chr1_21109231	KJ01_069		1	21109231	Cheon et al. 2018
150	chr1_21361944	KJ01_071		1	21361944	Cheon et al. 2018
151	chr1_22048209	KJ01_073		1	22048209	Cheon et al. 2018
152	chr1_22328417	s01_22328417		1	22328417	Arbelaez et al. 2019
153	chr1_22359292	KJS01_009		1	22359292	Cheon et al. 2020
154	chr1_22380833	SK01_22380833		1	22380833	Yang et al. 2019
155	chr1_22453166	SK01_22453166		1	22453166	Yang et al. 2019
156	chr1_22554065	s01_22554065		1	22554065	Arbelaez et al. 2019
157	chr1_22645446	KJS01_010		1	22645446	Cheon et al. 2020
158	chr1_22829240	s01_22829240		1	22829240	Arbelaez et al. 2019
159	chr1_22955593	SK01_22955593		1	22955593	Yang et al. 2019
160	chr1_23091103	s01_23091103		1	23091103	Arbelaez et al. 2019
161	chr1_23239662	KJ01_074		1	23239662	Cheon et al. 2019
162	chr1_23240729	s01_23240729		1	23240729	Arbelaez et al. 2019
163	chr1_23434283	KJ01_075		1	23434283	Cheon et al. 2018
164	chr1_23656773	s01_23656773		1	23656773	Arbelaez et al. 2019
165	chr1_23672875	KJ01_076		1	23672875	Cheon et al. 2019
166	chr1_23750419	KGH01_012		1	23750419	Cheon et al. 2020
167	chr1_23770117	KGH01_013		1	23770117	Cheon et al. 2020
168	chr1_23788044	KGH01_014		1	23788044	Cheon et al. 2020
169	chr1_23912768	KJ01_077		1	23912768	Cheon et al. 2018
170	chr1_24018937	KGH01_015		1	24018937	Cheon et al. 2020
171	chr1_24050118	s01_24050118		1	24050118	Arbelaez et al. 2019
172	chr1_24056268	SK01_24056268		1	24056268	Yang et al. 2019
173	chr1_24334625	KGH01_016		1	24334625	Cheon et al. 2020
174	chr1_24366725	KJ01_079		1	24366725	Cheon et al. 2018
175	chr1_24391090	KGH01_017		1	24391090	Cheon et al. 2020
176	chr1_24515673	s01_24515673		1	24515673	Arbelaez et al. 2019
177	chr1_24592710	KGH01_018		1	24592710	Cheon et al. 2020
178	chr1_24722142	s01_24722142		1	24722142	Arbelaez et al. 2019
179	chr1_24741254	KJ01_080		1	24741254	Cheon et al. 2019
180	chr1_24958106	KJ01_081		1	24958106	Cheon et al. 2018
181	chr1_25148569	SK01_25148569		1	25148569	Yang et al. 2019
182	chr1_25384027	SK01_25384027		1	25384027	Yang et al. 2019
183	chr1_25548141	KJS01_013		1	25548141	Cheon et al. 2020
184	chr1_25673334	SK01_25673334		1	25673334	Yang et al. 2019
185	chr1_25906183	KJS01_015		1	25906183	Cheon et al. 2020
186	chr1_26112748	KJS01_016		1	26112748	Cheon et al. 2020
187	chr1_26187514	s01_26187514		1	26187514	Arbelaez et al. 2019
188	chr1_26493696	KJS01_018		1	26493696	Cheon et al. 2020
189	chr1_26703729	KJS01_019		1	26703729	Cheon et al. 2020
190	chr1_26880460	SK01_26880460		1	26880460	Yang et al. 2019
191	chr1_26892988	KJS01_020		1	26892988	Cheon et al. 2020
192	chr1_27046296	s01_27046296		1	27046296	Arbelaez et al. 2019
193	chr1_27055210	KJ01_082		1	27055210	Cheon et al. 2019
194	chr1_27330724	s01_27330724		1	27330724	Arbelaez et al. 2019
195	chr1_27486960	KJ01_083		1	27486960	Cheon et al. 2018
196	chr1_28117617	KJ01_084		1	28117617	Cheon et al. 2019
197	chr1_28137217	SK01_28137217		1	28137217	Yang et al. 2019
198	chr1_28142020	s01_28142020		1	28142020	Arbelaez et al. 2019
199	chr1_28478660	s01_28478660		1	28478660	Arbelaez et al. 2019
200	chr1_28826738	s01_28826738		1	28826738	Arbelaez et al. 2019
201	chr1_29047992	KGH01_019		1	29047992	Cheon et al. 2020
202	chr1_30215191	KJ01_087		1	30215191	Cheon et al. 2018
203	chr1_30307657	KJ01_088		1	30307657	Cheon et al. 2019
204	chr1_30341513	s01_30341513		1	30341513	Arbelaez et al. 2019
205	chr1_30569798	s01_30569798		1	30569798	Arbelaez et al. 2019
206	chr1_31000992	KJS01_022		1	31000992	Cheon et al. 2020
207	chr1_31246608	KJS01_023		1	31246608	Cheon et al. 2020
208	chr1_31396842	s01_31396842		1	31396842	Arbelaez et al. 2019
209	chr1_31508266	KJS01_024		1	31508266	Cheon et al. 2020
210	chr1_31720419	KJS01_025		1	31720419	Cheon et al. 2020
211	chr1_31859289	KJ01_089		1	31859289	Cheon et al. 2018
212	chr1_31896769	KJ01_090		1	31896769	Cheon et al. 2019
213	chr1_32041358	s01_32041358		1	32041358	Arbelaez et al. 2019
214	chr1_32130527	KJ01_091		1	32130527	Cheon et al. 2018
215	chr1_32284104	SK01_32284104		1	32284104	Yang et al. 2019
216	chr1_32356312	KJ01_092		1	32356312	Cheon et al. 2019
217	chr1_32359998	s01_32359998		1	32359998	Arbelaez et al. 2019
218	chr1_32551664	KJ01_093		1	32551664	Cheon et al. 2018
219	chr1_32563460	s01_32563460		1	32563460	Arbelaez et al. 2019
220	chr1_32734306	KJ01_094		1	32734306	Cheon et al. 2019
221	chr1_32998897	KGH01_020		1	32998897	Cheon et al. 2020
222	chr1_33164035	s01_33164035		1	33164035	Arbelaez et al. 2019
223	chr1_33176515	KJ01_096		1	33176515	Cheon et al. 2019
224	chr1_33340511	KJ01_097		1	33340511	Cheon et al. 2018
225	chr1_33472174	s01_33472174		1	33472174	Arbelaez et al. 2019
226	chr1_33557575	KJ01_098		1	33557575	Cheon et al. 2019
227	chr1_33695501	s01_33695501		1	33695501	Arbelaez et al. 2019
228	chr1_33887084	KJ01_099		1	33887084	Cheon et al. 2018
229	chr1_33901317	s01_33901317		1	33901317	Arbelaez et al. 2019
230	chr1_34102017	KJ01_100		1	34102017	Cheon et al. 2019
231	chr1_34201543	s01_34201543		1	34201543	Arbelaez et al. 2019
232	chr1_34310167	KJ01_101		1	34310167	Cheon et al. 2018
233	chr1_34363755	s01_34363755		1	34363755	Arbelaez et al. 2019
234	chr1_34508997	s01_34508997		1	34508997	Arbelaez et al. 2019
235	chr1_34728965	KJ01_102		1	34728965	Cheon et al. 2019
236	chr1_34731512	KGH01_022		1	34731512	Cheon et al. 2020
237	chr1_34744713	KGH01_023		1	34744713	Cheon et al. 2020
238	chr1_34919159	KJ01_103		1	34919159	Cheon et al. 2018
239	chr1_35190113	KJ01_105		1	35190113	Cheon et al. 2018
240	chr1_35259107	s01_35259107		1	35259107	Arbelaez et al. 2019
241	chr1_35558484	SK01_35558484		1	35558484	Yang et al. 2019
242	chr1_35794891	s01_35794891		1	35794891	Arbelaez et al. 2019
243	chr1_35909958	KJ01_107		1	35909958	Cheon et al. 2018
244	chr1_36150523	s01_36150523		1	36150523	Arbelaez et al. 2019
245	chr1_36419842	s01_36419842		1	36419842	Arbelaez et al. 2019
246	chr1_36445259	SK01_36445259		1	36445259	Yang et al. 2019
247	chr1_36501158	KJ01_109		1	36501158	Cheon et al. 2018
248	chr1_36649551	KJ01_110		1	36649551	Cheon et al. 2019
249	chr1_36683412	SK01_36683412		1	36683412	Yang et al. 2019
250	chr1_37052448	KJ01_111		1	37052448	Cheon et al. 2018
251	chr1_37274755	s01_37274755		1	37274755	Arbelaez et al. 2019
252	chr1_37284842	KJS01_026		1	37284842	Cheon et al. 2020
253	chr1_37540963	KJS01_028		1	37540963	Cheon et al. 2020
254	chr1_37680628	s01_37680628		1	37680628	Arbelaez et al. 2019
255	chr1_37920337	s01_37920337		1	37920337	Arbelaez et al. 2019
256	chr1_37933342	SK01_37933342		1	37933342	Yang et al. 2019
257	chr1_38079312	KJ01_112		1	38079312	Cheon et al. 2019
258	chr1_38104765	KJ01_113		1	38104765	Cheon et al. 2018
259	chr1_38385081	sd1		1	38385081	Sasaki et al. 2002
260	chr1_38632196	s01_38632196		1	38632196	Arbelaez et al. 2019
261	chr1_38959045	SK01_38959045		1	38959045	Yang et al. 2019
262	chr1_39525573	SK01_39525573		1	39525573	Yang et al. 2019
263	chr1_39548506	s01_39548506		1	39548506	Arbelaez et al. 2019
264	chr1_39622533	KJ01_115		1	39622533	Cheon et al. 2018
265	chr1_39810719	KJ01_116		1	39810719	Cheon et al. 2019
266	chr1_39943861	KGH01_024		1	39943861	Cheon et al. 2020
267	chr1_39955529	s01_39955529		1	39955529	Arbelaez et al. 2019
268	chr1_40089944	KJ01_117		1	40089944	Cheon et al. 2018
269	chr1_40437865	KJ01_119		1	40437865	Cheon et al. 2018
270	chr1_40699488	s01_40699488		1	40699488	Arbelaez et al. 2019
271	chr1_40733249	KJ01_120		1	40733249	Cheon et al. 2019
272	chr1_41020155	s01_41020155		1	41020155	Arbelaez et al. 2019
273	chr1_41026337	SK01_41026337		1	41026337	Yang et al. 2019
274	chr1_41090615	KGH01_025		1	41090615	Cheon et al. 2020
275	chr1_41138835	KJ01_121		1	41138835	Cheon et al. 2018
276	chr1_41371769	KJ01_122		1	41371769	Cheon et al. 2019
277	chr1_41546787	KJ01_123		1	41546787	Cheon et al. 2018
278	chr1_41628856	KJ01_124		1	41628856	Cheon et al. 2019
279	chr1_41822712	SK01_41822712		1	41822712	Yang et al. 2019
280	chr1_41911439	s01_41911439		1	41911439	Arbelaez et al. 2019
281	chr1_41979600	KJ01_125		1	41979600	Cheon et al. 2018
282	chr1_42234111	KJ01_126		1	42234111	Cheon et al. 2019
283	chr1_42357534	SK01_42357534		1	42357534	Yang et al. 2019
284	chr1_42425574	s01_42425574		1	42425574	Arbelaez et al. 2019
285	chr1_42482913	KJ01_127		1	42482913	Cheon et al. 2018
286	chr1_42555349	s01_42555349		1	42555349	Arbelaez et al. 2019
287	chr1_42581030	SK01_42581030		1	42581030	Yang et al. 2019
288	chr1_42661152	KJ01_128		1	42661152	Cheon et al. 2019
289	chr1_42877440	s01_42877440		1	42877440	Arbelaez et al. 2019
290	chr1_42946801	KJ01_129		1	42946801	Cheon et al. 2018
291	chr1_43074709	s01_43074709		1	43074709	Arbelaez et al. 2019
292	chr1_43140530	KJ01_130		1	43140530	Cheon et al. 2019
293	chr1_43200421	SK01_43200421		1	43200421	Yang et al. 2019
			1 개수	293
294	chr2_103273	s02_103273		2	103273	Arbelaez et al. 2019
295	chr2_118723	KJS02_001		2	118723	Cheon et al. 2020
296	chr2_316859	s02_316859		2	316859	Arbelaez et al. 2019
297	chr2_390336	KJS02_002		2	390336	Cheon et al. 2020
298	chr2_494373	s02_494373		2	494373	Arbelaez et al. 2019
299	chr2_603490	KJS02_003		2	603490	Cheon et al. 2020
300	chr2_629512	s02_629512		2	629512	Arbelaez et al. 2019
301	chr2_890901	s02_890901		2	890901	Arbelaez et al. 2019
302	chr2_1000481	SK02_1000481		2	1000481	Yang et al. 2019
303	chr2_1076260	SK02_1076260		2	1076260	Yang et al. 2019
304	chr2_1082416	s02_1082416		2	1082416	Arbelaez et al. 2019
305	chr2_1090736	SK02_1090736		2	1090736	Yang et al. 2019
306	chr2_1139715	KJS02_004		2	1139715	Cheon et al. 2020
307	chr2_1288670	s02_1288670		2	1288670	Arbelaez et al. 2019
308	chr2_1380527	s02_1380527		2	1380527	Arbelaez et al. 2019
309	chr2_1464369	KJS02_005		2	1464369	Cheon et al. 2020
310	chr2_1487009	s02_1487009		2	1487009	Arbelaez et al. 2019
311	chr2_1660713	s02_1660713		2	1660713	Arbelaez et al. 2019
312	chr2_1920981	KJS02_006		2	1920981	Cheon et al. 2020
313	chr2_1968779	SK02_1968779		2	1968779	Yang et al. 2019
314	chr2_2008370	s02_2008370		2	2008370	Arbelaez et al. 2019
315	chr2_2334960	s02_2334960		2	2334960	Arbelaez et al. 2019
316	chr2_2819095	s02_2819095		2	2819095	Arbelaez et al. 2019
317	chr2_2879584	SK02_2879584		2	2879584	Yang et al. 2019
318	chr2_3136771	s02_3136771		2	3136771	Arbelaez et al. 2019
319	chr2_3230775	SK02_3230775		2	3230775	Yang et al. 2019
320	chr2_3232811	KGH02_001		2	3232811	Cheon et al. 2020
321	chr2_3477202	s02_3477202		2	3477202	Arbelaez et al. 2019
322	chr2_3548115	KJ02_001		2	3548115	Cheon et al. 2018
323	chr2_3622167	KJ02_002		2	3622167	Cheon et al. 2019
324	chr2_3830712	s02_3830712		2	3830712	Arbelaez et al. 2019
325	chr2_4047646	s02_4047646		2	4047646	Arbelaez et al. 2019
326	chr2_4342883	s02_4342883		2	4342883	Arbelaez et al. 2019
327	chr2_4372712	KJ02_003		2	4372712	Cheon et al. 2018
328	chr2_4419382	KJ02_004		2	4419382	Cheon et al. 2019
329	chr2_4605390	SK02_4605390		2	4605390	Yang et al. 2019
330	chr2_4656692	KJ02_005		2	4656692	Cheon et al. 2018
331	chr2_4823175	s02_4823175		2	4823175	Arbelaez et al. 2019
332	chr2_4927125	KJ02_006		2	4927125	Cheon et al. 2019
333	chr2_4930742	s02_4930742		2	4930742	Arbelaez et al. 2019
334	chr2_5029300	SK02_5029300		2	5029300	Yang et al. 2019
335	chr2_5120420	KJ02_007		2	5120420	Cheon et al. 2018
336	chr2_5231169	s02_5231169		2	5231169	Arbelaez et al. 2019
337	chr2_5329403	KJ02_008		2	5329403	Cheon et al. 2019
338	chr2_5523756	KJ02_009		2	5523756	Cheon et al. 2018
339	chr2_5670594	KJ02_010		2	5670594	Cheon et al. 2019
340	chr2_5786547	SK02_5786547		2	5786547	Yang et al. 2019
341	chr2_5819810	KJ02_011		2	5819810	Cheon et al. 2018
342	chr2_5836334	s02_5836334		2	5836334	Arbelaez et al. 2019
343	chr2_6186335	s02_6186335		2	6186335	Arbelaez et al. 2019
344	chr2_6373446	s02_6373446		2	6373446	Arbelaez et al. 2019
345	chr2_6500738	KJ02_012		2	6500738	Cheon et al. 2019
346	chr2_6805305	s02_6805305		2	6805305	Arbelaez et al. 2019
347	chr2_7342223	s02_7342223		2	7342223	Arbelaez et al. 2019
348	chr2_7468550	SK02_7468550		2	7468550	Yang et al. 2019
349	chr2_7581871	KJS02_007		2	7581871	Cheon et al. 2020
350	chr2_7801801	KJ02_013		2	7801801	Cheon et al. 2018
351	chr2_7828021	KJ02_014		2	7828021	Cheon et al. 2019
352	chr2_8019748	s02_8019748		2	8019748	Arbelaez et al. 2019
353	chr2_8119760	SK02_8119760		2	8119760	Yang et al. 2019
354	chr2_8701699	SK02_8701699		2	8701699	Yang et al. 2019
355	chr2_8814718	s02_8814718		2	8814718	Arbelaez et al. 2019
356	chr2_8857888	KJS02_009		2	8857888	Cheon et al. 2020
357	chr2_8917955	KJS02_010		2	8917955	Cheon et al. 2020
358	chr2_8978321	SK02_8978321		2	8978321	Yang et al. 2019
359	chr2_9044730	SK02_9044730		2	9044730	Yang et al. 2019
360	chr2_9106318	KJ02_016		2	9106318	Cheon et al. 2019
361	chr2_9449360	KJ02_018		2	9449360	Cheon et al. 2019
362	chr2_9570228	s02_9570228		2	9570228	Arbelaez et al. 2019
363	chr2_9780295	KJ02_019		2	9780295	Cheon et al. 2018
364	chr2_9801099	s02_9801099		2	9801099	Arbelaez et al. 2019
365	chr2_9975660	s02_9975660		2	9975660	Arbelaez et al. 2019
366	chr2_9978736	KJ02_020		2	9978736	Cheon et al. 2019
367	chr2_10167522	SK02_10167522		2	10167522	Yang et al. 2019
368	chr2_10262031	KGH02_002		2	10262031	Cheon et al. 2020
369	chr2_10555263	s02_10555263		2	10555263	Arbelaez et al. 2019
370	chr2_10801112	KJ02_023		2	10801112	Cheon et al. 2018
371	chr2_10874369	s02_10874369		2	10874369	Arbelaez et al. 2019
372	chr2_11073926	KGH02_003		2	11073926	Cheon et al. 2020
373	chr2_11097886	KJ02_024		2	11097886	Cheon et al. 2019
374	chr2_11102648	s02_11102648		2	11102648	Arbelaez et al. 2019
375	chr2_11211324	KJ02_025		2	11211324	Cheon et al. 2018
376	chr2_11381586	KJ02_026		2	11381586	Cheon et al. 2019
377	chr2_11549357	KJS02_011		2	11549357	Cheon et al. 2020
378	chr2_11701123	s02_11701123		2	11701123	Arbelaez et al. 2019
379	chr2_11999446	SK02_11999446		2	11999446	Yang et al. 2019
380	chr2_12153399	KJS02_014		2	12153399	Cheon et al. 2020
381	chr2_13962476	s02_13962476		2	13962476	Arbelaez et al. 2019
382	chr2_14335102	KGH02_004		2	14335102	Cheon et al. 2020
383	chr2_15300681	KJS02_015		2	15300681	Cheon et al. 2020
384	chr2_15775411	SK02_15775411		2	15775411	Yang et al. 2019
385	chr2_16123749	KJS02_016		2	16123749	Cheon et al. 2020
386	chr2_16224316	s02_16224316		2	16224316	Arbelaez et al. 2019
387	chr2_16464872	s02_16464872		2	16464872	Arbelaez et al. 2019
388	chr2_16919033	s02_16919033		2	16919033	Arbelaez et al. 2019
389	chr2_17152814	SK02_17152814		2	17152814	Yang et al. 2019
390	chr2_17160895	s02_17160895		2	17160895	Arbelaez et al. 2019
391	chr2_17328724	KJS02_017		2	17328724	Cheon et al. 2020
392	chr2_17486274	KJS02_018		2	17486274	Cheon et al. 2020
393	chr2_17497082	SK02_17497082		2	17497082	Yang et al. 2019
394	chr2_17853792	KJS02_020		2	17853792	Cheon et al. 2020
395	chr2_18072082	KJS02_021		2	18072082	Cheon et al. 2020
396	chr2_18128941	KJS02_022		2	18128941	Cheon et al. 2020
397	chr2_18310026	KGH02_005		2	18310026	Cheon et al. 2020
398	chr2_18370293	s02_18370293		2	18370293	Arbelaez et al. 2019
399	chr2_18811812	s02_18811812		2	18811812	Arbelaez et al. 2019
400	chr2_18870899	SK02_18870899		2	18870899	Yang et al. 2019
401	chr2_19283769	s02_19283769		2	19283769	Arbelaez et al. 2019
402	chr2_19483986	KJ02_027		2	19483986	Cheon et al. 2018
403	chr2_19642635	s02_19642635		2	19642635	Arbelaez et al. 2019
404	chr2_19672436	KJ02_028		2	19672436	Cheon et al. 2019
405	chr2_19888551	KJ02_029		2	19888551	Cheon et al. 2018
406	chr2_19981768	s02_19981768		2	19981768	Arbelaez et al. 2019
407	chr2_20079102	KJ02_030		2	20079102	Cheon et al. 2019
408	chr2_20145859	s02_20145859		2	20145859	Arbelaez et al. 2019
409	chr2_20335697	KJ02_031		2	20335697	Cheon et al. 2018
410	chr2_20351059	SK02_20351059		2	20351059	Yang et al. 2019
411	chr2_20720720	SK02_20720720		2	20720720	Yang et al. 2019
412	chr2_20824958	s02_20824958		2	20824958	Arbelaez et al. 2019
413	chr2_21060669	s02_21060669		2	21060669	Arbelaez et al. 2019
414	chr2_21123989	KJ02_032		2	21123989	Cheon et al. 2019
415	chr2_21592733	KJ02_033		2	21592733	Cheon et al. 2018
416	chr2_21610852	SK02_21610852		2	21610852	Yang et al. 2019
417	chr2_21779087	KJ02_034		2	21779087	Cheon et al. 2019
418	chr2_21832777	s02_21832777		2	21832777	Arbelaez et al. 2019
419	chr2_21983655	KJ02_035		2	21983655	Cheon et al. 2018
420	chr2_22218724	KJ02_036		2	22218724	Cheon et al. 2019
421	chr2_22334916	SK02_22334916		2	22334916	Yang et al. 2019
422	chr2_22336215	SK02_22336215		2	22336215	Yang et al. 2019
423	chr2_22340836	s02_22340836		2	22340836	Arbelaez et al. 2019
424	chr2_22584996	KJ02_038		2	22584996	Cheon et al. 2019
425	chr2_22684234	KJ02_039		2	22684234	Cheon et al. 2018
426	chr2_23073414	s02_23073414		2	23073414	Arbelaez et al. 2019
427	chr2_23078724	KJ02_040		2	23078724	Cheon et al. 2019
428	chr2_23182326	KJ02_041		2	23182326	Cheon et al. 2018
429	chr2_23396915	s02_23396915		2	23396915	Arbelaez et al. 2019
430	chr2_23538743	s02_23538743		2	23538743	Arbelaez et al. 2019
431	chr2_23599651	SK02_23599651		2	23599651	Yang et al. 2019
432	chr2_23739361	KJ02_042		2	23739361	Cheon et al. 2019
433	chr2_23850625	KJ02_043		2	23850625	Cheon et al. 2018
434	chr2_23852677	s02_23852677		2	23852677	Arbelaez et al. 2019
435	chr2_24062285	KJ02_044		2	24062285	Cheon et al. 2019
436	chr2_24100885	SK02_24100885		2	24100885	Yang et al. 2019
437	chr2_24168273	s02_24168273		2	24168273	Arbelaez et al. 2019
438	chr2_24236917	SK02_24236917		2	24236917	Yang et al. 2019
439	chr2_24264653	s02_24264653		2	24264653	Arbelaez et al. 2019
440	chr2_24278925	KJ02_045		2	24278925	Cheon et al. 2018
441	chr2_24478726	KJ02_046		2	24478726	Cheon et al. 2019
442	chr2_24517313	SK02_24517313		2	24517313	Yang et al. 2019
443	chr2_24529876	KGH02_008		2	24529876	Cheon et al. 2020
444	chr2_24582137	KJ02_047		2	24582137	Cheon et al. 2018
445	chr2_24720321	SK02_24720321		2	24720321	Yang et al. 2019
446	chr2_24739001	KGH02_009		2	24739001	Cheon et al. 2020
447	chr2_24772301	s02_24772301		2	24772301	Arbelaez et al. 2019
448	chr2_24884978	KJ02_048		2	24884978	Cheon et al. 2019
449	chr2_24887320	s02_24887320		2	24887320	Arbelaez et al. 2019
450	chr2_25019879	KJ02_049		2	25019879	Cheon et al. 2018
451	chr2_25162443	KJ02_050		2	25162443	Cheon et al. 2019
452	chr2_25193353	s02_25193353		2	25193353	Arbelaez et al. 2019
453	chr2_25415397	s02_25415397		2	25415397	Arbelaez et al. 2019
454	chr2_25510192	KJ02_051		2	25510192	Cheon et al. 2018
455	chr2_25949636	s02_25949636		2	25949636	Arbelaez et al. 2019
456	chr2_26003809	KJ02_052		2	26003809	Cheon et al. 2019
457	chr2_26176180	KJ02_053		2	26176180	Cheon et al. 2018
458	chr2_26252449	KJ02_054		2	26252449	Cheon et al. 2019
459	chr2_26406867	s02_26406867		2	26406867	Arbelaez et al. 2019
460	chr2_26684782	KJ02_056		2	26684782	Cheon et al. 2019
461	chr2_26691450	KJ02_057		2	26691450	Cheon et al. 2018
462	chr2_27049326	KJ02_058		2	27049326	Cheon et al. 2019
463	chr2_27208843	SK02_27208843		2	27208843	Yang et al. 2019
464	chr2_27272711	KJS02_023		2	27272711	Cheon et al. 2020
465	chr2_27548893	s02_27548893		2	27548893	Arbelaez et al. 2019
466	chr2_27883376	SK02_27883376		2	27883376	Yang et al. 2019
467	chr2_28049479	s02_28049479		2	28049479	Arbelaez et al. 2019
468	chr2_28099028	KJS02_027		2	28099028	Cheon et al. 2020
469	chr2_28173954	KJ02_061		2	28173954	Cheon et al. 2018
470	chr2_28211032	s02_28211032		2	28211032	Arbelaez et al. 2019
471	chr2_28329161	KJS02_028		2	28329161	Cheon et al. 2020
472	chr2_28487730	KJS02_029		2	28487730	Cheon et al. 2020
473	chr2_28778297	s02_28778297		2	28778297	Arbelaez et al. 2019
474	chr2_28920026	SK02_28920026		2	28920026	Yang et al. 2019
475	chr2_29187837	KJ02_062		2	29187837	Cheon et al. 2019
476	chr2_29343781	SK02_29343781		2	29343781	Yang et al. 2019
477	chr2_29415200	s02_29415200		2	29415200	Arbelaez et al. 2019
478	chr2_29568762	s02_29568762		2	29568762	Arbelaez et al. 2019
479	chr2_29718772	s02_29718772		2	29718772	Arbelaez et al. 2019
480	chr2_29736272	KJ02_064		2	29736272	Cheon et al. 2019
481	chr2_29958026	KJ02_065		2	29958026	Cheon et al. 2018
482	chr2_30196217	KJS02_031		2	30196217	Cheon et al. 2020
483	chr2_30295035	SK02_30295035		2	30295035	Yang et al. 2019
484	chr2_30345735	s02_30345735		2	30345735	Arbelaez et al. 2019
485	chr2_30530432	s02_30530432		2	30530432	Arbelaez et al. 2019
486	chr2_30815946	KJS02_034		2	30815946	Cheon et al. 2020
487	chr2_30869769	SK02_30869769		2	30869769	Yang et al. 2019
488	chr2_31004451	KJS02_035		2	31004451	Cheon et al. 2020
489	chr2_31113969	KJS02_036		2	31113969	Cheon et al. 2020
490	chr2_31135814	s02_31135814		2	31135814	Arbelaez et al. 2019
491	chr2_31269371	SK02_31269371		2	31269371	Yang et al. 2019
492	chr2_31403314	s02_31403314		2	31403314	Arbelaez et al. 2019
493	chr2_31546386	KJ02_068		2	31546386	Cheon et al. 2019
494	chr2_31678155	s02_31678155		2	31678155	Arbelaez et al. 2019
495	chr2_31914486	s02_31914486		2	31914486	Arbelaez et al. 2019
496	chr2_32060976	SK02_32060976		2	32060976	Yang et al. 2019
497	chr2_32101050	s02_32101050		2	32101050	Arbelaez et al. 2019
498	chr2_32118114	KJ02_071		2	32118114	Cheon et al. 2018
499	chr2_32303539	s02_32303539		2	32303539	Arbelaez et al. 2019
500	chr2_32531138	SK02_32531138		2	32531138	Yang et al. 2019
501	chr2_32599323	KGH02_010		2	32599323	Cheon et al. 2020
502	chr2_32959229	KGH02_011		2	32959229	Cheon et al. 2020
503	chr2_33035683	s02_33035683		2	33035683	Arbelaez et al. 2019
504	chr2_33082359	SK02_33082359		2	33082359	Yang et al. 2019
505	chr2_33142844	KJ02_073		2	33142844	Cheon et al. 2018
506	chr2_33208146	KJ02_074		2	33208146	Cheon et al. 2019
507	chr2_33465007	KJ02_075		2	33465007	Cheon et al. 2018
508	chr2_33923958	SK02_33923958		2	33923958	Yang et al. 2019
509	chr2_33973330	KJ02_077		2	33973330	Cheon et al. 2018
510	chr2_34072964	s02_34072964		2	34072964	Arbelaez et al. 2019
511	chr2_34425408	s02_34425408		2	34425408	Arbelaez et al. 2019
512	chr2_34483409	KGH02_012		2	34483409	Cheon et al. 2020
513	chr2_34635870	KJ02_079		2	34635870	Cheon et al. 2018
514	chr2_34687983	SK02_34687983		2	34687983	Yang et al. 2019
515	chr2_34707946	s02_34707946		2	34707946	Arbelaez et al. 2019
516	chr2_34745395	KGH02_013		2	34745395	Cheon et al. 2020
517	chr2_34759938	KGH02_014		2	34759938	Cheon et al. 2020
518	chr2_34865754	s02_34865754		2	34865754	Arbelaez et al. 2019
519	chr2_34868096	s02_34868096		2	34868096	Arbelaez et al. 2019
520	chr2_35036091	KGH02_015		2	35036091	Cheon et al. 2020
521	chr2_35088373	KGH02_016		2	35088373	Cheon et al. 2020
522	chr2_35094096	KGH02_017		2	35094096	Cheon et al. 2020
523	chr2_35115546	KGH02_018		2	35115546	Cheon et al. 2020
524	chr2_35115567	SK02_35115567		2	35115567	Yang et al. 2019
525	chr2_35187201	KJ02_081		2	35187201	Cheon et al. 2018
526	chr2_35216781	s02_35216781		2	35216781	Arbelaez et al. 2019
527	chr2_35401891	s02_35401891		2	35401891	Arbelaez et al. 2019
528	chr2_35501042	KGH02_019		2	35501042	Cheon et al. 2020
529	chr2_35568365	s02_35568365		2	35568365	Arbelaez et al. 2019
530	chr2_35587883	KJ02_083		2	35587883	Cheon et al. 2018
531	chr2_35762475	KGH02_020		2	35762475	Cheon et al. 2020
532	chr2_35788038	KJ02_084		2	35788038	Cheon et al. 2019
533	chr2_35812152	KGH02_021		2	35812152	Cheon et al. 2020
534	chr2_35933995	SK02_35933995		2	35933995	Yang et al. 2019
			2 개수	241
535	chr3_204361	KJ03_001		3	204361	Cheon et al. 2018
536	chr3_220026	SK03_220026		3	220026	Yang et al. 2019
537	chr3_422648	SK03_422648		3	422648	Yang et al. 2019
538	chr3_431667	SK03_431667		3	431667	Yang et al. 2019
539	chr3_484812	s03_484812		3	484812	Arbelaez et al. 2019
540	chr3_517088	KJ03_003		3	517088	Cheon et al. 2018
541	chr3_851785	s03_851785		3	851785	Arbelaez et al. 2019
542	chr3_872082	SK03_872082		3	872082	Yang et al. 2019
543	chr3_962390	KJ03_004		3	962390	Cheon et al. 2019
544	chr3_1164119	KJ03_005		3	1164119	Cheon et al. 2018
545	chr3_1270943	s03_1270943		3	1270943	Arbelaez et al. 2019
546	chr3_1481412	s03_1481412		3	1481412	Arbelaez et al. 2019
547	chr3_1545991	KJ03_006		3	1545991	Cheon et al. 2019
548	chr3_1729434	KJ03_007		3	1729434	Cheon et al. 2018
549	chr3_1761412	s03_1761412		3	1761412	Arbelaez et al. 2019
550	chr3_1789405	SK03_1789405		3	1789405	Yang et al. 2019
551	chr3_1923995	KJ03_008		3	1923995	Cheon et al. 2019
552	chr3_2086941	SK03_2086941		3	2086941	Yang et al. 2019
553	chr3_2151496	s03_2151496		3	2151496	Arbelaez et al. 2019
554	chr3_2373946	SK03_2373946		3	2373946	Yang et al. 2019
555	chr3_2727136	SK03_2727136		3	2727136	Yang et al. 2019
556	chr3_2745334	KJ03_010		3	2745334	Cheon et al. 2019
557	chr3_2885423	s03_2885423		3	2885423	Arbelaez et al. 2019
558	chr3_3382980	s03_3382980		3	3382980	Arbelaez et al. 2019
559	chr3_3595445	KJS03_003		3	3595445	Cheon et al. 2020
560	chr3_3655067	SK03_3655067		3	3655067	Yang et al. 2019
561	chr3_3657643	s03_3657643		3	3657643	Arbelaez et al. 2019
562	chr3_3704047	SK03_3704047		3	3704047	Yang et al. 2019
563	chr3_4007709	KJS03_005		3	4007709	Cheon et al. 2020
564	chr3_4047654	s03_4047654		3	4047654	Arbelaez et al. 2019
565	chr3_4213581	KJ03_013		3	4213581	Cheon et al. 2018
566	chr3_4321231	s03_4321231		3	4321231	Arbelaez et al. 2019
567	chr3_4338025	KGH03_001		3	4338025	Cheon et al. 2020
568	chr3_4409689	SK03_4409689		3	4409689	Yang et al. 2019
569	chr3_4427241	KJ03_015		3	4427241	Cheon et al. 2018
570	chr3_4788297	KJ03_016		3	4788297	Cheon et al. 2019
571	chr3_5109298	s03_5109298		3	5109298	Arbelaez et al. 2019
572	chr3_5452580	SK03_5452580		3	5452580	Yang et al. 2019
573	chr3_5676626	KJ03_017		3	5676626	Cheon et al. 2018
574	chr3_5824894	KJ03_018		3	5824894	Cheon et al. 2019
575	chr3_5880211	s03_5880211		3	5880211	Arbelaez et al. 2019
576	chr3_6251476	KJ03_019		3	6251476	Cheon et al. 2018
577	chr3_6283461	s03_6283461		3	6283461	Arbelaez et al. 2019
578	chr3_6418648	KJ03_020		3	6418648	Cheon et al. 2019
579	chr3_6633863	KJ03_021		3	6633863	Cheon et al. 2018
580	chr3_6830072	KJ03_022		3	6830072	Cheon et al. 2019
581	chr3_6902921	s03_6902921		3	6902921	Arbelaez et al. 2019
582	chr3_7440357	SK03_7440357		3	7440357	Yang et al. 2019
583	chr3_7605347	s03_7605347		3	7605347	Arbelaez et al. 2019
584	chr3_8182713	KGH03_002		3	8182713	Cheon et al. 2020
585	chr3_8398821	KGH03_004		3	8398821	Cheon et al. 2020
586	chr3_8414645	KGH03_005		3	8414645	Cheon et al. 2020
587	chr3_8434986	KGH03_006		3	8434986	Cheon et al. 2020
588	chr3_8532555	s03_8532555		3	8532555	Arbelaez et al. 2019
589	chr3_8711509	s03_8711509		3	8711509	Arbelaez et al. 2019
590	chr3_9026803	s03_9026803		3	9026803	Arbelaez et al. 2019
591	chr3_9333643	SK03_9333643		3	9333643	Yang et al. 2019
592	chr3_9375374	s03_9375374		3	9375374	Arbelaez et al. 2019
593	chr3_9601602	KJS03_006		3	9601602	Cheon et al. 2020
594	chr3_9636224	s03_9636224		3	9636224	Arbelaez et al. 2019
595	chr3_9751213	s03_9751213		3	9751213	Arbelaez et al. 2019
596	chr3_9878813	s03_9878813		3	9878813	Arbelaez et al. 2019
597	chr3_9913627	SK03_9913627		3	9913627	Yang et al. 2019
598	chr3_10184356	s03_10184356		3	10184356	Arbelaez et al. 2019
599	chr3_10467906	KJS03_007		3	10467906	Cheon et al. 2020
600	chr3_10544320	s03_10544320		3	10544320	Arbelaez et al. 2019
601	chr3_10798982	s03_10798982		3	10798982	Arbelaez et al. 2019
602	chr3_10819217	KJ03_023		3	10819217	Cheon et al. 2018
603	chr3_11025459	SK03_11025459		3	11025459	Yang et al. 2019
604	chr3_11031220	s03_11031220		3	11031220	Arbelaez et al. 2019
605	chr3_11644944	s03_11644944		3	11644944	Arbelaez et al. 2019
606	chr3_11697508	KJ03_026		3	11697508	Cheon et al. 2019
607	chr3_11851886	s03_11851886		3	11851886	Arbelaez et al. 2019
608	chr3_12345604	KJ03_029		3	12345604	Cheon et al. 2018
609	chr3_12564300	s03_12564300		3	12564300	Arbelaez et al. 2019
610	chr3_12785160	KJ03_031		3	12785160	Cheon et al. 2018
611	chr3_13045075	KJ03_032		3	13045075	Cheon et al. 2019
612	chr3_13122748	KJ03_033		3	13122748	Cheon et al. 2018
613	chr3_13156156	SK03_13156156		3	13156156	Yang et al. 2019
614	chr3_13224089	SK03_13224089		3	13224089	Yang et al. 2019
615	chr3_13776057	KJS03_009		3	13776057	Cheon et al. 2020
616	chr3_13932387	s03_13932387		3	13932387	Arbelaez et al. 2019
617	chr3_14106798	KJS03_010		3	14106798	Cheon et al. 2020
618	chr3_14169727	s03_14169727		3	14169727	Arbelaez et al. 2019
619	chr3_14171041	KJS03_011		3	14171041	Cheon et al. 2020
620	chr3_14288844	KJS03_012		3	14288844	Cheon et al. 2020
621	chr3_14554651	s03_14554651		3	14554651	Arbelaez et al. 2019
622	chr3_14603458	SK03_14603458		3	14603458	Yang et al. 2019
623	chr3_14777813	s03_14777813		3	14777813	Arbelaez et al. 2019
624	chr3_14830128	KJS03_013		3	14830128	Cheon et al. 2020
625	chr3_14904428	SK03_14904428		3	14904428	Yang et al. 2019
626	chr3_14932671	SK03_14932671		3	14932671	Yang et al. 2019
627	chr3_14990404	SK03_14990404		3	14990404	Yang et al. 2019
628	chr3_15001183	SK03_15001183		3	15001183	Yang et al. 2019
629	chr3_15074046	SK03_15074046		3	15074046	Yang et al. 2019
630	chr3_15106953	SK03_15106953		3	15106953	Yang et al. 2019
631	chr3_15365726	s03_15365726		3	15365726	Arbelaez et al. 2019
632	chr3_15397382	SK03_15397382		3	15397382	Yang et al. 2019
633	chr3_15485201	KJ03_034		3	15485201	Cheon et al. 2019
634	chr3_16075626	SK03_16075626		3	16075626	Yang et al. 2019
635	chr3_16458072	KGH03_008		3	16458072	Cheon et al. 2020
636	chr3_16551597	KGH03_009		3	16551597	Cheon et al. 2020
637	chr3_16708131	SK03_16708131		3	16708131	Yang et al. 2019
638	chr3_16733441	SK03_16733441		3	16733441	Yang et al. 2019
639	chr3_16877782	KJ03_035		3	16877782	Cheon et al. 2018
640	chr3_17092696	SK03_17092696		3	17092696	Yang et al. 2019
641	chr3_17262406	SK03_17262406		3	17262406	Yang et al. 2019
642	chr3_17273847	KJ03_036		3	17273847	Cheon et al. 2019
643	chr3_17307455	s03_17307455		3	17307455	Arbelaez et al. 2019
644	chr3_17439699	KJ03_037		3	17439699	Cheon et al. 2018
645	chr3_17786669	KJ03_038		3	17786669	Cheon et al. 2019
646	chr3_17827706	s03_17827706		3	17827706	Arbelaez et al. 2019
647	chr3_18053119	SK03_18053119		3	18053119	Yang et al. 2019
648	chr3_18107418	KJ03_039		3	18107418	Cheon et al. 2018
649	chr3_18273682	s03_18273682		3	18273682	Arbelaez et al. 2019
650	chr3_18629240	s03_18629240		3	18629240	Arbelaez et al. 2019
651	chr3_19143571	KJ03_043		3	19143571	Cheon et al. 2018
652	chr3_19245532	SK03_19245532		3	19245532	Yang et al. 2019
653	chr3_19428982	KJ03_044		3	19428982	Cheon et al. 2019
654	chr3_19862435	SK03_19862435		3	19862435	Yang et al. 2019
655	chr3_19929911	s03_19929911		3	19929911	Arbelaez et al. 2019
656	chr3_19960058	KJ03_046		3	19960058	Cheon et al. 2019
657	chr3_20053624	KJ03_047		3	20053624	Cheon et al. 2018
658	chr3_20363332	KJ03_048		3	20363332	Cheon et al. 2019
659	chr3_20832905	KJ03_050		3	20832905	Cheon et al. 2019
660	chr3_21003404	s03_21003404		3	21003404	Arbelaez et al. 2019
661	chr3_21258737	SK03_21258737		3	21258737	Yang et al. 2019
662	chr3_21309886	KJS03_016		3	21309886	Cheon et al. 2020
663	chr3_21465191	KJ03_053		3	21465191	Cheon et al. 2018
664	chr3_21728184	KJ03_054		3	21728184	Cheon et al. 2019
665	chr3_22050510	s03_22050510		3	22050510	Arbelaez et al. 2019
666	chr3_22234816	SK03_22234816		3	22234816	Yang et al. 2019
667	chr3_22264563	SK03_22264563		3	22264563	Yang et al. 2019
668	chr3_22407127	KJ03_057		3	22407127	Cheon et al. 2018
669	chr3_22542344	SK03_22542344		3	22542344	Yang et al. 2019
670	chr3_22586460	KJ03_058		3	22586460	Cheon et al. 2019
671	chr3_22633713	s03_22633713		3	22633713	Arbelaez et al. 2019
672	chr3_22641657	SK03_22641657		3	22641657	Yang et al. 2019
673	chr3_22783071	KJS03_018		3	22783071	Cheon et al. 2020
674	chr3_23037368	s03_23037368		3	23037368	Arbelaez et al. 2019
675	chr3_23354868	s03_23354868		3	23354868	Arbelaez et al. 2019
676	chr3_23491435	KJS03_020		3	23491435	Cheon et al. 2020
677	chr3_23851835	s03_23851835		3	23851835	Arbelaez et al. 2019
678	chr3_23957624	KJS03_022		3	23957624	Cheon et al. 2020
679	chr3_24172246	KJS03_023		3	24172246	Cheon et al. 2020
680	chr3_24294753	KJ03_060		3	24294753	Cheon et al. 2019
681	chr3_24413888	s03_24413888		3	24413888	Arbelaez et al. 2019
682	chr3_24682521	s03_24682521		3	24682521	Arbelaez et al. 2019
683	chr3_24699522	KJ03_062		3	24699522	Cheon et al. 2019
684	chr3_24702097	SK03_24702097		3	24702097	Yang et al. 2019
685	chr3_25091244	KJS03_024		3	25091244	Cheon et al. 2020
686	chr3_25157655	s03_25157655		3	25157655	Arbelaez et al. 2019
687	chr3_25259336	s03_25259336		3	25259336	Arbelaez et al. 2019
688	chr3_25288125	KJ03_063		3	25288125	Cheon et al. 2018
689	chr3_25317391	KJ03_064		3	25317391	Cheon et al. 2019
690	chr3_25395900	KGH03_010		3	25395900	Cheon et al. 2020
691	chr3_25530777	s03_25530777		3	25530777	Arbelaez et al. 2019
692	chr3_25833182	s03_25833182		3	25833182	Arbelaez et al. 2019
693	chr3_25983847	KJ03_065		3	25983847	Cheon et al. 2018
694	chr3_26206682	SK03_26206682		3	26206682	Yang et al. 2019
695	chr3_26334305	s03_26334305		3	26334305	Arbelaez et al. 2019
696	chr3_26456796	s03_26456796		3	26456796	Arbelaez et al. 2019
697	chr3_26590992	s03_26590992		3	26590992	Arbelaez et al. 2019
698	chr3_26858590	KJ03_066		3	26858590	Cheon et al. 2019
699	chr3_26982172	s03_26982172		3	26982172	Arbelaez et al. 2019
700	chr3_27054692	SK03_27054692		3	27054692	Yang et al. 2019
701	chr3_27275567	s03_27275567		3	27275567	Arbelaez et al. 2019
702	chr3_27494934	s03_27494934		3	27494934	Arbelaez et al. 2019
703	chr3_27773851	SK03_27773851		3	27773851	Yang et al. 2019
704	chr3_27813704	s03_27813704		3	27813704	Arbelaez et al. 2019
705	chr3_27996878	KJS03_026		3	27996878	Cheon et al. 2020
706	chr3_28167520	KJ03_067		3	28167520	Cheon et al. 2018
707	chr3_28530956	KJ03_068		3	28530956	Cheon et al. 2019
708	chr3_28851199	s03_28851199		3	28851199	Arbelaez et al. 2019
709	chr3_28852757	SK03_28852757		3	28852757	Yang et al. 2019
710	chr3_29152266	s03_29152266		3	29152266	Arbelaez et al. 2019
711	chr3_29187252	KJS03_027		3	29187252	Cheon et al. 2020
712	chr3_29430694	s03_29430694		3	29430694	Arbelaez et al. 2019
713	chr3_30247826	s03_30247826		3	30247826	Arbelaez et al. 2019
714	chr3_30480853	SK03_30480853		3	30480853	Yang et al. 2019
715	chr3_30604896	s03_30604896		3	30604896	Arbelaez et al. 2019
716	chr3_31025197	s03_31025197		3	31025197	Arbelaez et al. 2019
717	chr3_31050704	SK03_31050704		3	31050704	Yang et al. 2019
718	chr3_31190989	s03_31190989		3	31190989	Arbelaez et al. 2019
719	chr3_31427789	s03_31427789		3	31427789	Arbelaez et al. 2019
720	chr3_31441266	SK03_31441266		3	31441266	Yang et al. 2019
721	chr3_31512460	KGH03_011		3	31512460	Cheon et al. 2020
722	chr3_31614921	s03_31614921		3	31614921	Arbelaez et al. 2019
723	chr3_31881886	SK03_31881886		3	31881886	Yang et al. 2019
724	chr3_31919761	s03_31919761		3	31919761	Arbelaez et al. 2019
725	chr3_32063693	s03_32063693		3	32063693	Arbelaez et al. 2019
726	chr3_32355773	KJ03_069		3	32355773	Cheon et al. 2018
727	chr3_32430702	s03_32430702		3	32430702	Arbelaez et al. 2019
728	chr3_32577650	s03_32577650		3	32577650	Arbelaez et al. 2019
729	chr3_32608218	KJS03_028		3	32608218	Cheon et al. 2020
730	chr3_32674916	SK03_32674916		3	32674916	Yang et al. 2019
731	chr3_32808105	KJS03_029		3	32808105	Cheon et al. 2020
732	chr3_32832500	s03_32832500		3	32832500	Arbelaez et al. 2019
733	chr3_33002005	KJS03_030		3	33002005	Cheon et al. 2020
734	chr3_33080942	s03_33080942		3	33080942	Arbelaez et al. 2019
735	chr3_33148842	KJS03_031		3	33148842	Cheon et al. 2020
736	chr3_33319900	s03_33319900		3	33319900	Arbelaez et al. 2019
737	chr3_33693747	SK03_33693747		3	33693747	Yang et al. 2019
738	chr3_33713486	s03_33713486		3	33713486	Arbelaez et al. 2019
739	chr3_33960369	SK03_33960369		3	33960369	Yang et al. 2019
740	chr3_34275405	s03_34275405		3	34275405	Arbelaez et al. 2019
741	chr3_34476308	s03_34476308		3	34476308	Arbelaez et al. 2019
742	chr3_34678981	s03_34678981		3	34678981	Arbelaez et al. 2019
743	chr3_34900043	KJS03_032		3	34900043	Cheon et al. 2020
744	chr3_35093761	s03_35093761		3	35093761	Arbelaez et al. 2019
745	chr3_35636092	s03_35636092		3	35636092	Arbelaez et al. 2019
746	chr3_35824355	s03_35824355		3	35824355	Arbelaez et al. 2019
747	chr3_35942128	KJS03_034		3	35942128	Cheon et al. 2020
748	chr3_36206765	s03_36206765		3	36206765	Arbelaez et al. 2019
			3 개수	214
749	chr4_8167	KJ04_001		4	8167	Cheon et al. 2018
750	chr4_193676	s04_193676		4	193676	Arbelaez et al. 2019
751	chr4_603494	s04_603494		4	603494	Arbelaez et al. 2019
752	chr4_864053	KJ04_004		4	864053	Cheon et al. 2019
753	chr4_998087	KJ04_006		4	998087	Cheon et al. 2019
754	chr4_1022225	s04_1022225		4	1022225	Arbelaez et al. 2019
755	chr4_1043226	KGH04_001		4	1043226	Cheon et al. 2020
756	chr4_1136986	s04_1136986		4	1136986	Arbelaez et al. 2019
757	chr4_1336178	KJ04_007		4	1336178	Cheon et al. 2018
758	chr4_1444825	KJ04_008		4	1444825	Cheon et al. 2019
759	chr4_1719865	s04_1719865		4	1719865	Arbelaez et al. 2019
760	chr4_1843334	KJ04_009		4	1843334	Cheon et al. 2018
761	chr4_1878622	KGH04_003		4	1878622	Cheon et al. 2020
762	chr4_2044263	KJ04_010		4	2044263	Cheon et al. 2019
763	chr4_2245964	KJ04_011		4	2245964	Cheon et al. 2018
764	chr4_2445754	KJ04_012		4	2445754	Cheon et al. 2019
765	chr4_2992621	KJ04_015		4	2992621	Cheon et al. 2018
766	chr4_3411505	s04_3411505		4	3411505	Arbelaez et al. 2019
767	chr4_3843536	KJ04_018		4	3843536	Cheon et al. 2019
768	chr4_4035257	KJ04_019		4	4035257	Cheon et al. 2018
769	chr4_4284661	KJ04_020		4	4284661	Cheon et al. 2019
770	chr4_4411950	SK04_4411950		4	4411950	Yang et al. 2019
771	chr4_4414154	SK04_4414154		4	4414154	Yang et al. 2019
772	chr4_4456304	s04_4456304		4	4456304	Arbelaez et al. 2019
773	chr4_4457978	SK04_4457978		4	4457978	Yang et al. 2019
774	chr4_4526234	KJ04_021		4	4526234	Cheon et al. 2018
775	chr4_4559723	SK04_4559723		4	4559723	Yang et al. 2019
776	chr4_4599886	SK04_4599886		4	4599886	Yang et al. 2019
777	chr4_4647693	SK04_4647693		4	4647693	Yang et al. 2019
778	chr4_4723318	KJ04_022		4	4723318	Cheon et al. 2019
779	chr4_4945262	KJ04_023		4	4945262	Cheon et al. 2018
780	chr4_5111222	s04_5111222		4	5111222	Arbelaez et al. 2019
781	chr4_5377293	KJ04_025		4	5377293	Cheon et al. 2018
782	chr4_5625104	s04_5625104		4	5625104	Arbelaez et al. 2019
783	chr4_5789508	KJ04_027		4	5789508	Cheon et al. 2018
784	chr4_6027557	s04_6027557		4	6027557	Arbelaez et al. 2019
785	chr4_6057384	SK04_6057384		4	6057384	Yang et al. 2019
786	chr4_6193569	s04_6193569		4	6193569	Arbelaez et al. 2019
787	chr4_6384872	KJ04_029		4	6384872	Cheon et al. 2018
788	chr4_6434512	KJ04_030		4	6434512	Cheon et al. 2019
789	chr4_6596219	s04_6596219		4	6596219	Arbelaez et al. 2019
790	chr4_7021579	KGH04_007		4	7021579	Cheon et al. 2020
791	chr4_7025113	KGH04_008		4	7025113	Cheon et al. 2020
792	chr4_7031851	KGH04_009		4	7031851	Cheon et al. 2020
793	chr4_7170237	s04_7170237		4	7170237	Arbelaez et al. 2019
794	chr4_7304413	s04_7304413		4	7304413	Arbelaez et al. 2019
795	chr4_7428150	SK04_7428150		4	7428150	Yang et al. 2019
796	chr4_7432489	KJ04_032		4	7432489	Cheon et al. 2019
797	chr4_7680596	KJ04_033		4	7680596	Cheon et al. 2018
798	chr4_7871436	s04_7871436		4	7871436	Arbelaez et al. 2019
799	chr4_8217877	s04_8217877		4	8217877	Arbelaez et al. 2019
800	chr4_8299964	KJ04_036		4	8299964	Cheon et al. 2019
801	chr4_8837857	SK04_8837857		4	8837857	Yang et al. 2019
802	chr4_8876854	s04_8876854		4	8876854	Arbelaez et al. 2019
803	chr4_9051840	KJ04_039		4	9051840	Cheon et al. 2018
804	chr4_9411427	KJ04_040		4	9411427	Cheon et al. 2019
805	chr4_9929207	KJ04_041		4	9929207	Cheon et al. 2018
806	chr4_10212164	KJ04_042		4	10212164	Cheon et al. 2019
807	chr4_10396788	SK04_10396788		4	10396788	Yang et al. 2019
808	chr4_10468507	s04_10468507		4	10468507	Arbelaez et al. 2019
809	chr4_10695483	KJ04_043		4	10695483	Cheon et al. 2018
810	chr4_10991011	s04_10991011		4	10991011	Arbelaez et al. 2019
811	chr4_11598520	KJ04_046		4	11598520	Cheon et al. 2019
812	chr4_11645506	s04_11645506		4	11645506	Arbelaez et al. 2019
813	chr4_11748452	SK04_11748452		4	11748452	Yang et al. 2019
814	chr4_11832332	KJ04_047		4	11832332	Cheon et al. 2018
815	chr4_11879947	s04_11879947		4	11879947	Arbelaez et al. 2019
816	chr4_11986644	s04_11986644		4	11986644	Arbelaez et al. 2019
817	chr4_12116458	KJ04_048		4	12116458	Cheon et al. 2019
818	chr4_12244931	s04_12244931		4	12244931	Arbelaez et al. 2019
819	chr4_12297152	s04_12297152		4	12297152	Arbelaez et al. 2019
820	chr4_12534847	KJS04_001		4	12534847	Cheon et al. 2020
821	chr4_12550310	SK04_12550310		4	12550310	Yang et al. 2019
822	chr4_12594753	s04_12594753		4	12594753	Arbelaez et al. 2019
823	chr4_12684621	s04_12684621		4	12684621	Arbelaez et al. 2019
824	chr4_12778516	KJS04_002		4	12778516	Cheon et al. 2020
825	chr4_13225981	SK04_13225981		4	13225981	Yang et al. 2019
826	chr4_13404485	KJS04_004		4	13404485	Cheon et al. 2020
827	chr4_13551673	s04_13551673		4	13551673	Arbelaez et al. 2019
828	chr4_13640788	KJS04_005		4	13640788	Cheon et al. 2020
829	chr4_13665093	s04_13665093		4	13665093	Arbelaez et al. 2019
830	chr4_13743580	SK04_13743580		4	13743580	Yang et al. 2019
831	chr4_13798238	KJS04_006		4	13798238	Cheon et al. 2020
832	chr4_14094091	SK04_14094091		4	14094091	Yang et al. 2019
833	chr4_14229856	s04_14229856		4	14229856	Arbelaez et al. 2019
834	chr4_14814591	s04_14814591		4	14814591	Arbelaez et al. 2019
835	chr4_15389648	s04_15389648		4	15389648	Arbelaez et al. 2019
836	chr4_15944977	s04_15944977		4	15944977	Arbelaez et al. 2019
837	chr4_16021780	KJS04_008		4	16021780	Cheon et al. 2020
838	chr4_16289829	s04_16289829		4	16289829	Arbelaez et al. 2019
839	chr4_16559384	s04_16559384		4	16559384	Arbelaez et al. 2019
840	chr4_16715200	s04_16715200		4	16715200	Arbelaez et al. 2019
841	chr4_16935377	SK04_16935377		4	16935377	Yang et al. 2019
842	chr4_16999319	KJS04_011		4	16999319	Cheon et al. 2020
843	chr4_17157142	KJS04_012		4	17157142	Cheon et al. 2020
844	chr4_17250626	KJ04_053		4	17250626	Cheon et al. 2018
845	chr4_17465113	s04_17465113		4	17465113	Arbelaez et al. 2019
846	chr4_17867962	KGH04_011		4	17867962	Cheon et al. 2020
847	chr4_17911519	s04_17911519		4	17911519	Arbelaez et al. 2019
848	chr4_18114091	KJ04_057		4	18114091	Cheon et al. 2018
849	chr4_18136052	s04_18136052		4	18136052	Arbelaez et al. 2019
850	chr4_18342721	SK04_18342721		4	18342721	Yang et al. 2019
851	chr4_18368972	KJS04_013		4	18368972	Cheon et al. 2020
852	chr4_18599368	KJS04_014		4	18599368	Cheon et al. 2020
853	chr4_18706317	s04_18706317		4	18706317	Arbelaez et al. 2019
854	chr4_18754459	SK04_18754459		4	18754459	Yang et al. 2019
855	chr4_18899549	KJS04_016		4	18899549	Cheon et al. 2020
856	chr4_19123643	s04_19123643		4	19123643	Arbelaez et al. 2019
857	chr4_19211611	KJS04_017		4	19211611	Cheon et al. 2020
858	chr4_19353709	s04_19353709		4	19353709	Arbelaez et al. 2019
859	chr4_19541114	KJ04_059		4	19541114	Cheon et al. 2018
860	chr4_19622432	KJ04_060		4	19622432	Cheon et al. 2019
861	chr4_19835234	SK04_19835234		4	19835234	Yang et al. 2019
862	chr4_20132588	KGH04_012		4	20132588	Cheon et al. 2020
863	chr4_20396474	SK04_20396474		4	20396474	Yang et al. 2019
864	chr4_20426399	SK04_20426399		4	20426399	Yang et al. 2019
865	chr4_20495719	KJ04_062		4	20495719	Cheon et al. 2019
866	chr4_20507218	s04_20507218		4	20507218	Arbelaez et al. 2019
867	chr4_21237749	s04_21237749		4	21237749	Arbelaez et al. 2019
868	chr4_21305446	KJS04_019		4	21305446	Cheon et al. 2020
869	chr4_21517348	s04_21517348		4	21517348	Arbelaez et al. 2019
870	chr4_21734385	KGH04_013		4	21734385	Cheon et al. 2020
871	chr4_21815986	SK04_21815986		4	21815986	Yang et al. 2019
872	chr4_21825277	KJ04_067		4	21825277	Cheon et al. 2018
873	chr4_21864875	s04_21864875		4	21864875	Arbelaez et al. 2019
874	chr4_22022073	KJ04_068		4	22022073	Cheon et al. 2019
875	chr4_22171220	KJ04_069		4	22171220	Cheon et al. 2018
876	chr4_22435296	SK04_22435296		4	22435296	Yang et al. 2019
877	chr4_22760222	KJS04_021		4	22760222	Cheon et al. 2020
878	chr4_22808095	s04_22808095		4	22808095	Arbelaez et al. 2019
879	chr4_23114102	KJS04_022		4	23114102	Cheon et al. 2020
880	chr4_23126372	KJS04_023		4	23126372	Cheon et al. 2020
881	chr4_23248365	s04_23248365		4	23248365	Arbelaez et al. 2019
882	chr4_23467371	SK04_23467371		4	23467371	Yang et al. 2019
883	chr4_23485871	KJS04_025		4	23485871	Cheon et al. 2020
884	chr4_23526762	s04_23526762		4	23526762	Arbelaez et al. 2019
885	chr4_23586775	KGH04_014		4	23586775	Cheon et al. 2020
886	chr4_23846299	s04_23846299		4	23846299	Arbelaez et al. 2019
887	chr4_23886835	KJ04_072		4	23886835	Cheon et al. 2019
888	chr4_24250223	KJ04_073		4	24250223	Cheon et al. 2018
889	chr4_24388444	KJ04_074		4	24388444	Cheon et al. 2019
890	chr4_24593462	KJ04_075		4	24593462	Cheon et al. 2018
891	chr4_24747105	KGH04_015		4	24747105	Cheon et al. 2020
892	chr4_24757162	KJ04_076		4	24757162	Cheon et al. 2019
893	chr4_24780440	KJ04_077		4	24780440	Cheon et al. 2018
894	chr4_24949703	SK04_24949703		4	24949703	Yang et al. 2019
895	chr4_25164916	KJS04_027		4	25164916	Cheon et al. 2020
896	chr4_25245272	s04_25245272		4	25245272	Arbelaez et al. 2019
897	chr4_25437295	s04_25437295		4	25437295	Arbelaez et al. 2019
898	chr4_25837976	KJ04_078		4	25837976	Cheon et al. 2019
899	chr4_25898378	SK04_25898378		4	25898378	Yang et al. 2019
900	chr4_25947245	KJS04_028		4	25947245	Cheon et al. 2020
901	chr4_26227955	KJS04_030		4	26227955	Cheon et al. 2020
902	chr4_26309089	s04_26309089		4	26309089	Arbelaez et al. 2019
903	chr4_26422660	KJS04_031		4	26422660	Cheon et al. 2020
904	chr4_26545849	s04_26545849		4	26545849	Arbelaez et al. 2019
905	chr4_26832471	s04_26832471		4	26832471	Arbelaez et al. 2019
906	chr4_26907634	SK04_26907634		4	26907634	Yang et al. 2019
907	chr4_27107735	KJ04_080		4	27107735	Cheon et al. 2019
908	chr4_27179949	KJ04_081		4	27179949	Cheon et al. 2018
909	chr4_27540988	s04_27540988		4	27540988	Arbelaez et al. 2019
910	chr4_27567935	SK04_27567935		4	27567935	Yang et al. 2019
911	chr4_27670273	KJ04_083		4	27670273	Cheon et al. 2018
912	chr4_27755621	KJ04_084		4	27755621	Cheon et al. 2019
913	chr4_27800401	SK04_27800401		4	27800401	Yang et al. 2019
914	chr4_28004788	s04_28004788		4	28004788	Arbelaez et al. 2019
915	chr4_28901886	s04_28901886		4	28901886	Arbelaez et al. 2019
916	chr4_29136343	KJ04_085		4	29136343	Cheon et al. 2018
917	chr4_29405465	KJS04_034		4	29405465	Cheon et al. 2020
918	chr4_29533215	s04_29533215		4	29533215	Arbelaez et al. 2019
919	chr4_29594692	KJS04_035		4	29594692	Cheon et al. 2020
920	chr4_29715617	s04_29715617		4	29715617	Arbelaez et al. 2019
921	chr4_29751343	KJS04_036		4	29751343	Cheon et al. 2020
922	chr4_29881066	s04_29881066		4	29881066	Arbelaez et al. 2019
923	chr4_30174083	s04_30174083		4	30174083	Arbelaez et al. 2019
924	chr4_30198373	KGH04_016		4	30198373	Cheon et al. 2020
925	chr4_30438901	s04_30438901		4	30438901	Arbelaez et al. 2019
926	chr4_30511827	KGH04_019		4	30511827	Cheon et al. 2020
927	chr4_30879875	s04_30879875		4	30879875	Arbelaez et al. 2019
928	chr4_31277196	KGH04_020		4	31277196	Cheon et al. 2020
929	chr4_31341572	KGH04_021		4	31341572	Cheon et al. 2020
930	chr4_31373467	SK04_31373467		4	31373467	Yang et al. 2019
931	chr4_31409353	KJ04_086		4	31409353	Cheon et al. 2019
932	chr4_31450795	KGH04_022		4	31450795	Cheon et al. 2020
933	chr4_31464748	KGH04_023		4	31464748	Cheon et al. 2020
934	chr4_31509863	s04_31509863		4	31509863	Arbelaez et al. 2019
935	chr4_31581963	KJ04_087		4	31581963	Cheon et al. 2018
936	chr4_31671271	KGH04_025		4	31671271	Cheon et al. 2020
937	chr4_31678447	s04_31678447		4	31678447	Arbelaez et al. 2019
938	chr4_31904771	SK04_31904771		4	31904771	Yang et al. 2019
939	chr4_32038496	s04_32038496		4	32038496	Arbelaez et al. 2019
940	chr4_32083594	KGH04_026		4	32083594	Cheon et al. 2020
941	chr4_32189893	s04_32189893		4	32189893	Arbelaez et al. 2019
942	chr4_32196610	KGH04_027		4	32196610	Cheon et al. 2020
943	chr4_32223351	KGH04_028		4	32223351	Cheon et al. 2020
944	chr4_32241178	KGH04_029		4	32241178	Cheon et al. 2020
945	chr4_32259816	KJ04_088		4	32259816	Cheon et al. 2019
946	chr4_32660337	KJ04_089		4	32660337	Cheon et al. 2018
947	chr4_32748870	KGH04_030		4	32748870	Cheon et al. 2020
948	chr4_32807202	KGH04_031		4	32807202	Cheon et al. 2020
949	chr4_32843112	SK04_32843112		4	32843112	Yang et al. 2019
950	chr4_33073892	s04_33073892		4	33073892	Arbelaez et al. 2019
951	chr4_33606106	KJ04_090		4	33606106	Cheon et al. 2019
952	chr4_33626126	SK04_33626126		4	33626126	Yang et al. 2019
953	chr4_33868056	SK04_33868056		4	33868056	Yang et al. 2019
954	chr4_34209963	KJ04_091		4	34209963	Cheon et al. 2018
955	chr4_34382077	KJ04_092		4	34382077	Cheon et al. 2019
956	chr4_34535832	KJ04_093		4	34535832	Cheon et al. 2018
957	chr4_34643455	s04_34643455		4	34643455	Arbelaez et al. 2019
958	chr4_34683717	SK04_34683717		4	34683717	Yang et al. 2019
959	chr4_34925111	s04_34925111		4	34925111	Arbelaez et al. 2019
960	chr4_35078228	KJ04_095		4	35078228	Cheon et al. 2018
961	chr4_35395197	s04_35395197		4	35395197	Arbelaez et al. 2019
			4 개수	213
962	chr5_7130	KJ05_001		5	7130	Cheon et al. 2018
963	chr5_44806	s05_44806		5	44806	Arbelaez et al. 2019
964	chr5_201193	s05_201193		5	201193	Arbelaez et al. 2019
965	chr5_207008	KJ05_002		5	207008	Cheon et al. 2019
966	chr5_437499	xa5_01		5	437499	Arbelaez et al. 2019
967	chr5_440644	s05_440644		5	440644	Arbelaez et al. 2019
968	chr5_591451	KJ05_003		5	591451	Cheon et al. 2018
969	chr5_593158	SK05_593158		5	593158	Yang et al. 2019
970	chr5_641051	KJ05_004		5	641051	Cheon et al. 2019
971	chr5_661832	s05_661832		5	661832	Arbelaez et al. 2019
972	chr5_922530	s05_922530		5	922530	Arbelaez et al. 2019
973	chr5_990754	SK05_990754		5	990754	Yang et al. 2019
974	chr5_1243736	KJ05_005		5	1243736	Cheon et al. 2018
975	chr5_1277191	s05_1277191		5	1277191	Arbelaez et al. 2019
976	chr5_1351848	SK05_1351848		5	1351848	Yang et al. 2019
977	chr5_1487229	s05_1487229		5	1487229	Arbelaez et al. 2019
978	chr5_1766082	KJ05_007		5	1766082	Cheon et al. 2018
979	chr5_2007954	KJ05_008		5	2007954	Cheon et al. 2019
980	chr5_2291156	s05_2291156		5	2291156	Arbelaez et al. 2019
981	chr5_2360311	KJ05_009		5	2360311	Cheon et al. 2018
982	chr5_2394819	KJ05_010		5	2394819	Cheon et al. 2019
983	chr5_2525289	s05_2525289		5	2525289	Arbelaez et al. 2019
984	chr5_2570081	SK05_2570081		5	2570081	Yang et al. 2019
985	chr5_2736952	SK05_2736952		5	2736952	Yang et al. 2019
986	chr5_2831817	KJ05_011		5	2831817	Cheon et al. 2018
987	chr5_2889262	s05_2889262		5	2889262	Arbelaez et al. 2019
988	chr5_3044947	KJ05_012		5	3044947	Cheon et al. 2019
989	chr5_3092113	s05_3092113		5	3092113	Arbelaez et al. 2019
990	chr5_3172800	KJS05_001		5	3172800	Cheon et al. 2020
991	chr5_3207628	SK05_3207628		5	3207628	Yang et al. 2019
992	chr5_3340204	SK05_3340204		5	3340204	Yang et al. 2019
993	chr5_3470087	s05_3470087		5	3470087	Arbelaez et al. 2019
994	chr5_3817643	s05_3817643		5	3817643	Arbelaez et al. 2019
995	chr5_4195403	SK05_4195403		5	4195403	Yang et al. 2019
996	chr5_4205413	s05_4205413		5	4205413	Arbelaez et al. 2019
997	chr5_4589783	s05_4589783		5	4589783	Arbelaez et al. 2019
998	chr5_4663967	KJS05_002		5	4663967	Cheon et al. 2020
999	chr5_4783888	KJ05_013		5	4783888	Cheon et al. 2018
1000	chr5_4794565	SK05_4794565		5	4794565	Yang et al. 2019
1001	chr5_4819475	s05_4819475		5	4819475	Arbelaez et al. 2019
1002	chr5_4953754	s05_4953754		5	4953754	Arbelaez et al. 2019
1003	chr5_4984766	SK05_4984766		5	4984766	Yang et al. 2019
1004	chr5_5339085	SK05_5339085		5	5339085	Yang et al. 2019
1005	chr5_5341385	SK05_5341385		5	5341385	Yang et al. 2019
1006	chr5_5354416	KJ05_014		5	5354416	Cheon et al. 2019
1007	chr5_5360210	KJ05_015		5	5360210	Cheon et al. 2018
1008	chr5_5364311	SK05_5364311		5	5364311	Yang et al. 2019
1009	chr5_5396755	SK05_5396755		5	5396755	Yang et al. 2019
1010	chr5_5425895	SK05_5425895		5	5425895	Yang et al. 2019
1011	chr5_5427770	SK05_5427770		5	5427770	Yang et al. 2019
1012	chr5_5441846	SK05_5441846		5	5441846	Yang et al. 2019
1013	chr5_5445097	SK05_5445097		5	5445097	Yang et al. 2019
1014	chr5_5472427	KJ05_016		5	5472427	Cheon et al. 2019
1015	chr5_5537852	SK05_5537852		5	5537852	Yang et al. 2019
1016	chr5_5984919	KJ05_017		5	5984919	Cheon et al. 2018
1017	chr5_6109831	KJ05_018		5	6109831	Cheon et al. 2019
1018	chr5_6129755	s05_6129755		5	6129755	Arbelaez et al. 2019
1019	chr5_6544781	s05_6544781		5	6544781	Arbelaez et al. 2019
1020	chr5_6562635	KJ05_019		5	6562635	Cheon et al. 2018
1021	chr5_6607675	s05_6607675		5	6607675	Arbelaez et al. 2019
1022	chr5_6674203	KJ05_020		5	6674203	Cheon et al. 2019
1023	chr5_6707417	SK05_6707417		5	6707417	Yang et al. 2019
1024	chr5_6833061	s05_6833061		5	6833061	Arbelaez et al. 2019
1025	chr5_7040154	KJ05_021		5	7040154	Cheon et al. 2018
1026	chr5_7194845	KJ05_022		5	7194845	Cheon et al. 2019
1027	chr5_7195992	s05_7195992		5	7195992	Arbelaez et al. 2019
1028	chr5_7328783	s05_7328783		5	7328783	Arbelaez et al. 2019
1029	chr5_7392294	KJ05_023		5	7392294	Cheon et al. 2018
1030	chr5_7411452	SK05_7411452		5	7411452	Yang et al. 2019
1031	chr5_7706179	s05_7706179		5	7706179	Arbelaez et al. 2019
1032	chr5_7756614	KJ05_025		5	7756614	Cheon et al. 2018
1033	chr5_8021900	KJ05_026		5	8021900	Cheon et al. 2019
1034	chr5_8080666	s05_8080666		5	8080666	Arbelaez et al. 2019
1035	chr5_8384781	s05_8384781		5	8384781	Arbelaez et al. 2019
1036	chr5_8385270	SK05_8385270		5	8385270	Yang et al. 2019
1037	chr5_8585466	s05_8585466		5	8585466	Arbelaez et al. 2019
1038	chr5_9214505	SK05_9214505		5	9214505	Yang et al. 2019
1039	chr5_9316830	KJS05_007		5	9316830	Cheon et al. 2020
1040	chr5_9519668	KJS05_008		5	9519668	Cheon et al. 2020
1041	chr5_9712988	s05_9712988		5	9712988	Arbelaez et al. 2019
1042	chr5_10539124	s05_10539124		5	10539124	Arbelaez et al. 2019
1043	chr5_10886331	s05_10886331		5	10886331	Arbelaez et al. 2019
1044	chr5_11098186	KJ05_028		5	11098186	Cheon et al. 2019
1045	chr5_11679660	s05_11679660		5	11679660	Arbelaez et al. 2019
1046	chr5_12087975	KJS05_015		5	12087975	Cheon et al. 2020
1047	chr5_12458461	KJS05_016		5	12458461	Cheon et al. 2020
1048	chr5_12691869	KJ05_029		5	12691869	Cheon et al. 2018
1049	chr5_13046184	SK05_13046184		5	13046184	Yang et al. 2019
1050	chr5_13232318	KJS05_018		5	13232318	Cheon et al. 2020
1051	chr5_13325546	s05_13325546		5	13325546	Arbelaez et al. 2019
1052	chr5_13602020	KJS05_019		5	13602020	Cheon et al. 2020
1053	chr5_13768744	s05_13768744		5	13768744	Arbelaez et al. 2019
1054	chr5_14301919	SK05_14301919		5	14301919	Yang et al. 2019
1055	chr5_14412355	s05_14412355		5	14412355	Arbelaez et al. 2019
1056	chr5_14541042	KJS05_022		5	14541042	Cheon et al. 2020
1057	chr5_14643984	s05_14643984		5	14643984	Arbelaez et al. 2019
1058	chr5_14928105	s05_14928105		5	14928105	Arbelaez et al. 2019
1059	chr5_15317821	KJ05_030		5	15317821	Cheon et al. 2019
1060	chr5_15556017	SK05_15556017		5	15556017	Yang et al. 2019
1061	chr5_15567844	s05_15567844		5	15567844	Arbelaez et al. 2019
1062	chr5_16055903	s05_16055903		5	16055903	Arbelaez et al. 2019
1063	chr5_16262586	SK05_16262586		5	16262586	Yang et al. 2019
1064	chr5_16326736	KJ05_032		5	16326736	Cheon et al. 2019
1065	chr5_16500527	s05_16500527		5	16500527	Arbelaez et al. 2019
1066	chr5_16512716	SK05_16512716		5	16512716	Yang et al. 2019
1067	chr5_16752221	s05_16752221		5	16752221	Arbelaez et al. 2019
1068	chr5_16955234	s05_16955234		5	16955234	Arbelaez et al. 2019
1069	chr5_17017106	s05_17017106		5	17017106	Arbelaez et al. 2019
1070	chr5_17252517	KJ05_033		5	17252517	Cheon et al. 2018
1071	chr5_17371944	KJ05_034		5	17371944	Cheon et al. 2019
1072	chr5_17637398	KJ05_035		5	17637398	Cheon et al. 2018
1073	chr5_17830875	SK05_17830875		5	17830875	Yang et al. 2019
1074	chr5_17834629	KJ05_036		5	17834629	Cheon et al. 2019
1075	chr5_17887666	KGH05_005		5	17887666	Cheon et al. 2020
1076	chr5_18031950	KJ05_037		5	18031950	Cheon et al. 2018
1077	chr5_18108765	s05_18108765		5	18108765	Arbelaez et al. 2019
1078	chr5_18405433	s05_18405433		5	18405433	Arbelaez et al. 2019
1079	chr5_18443082	KJ05_038		5	18443082	Cheon et al. 2019
1080	chr5_18623022	KJ05_039		5	18623022	Cheon et al. 2018
1081	chr5_18816269	s05_18816269		5	18816269	Arbelaez et al. 2019
1082	chr5_18905370	KJ05_040		5	18905370	Cheon et al. 2019
1083	chr5_18986036	KJ05_041		5	18986036	Cheon et al. 2018
1084	chr5_19098650	s05_19098650		5	19098650	Arbelaez et al. 2019
1085	chr5_19155333	s05_19155333		5	19155333	Arbelaez et al. 2019
1086	chr5_19160084	SK05_19160084		5	19160084	Yang et al. 2019
1087	chr5_19480980	KJ05_042		5	19480980	Cheon et al. 2019
1088	chr5_19516545	s05_19516545		5	19516545	Arbelaez et al. 2019
1089	chr5_19521378	KJ05_043		5	19521378	Cheon et al. 2018
1090	chr5_19723342	s05_19723342		5	19723342	Arbelaez et al. 2019
1091	chr5_19893809	KJ05_044		5	19893809	Cheon et al. 2019
1092	chr5_19974373	s05_19974373		5	19974373	Arbelaez et al. 2019
1093	chr5_20331215	s05_20331215		5	20331215	Arbelaez et al. 2019
1094	chr5_20493787	SK05_20493787		5	20493787	Yang et al. 2019
1095	chr5_20551103	s05_20551103		5	20551103	Arbelaez et al. 2019
1096	chr5_20774465	KJ05_046		5	20774465	Cheon et al. 2019
1097	chr5_20785235	KJ05_047		5	20785235	Cheon et al. 2018
1098	chr5_21280487	KJS05_028		5	21280487	Cheon et al. 2020
1099	chr5_21494622	s05_21494622		5	21494622	Arbelaez et al. 2019
1100	chr5_21562338	SK05_21562338		5	21562338	Yang et al. 2019
1101	chr5_21567051	KJS05_029		5	21567051	Cheon et al. 2020
1102	chr5_21766289	KJ05_050		5	21766289	Cheon et al. 2019
1103	chr5_22075948	s05_22075948		5	22075948	Arbelaez et al. 2019
1104	chr5_22081477	KJ05_051		5	22081477	Cheon et al. 2018
1105	chr5_22295097	s05_22295097		5	22295097	Arbelaez et al. 2019
1106	chr5_22543984	SK05_22543984		5	22543984	Yang et al. 2019
1107	chr5_22711811	s05_22711811		5	22711811	Arbelaez et al. 2019
1108	chr5_22805256	KJ05_053		5	22805256	Cheon et al. 2018
1109	chr5_23143060	s05_23143060		5	23143060	Arbelaez et al. 2019
1110	chr5_23216295	KJ05_054		5	23216295	Cheon et al. 2019
1111	chr5_23661597	s05_23661597		5	23661597	Arbelaez et al. 2019
1112	chr5_23727191	KJ05_055		5	23727191	Cheon et al. 2018
1113	chr5_23733220	SK05_23733220		5	23733220	Yang et al. 2019
1114	chr5_23824618	s05_23824618		5	23824618	Arbelaez et al. 2019
1115	chr5_24020057	KJ05_056		5	24020057	Cheon et al. 2019
1116	chr5_24070572	SK05_24070572		5	24070572	Yang et al. 2019
1117	chr5_24090514	s05_24090514		5	24090514	Arbelaez et al. 2019
1118	chr5_24196872	KJ05_057		5	24196872	Cheon et al. 2018
1119	chr5_24231845	KJ05_058		5	24231845	Cheon et al. 2019
1120	chr5_24773184	KJ05_059		5	24773184	Cheon et al. 2018
1121	chr5_24999987	KJ05_060		5	24999987	Cheon et al. 2019
1122	chr5_25215570	SK05_25215570		5	25215570	Yang et al. 2019
1123	chr5_25234430	s05_25234430		5	25234430	Arbelaez et al. 2019
1124	chr5_25246244	KJ05_061		5	25246244	Cheon et al. 2018
1125	chr5_25852536	KJ05_063		5	25852536	Cheon et al. 2018
1126	chr5_25956535	KJ05_064		5	25956535	Cheon et al. 2019
1127	chr5_26029645	KJ05_065		5	26029645	Cheon et al. 2018
1128	chr5_26185802	s05_26185802		5	26185802	Arbelaez et al. 2019
1129	chr5_26260986	SK05_26260986		5	26260986	Yang et al. 2019
1130	chr5_26390859	KJ05_066		5	26390859	Cheon et al. 2019
1131	chr5_26813227	KJ05_067		5	26813227	Cheon et al. 2018
1132	chr5_27086886	s05_27086886		5	27086886	Arbelaez et al. 2019
1133	chr5_27289052	s05_27289052		5	27289052	Arbelaez et al. 2019
1134	chr5_27531788	s05_27531788		5	27531788	Arbelaez et al. 2019
1135	chr5_27627633	s05_27627633		5	27627633	Arbelaez et al. 2019
1136	chr5_27742506	SK05_27742506		5	27742506	Yang et al. 2019
1137	chr5_27795820	KJ05_071		5	27795820	Cheon et al. 2018
1138	chr5_27899049	s05_27899049		5	27899049	Arbelaez et al. 2019
1139	chr5_27944747	KJ05_072		5	27944747	Cheon et al. 2019
1140	chr5_28101376	s05_28101376		5	28101376	Arbelaez et al. 2019
1141	chr5_28344771	s05_28344771		5	28344771	Arbelaez et al. 2019
1142	chr5_28383107	KJ05_074		5	28383107	Cheon et al. 2019
1143	chr5_28560614	KJ05_075		5	28560614	Cheon et al. 2018
1144	chr5_28642522	s05_28642522		5	28642522	Arbelaez et al. 2019
1145	chr5_28718002	KJ05_076		5	28718002	Cheon et al. 2019
1146	chr5_28772543	s05_28772543		5	28772543	Arbelaez et al. 2019
1147	chr5_28816449	KJS05_030		5	28816449	Cheon et al. 2020
1148	chr5_28853059	KJS05_031		5	28853059	Cheon et al. 2020
1149	chr5_29017036	SK05_29017036		5	29017036	Yang et al. 2019
1150	chr5_29061672	s05_29061672		5	29061672	Arbelaez et al. 2019
1151	chr5_29100308	s05_29100308		5	29100308	Arbelaez et al. 2019
1152	chr5_29217223	KJS05_032		5	29217223	Cheon et al. 2020
1153	chr5_29490231	s05_29490231		5	29490231	Arbelaez et al. 2019
1154	chr5_29497783	SK05_29497783		5	29497783	Yang et al. 2019
1155	chr5_29590621	KJS05_033		5	29590621	Cheon et al. 2020
			5 개수	194
1156	chr6_244274	s06_244274		6	244274	Arbelaez et al. 2019
1157	chr6_382564	SK06_382564		6	382564	Yang et al. 2019
1158	chr6_395890	SK06_395890		6	395890	Yang et al. 2019
1159	chr6_400753	s06_400753		6	400753	Arbelaez et al. 2019
1160	chr6_454048	SK06_454048		6	454048	Yang et al. 2019
1161	chr6_637769	KJ06_004		6	637769	Cheon et al. 2019
1162	chr6_638510	SK06_638510		6	638510	Yang et al. 2019
1163	chr6_646915	s06_646915		6	646915	Arbelaez et al. 2019
1164	chr6_647869	SK06_647869		6	647869	Yang et al. 2019
1165	chr6_662221	SK06_662221		6	662221	Yang et al. 2019
1166	chr6_677288	s06_677288		6	677288	Arbelaez et al. 2019
1167	chr6_701439	SK06_701439		6	701439	Yang et al. 2019
1168	chr6_873670	SK06_873670		6	873670	Yang et al. 2019
1169	chr6_1038324	KJ06_005		6	1038324	Cheon et al. 2018
1170	chr6_1114863	KJ06_006		6	1114863	Cheon et al. 2019
1171	chr6_1266434	KJ06_007		6	1266434	Cheon et al. 2018
1172	chr6_1272777	s06_1272777		6	1272777	Arbelaez et al. 2019
1173	chr6_1349980	SK06_1349980		6	1349980	Yang et al. 2019
1174	chr6_1372731	SK06_1372731		6	1372731	Yang et al. 2019
1175	chr6_1378891	s06_1378891		6	1378891	Arbelaez et al. 2019
1176	chr6_1455037	KJS06_001		6	1455037	Cheon et al. 2020
1177	chr6_1471478	SK06_1471478		6	1471478	Yang et al. 2019
1178	chr6_1509884	SK06_1509884		6	1509884	Yang et al. 2019
1179	chr6_1521855	s06_1521855		6	1521855	Arbelaez et al. 2019
1180	chr6_1529726	SK06_1529726		6	1529726	Yang et al. 2019
1181	chr6_1586456	SK06_1586456		6	1586456	Yang et al. 2019
1182	chr6_1587473	SK06_1587473		6	1587473	Yang et al. 2019
1183	chr6_1594975	SK06_1594975		6	1594975	Yang et al. 2019
1184	chr6_1765761	SK06_1765761		6	1765761	Yang et al. 2019
1185	chr6_1768006	SK06_1768006		6	1768006	Yang et al. 2019
1186	chr6_1768997	SK06_1768997		6	1768997	Yang et al. 2019
1187	chr6_1768998	Wxa_Wxg2		6	1768998	Arbelaez et al. 2019
1188	chr6_1962294	SK06_1962294		6	1962294	Yang et al. 2019
1189	chr6_1975737	SK06_1975737		6	1975737	Yang et al. 2019
1190	chr6_2025629	s06_2025629		6	2025629	Arbelaez et al. 2019
1191	chr6_2099853	SK06_2099853		6	2099853	Yang et al. 2019
1192	chr6_2430760	s06_2430760		6	2430760	Arbelaez et al. 2019
1193	chr6_2438361	KJS06_003		6	2438361	Cheon et al. 2020
1194	chr6_2535102	s06_2535102		6	2535102	Arbelaez et al. 2019
1195	chr6_2751641	KJ06_008		6	2751641	Cheon et al. 2019
1196	chr6_2781588	SK06_2781588		6	2781588	Yang et al. 2019
1197	chr6_2783620	s06_2783620		6	2783620	Arbelaez et al. 2019
1198	chr6_2808467	s06_2808467		6	2808467	Arbelaez et al. 2019
1199	chr6_2936067	KJ06_009		6	2936067	Cheon et al. 2018
1200	chr6_3140863	s06_3140863		6	3140863	Arbelaez et al. 2019
1201	chr6_3244503	s06_3244503		6	3244503	Arbelaez et al. 2019
1202	chr6_3277562	KJ06_010		6	3277562	Cheon et al. 2019
1203	chr6_3300607	KGH06_001		6	3300607	Cheon et al. 2020
1204	chr6_3306874	KGH06_002		6	3306874	Cheon et al. 2020
1205	chr6_3365147	KJ06_011		6	3365147	Cheon et al. 2018
1206	chr6_3431721	s06_3431721		6	3431721	Arbelaez et al. 2019
1207	chr6_3571407	KJ06_012		6	3571407	Cheon et al. 2019
1208	chr6_3590969	SK06_3590969		6	3590969	Yang et al. 2019
1209	chr6_3598843	s06_3598843		6	3598843	Arbelaez et al. 2019
1210	chr6_3632725	s06_3632725		6	3632725	Arbelaez et al. 2019
1211	chr6_3721346	s06_3721346		6	3721346	Arbelaez et al. 2019
1212	chr6_3754113	KJ06_013		6	3754113	Cheon et al. 2018
1213	chr6_3951547	s06_3951547		6	3951547	Arbelaez et al. 2019
1214	chr6_3977139	KJ06_014		6	3977139	Cheon et al. 2019
1215	chr6_4022325	SK06_4022325		6	4022325	Yang et al. 2019
1216	chr6_4076903	s06_4076903		6	4076903	Arbelaez et al. 2019
1217	chr6_4212402	SK06_4212402		6	4212402	Yang et al. 2019
1218	chr6_4637190	SK06_4637190		6	4637190	Yang et al. 2019
1219	chr6_4641044	s06_4641044		6	4641044	Arbelaez et al. 2019
1220	chr6_4708665	KJ06_015		6	4708665	Cheon et al. 2018
1221	chr6_4737177	SK06_4737177		6	4737177	Yang et al. 2019
1222	chr6_4757948	s06_4757948		6	4757948	Arbelaez et al. 2019
1223	chr6_4795998	SK06_4795998		6	4795998	Yang et al. 2019
1224	chr6_4870556	SK06_4870556		6	4870556	Yang et al. 2019
1225	chr6_4887859	s06_4887859		6	4887859	Arbelaez et al. 2019
1226	chr6_4892296	SK06_4892296		6	4892296	Yang et al. 2019
1227	chr6_4930358	SK06_4930358		6	4930358	Yang et al. 2019
1228	chr6_5036025	SK06_5036025		6	5036025	Yang et al. 2019
1229	chr6_5167941	KGH06_003		6	5167941	Cheon et al. 2020
1230	chr6_5195334	s06_5195334		6	5195334	Arbelaez et al. 2019
1231	chr6_5299280	KJ06_016		6	5299280	Cheon et al. 2019
1232	chr6_5495783	KJ06_017		6	5495783	Cheon et al. 2018
1233	chr6_5612809	SK06_5612809		6	5612809	Yang et al. 2019
1234	chr6_5707236	s06_5707236		6	5707236	Arbelaez et al. 2019
1235	chr6_5731693	KJ06_018		6	5731693	Cheon et al. 2019
1236	chr6_5874707	SK06_5874707		6	5874707	Yang et al. 2019
1237	chr6_5911796	KJ06_019		6	5911796	Cheon et al. 2018
1238	chr6_6093491	s06_6093491		6	6093491	Arbelaez et al. 2019
1239	chr6_6478676	SK06_6478676		6	6478676	Yang et al. 2019
1240	chr6_6508525	s06_6508525		6	6508525	Arbelaez et al. 2019
1241	chr6_6635225	KJ06_022		6	6635225	Cheon et al. 2019
1242	chr6_6749313	SK06_6749313		6	6749313	Yang et al. 2019
1243	chr6_6752756	SK06_6752756		6	6752756	Yang et al. 2019
1244	chr6_6752887	SK06_6752887		6	6752887	Yang et al. 2019
1245	chr6_6770568	KJ06_023		6	6770568	Cheon et al. 2018
1246	chr6_7003213	SK06_7003213		6	7003213	Yang et al. 2019
1247	chr6_7019948	SK06_7019948		6	7019948	Yang et al. 2019
1248	chr6_7229106	KJ06_025		6	7229106	Cheon et al. 2018
1249	chr6_7435718	KJ06_026		6	7435718	Cheon et al. 2019
1250	chr6_7629011	s06_7629011		6	7629011	Arbelaez et al. 2019
1251	chr6_7670859	SK06_7670859		6	7670859	Yang et al. 2019
1252	chr6_7708089	KJ06_027		6	7708089	Cheon et al. 2018
1253	chr6_7822950	KJ06_028		6	7822950	Cheon et al. 2019
1254	chr6_7837648	KJ06_029		6	7837648	Cheon et al. 2018
1255	chr6_8153078	s06_8153078		6	8153078	Arbelaez et al. 2019
1256	chr6_8334407	KJ06_030		6	8334407	Cheon et al. 2019
1257	chr6_8405025	s06_8405025		6	8405025	Arbelaez et al. 2019
1258	chr6_8481127	KJ06_031		6	8481127	Cheon et al. 2018
1259	chr6_8937542	KGH06_005		6	8937542	Cheon et al. 2020
1260	chr6_9035697	KJ06_033		6	9035697	Cheon et al. 2018
1261	chr6_9138291	KJ06_034		6	9138291	Cheon et al. 2019
1262	chr6_9222038	s06_9222038		6	9222038	Arbelaez et al. 2019
1263	chr6_9271476	KJ06_035		6	9271476	Cheon et al. 2018
1264	chr6_9289417	KGH06_007		6	9289417	Cheon et al. 2020
1265	chr6_9338330	SK06_9338330		6	9338330	Yang et al. 2019
1266	chr6_9529669	KJ06_036		6	9529669	Cheon et al. 2019
1267	chr6_9566049	KGH06_008		6	9566049	Cheon et al. 2020
1268	chr6_9652784	SK06_9652784		6	9652784	Yang et al. 2019
1269	chr6_9836381	s06_9836381		6	9836381	Arbelaez et al. 2019
1270	chr6_10006906	s06_10006906		6	10006906	Arbelaez et al. 2019
1271	chr6_10279890	KGH06_009		6	10279890	Cheon et al. 2020
1272	chr6_10319632	KJ06_038		6	10319632	Cheon et al. 2019
1273	chr6_10388662	SK06_10388662		6	10388662	Yang et al. 2019
1274	chr6_10389729	SK06_10389729		6	10389729	Yang et al. 2019
1275	chr6_10437834	KJ06_039		6	10437834	Cheon et al. 2018
1276	chr6_10447926	KGH06_010		6	10447926	Cheon et al. 2020
1277	chr6_10780360	KJ06_040		6	10780360	Cheon et al. 2019
1278	chr6_10966744	s06_10966744		6	10966744	Arbelaez et al. 2019
1279	chr6_11131403	s06_11131403		6	11131403	Arbelaez et al. 2019
1280	chr6_11287473	SK06_11287473		6	11287473	Yang et al. 2019
1281	chr6_11692013	s06_11692013		6	11692013	Arbelaez et al. 2019
1282	chr6_11914008	KJ06_041		6	11914008	Cheon et al. 2018
1283	chr6_12191074	SK06_12191074		6	12191074	Yang et al. 2019
1284	chr6_12329977	KJS06_006		6	12329977	Cheon et al. 2020
1285	chr6_12772228	KJS06_008		6	12772228	Cheon et al. 2020
1286	chr6_12927975	KJ06_044		6	12927975	Cheon et al. 2019
1287	chr6_12988857	KJ06_045		6	12988857	Cheon et al. 2018
1288	chr6_12989252	s06_12989252		6	12989252	Arbelaez et al. 2019
1289	chr6_13056699	SK06_13056699		6	13056699	Yang et al. 2019
1290	chr6_13351589	KJ06_047		6	13351589	Cheon et al. 2018
1291	chr6_13501409	KGH06_011		6	13501409	Cheon et al. 2020
1292	chr6_13702743	s06_13702743		6	13702743	Arbelaez et al. 2019
1293	chr6_13715792	KGH06_012		6	13715792	Cheon et al. 2020
1294	chr6_13814825	KJ06_049		6	13814825	Cheon et al. 2018
1295	chr6_14006726	s06_14006726		6	14006726	Arbelaez et al. 2019
1296	chr6_14151281	KGH06_013		6	14151281	Cheon et al. 2020
1297	chr6_14504992	s06_14504992		6	14504992	Arbelaez et al. 2019
1298	chr6_14773434	KGH06_015		6	14773434	Cheon et al. 2020
1299	chr6_14939243	SK06_14939243		6	14939243	Yang et al. 2019
1300	chr6_15196594	KJ06_055		6	15196594	Cheon et al. 2018
1301	chr6_15358704	s06_15358704		6	15358704	Arbelaez et al. 2019
1302	chr6_15408817	KJ06_056		6	15408817	Cheon et al. 2019
1303	chr6_15538142	SK06_15538142		6	15538142	Yang et al. 2019
1304	chr6_16220700	KJ06_059		6	16220700	Cheon et al. 2018
1305	chr6_16304717	s06_16304717		6	16304717	Arbelaez et al. 2019
1306	chr6_16417487	SK06_16417487		6	16417487	Yang et al. 2019
1307	chr6_16429856	KGH06_017		6	16429856	Cheon et al. 2020
1308	chr6_16440691	KGH06_018		6	16440691	Cheon et al. 2020
1309	chr6_16507688	KGH06_019		6	16507688	Cheon et al. 2020
1310	chr6_16609478	KJ06_061		6	16609478	Cheon et al. 2018
1311	chr6_16614854	SK06_16614854		6	16614854	Yang et al. 2019
1312	chr6_16806254	s06_16806254		6	16806254	Arbelaez et al. 2019
1313	chr6_16865337	KJ06_062		6	16865337	Cheon et al. 2019
1314	chr6_17005893	KGH06_020		6	17005893	Cheon et al. 2020
1315	chr6_17076390	s06_17076390		6	17076390	Arbelaez et al. 2019
1316	chr6_17163218	SK06_17163218		6	17163218	Yang et al. 2019
1317	chr6_17285715	KGH06_021		6	17285715	Cheon et al. 2020
1318	chr6_17698448	s06_17698448		6	17698448	Arbelaez et al. 2019
1319	chr6_17875066	KJ06_064		6	17875066	Cheon et al. 2019
1320	chr6_18066193	KGH06_022		6	18066193	Cheon et al. 2020
1321	chr6_18163084	KGH06_023		6	18163084	Cheon et al. 2020
1322	chr6_18746527	KJ06_066		6	18746527	Cheon et al. 2019
1323	chr6_19101835	KGH06_024		6	19101835	Cheon et al. 2020
1324	chr6_19182748	KJ06_067		6	19182748	Cheon et al. 2018
1325	chr6_19462276	s06_19462276		6	19462276	Arbelaez et al. 2019
1326	chr6_19665735	SK06_19665735		6	19665735	Yang et al. 2019
1327	chr6_19783820	KJ06_068		6	19783820	Cheon et al. 2019
1328	chr6_19989362	s06_19989362		6	19989362	Arbelaez et al. 2019
1329	chr6_20282850	KGH06_026		6	20282850	Cheon et al. 2020
1330	chr6_20462203	s06_20462203		6	20462203	Arbelaez et al. 2019
1331	chr6_20551516	KJS06_009		6	20551516	Cheon et al. 2020
1332	chr6_20800091	KJS06_010		6	20800091	Cheon et al. 2020
1333	chr6_20950922	SK06_20950922		6	20950922	Yang et al. 2019
1334	chr6_20976276	KJS06_011		6	20976276	Cheon et al. 2020
1335	chr6_21246829	s06_21246829		6	21246829	Arbelaez et al. 2019
1336	chr6_21491695	s06_21491695		6	21491695	Arbelaez et al. 2019
1337	chr6_21537543	KJS06_012		6	21537543	Cheon et al. 2020
1338	chr6_21690712	KJ06_070		6	21690712	Cheon et al. 2019
1339	chr6_21799623	KJ06_071		6	21799623	Cheon et al. 2018
1340	chr6_21818860	s06_21818860		6	21818860	Arbelaez et al. 2019
1341	chr6_22115798	KJ06_072		6	22115798	Cheon et al. 2019
1342	chr6_22155057	SK06_22155057		6	22155057	Yang et al. 2019
1343	chr6_22306256	KJ06_073		6	22306256	Cheon et al. 2018
1344	chr6_22371041	s06_22371041		6	22371041	Arbelaez et al. 2019
1345	chr6_22536653	KJ06_074		6	22536653	Cheon et al. 2019
1346	chr6_22670232	SK06_22670232		6	22670232	Yang et al. 2019
1347	chr6_22769496	KJ06_075		6	22769496	Cheon et al. 2018
1348	chr6_22952048	SK06_22952048		6	22952048	Yang et al. 2019
1349	chr6_23836891	KJ06_077		6	23836891	Cheon et al. 2018
1350	chr6_23854416	SK06_23854416		6	23854416	Yang et al. 2019
1351	chr6_23960981	KJ06_078		6	23960981	Cheon et al. 2019
1352	chr6_24003856	s06_24003856		6	24003856	Arbelaez et al. 2019
1353	chr6_24219798	s06_24219798		6	24219798	Arbelaez et al. 2019
1354	chr6_24268236	KJS06_013		6	24268236	Cheon et al. 2020
1355	chr6_24331932	s06_24331932		6	24331932	Arbelaez et al. 2019
1356	chr6_24502000	s06_24502000		6	24502000	Arbelaez et al. 2019
1357	chr6_24682553	KJS06_015		6	24682553	Cheon et al. 2020
1358	chr6_24997051	KJ06_079		6	24997051	Cheon et al. 2018
1359	chr6_25033082	SK06_25033082		6	25033082	Yang et al. 2019
1360	chr6_25203744	SK06_25203744		6	25203744	Yang et al. 2019
1361	chr6_25277863	s06_25277863		6	25277863	Arbelaez et al. 2019
1362	chr6_25433672	KJ06_080		6	25433672	Cheon et al. 2019
1363	chr6_25434460	s06_25434460		6	25434460	Arbelaez et al. 2019
1364	chr6_25793346	KJ06_081		6	25793346	Cheon et al. 2018
1365	chr6_26139965	s06_26139965		6	26139965	Arbelaez et al. 2019
1366	chr6_26266828	SK06_26266828		6	26266828	Yang et al. 2019
1367	chr6_26513610	s06_26513610		6	26513610	Arbelaez et al. 2019
1368	chr6_26747288	KJS06_017		6	26747288	Cheon et al. 2020
1369	chr6_26938344	Xa7_01		6	26938344	Arbelaez et al. 2019
1370	chr6_27209983	KJS06_019		6	27209983	Cheon et al. 2020
1371	chr6_27275515	s06_27275515		6	27275515	Arbelaez et al. 2019
1372	chr6_27326725	SK06_27326725		6	27326725	Yang et al. 2019
1373	chr6_27364485	s06_27364485		6	27364485	Arbelaez et al. 2019
1374	chr6_27368248	SK06_27368248		6	27368248	Yang et al. 2019
1375	chr6_27423294	KJS06_020		6	27423294	Cheon et al. 2020
1376	chr6_27438624	SK06_27438624		6	27438624	Yang et al. 2019
1377	chr6_27481339	SK06_27481339		6	27481339	Yang et al. 2019
1378	chr6_27498819	SK06_27498819		6	27498819	Yang et al. 2019
1379	chr6_27526542	SK06_27526542		6	27526542	Yang et al. 2019
1380	chr6_27526729	SK06_27526729		6	27526729	Yang et al. 2019
1381	chr6_27627615	SK06_27627615		6	27627615	Yang et al. 2019
1382	chr6_27761109	s06_27761109		6	27761109	Arbelaez et al. 2019
1383	chr6_28100960	s06_28100960		6	28100960	Arbelaez et al. 2019
1384	chr6_28107682	Xa7_05		6	28107682	Arbelaez et al. 2019
1385	chr6_28109159	SK06_28109159		6	28109159	Yang et al. 2019
1386	chr6_28201282	s06_28201282		6	28201282	Arbelaez et al. 2019
1387	chr6_28723997	s06_28723997		6	28723997	Arbelaez et al. 2019
1388	chr6_28796789	SK06_28796789		6	28796789	Yang et al. 2019
1389	chr6_28800531	SK06_28800531		6	28800531	Yang et al. 2019
1390	chr6_28871380	SK06_28871380		6	28871380	Yang et al. 2019
1391	chr6_28873249	SK06_28873249		6	28873249	Yang et al. 2019
1392	chr6_28879041	SK06_28879041		6	28879041	Yang et al. 2019
1393	chr6_28999672	SK06_28999672		6	28999672	Yang et al. 2019
1394	chr6_29000232	SK06_29000232		6	29000232	Yang et al. 2019
1395	chr6_29179807	KJ06_082		6	29179807	Cheon et al. 2019
1396	chr6_29208264	SK06_29208264		6	29208264	Yang et al. 2019
1397	chr6_29416997	s06_29416997		6	29416997	Arbelaez et al. 2019
1398	chr6_29648332	s06_29648332		6	29648332	Arbelaez et al. 2019
1399	chr6_29960908	KJ06_083		6	29960908	Cheon et al. 2018
1400	chr6_30176430	SK06_30176430		6	30176430	Yang et al. 2019
1401	chr6_30402598	KJ06_084		6	30402598	Cheon et al. 2019
1402	chr6_30809492	SK06_30809492		6	30809492	Yang et al. 2019
			6 개수	247
1403	chr7_3980	KJ07_001		7	3980	Cheon et al. 2018
1404	chr7_183081	KGH07_001		7	183081	Cheon et al. 2020
1405	chr7_184193	s07_184193		7	184193	Arbelaez et al. 2019
1406	chr7_216333	KJ07_002		7	216333	Cheon et al. 2019
1407	chr7_289217	KJ07_003		7	289217	Cheon et al. 2018
1408	chr7_472805	SK07_472805		7	472805	Yang et al. 2019
1409	chr7_514293	s07_514293		7	514293	Arbelaez et al. 2019
1410	chr7_770090	s07_770090		7	770090	Arbelaez et al. 2019
1411	chr7_866524	KJ07_004		7	866524	Cheon et al. 2019
1412	chr7_928984	KJ07_005		7	928984	Cheon et al. 2018
1413	chr7_940832	s07_940832		7	940832	Arbelaez et al. 2019
1414	chr7_1058718	s07_1058718		7	1058718	Arbelaez et al. 2019
1415	chr7_1113524	KJ07_006		7	1113524	Cheon et al. 2019
1416	chr7_1195861	s07_1195861		7	1195861	Arbelaez et al. 2019
1417	chr7_1317761	s07_1317761		7	1317761	Arbelaez et al. 2019
1418	chr7_1317768	KJ07_007		7	1317768	Cheon et al. 2018
1419	chr7_1432567	s07_1432567		7	1432567	Arbelaez et al. 2019
1420	chr7_1558687	s07_1558687		7	1558687	Arbelaez et al. 2019
1421	chr7_1611002	KJ07_008		7	1611002	Cheon et al. 2019
1422	chr7_1865306	s07_1865306		7	1865306	Arbelaez et al. 2019
1423	chr7_1867588	SK07_1867588		7	1867588	Yang et al. 2019
1424	chr7_2025847	KJ07_010		7	2025847	Cheon et al. 2019
1425	chr7_2128881	s07_2128881		7	2128881	Arbelaez et al. 2019
1426	chr7_2277644	KJ07_011		7	2277644	Cheon et al. 2018
1427	chr7_2331583	s07_2331583		7	2331583	Arbelaez et al. 2019
1428	chr7_2682973	KJ07_012		7	2682973	Cheon et al. 2019
1429	chr7_2749068	KJ07_013		7	2749068	Cheon et al. 2018
1430	chr7_3108600	KJ07_014		7	3108600	Cheon et al. 2019
1431	chr7_3190324	KGH07_003		7	3190324	Cheon et al. 2020
1432	chr7_3300456	KJ07_015		7	3300456	Cheon et al. 2018
1433	chr7_3431101	SK07_3431101		7	3431101	Yang et al. 2019
1434	chr7_3510553	KJ07_016		7	3510553	Cheon et al. 2019
1435	chr7_3616857	s07_3616857		7	3616857	Arbelaez et al. 2019
1436	chr7_3705757	KJ07_017		7	3705757	Cheon et al. 2018
1437	chr7_3789086	KJ07_018		7	3789086	Cheon et al. 2019
1438	chr7_4239741	KJ07_019		7	4239741	Cheon et al. 2018
1439	chr7_4448493	KJ07_020		7	4448493	Cheon et al. 2019
1440	chr7_4644793	KJ07_021		7	4644793	Cheon et al. 2018
1441	chr7_4770598	KJ07_022		7	4770598	Cheon et al. 2019
1442	chr7_5205982	KJS07_001		7	5205982	Cheon et al. 2020
1443	chr7_5442983	s07_5442983		7	5442983	Arbelaez et al. 2019
1444	chr7_5729056	s07_5729056		7	5729056	Arbelaez et al. 2019
1445	chr7_5895703	KJS07_003		7	5895703	Cheon et al. 2020
1446	chr7_5973717	SK07_5973717		7	5973717	Yang et al. 2019
1447	chr7_6029723	s07_6029723		7	6029723	Arbelaez et al. 2019
1448	chr7_6720823	KJ07_023		7	6720823	Cheon et al. 2018
1449	chr7_6991402	SK07_6991402		7	6991402	Yang et al. 2019
1450	chr7_7036726	KJ07_024		7	7036726	Cheon et al. 2019
1451	chr7_7317122	s07_7317122		7	7317122	Arbelaez et al. 2019
1452	chr7_7431843	KJ07_026		7	7431843	Cheon et al. 2019
1453	chr7_7951167	KGH07_004		7	7951167	Cheon et al. 2020
1454	chr7_8140854	s07_8140854		7	8140854	Arbelaez et al. 2019
1455	chr7_8320872	s07_8320872		7	8320872	Arbelaez et al. 2019
1456	chr7_8487862	s07_8487862		7	8487862	Arbelaez et al. 2019
1457	chr7_8546130	SK07_8546130		7	8546130	Yang et al. 2019
1458	chr7_8918567	KJ07_028		7	8918567	Cheon et al. 2019
1459	chr7_9147667	KJ07_029		7	9147667	Cheon et al. 2018
1460	chr7_9324798	KJ07_030		7	9324798	Cheon et al. 2019
1461	chr7_10088239	KJS07_007		7	10088239	Cheon et al. 2020
1462	chr7_10654969	KJS07_010		7	10654969	Cheon et al. 2020
1463	chr7_10865813	KJS07_011		7	10865813	Cheon et al. 2020
1464	chr7_11030430	KJ07_033		7	11030430	Cheon et al. 2018
1465	chr7_11052704	KJ07_034		7	11052704	Cheon et al. 2019
1466	chr7_11290725	s07_11290725		7	11290725	Arbelaez et al. 2019
1467	chr7_11294662	KJS07_012		7	11294662	Cheon et al. 2020
1468	chr7_11590149	KJS07_013		7	11590149	Cheon et al. 2020
1469	chr7_11777418	KJS07_014		7	11777418	Cheon et al. 2020
1470	chr7_11876978	KJS07_015		7	11876978	Cheon et al. 2020
1471	chr7_12740701	KJS07_018		7	12740701	Cheon et al. 2020
1472	chr7_12903072	KJS07_019		7	12903072	Cheon et al. 2020
1473	chr7_13324721	KGH07_005		7	13324721	Cheon et al. 2020
1474	chr7_13501565	KJS07_021		7	13501565	Cheon et al. 2020
1475	chr7_13701611	KJS07_022		7	13701611	Cheon et al. 2020
1476	chr7_13776155	SK07_13776155		7	13776155	Yang et al. 2019
1477	chr7_14432880	KJ07_037		7	14432880	Cheon et al. 2018
1478	chr7_14729119	s07_14729119		7	14729119	Arbelaez et al. 2019
1479	chr7_14739487	KJ07_038		7	14739487	Cheon et al. 2019
1480	chr7_15311521	KJ07_039		7	15311521	Cheon et al. 2018
1481	chr7_15340454	s07_15340454		7	15340454	Arbelaez et al. 2019
1482	chr7_15512750	KJ07_040		7	15512750	Cheon et al. 2019
1483	chr7_15712796	KJ07_041		7	15712796	Cheon et al. 2018
1484	chr7_15912596	KJ07_042		7	15912596	Cheon et al. 2019
1485	chr7_16023116	KJ07_043		7	16023116	Cheon et al. 2018
1486	chr7_16118477	KJ07_044		7	16118477	Cheon et al. 2019
1487	chr7_16313631	s07_16313631		7	16313631	Arbelaez et al. 2019
1488	chr7_16761823	KJ07_045		7	16761823	Cheon et al. 2018
1489	chr7_16957375	SK07_16957375		7	16957375	Yang et al. 2019
1490	chr7_16961376	KJ07_046		7	16961376	Cheon et al. 2019
1491	chr7_17277936	KJ07_047		7	17277936	Cheon et al. 2018
1492	chr7_17553044	KJ07_048		7	17553044	Cheon et al. 2019
1493	chr7_17654305	s07_17654305		7	17654305	Arbelaez et al. 2019
1494	chr7_17762865	KJ07_049		7	17762865	Cheon et al. 2018
1495	chr7_17877865	s07_17877865		7	17877865	Arbelaez et al. 2019
1496	chr7_17883910	KGH07_006		7	17883910	Cheon et al. 2020
1497	chr7_17957356	KJ07_050		7	17957356	Cheon et al. 2019
1498	chr7_18168615	KJ07_051		7	18168615	Cheon et al. 2018
1499	chr7_18208798	s07_18208798		7	18208798	Arbelaez et al. 2019
1500	chr7_18503646	SK07_18503646		7	18503646	Yang et al. 2019
1501	chr7_18689329	s07_18689329		7	18689329	Arbelaez et al. 2019
1502	chr7_18700679	KJ07_053		7	18700679	Cheon et al. 2018
1503	chr7_18895399	s07_18895399		7	18895399	Arbelaez et al. 2019
1504	chr7_18895470	KJ07_054		7	18895470	Cheon et al. 2019
1505	chr7_18927936	SK07_18927936		7	18927936	Yang et al. 2019
1506	chr7_19696332	KJ07_057		7	19696332	Cheon et al. 2018
1507	chr7_19741549	KGH07_007		7	19741549	Cheon et al. 2020
1508	chr7_19929771	KJ07_058		7	19929771	Cheon et al. 2019
1509	chr7_20124410	KJ07_059		7	20124410	Cheon et al. 2018
1510	chr7_20514892	s07_20514892		7	20514892	Arbelaez et al. 2019
1511	chr7_20648508	KJ07_060		7	20648508	Cheon et al. 2019
1512	chr7_20728990	KJ07_061		7	20728990	Cheon et al. 2018
1513	chr7_20809098	s07_20809098		7	20809098	Arbelaez et al. 2019
1514	chr7_21096419	KJ07_062		7	21096419	Cheon et al. 2019
1515	chr7_21104616	KGH07_008		7	21104616	Cheon et al. 2020
1516	chr7_21135004	s07_21135004		7	21135004	Arbelaez et al. 2019
1517	chr7_21280092	SK07_21280092		7	21280092	Yang et al. 2019
1518	chr7_21293691	KGH07_009		7	21293691	Cheon et al. 2020
1519	chr7_21345932	KGH07_010		7	21345932	Cheon et al. 2020
1520	chr7_21367800	KJ07_063		7	21367800	Cheon et al. 2018
1521	chr7_21385114	KGH07_011		7	21385114	Cheon et al. 2020
1522	chr7_21539524	s07_21539524		7	21539524	Arbelaez et al. 2019
1523	chr7_21671752	KGH07_012		7	21671752	Cheon et al. 2020
1524	chr7_21848848	s07_21848848		7	21848848	Arbelaez et al. 2019
1525	chr7_22057564	SK07_22057564		7	22057564	Yang et al. 2019
1526	chr7_22119347	RSTV1_01		7	22119347	Arbelaez et al. 2019
1527	chr7_22196332	KJ07_066		7	22196332	Cheon et al. 2019
1528	chr7_22277144	s07_22277144		7	22277144	Arbelaez et al. 2019
1529	chr7_22377948	KJ07_067		7	22377948	Cheon et al. 2018
1530	chr7_22593213	SK07_22593213		7	22593213	Yang et al. 2019
1531	chr7_22724630	KJ07_068		7	22724630	Cheon et al. 2019
1532	chr7_22811363	s07_22811363		7	22811363	Arbelaez et al. 2019
1533	chr7_23087994	s07_23087994		7	23087994	Arbelaez et al. 2019
1534	chr7_23471376	KJ07_069		7	23471376	Cheon et al. 2018
1535	chr7_23535052	s07_23535052		7	23535052	Arbelaez et al. 2019
1536	chr7_23785728	s07_23785728		7	23785728	Arbelaez et al. 2019
1537	chr7_23967813	KJ07_070		7	23967813	Cheon et al. 2019
1538	chr7_24026475	s07_24026475		7	24026475	Arbelaez et al. 2019
1539	chr7_24146716	KJ07_071		7	24146716	Cheon et al. 2018
1540	chr7_24313817	s07_24313817		7	24313817	Arbelaez et al. 2019
1541	chr7_24507157	s07_24507157		7	24507157	Arbelaez et al. 2019
1542	chr7_24575395	KGH07_013		7	24575395	Cheon et al. 2020
1543	chr7_24636588	s07_24636588		7	24636588	Arbelaez et al. 2019
1544	chr7_24653396	SK07_24653396		7	24653396	Yang et al. 2019
1545	chr7_24674898	KJ07_073		7	24674898	Cheon et al. 2018
1546	chr7_24775370	KJ07_074		7	24775370	Cheon et al. 2019
1547	chr7_24845026	SK07_24845026		7	24845026	Yang et al. 2019
1548	chr7_24968707	KJ07_075		7	24968707	Cheon et al. 2018
1549	chr7_25132131	KJ07_076		7	25132131	Cheon et al. 2019
1550	chr7_25319809	SK07_25319809		7	25319809	Yang et al. 2019
1551	chr7_25327472	KGH07_015		7	25327472	Cheon et al. 2020
1552	chr7_25339609	s07_25339609		7	25339609	Arbelaez et al. 2019
1553	chr7_25365395	SK07_25365395		7	25365395	Yang et al. 2019
1554	chr7_25381724	SK07_25381724		7	25381724	Yang et al. 2019
1555	chr7_25520705	KGH07_016		7	25520705	Cheon et al. 2020
1556	chr7_25647896	KJ07_078		7	25647896	Cheon et al. 2019
1557	chr7_25935801	s07_25935801		7	25935801	Arbelaez et al. 2019
1558	chr7_26092398	KJS07_027		7	26092398	Cheon et al. 2020
1559	chr7_26502762	SK07_26502762		7	26502762	Yang et al. 2019
1560	chr7_26611324	SK07_26611324		7	26611324	Yang et al. 2019
1561	chr7_26963593	KGH07_017		7	26963593	Cheon et al. 2020
1562	chr7_27021585	s07_27021585		7	27021585	Arbelaez et al. 2019
1563	chr7_27244224	KJS07_029		7	27244224	Cheon et al. 2020
1564	chr7_27883987	s07_27883987		7	27883987	Arbelaez et al. 2019
1565	chr7_27960534	KJ07_080		7	27960534	Cheon et al. 2019
1566	chr7_28091875	KJ07_081		7	28091875	Cheon et al. 2018
1567	chr7_28187994	s07_28187994		7	28187994	Arbelaez et al. 2019
1568	chr7_28197301	SK07_28197301		7	28197301	Yang et al. 2019
1569	chr7_28377055	KJ07_082		7	28377055	Cheon et al. 2019
1570	chr7_28409912	s07_28409912		7	28409912	Arbelaez et al. 2019
1571	chr7_29062014	s07_29062014		7	29062014	Arbelaez et al. 2019
1572	chr7_29318430	KJ07_084		7	29318430	Cheon et al. 2019
1573	chr7_29529536	KJ07_085		7	29529536	Cheon et al. 2018
			7 개수	171
1574	chr8_213580	s08_213580		8	213580	Arbelaez et al. 2019
1575	chr8_269238	KGH08_001		8	269238	Cheon et al. 2020
1576	chr8_528441	s08_528441		8	528441	Arbelaez et al. 2019
1577	chr8_658032	s08_658032		8	658032	Arbelaez et al. 2019
1578	chr8_730526	SK08_730526		8	730526	Yang et al. 2019
1579	chr8_811201	s08_811201		8	811201	Arbelaez et al. 2019
1580	chr8_927616	SK08_927616		8	927616	Yang et al. 2019
1581	chr8_1044621	KJ08_002		8	1044621	Cheon et al. 2019
1582	chr8_1088007	s08_1088007		8	1088007	Arbelaez et al. 2019
1583	chr8_1198055	s08_1198055		8	1198055	Arbelaez et al. 2019
1584	chr8_1282290	KJ08_003		8	1282290	Cheon et al. 2018
1585	chr8_1287293	KGH08_002		8	1287293	Cheon et al. 2020
1586	chr8_1670756	KJ08_004		8	1670756	Cheon et al. 2019
1587	chr8_1836529	s08_1836529		8	1836529	Arbelaez et al. 2019
1588	chr8_2107949	KJ08_007		8	2107949	Cheon et al. 2018
1589	chr8_2208785	s08_2208785		8	2208785	Arbelaez et al. 2019
1590	chr8_2479524	KJ08_008		8	2479524	Cheon et al. 2019
1591	chr8_2523368	KJ08_009		8	2523368	Cheon et al. 2018
1592	chr8_2673447	s08_2673447		8	2673447	Arbelaez et al. 2019
1593	chr8_2890468	SK08_2890468		8	2890468	Yang et al. 2019
1594	chr8_2940939	KJ08_011		8	2940939	Cheon et al. 2018
1595	chr8_3212821	s08_3212821		8	3212821	Arbelaez et al. 2019
1596	chr8_3275444	KJ08_012		8	3275444	Cheon et al. 2019
1597	chr8_3339157	KJ08_013		8	3339157	Cheon et al. 2018
1598	chr8_3365127	s08_3365127		8	3365127	Arbelaez et al. 2019
1599	chr8_3528585	KJ08_014		8	3528585	Cheon et al. 2019
1600	chr8_3682006	s08_3682006		8	3682006	Arbelaez et al. 2019
1601	chr8_3700395	KJ08_015		8	3700395	Cheon et al. 2018
1602	chr8_3702914	SK08_3702914		8	3702914	Yang et al. 2019
1603	chr8_3866523	s08_3866523		8	3866523	Arbelaez et al. 2019
1604	chr8_3976061	KJ08_016		8	3976061	Cheon et al. 2019
1605	chr8_3988029	KGH08_003		8	3988029	Cheon et al. 2020
1606	chr8_4097511	KJ08_017		8	4097511	Cheon et al. 2018
1607	chr8_4190544	s08_4190544		8	4190544	Arbelaez et al. 2019
1608	chr8_4511882	s08_4511882		8	4511882	Arbelaez et al. 2019
1609	chr8_4557652	SK08_4557652		8	4557652	Yang et al. 2019
1610	chr8_4732019	SK08_4732019		8	4732019	Yang et al. 2019
1611	chr8_4755855	KJ08_019		8	4755855	Cheon et al. 2018
1612	chr8_4853081	s08_4853081		8	4853081	Arbelaez et al. 2019
1613	chr8_5082883	s08_5082883		8	5082883	Arbelaez et al. 2019
1614	chr8_5136182	SK08_5136182		8	5136182	Yang et al. 2019
1615	chr8_5140824	SK08_5140824		8	5140824	Yang et al. 2019
1616	chr8_5172167	KJ08_020		8	5172167	Cheon et al. 2019
1617	chr8_5319168	KGH08_004		8	5319168	Cheon et al. 2020
1618	chr8_5371341	KJ08_021		8	5371341	Cheon et al. 2018
1619	chr8_5383178	KGH08_005		8	5383178	Cheon et al. 2020
1620	chr8_5394572	s08_5394572		8	5394572	Arbelaez et al. 2019
1621	chr8_5577588	KGH08_006		8	5577588	Cheon et al. 2020
1622	chr8_5601170	KJ08_022		8	5601170	Cheon et al. 2019
1623	chr8_5634800	s08_5634800		8	5634800	Arbelaez et al. 2019
1624	chr8_5681862	KGH08_007		8	5681862	Cheon et al. 2020
1625	chr8_5754369	SK08_5754369		8	5754369	Yang et al. 2019
1626	chr8_5786550	KJ08_023		8	5786550	Cheon et al. 2018
1627	chr8_6057127	KGH08_008		8	6057127	Cheon et al. 2020
1628	chr8_6068261	KJ08_024		8	6068261	Cheon et al. 2019
1629	chr8_6204862	KJ08_025		8	6204862	Cheon et al. 2018
1630	chr8_6269190	s08_6269190		8	6269190	Arbelaez et al. 2019
1631	chr8_6404031	KJ08_026		8	6404031	Cheon et al. 2019
1632	chr8_6765057	KJ08_028		8	6765057	Cheon et al. 2019
1633	chr8_7135930	SK08_7135930		8	7135930	Yang et al. 2019
1634	chr8_7263851	KJ08_030		8	7263851	Cheon et al. 2019
1635	chr8_7549599	s08_7549599		8	7549599	Arbelaez et al. 2019
1636	chr8_7550250	KGH08_009		8	7550250	Cheon et al. 2020
1637	chr8_7686809	KJ08_032		8	7686809	Cheon et al. 2019
1638	chr8_7694157	KGH08_010		8	7694157	Cheon et al. 2020
1639	chr8_7711263	KGH08_011		8	7711263	Cheon et al. 2020
1640	chr8_7760906	KGH08_012		8	7760906	Cheon et al. 2020
1641	chr8_7778741	KGH08_013		8	7778741	Cheon et al. 2020
1642	chr8_7854002	s08_7854002		8	7854002	Arbelaez et al. 2019
1643	chr8_8332647	KJ08_035		8	8332647	Cheon et al. 2018
1644	chr8_8386031	s08_8386031		8	8386031	Arbelaez et al. 2019
1645	chr8_8504536	KJ08_036		8	8504536	Cheon et al. 2019
1646	chr8_8580913	s08_8580913		8	8580913	Arbelaez et al. 2019
1647	chr8_8703041	s08_8703041		8	8703041	Arbelaez et al. 2019
1648	chr8_8813868	KGH08_015		8	8813868	Cheon et al. 2020
1649	chr8_8846356	KJ08_037		8	8846356	Cheon et al. 2018
1650	chr8_8897653	s08_8897653		8	8897653	Arbelaez et al. 2019
1651	chr8_9004923	KJ08_038		8	9004923	Cheon et al. 2019
1652	chr8_9203557	SK08_9203557		8	9203557	Yang et al. 2019
1653	chr8_9400516	s08_9400516		8	9400516	Arbelaez et al. 2019
1654	chr8_9488704	KJ08_040		8	9488704	Cheon et al. 2019
1655	chr8_9510603	KGH08_016		8	9510603	Cheon et al. 2020
1656	chr8_9769758	s08_9769758		8	9769758	Arbelaez et al. 2019
1657	chr8_10105233	s08_10105233		8	10105233	Arbelaez et al. 2019
1658	chr8_10188041	s08_10188041		8	10188041	Arbelaez et al. 2019
1659	chr8_10216974	KJ08_043		8	10216974	Cheon et al. 2018
1660	chr8_10273969	KJ08_044		8	10273969	Cheon et al. 2019
1661	chr8_10358484	SK08_10358484		8	10358484	Yang et al. 2019
1662	chr8_10453731	KGH08_019		8	10453731	Cheon et al. 2020
1663	chr8_10499283	KJ08_045		8	10499283	Cheon et al. 2018
1664	chr8_10926383	KGH08_020		8	10926383	Cheon et al. 2020
1665	chr8_11065511	KJ08_046		8	11065511	Cheon et al. 2019
1666	chr8_11248949	s08_11248949		8	11248949	Arbelaez et al. 2019
1667	chr8_11369197	KJ08_048		8	11369197	Cheon et al. 2019
1668	chr8_11370680	s08_11370680		8	11370680	Arbelaez et al. 2019
1669	chr8_11510855	KGH08_021		8	11510855	Cheon et al. 2020
1670	chr8_11565636	s08_11565636		8	11565636	Arbelaez et al. 2019
1671	chr8_11622925	KJ08_049		8	11622925	Cheon et al. 2018
1672	chr8_11707115	SK08_11707115		8	11707115	Yang et al. 2019
1673	chr8_11727432	s08_11727432		8	11727432	Arbelaez et al. 2019
1674	chr8_11869322	KJ08_050		8	11869322	Cheon et al. 2019
1675	chr8_11888511	s08_11888511		8	11888511	Arbelaez et al. 2019
1676	chr8_11981330	KGH08_022		8	11981330	Cheon et al. 2020
1677	chr8_12145970	s08_12145970		8	12145970	Arbelaez et al. 2019
1678	chr8_12276749	KJ08_052		8	12276749	Cheon et al. 2019
1679	chr8_12421145	s08_12421145		8	12421145	Arbelaez et al. 2019
1680	chr8_12459153	KJ08_053		8	12459153	Cheon et al. 2018
1681	chr8_12723619	s08_12723619		8	12723619	Arbelaez et al. 2019
1682	chr8_12914215	KJ08_055		8	12914215	Cheon et al. 2018
1683	chr8_12914511	KGH08_023		8	12914511	Cheon et al. 2020
1684	chr8_13017690	s08_13017690		8	13017690	Arbelaez et al. 2019
1685	chr8_13057016	SK08_13057016		8	13057016	Yang et al. 2019
1686	chr8_13354771	s08_13354771		8	13354771	Arbelaez et al. 2019
1687	chr8_13735599	KJ08_058		8	13735599	Cheon et al. 2019
1688	chr8_13741571	s08_13741571		8	13741571	Arbelaez et al. 2019
1689	chr8_13990791	KJ08_059		8	13990791	Cheon et al. 2018
1690	chr8_14054517	SK08_14054517		8	14054517	Yang et al. 2019
1691	chr8_14184612	s08_14184612		8	14184612	Arbelaez et al. 2019
1692	chr8_14184710	KJ08_060		8	14184710	Cheon et al. 2019
1693	chr8_14361448	KJ08_061		8	14361448	Cheon et al. 2018
1694	chr8_14374315	KGH08_024		8	14374315	Cheon et al. 2020
1695	chr8_14593407	KJ08_062		8	14593407	Cheon et al. 2019
1696	chr8_14676962	s08_14676962		8	14676962	Arbelaez et al. 2019
1697	chr8_14715341	KGH08_025		8	14715341	Cheon et al. 2020
1698	chr8_14799421	s08_14799421		8	14799421	Arbelaez et al. 2019
1699	chr8_14908464	SK08_14908464		8	14908464	Yang et al. 2019
1700	chr8_14986111	s08_14986111		8	14986111	Arbelaez et al. 2019
1701	chr8_14994188	KJ08_064		8	14994188	Cheon et al. 2019
1702	chr8_15195898	KJ08_065		8	15195898	Cheon et al. 2018
1703	chr8_15200594	KGH08_026		8	15200594	Cheon et al. 2020
1704	chr8_15439243	s08_15439243		8	15439243	Arbelaez et al. 2019
1705	chr8_15481942	KGH08_027		8	15481942	Cheon et al. 2020
1706	chr8_15666434	s08_15666434		8	15666434	Arbelaez et al. 2019
1707	chr8_15752022	SK08_15752022		8	15752022	Yang et al. 2019
1708	chr8_16036605	KJ08_069		8	16036605	Cheon et al. 2018
1709	chr8_16436301	KJ08_070		8	16436301	Cheon et al. 2019
1710	chr8_16451909	KJ08_071		8	16451909	Cheon et al. 2018
1711	chr8_16612067	KGH08_029		8	16612067	Cheon et al. 2020
1712	chr8_16618829	s08_16618829		8	16618829	Arbelaez et al. 2019
1713	chr8_16880843	KJ08_072		8	16880843	Cheon et al. 2019
1714	chr8_17179846	SK08_17179846		8	17179846	Yang et al. 2019
1715	chr8_17319167	s08_17319167		8	17319167	Arbelaez et al. 2019
1716	chr8_17319329	KJ08_073		8	17319329	Cheon et al. 2018
1717	chr8_17439797	KGH08_030		8	17439797	Cheon et al. 2020
1718	chr8_17540888	KGH08_031		8	17540888	Cheon et al. 2020
1719	chr8_17618902	s08_17618902		8	17618902	Arbelaez et al. 2019
1720	chr8_17642104	KJ08_074		8	17642104	Cheon et al. 2019
1721	chr8_17643955	KGH08_032		8	17643955	Cheon et al. 2020
1722	chr8_17664969	KGH08_033		8	17664969	Cheon et al. 2020
1723	chr8_17714734	KGH08_034		8	17714734	Cheon et al. 2020
1724	chr8_17721768	SK08_17721768		8	17721768	Yang et al. 2019
1725	chr8_17925692	KJ08_075		8	17925692	Cheon et al. 2018
1726	chr8_18108496	s08_18108496		8	18108496	Arbelaez et al. 2019
1727	chr8_18221884	s08_18221884		8	18221884	Arbelaez et al. 2019
1728	chr8_18494713	KJ08_077		8	18494713	Cheon et al. 2018
1729	chr8_18552226	s08_18552226		8	18552226	Arbelaez et al. 2019
1730	chr8_18585825	s08_18585825		8	18585825	Arbelaez et al. 2019
1731	chr8_18719247	s08_18719247		8	18719247	Arbelaez et al. 2019
1732	chr8_18827037	KJ08_078		8	18827037	Cheon et al. 2019
1733	chr8_19033700	KGH08_036		8	19033700	Cheon et al. 2020
1734	chr8_19136483	KJ08_079		8	19136483	Cheon et al. 2018
1735	chr8_19220614	KGH08_037		8	19220614	Cheon et al. 2020
1736	chr8_19333715	KJ08_080		8	19333715	Cheon et al. 2019
1737	chr8_19351882	s08_19351882		8	19351882	Arbelaez et al. 2019
1738	chr8_19432537	KJ08_081		8	19432537	Cheon et al. 2018
1739	chr8_19716832	KGH08_038		8	19716832	Cheon et al. 2020
1740	chr8_19799253	KJ08_083		8	19799253	Cheon et al. 2018
1741	chr8_19833397	s08_19833397		8	19833397	Arbelaez et al. 2019
1742	chr8_19905228	KGH08_040		8	19905228	Cheon et al. 2020
1743	chr8_20053642	s08_20053642		8	20053642	Arbelaez et al. 2019
1744	chr8_20253954	KJ08_085		8	20253954	Cheon et al. 2018
1745	chr8_20358826	SK08_8008549		8	20358826	Yang et al. 2019
1746	chr8_20382857	SK08_20382857		8	20382857	Yang et al. 2019
1747	chr8_20456774	KJ08_086		8	20456774	Cheon et al. 2019
1748	chr8_20637053	KJ08_087		8	20637053	Cheon et al. 2018
1749	chr8_21011651	s08_21011651		8	21011651	Arbelaez et al. 2019
1750	chr8_21039211	KJ08_088		8	21039211	Cheon et al. 2019
1751	chr8_21253397	s08_21253397		8	21253397	Arbelaez et al. 2019
1752	chr8_21463546	KJS08_001		8	21463546	Cheon et al. 2020
1753	chr8_21582840	SK08_21582840		8	21582840	Yang et al. 2019
1754	chr8_21667240	s08_21667240		8	21667240	Arbelaez et al. 2019
1755	chr8_22119651	KJS08_003		8	22119651	Cheon et al. 2020
1756	chr8_22252502	s08_22252502		8	22252502	Arbelaez et al. 2019
1757	chr8_22776414	s08_22776414		8	22776414	Arbelaez et al. 2019
1758	chr8_22845257	SK08_22845257		8	22845257	Yang et al. 2019
1759	chr8_23040011	KJS08_006		8	23040011	Cheon et al. 2020
1760	chr8_23713744	s08_23713744		8	23713744	Arbelaez et al. 2019
1761	chr8_24125399	SK08_24125399		8	24125399	Yang et al. 2019
1762	chr8_24205833	s08_24205833		8	24205833	Arbelaez et al. 2019
1763	chr8_24753844	s08_24753844		8	24753844	Arbelaez et al. 2019
1764	chr8_24903648	s08_24903648		8	24903648	Arbelaez et al. 2019
1765	chr8_25157676	s08_25157676		8	25157676	Arbelaez et al. 2019
1766	chr8_25208014	SK08_25208014		8	25208014	Yang et al. 2019
1767	chr8_25275885	SK08_25275885		8	25275885	Yang et al. 2019
1768	chr8_25320080	SK08_25320080		8	25320080	Yang et al. 2019
1769	chr8_25343868	SK08_25343868		8	25343868	Yang et al. 2019
1770	chr8_25456191	SK08_25456191		8	25456191	Yang et al. 2019
1771	chr8_25467581	s08_25467581		8	25467581	Arbelaez et al. 2019
1772	chr8_25757847	s08_25757847		8	25757847	Arbelaez et al. 2019
1773	chr8_26223300	KJ08_089		8	26223300	Cheon et al. 2018
1774	chr8_26326397	SK08_26326397		8	26326397	Yang et al. 2019
1775	chr8_26448560	xa13_01		8	26448560	Arbelaez et al. 2019
1776	chr8_26503563	SK08_26503563		8	26503563	Yang et al. 2019
1777	chr8_26709228	xa13_02		8	26709228	Arbelaez et al. 2019
1778	chr8_26728254	SK08_26728254		8	26728254	Yang et al. 2019
1779	chr8_26755059	xa13_03		8	26755059	Arbelaez et al. 2019
1780	chr8_26788194	KJ08_090		8	26788194	Cheon et al. 2019
1781	chr8_26898822	xa13_04		8	26898822	Arbelaez et al. 2019
1782	chr8_26979434	KJ08_091		8	26979434	Cheon et al. 2018
1783	chr8_27039158	s08_27039158		8	27039158	Arbelaez et al. 2019
1784	chr8_27239923	KJ08_092		8	27239923	Cheon et al. 2019
1785	chr8_27282645	s08_27282645		8	27282645	Arbelaez et al. 2019
1786	chr8_27407698	KJ08_093		8	27407698	Cheon et al. 2018
1787	chr8_27563586	s08_27563586		8	27563586	Arbelaez et al. 2019
1788	chr8_27604168	KJ08_094		8	27604168	Cheon et al. 2019
1789	chr8_27805960	SK08_27805960		8	27805960	Yang et al. 2019
1790	chr8_27860056	KJ08_095		8	27860056	Cheon et al. 2018
1791	chr8_28125942	s08_28125942		8	28125942	Arbelaez et al. 2019
			8 개수	218
1792	chr9_148594	s09_148594		9	148594	Arbelaez et al. 2019
1793	chr9_243538	KJ09_001		9	243538	Cheon et al. 2018
1794	chr9_434420	KJ09_002		9	434420	Cheon et al. 2019
1795	chr9_496013	s09_496013		9	496013	Arbelaez et al. 2019
1796	chr9_591085	s09_591085		9	591085	Arbelaez et al. 2019
1797	chr9_929479	KJ09_004		9	929479	Cheon et al. 2019
1798	chr9_1098249	s09_1098249		9	1098249	Arbelaez et al. 2019
1799	chr9_1158812	SK09_1158812		9	1158812	Yang et al. 2019
1800	chr9_1467951	s09_1467951		9	1467951	Arbelaez et al. 2019
1801	chr9_1744797	KJ09_007		9	1744797	Cheon et al. 2018
1802	chr9_2298381	s09_2298381		9	2298381	Arbelaez et al. 2019
1803	chr9_2360445	SK09_2360445		9	2360445	Yang et al. 2019
1804	chr9_2380203	s09_2380203		9	2380203	Arbelaez et al. 2019
1805	chr9_2549780	KJ09_009		9	2549780	Cheon et al. 2018
1806	chr9_2930321	s09_2930321		9	2930321	Arbelaez et al. 2019
1807	chr9_3357568	s09_3357568		9	3357568	Arbelaez et al. 2019
1808	chr9_3603443	s09_3603443		9	3603443	Arbelaez et al. 2019
1809	chr9_3627789	KJ09_011		9	3627789	Cheon et al. 2018
1810	chr9_3717701	SK09_3717701		9	3717701	Yang et al. 2019
1811	chr9_3854200	KJ09_012		9	3854200	Cheon et al. 2019
1812	chr9_3934768	s09_3934768		9	3934768	Arbelaez et al. 2019
1813	chr9_4004403	KJ09_013		9	4004403	Cheon et al. 2018
1814	chr9_4136552	s09_4136552		9	4136552	Arbelaez et al. 2019
1815	chr9_4289783	KJ09_014		9	4289783	Cheon et al. 2019
1816	chr9_4595478	KGH09_001		9	4595478	Cheon et al. 2020
1817	chr9_4650293	s09_4650293		9	4650293	Arbelaez et al. 2019
1818	chr9_4668812	KJ09_015		9	4668812	Cheon et al. 2018
1819	chr9_4793301	SK09_4793301		9	4793301	Yang et al. 2019
1820	chr9_4962209	KJ09_016		9	4962209	Cheon et al. 2019
1821	chr9_4973082	KGH09_002		9	4973082	Cheon et al. 2020
1822	chr9_5008706	s09_5008706		9	5008706	Arbelaez et al. 2019
1823	chr9_5121916	KGH09_003		9	5121916	Cheon et al. 2020
1824	chr9_5126602	KGH09_004		9	5126602	Cheon et al. 2020
1825	chr9_5305969	s09_5305969		9	5305969	Arbelaez et al. 2019
1826	chr9_5343850	KJ09_018		9	5343850	Cheon et al. 2019
1827	chr9_5812738	s09_5812738		9	5812738	Arbelaez et al. 2019
1828	chr9_5922125	Sub1_01		9	5922125	Arbelaez et al. 2019
1829	chr9_5948910	KJ09_020		9	5948910	Cheon et al. 2019
1830	chr9_6093984	s09_6093984		9	6093984	Arbelaez et al. 2019
1831	chr9_6252407	Sub1_02		9	6252407	Arbelaez et al. 2019
1832	chr9_6360984	s09_6360984		9	6360984	Arbelaez et al. 2019
1833	chr9_6413498	KJ09_021		9	6413498	Cheon et al. 2018
1834	chr9_6657081	KJ09_022		9	6657081	Cheon et al. 2019
1835	chr9_6774928	s09_6774928		9	6774928	Arbelaez et al. 2019
1836	chr9_6796269	s09_6796269		9	6796269	Arbelaez et al. 2019
1837	chr9_6913547	Sub1_03		9	6913547	Arbelaez et al. 2019
1838	chr9_6982338	SK09_6982338		9	6982338	Yang et al. 2019
1839	chr9_7116276	s09_7116276		9	7116276	Arbelaez et al. 2019
1840	chr9_7280339	s09_7280339		9	7280339	Arbelaez et al. 2019
1841	chr9_7356016	KJ09_024		9	7356016	Cheon et al. 2019
1842	chr9_7555220	KJ09_025		9	7555220	Cheon et al. 2018
1843	chr9_8043218	s09_8043218		9	8043218	Arbelaez et al. 2019
1844	chr9_8073443	KJ09_027		9	8073443	Cheon et al. 2018
1845	chr9_8744926	KJ09_029		9	8744926	Cheon et al. 2018
1846	chr9_8851945	s09_8851945		9	8851945	Arbelaez et al. 2019
1847	chr9_8913296	KJ09_030		9	8913296	Cheon et al. 2019
1848	chr9_9087088	KJ09_031		9	9087088	Cheon et al. 2018
1849	chr9_9252104	s09_9252104		9	9252104	Arbelaez et al. 2019
1850	chr9_9431973	KGH09_006		9	9431973	Cheon et al. 2020
1851	chr9_9626056	s09_9626056		9	9626056	Arbelaez et al. 2019
1852	chr9_9674556	KJ09_033		9	9674556	Cheon et al. 2018
1853	chr9_9784212	s09_9784212		9	9784212	Arbelaez et al. 2019
1854	chr9_9837388	SK09_9837388		9	9837388	Yang et al. 2019
1855	chr9_9918781	KGH09_007		9	9918781	Cheon et al. 2020
1856	chr9_9945591	s09_9945591		9	9945591	Arbelaez et al. 2019
1857	chr9_10119114	s09_10119114		9	10119114	Arbelaez et al. 2019
1858	chr9_10123678	KJ09_035		9	10123678	Cheon et al. 2018
1859	chr9_10324014	s09_10324014		9	10324014	Arbelaez et al. 2019
1860	chr9_10741078	KGH09_009		9	10741078	Cheon et al. 2020
1861	chr9_10757351	s09_10757351		9	10757351	Arbelaez et al. 2019
1862	chr9_10788256	KJ09_036		9	10788256	Cheon et al. 2019
1863	chr9_10934233	s09_10934233		9	10934233	Arbelaez et al. 2019
1864	chr9_11237877	s09_11237877		9	11237877	Arbelaez et al. 2019
1865	chr9_11240172	KJ09_038		9	11240172	Cheon et al. 2019
1866	chr9_11439570	KJ09_039		9	11439570	Cheon et al. 2018
1867	chr9_11442404	KGH09_010		9	11442404	Cheon et al. 2020
1868	chr9_11540748	KGH09_011		9	11540748	Cheon et al. 2020
1869	chr9_11568260	KGH09_012		9	11568260	Cheon et al. 2020
1870	chr9_11653914	KJ09_040		9	11653914	Cheon et al. 2019
1871	chr9_11746684	s09_11746684		9	11746684	Arbelaez et al. 2019
1872	chr9_11776387	KJ09_041		9	11776387	Cheon et al. 2018
1873	chr9_11791221	KGH09_013		9	11791221	Cheon et al. 2020
1874	chr9_11848827	s09_11848827		9	11848827	Arbelaez et al. 2019
1875	chr9_11871485	s09_11871485		9	11871485	Arbelaez et al. 2019
1876	chr9_12029697	s09_12029697		9	12029697	Arbelaez et al. 2019
1877	chr9_12077897	KJ09_042		9	12077897	Cheon et al. 2019
1878	chr9_12211991	KJ09_043		9	12211991	Cheon et al. 2018
1879	chr9_12326525	s09_12326525		9	12326525	Arbelaez et al. 2019
1880	chr9_12358633	KGH09_014		9	12358633	Cheon et al. 2020
1881	chr9_12495597	KGH09_015		9	12495597	Cheon et al. 2020
1882	chr9_12546207	KGH09_016		9	12546207	Cheon et al. 2020
1883	chr9_12568549	KJ09_044		9	12568549	Cheon et al. 2019
1884	chr9_12575974	KGH09_017		9	12575974	Cheon et al. 2020
1885	chr9_12716578	KJ09_045		9	12716578	Cheon et al. 2018
1886	chr9_12959873	KGH09_018		9	12959873	Cheon et al. 2020
1887	chr9_13006983	KJ09_046		9	13006983	Cheon et al. 2019
1888	chr9_13589939	KJ09_049		9	13589939	Cheon et al. 2018
1889	chr9_13601851	KGH09_019		9	13601851	Cheon et al. 2020
1890	chr9_13760690	SK09_13760690		9	13760690	Yang et al. 2019
1891	chr9_13898873	KJ09_050		9	13898873	Cheon et al. 2019
1892	chr9_14184948	KJ09_051		9	14184948	Cheon et al. 2018
1893	chr9_14635830	KGH09_020		9	14635830	Cheon et al. 2020
1894	chr9_14700805	KJ09_052		9	14700805	Cheon et al. 2019
1895	chr9_14727088	SK09_14727088		9	14727088	Yang et al. 2019
1896	chr9_14796397	KJ09_053		9	14796397	Cheon et al. 2018
1897	chr9_14889045	SK09_14889045		9	14889045	Yang et al. 2019
1898	chr9_14920092	s09_14920092		9	14920092	Arbelaez et al. 2019
1899	chr9_14978933	KJ09_054		9	14978933	Cheon et al. 2019
1900	chr9_15213454	KJ09_055		9	15213454	Cheon et al. 2018
1901	chr9_15322775	s09_15322775		9	15322775	Arbelaez et al. 2019
1902	chr9_15429734	s09_15429734		9	15429734	Arbelaez et al. 2019
1903	chr9_15655654	KJ09_056		9	15655654	Cheon et al. 2019
1904	chr9_15765355	SK09_15765355		9	15765355	Yang et al. 2019
1905	chr9_15802245	KJ09_057		9	15802245	Cheon et al. 2018
1906	chr9_16277986	KJ09_059		9	16277986	Cheon et al. 2018
1907	chr9_16412063	SK09_16412063		9	16412063	Yang et al. 2019
1908	chr9_16616509	s09_16616509		9	16616509	Arbelaez et al. 2019
1909	chr9_17031996	KJ09_061		9	17031996	Cheon et al. 2018
1910	chr9_17213519	s09_17213519		9	17213519	Arbelaez et al. 2019
1911	chr9_17414249	KGH09_021		9	17414249	Cheon et al. 2020
1912	chr9_17447522	s09_17447522		9	17447522	Arbelaez et al. 2019
1913	chr9_17465569	KJ09_062		9	17465569	Cheon et al. 2019
1914	chr9_17680896	KJ09_063		9	17680896	Cheon et al. 2018
1915	chr9_17707080	s09_17707080		9	17707080	Arbelaez et al. 2019
1916	chr9_17872367	KJ09_064		9	17872367	Cheon et al. 2019
1917	chr9_18190238	KJ09_065		9	18190238	Cheon et al. 2018
1918	chr9_18306435	KJ09_066		9	18306435	Cheon et al. 2019
1919	chr9_18502078	KJ09_067		9	18502078	Cheon et al. 2018
1920	chr9_18597901	KJ09_068		9	18597901	Cheon et al. 2019
1921	chr9_18818854	KJ09_069		9	18818854	Cheon et al. 2018
1922	chr9_18868484	SK09_18868484		9	18868484	Yang et al. 2019
1923	chr9_19322095	s09_19322095		9	19322095	Arbelaez et al. 2019
1924	chr9_19337813	KJ09_071		9	19337813	Cheon et al. 2018
1925	chr9_19683788	s09_19683788		9	19683788	Arbelaez et al. 2019
1926	chr9_19709461	SK09_19709461		9	19709461	Yang et al. 2019
1927	chr9_20091056	KJ09_073		9	20091056	Cheon et al. 2018
1928	chr9_20138174	s09_20138174		9	20138174	Arbelaez et al. 2019
1929	chr9_20317688	KJ09_074		9	20317688	Cheon et al. 2019
1930	chr9_20497375	KJ09_075		9	20497375	Cheon et al. 2018
1931	chr9_20682114	s09_20682114		9	20682114	Arbelaez et al. 2019
1932	chr9_20688681	KJ09_076		9	20688681	Cheon et al. 2019
1933	chr9_21004828	KJ09_077		9	21004828	Cheon et al. 2018
1934	chr9_21127955	SK09_21127955		9	21127955	Yang et al. 2019
1935	chr9_21148430	s09_21148430		9	21148430	Arbelaez et al. 2019
1936	chr9_21196217	KJ09_078		9	21196217	Cheon et al. 2019
1937	chr9_21240672	SK09_21240672		9	21240672	Yang et al. 2019
1938	chr9_21348882	s09_21348882		9	21348882	Arbelaez et al. 2019
1939	chr9_21598192	KJ09_079		9	21598192	Cheon et al. 2018
1940	chr9_21604405	SK09_21604405		9	21604405	Yang et al. 2019
1941	chr9_21612758	s09_21612758		9	21612758	Arbelaez et al. 2019
1942	chr9_21667022	s09_21667022		9	21667022	Arbelaez et al. 2019
1943	chr9_21813051	KJ09_080		9	21813051	Cheon et al. 2019
1944	chr9_21885499	s09_21885499		9	21885499	Arbelaez et al. 2019
1945	chr9_21896910	s09_21896910		9	21896910	Arbelaez et al. 2019
1946	chr9_22076185	s09_22076185		9	22076185	Arbelaez et al. 2019
1947	chr9_22166657	KJ09_081		9	22166657	Cheon et al. 2018
1948	chr9_22173140	KJ09_082		9	22173140	Cheon et al. 2019
1949	chr9_22403093	KJ09_083		9	22403093	Cheon et al. 2018
			9 개수	158
1950	chr10_146531	s10_146531		10	146531	Arbelaez et al. 2019
1951	chr10_432398	KGH10_001		10	432398	Cheon et al. 2020
1952	chr10_493487	KJ10_001		10	493487	Cheon et al. 2018
1953	chr10_790044	s10_790044		10	790044	Arbelaez et al. 2019
1954	chr10_973578	KJ10_003		10	973578	Cheon et al. 2018
1955	chr10_1141117	KGH10_003		10	1141117	Cheon et al. 2020
1956	chr10_1562931	s10_1562931		10	1562931	Arbelaez et al. 2019
1957	chr10_1637004	KJ10_004		10	1637004	Cheon et al. 2019
1958	chr10_1796849	KJ10_005		10	1796849	Cheon et al. 2018
1959	chr10_1873548	s10_1873548		10	1873548	Arbelaez et al. 2019
1960	chr10_2064828	KJ10_006		10	2064828	Cheon et al. 2019
1961	chr10_2107854	KGH10_004		10	2107854	Cheon et al. 2020
1962	chr10_2129424	s10_2129424		10	2129424	Arbelaez et al. 2019
1963	chr10_2195402	KJ10_007		10	2195402	Cheon et al. 2018
1964	chr10_2241754	KGH10_006		10	2241754	Cheon et al. 2020
1965	chr10_2258418	s10_2258418		10	2258418	Arbelaez et al. 2019
1966	chr10_2335726	SK10_2335726		10	2335726	Yang et al. 2019
1967	chr10_2387834	KJ10_008		10	2387834	Cheon et al. 2019
1968	chr10_2438975	KGH10_007		10	2438975	Cheon et al. 2020
1969	chr10_2518001	KGH10_008		10	2518001	Cheon et al. 2020
1970	chr10_2524054	KGH10_009		10	2524054	Cheon et al. 2020
1971	chr10_2596048	KGH10_010		10	2596048	Cheon et al. 2020
1972	chr10_2760140	KJ10_009		10	2760140	Cheon et al. 2018
1973	chr10_3174353	KJ10_010		10	3174353	Cheon et al. 2019
1974	chr10_3187409	KJ10_011		10	3187409	Cheon et al. 2018
1975	chr10_3358419	s10_3358419		10	3358419	Arbelaez et al. 2019
1976	chr10_3382280	KJ10_012		10	3382280	Cheon et al. 2019
1977	chr10_3400212	s10_3400212		10	3400212	Arbelaez et al. 2019
1978	chr10_3502733	SK10_3502733		10	3502733	Yang et al. 2019
1979	chr10_3771667	KJ10_013		10	3771667	Cheon et al. 2018
1980	chr10_3833548	KJ10_014		10	3833548	Cheon et al. 2019
1981	chr10_4027971	KGH10_011		10	4027971	Cheon et al. 2020
1982	chr10_4053858	KGH10_012		10	4053858	Cheon et al. 2020
1983	chr10_4081648	KGH10_013		10	4081648	Cheon et al. 2020
1984	chr10_4281052	s10_4281052		10	4281052	Arbelaez et al. 2019
1985	chr10_4327595	KGH10_014		10	4327595	Cheon et al. 2020
1986	chr10_4664638	SK10_4664638		10	4664638	Yang et al. 2019
1987	chr10_4725869	KGH10_015		10	4725869	Cheon et al. 2020
1988	chr10_4744001	KGH10_016		10	4744001	Cheon et al. 2020
1989	chr10_4914965	KGH10_017		10	4914965	Cheon et al. 2020
[truncated: 580 more rows]
