# Supplementary material for: Development and Application of a Target Capture Sequencing SNP-Genotyping Platform in Rice
Source: Genes (Basel). 2022 Apr 28;13(5):794. doi: 10.3390/genes13050794 (PMC9141132; doi:10.3390/genes13050794)
Supplement: Supplementary file 1 [file genes-13-00794-s001.zip › Table_S4.xlsx]

## Sheet: Sheet1
Table S4. Density across each chromosome of SNP markers present on the target capture sequencing SNP-genotyping platform.
Chr.	No. of markers	Chr. size (Mbp)	Marker density (markers/Mbp)
1	271	43.2	6.27315
2	211	35.9	5.87744
3	188	36.4	5.16484
4	199	35.5	5.60563
5	166	29.9	5.55184
6	221	31.2	7.08333
7	161	29.7	5.42088
8	197	28.4	6.93662
9	153	23	6.65217
10	148	23.2	6.37931
11	253	29	8.72414
12	173	27.5	6.29091
Total	2341	372.9	6.3
