# Supplementary figures and images for: Development and Application of a Target Capture Sequencing SNP-Genotyping Platform in Rice
Source: MDPI journal article supplement (doi:10.3390/genes13050794), 2022-04-28

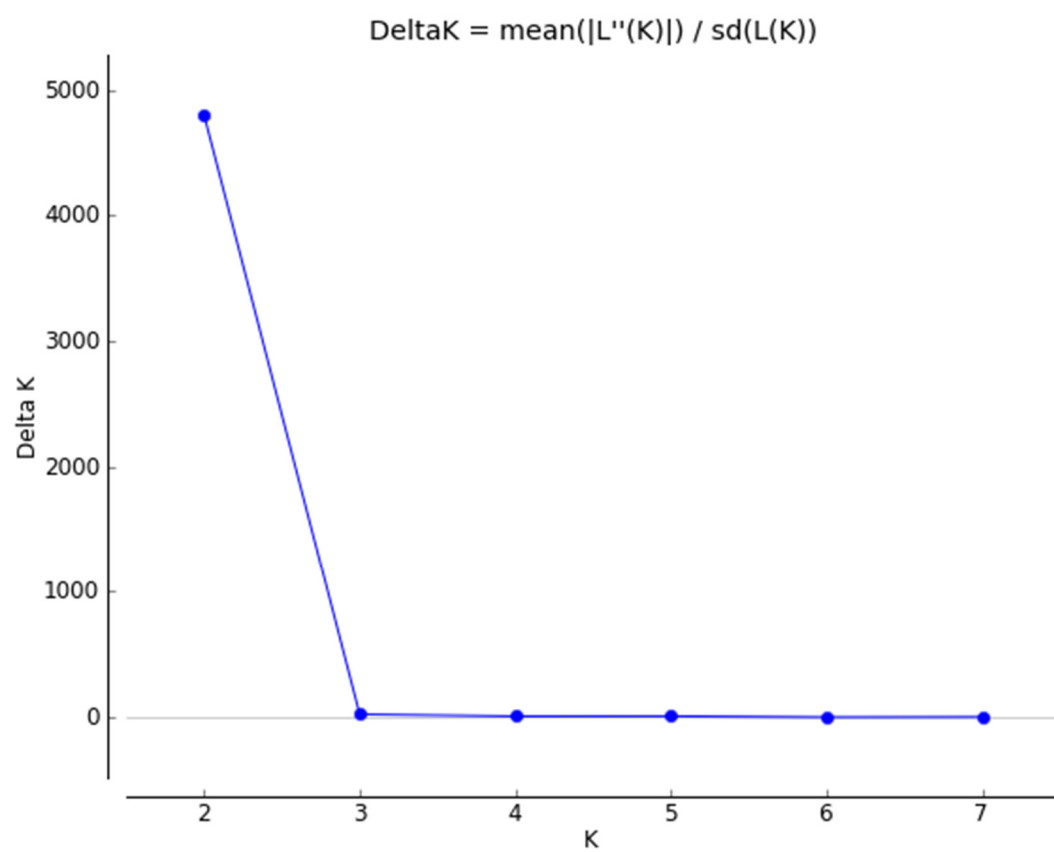

Figure S1. Estimation of the most probable K value using LnP(D) derived  $\Delta K$  for K from 1 to 8.

Supplement: s1 [file s1]
